# Supplementary material
Source: publisher figshare collection journal article supplement (https://acs.figshare.com/ndownloader/files/22138194)
Supplement: Supplementary file 1 [file 22138194]

## Sheet: A_Upstream
Upstream Regulator	Expr Fold Change	Molecule Type	Predicted Activation State	Activation z-score	Flags	p-value of overlap	Target Molecules in Dataset	Mechanistic Network
HNF4A	2.462	transcription regulator		-0.013		3.91e-28	AASS,ACAA2,ACOX2,ACSL1,ADH1B,ADH6,ADSS,AGA,AGXT2,AHNAK,AHSA1,AIMP1,ALDH1L1,ALDH2,ALDH8A1,AMT,ANXA5,AP1M1,APIP,APOA1,APOA4,APOC2,APOE,ARG1,ARMC8,ARPC5,ATG3,ATOX1,BAG6,BCCIP,BCKDHA,BCLAF1,BCS1L,BDH1,BHMT,BST1,C2,C6,C8G,CAMK2D,CAT,CBX3,CDC5L,CFL2,CHP1,CLTA,CPB2,CRIP1,CRKL,CRP,CSK,CTNNBL1,CYP4F2,DSC2,EFTUD2,EHD3,ELP3,EPPK1,ERLIN1,ETFDH,F11R,FAHD2A,FBP1,FEN1,FGA,FGB,FLNA,FN3KRP,FYCO1,G3BP2,G6PD,GBF1,G…	257 (4)
TP53		transcription regulator		1.248		1.98e-27	ABAT,ACAA2,ACACB,ACADM,ACADS,ACSL1,ACSM5,ACTL6A,ADD3,ADGRE5,AHSA1,ALDH1B1,ALDOA,ANLN,ANXA2,ANXA4,API5,APOA1,APOE,ASS1,ATPAF2,BAX,BCAT1,BMX,C2,CAMK2D,CAPNS1,CASP3,CAT,CD59,CDC25C,CENPF,CKB,CNN1,CNN2,CNN3,COL18A1,COL3A1,COL4A1,COL4A2,COL6A2,CORO1A,CSK,CSRP1,CTSH,CYB5A,DDX39A,DEK,DICER1,DNMT1,DTYMK,ECPAS,EIF4G2,ENO3,EPS8,F11R,FABP5,FAM120A,FAM3C,FBLN2,FEN1,FKBP5,FLAD1,FN1,FUBP1,G6PD,GRB2,GSN,H2AFY,H…	401 (17)
MYC		transcription regulator		1.859		2.79e-27	ABCD1,ABCF2,ACSL4,ALDOA,ANXA4,ANXA5,ARG1,ASS1,BAX,BCAT1,BCKDHB,CAD,CAPN2,CAPNS1,CASP3,CDC25C,CHP1,CNP,COL3A1,COL4A1,COL4A2,COL5A1,COL6A3,COL8A1,CRIP1,CSPG4,DEK,DKC1,DNMT1,ECM1,EFEMP1,EFTUD2,EIF2B4,EIF2S2,ELANE,F2,FABP5,FBLN2,FBLN5,FECH,FKBP5,FLNA,FMOD,FN1,G6PD,GBP2,GCSH,GDI1,GFPT1,GLS,GLUD1,GOT2,GPT,HMGA1,HNRNPA1,HNRNPA2B1,HNRNPD,HNRNPH1,HNRNPU,HSPB1,ICAM1,IGLL1/IGLL5,IKZF1,IPO7,IRF6,ITGAL,ITGAM,…	490 (20)
CST5		other	Inhibited	-3.841	bias	5.55e-22	ADRM1,AHNAK,ANXA2,ANXA5,AP3D1,BRIX1,COL12A1,CORO1A,DHX9,DKC1,DRAP1,EBNA1BP2,EEF1G,GAR1,HNRNPA2B1,HNRNPA3,HNRNPC,HNRNPH1,HNRNPU,KIF11,KRR1,LAMC1,MALSU1,MRTO4,MVP,MYCBP2,MYL9,NCBP1,NCL,NOP10,NUP107,NUP155,NUP205,PABPN1,PARP4,PCBP1,PPIC,PRPF6,PUF60,PUS1,RBM3,RPF2,RSL1D1,S100A11,SLC4A1AP,SLC9A3R2,SRSF1,SRSF9,SSRP1,TOMM22,TOMM40,TRRAP,UCHL5,VASP,VCAN,VIM,WDR3
TGFB1		growth factor	Activated	6.183		6.74e-21	AASS,ABCD1,ACAA2,ACSM3,AGR2,AHNAK,ALDH2,ALDOA,ANXA2,APOC2,APOE,ARG1,ASPN,ASS1,B2M,BAX,BDH1,C2,C5,CAPNS1,CAPRIN1,CASP3,CAT,CD59,CDC25C,CENPF,CFL1,CHD4,CNN1,CNN2,CNN3,COL12A1,COL18A1,COL3A1,COL4A1,COL4A2,COL5A1,COL6A1,COL6A2,COL6A3,COL8A1,CRIP2,CRP,CSPG4,CSRP1,CTPS1,CTSH,CTSS,CTTN,DES,DKC1,DNMT1,DOCK2,DPYSL3,DSC2,ECM1,EIF4H,ENO3,ENPP1,F2,FABP5,FAM3C,FBLN2,FBLN5,FGA,FGB,FGG,FLNA,FLNB,FN1,FUBP1,FUS,G…	454 (19)
PPARA		ligand-dependent nuclear receptor		-1.102		1.84e-15	ACAA1,ACAA2,ACADM,ACADS,ACSL1,ACSL5,ALDH2,ANXA2,APOA1,APOA4,APOC2,APOE,ARG1,ASS1,BAX,BCKDK,C2,C5,C6,CAT,CD63,CPS1,CTH,CYP4A11,EHHADH,F11R,FABP5,FGA,FGB,FGG,FTCD,G6PD,GLS,GLUD1,GOT2,GPD2,GPT,GSTZ1,HIST1H1C,HNF4A,HPD,IFITM3,LGALS4,MBL2,ME2,MKI67,MLYCD,MMP9,MVK,NFKB1,PAH,PBLD,PC,PCK1,PCNA,PLIN2,PPA1,RTN4,SARDH,SLC27A2,SMC4,SRM,TJP1,UCHL5	340 (19)
KRAS		enzyme		0.131		8.32e-15	ADAR,AGRN,AHNAK,AKR1B10,ALDOA,ARG1,B2M,BDH1,CAD,CASP3,CD74,CLNS1A,COL3A1,COL4A1,COL4A3,DCLK1,DNMT1,EFEMP1,EIF2AK2,ENOPH1,FBLN2,FN1,G6PD,GBA,GFPT1,GSN,GTF2I,HMGA1,HNRNPD,HSPB1,IFITM3,ITGAM,LAMA4,LAMA5,LCN2,LMNB1,MAPK14,MMP9,MRC1,MTHFD1,MX1,NCL,NFKB1,NME2,NPC1,NQO1,NSUN2,PALLD,PC,PIP4K2B,PKM,PPP1CA,PRKCD,PRPH,PTK2B,PYGM,RAB27A,RANBP1,RBBP7,RELA,RHOB,RHOC,SIRT1,SOD3,SQSTM1,TAP1,TCEA1,TCERG1,THBS1,TH…	414 (19)
PTP4A1		phosphatase		1.125		1.11e-14	ACTR2,ALDOA,ANXA5,BAX,COL5A1,COL6A1,COL6A2,FLNA,HNF4A,HNRNPA3,HNRNPH1,HNRNPH2,IGFBP7,NOP56,PCNA,PKM,PPA1,PPP1R12A,RAN,RUVBL1,SDHA,SEPT11,SMS,SRSF2,SRSF3,STMN1,TAGLN2,TUBA1C,VCAN,VIM	273 (7)
IL4		cytokine	Activated	3.749	bias	1.61e-14	ACOT9,ACSL1,ACSL4,ADRM1,AHCYL1,AHNAK,ALDH2,ANXA2,ANXA4,APOE,ARG1,ASS1,AUH,BANF1,BAX,CAD,CAPG,CASP3,CAT,CBX3,CD58,CD74,CHD4,CLNS1A,COL18A1,COL6A2,COL6A3,CRIP1,CYB5A,EBNA1BP2,EFHD2,EHHADH,EIF2AK2,FKBP5,FLNA,FLNB,FN1,FYCO1,GBP2,GP5,GPT,HCLS1,HSD11B1,HTRA2,ICAM1,IFI30,IFITM3,IGHG2,IL16,ITGA2,ITGAL,ITGAV,JCHAIN,KMO,KRR1,LACTB,LSP1,MAP4,MAPK1,MAPK3,MCM5,MKI67,MMP9,MRC1,MRE11,MVK,MYH9,NAP1L1,NCBP1,NCL,N…	445 (15)
ERBB2		kinase		0.806	bias	2.88e-14	ACAA2,ACSL4,AGR2,AHNAK,ANXA2,BAG2,BCKDHB,CD59,CDC25C,CDC37,CDC37L1,CENPF,CHD4,COL18A1,COL3A1,COL4A1,COL5A1,COL6A1,COL6A2,COL6A3,CPS1,CRIP1,CUL3,DPT,EHHADH,EPHX2,FBLN2,FEN1,FN1,GINS3,GLS,GPD2,GSTZ1,GYG1,HMGB2,HNRNPK,HSPB1,HSPB8,IRF6,ITGA2,JCHAIN,LCN2,LRRFIP1,LXN,MAP2K3,MAP4,MCM2,MCM5,MCM7,MKI67,MMP9,MRC1,MYL9,NDRG1,NFKB1,NID1,NRBP1,PCK2,PCNA,PGM1,PLIN2,POLR2A,POLR3B,PTPN1,RAB31,RHOB,RPA1,RPA2,SHMT…	410 (18)
beta-estradiol		chemical - endogenous mammalian	Activated	2.749		2.84e-13	ACAA1,ACAA2,ACADM,ACOX2,ACSL1,ACSM3,ACTL6A,ADH1C,AEBP1,AES,AGRN,AKAP2,ALDOA,ANXA4,AP3D1,APOA1,APOA4,APOE,ARF5,ARG1,BAX,BCAT1,BUB3,BYSL,CAD,CAP2,CASP3,CD74,CDC25C,CKB,CNN1,CNN2,CNP,COL3A1,CRP,CTPS1,CTSH,CTTN,CUL4A,CYB5A,DCLK1,DDX17,DNAJC3,ECHDC2,EIF3J,EML2,FABP5,FBLN1,FBLN2,FEN1,FGB,FLNB,FMO5,FMOD,FN1,G6PD,GALNT7,GARS,GBP2,GCSH,GINS3,GMFB,GPD2,GYG1,HNRNPA1,HNRNPD,HNRNPK,HS1BP3,HSD11B1,HSD17B7,HSP9…	444 (18)
mir-122		microRNA	Inhibited	-3.351	bias	3.77e-13	ALDOA,CACYBP,CSRP1,G6PD,GNPDA1,GPT,KHDRBS1,KIF5B,LAMC1,LETM1,LMNB2,MAP4,MAPRE1,MVK,PKM,PLIN3,PTPN1,RAD21,RBM3,RCC2,SEPT9,SF3B4,SH3BGRL3,TPD52L2,VIM
ESR1		ligand-dependent nuclear receptor	Activated	2.615		5.46e-13	AASS,ACSL1,ACTR2,ADD3,ADH1C,AES,AFMID,AHNAK,ANLN,ANP32A,ANXA4,AP1M1,APOA1,APOE,ASS1,ATG3,AZU1,BAX,BCAT1,BCCIP,BCLAF1,BUB3,BYSL,C5,CAP2,CAPN2,CD59,CDC5L,CENPF,CFL2,CKB,CNN1,COG2,COL8A1,CPNE1,CRKL,CTSS,CYP4A11,DDX17,DYNC1I2,EFEMP1,ENY2,FBLN1,FLNA,G6PD,GALNT7,GCSH,GSN,GYG1,HNRNPD,HSD17B7,HSPA2,HTRA2,ICAM1,IFITM3,IPO7,KHDRBS1,KIF5B,KPNA3,LANCL1,LBP,LCN2,LIMA1,LTBP1,LTF,MAPK1,MARCKS,MKI67,MMP9,MX1,MYO…	455 (17)
HRAS		enzyme		0.398		6.34e-13	ADGRE5,AKAP2,ANXA2,B2M,BAX,CAPG,CAPN2,CNN1,CNN2,COL18A1,COL3A1,COL4A1,COL6A2,CRP,CSRP1,CSTA,CTSS,DNMT1,DTYMK,EFEMP1,ENPP1,FBLN2,FLNA,FN1,GIMAP1,GSN,H2AFY2,HMGB1,HNRNPA2B1,HNRNPUL1,HSPB1,ICAM1,IFI30,IGKC,IGLL1/IGLL5,ITGAM,ITGAV,KHDRBS1,LMNB1,LPP,LSP1,LXN,MAPK1,MAPK3,MFGE8,MMP9,MRPL12,MYL9,NID1,NID2,NOP58,NPM1,NQO1,PCK1,PCNA,PFN1,PLOD1,PML,POSTN,PPIC,PRKCD,RBBP4,RBBP7,RELA,RHOB,RPS27,RTN4,SASH1,SDH…	393 (17)
imatinib		chemical drug	Inhibited	-3.155		1.08e-12	BAX,BCAT1,CASP3,COL3A1,CUL3,DNAJC10,EIF4B,FECH,FN1,HMGB1,HSBP1,HSP90AB1,HSPA2,HTRA2,IGKC,ITGAM,KIF11,LAMTOR3,MCM7,NCL,NDUFB5,NDUFB8,NPM1,NQO1,OPTN,PCNA,PLIN2,PPA1,PPIF,RAB31,RBM25,RPS6KB1,RTN4,SF3B4,SIRT1,SLC25A6,SMC1A,SNRPD3,SNRPF,SON,SRSF1,SRSF10,SRSF2,SRSF5,SRSF6,SRSF7,TRA2B	435 (18)
nitrofurantoin		chemical drug	Activated	2.504		4.1e-12	ACAA1,ACADM,ANXA2,ANXA5,APOE,ASS1,BAX,CAPN2,CASP3,CAT,CPS1,CRP,CTSS,CYP4A11,EHHADH,FGA,FGB,GPX2,HNF4A,LBP,MAPK3,NQO1,PCNA,RPL13A,RPS6KB1,S100A10,S100A11,SERPINA1,SLC27A2,STMN1,TIMP1,TUBB
dexamethasone		chemical drug		-0.339		1.46e-11	ACADM,ACADS,ACOT7,ACSL1,ACSL4,AEBP1,AES,ALDH1B1,ALDH1L1,APOA1,APOA4,APOE,ARHGAP17,ARMC8,ASPN,AUH,AUP1,AZU1,B2M,BAX,BCKDHA,BCKDK,BCLAF1,BHMT,BMX,C5,CASP3,CAT,CD59,CD74,CFL1,CHD4,CLIC1,CNN2,CNN3,COG2,COL3A1,COL4A1,COL4A2,COL4A3,COL5A1,COL6A1,COL6A2,CPB2,CPS1,CRIP1,CRP,CYP4A11,DDAH2,DHRS1,DHX9,DNAJC3,DPYSL3,DTYMK,EHHADH,ENPP1,EPB41,ERLIN1,FABP5,FBLN1,FBLN2,FBP1,FGA,FGB,FGG,FGGY,FKBP5,FLNB,FN1,G6PD,G…	478 (17)
trichostatin A		chemical drug		1.94		1.83e-11	AGRN,ANP32A,APOE,ARG1,B2M,BAX,BCAT1,CAD,CAP2,CASP3,CD58,CDC25C,COL6A3,CTPS1,DEK,DNMT1,DTYMK,EHD1,EIF2AK2,EIF4B,FBLN1,FN1,FUBP1,G6PD,GDI1,GINS3,GRB2,GSN,HBZ,HMGB1,HNRNPA2B1,HNRNPD,ICAM1,IKZF1,ILF3,ITGAM,JCHAIN,LIMA1,LMNA,LMNB1,LTBP1,MANF,MAP4,MCM2,MMP9,MNDA,MRC1,MVK,NDRG1,NDRG2,NPC1,NQO1,NXF1,PAH,PAK2,PCNA,PPP1R12A,PRKCD,RABL3,RAD21,RAN,RBM39,RCC2,RELA,RHOB,RPS27,RTN4,S100A10,SQSTM1,SRI,SRSF1,SRSF…	471 (19)
methapyrilene		chemical drug	Activated	2.688		3.01e-11	ABAT,ACAA1,ACADM,ACADS,ALDOA,ANXA2,ANXA5,APOE,ASS1,BCKDHA,BHMT,CAT,CPS1,CRP,CTSS,CYP4A11,EHHADH,FBP1,FGA,KYNU,MAPK14,PC,RPL13A,SLC27A2,STMN1,SULT1A1,TUBB,UPB1
OSM		cytokine	Activated	3.743		6.85e-11	ACAA1,ACSL5,AHCYL1,AKR1B10,ANXA2,ARG1,B2M,CASK,CAT,CBX3,COL3A1,COL6A1,COL8A1,CRP,CTSH,DNAJC3,DSC2,ECM1,EXOSC10,FGA,FGB,FMO5,FN1,GBP2,GCA,GFPT1,GRHPR,HSD11B1,HSPA2,ICAM1,ITGAL,KIF5B,KRR1,LBP,LCN2,LRRFIP1,MAPK14,MARCKS,MCM7,MMP9,MRC1,MX1,MYCBP2,NEDD4L,PAK2,PCNA,PYGL,RAB31,RALY,RELA,SEPT9,SERPINA1,SON,SYNE1,TAP1,TAP2,TAPBP,TIMP1,TM7SF2,TNC,TRIM22,TRRAP	447 (17)
sirolimus		chemical drug	Inhibited	-4.875	bias	7.76e-11	ABHD11,ACACB,ACADM,ADSS,ANXA5,ARG1,ASS1,B2M,BAX,BCKDHA,CASP3,CLIC1,DES,EIF2AK2,FN1,FUS,G6PD,HGS,HMGB1,HNRNPU,HSP90AB1,ICAM1,IL16,LCN2,LMNA,MMP9,MRC1,NCL,NEDD8,NPM1,PCNA,PFKP,PGM1,PKM,PLIN2,PML,POSTN,PSME3,RAN,RELA,RPL13A,RPL35,RPL37A,RPL8,RPS27,RPS6KB1,SAP18,SCPEP1,SFN,SIRT1,SNRPF,SQSTM1,SRC,SRSF3,STMN1,TIMP1,TMPO,TPM3,TUBB2A,VIM,ZNF207	433 (19)
5-fluorouracil		chemical drug		-1.34		8.14e-11	AHSA1,ALDOA,ANXA2,ANXA4,BAX,CAPNS1,CASP3,ECHS1,EEF1G,EIF2S2,ELOB,GARS,GOT2,GSN,GTF2I,HNRNPA1,HNRNPA2B1,HNRNPC,HSP90AB1,ILF2,MVP,NCL,NOP56,PCBP1,PKM,POLR2B,RBMX,RHOB,RPL35,SLC25A6,SMS,SNRPF,SQSTM1,SRM,SRP9,SRSF2,SUB1,THBS1,YBX1	426 (15)
butyric acid		chemical - endogenous mammalian		-0.451		9.55e-11	ADGRE5,ADH6,ANXA2,ANXA5,BAX,C7,CASP3,CDC25C,COL4A1,COL4A2,COL5A1,COL6A3,CYP4A11,DEK,DTYMK,EIF4G2,ELANE,ESYT2,F10,GBP2,GDI1,GSN,HBZ,HIST1H1C,HMGB1,HMGB2,HSPG2,ICAM1,IFI30,ITGAM,ITSN2,JCHAIN,MKI67,MMP9,MVP,NCL,NDUFAF4,NFKB1,NPM1,PCK1,PCNA,PDK3,PRKCD,PTPN1,PYGL,RBBP4,RELA,SEPT7,SIPA1,SRSF2,TGFBI,TIMP1,TP53I3,TPR	455 (19)
E2F1		transcription regulator		1.644	bias	1.84e-10	ACSL5,BAX,BCS1L,BUB3,CASP3,CD2AP,CKB,CLIC1,CRIP2,CRKL,CYB5A,DDAH2,DNMT1,EIF2AK2,EXOSC9,FEN1,HMGA1,HMGB1,HMGB2,HNRNPD,HNRNPK,HNRNPR,ICAM1,IDH3A,LACTB,MAPK14,MCM2,MCM5,MCM7,MTHFD1,NCL,NEDD8,PCNA,PRKDC,RAB1A,RACGAP1,RAN,RANBP1,RBBP4,RPA2,RPA3,RSL1D1,RUVBL1,SAFB,SDHA,SMC4,SRSF1,SRSF2,STMN1,TAP1,TAP2,TAPBP,THBS1,TOP2B,TRIM28,UCHL5,VIM	411 (17)
CCR2		G-protein coupled receptor	Activated	3.232	bias	2.44e-10	AEBP1,ARG1,ASPN,COL12A1,COL4A1,COL4A2,COL6A1,COL6A2,COL6A3,DPT,FBLN1,FBLN2,FN1,GPT,HSPG2,ITGAL,MMP9,PLOD1,PLOD3,TGFBI,THBS1,TIMP1,TNC,VCAN	468 (18)
EGFR		kinase	Activated	2.619		2.69e-10	ACOT7,ARG1,BAX,CAD,CASP3,CELF1,COL3A1,COL6A1,COL6A2,COL8A1,CUL3,DSC2,ENOPH1,FBLN2,HMGA1,HMGB3,HNRNPA1,HNRNPA2B1,HNRNPD,HNRNPH1,HNRNPK,HSPB1,ICAM1,ITGA2,LAMA4,LCN2,MARCKS,MMP9,MTHFD1,NCL,NDUFB8,NSUN2,PCNA,PIP4K2B,PKM,POSTN,RANBP1,RBBP7,RELA,RHOB,RRAS,SDF2L1,SRSF1,TCERG1,THBS1,TIMM9,TNC,TUBB4B,VCAN,VIM	391 (18)
MMP3		peptidase		1.953		3.67e-10	ADAR,CAPRIN1,DDX39A,EFTUD2,MMP9,NDRG1,PNN,PPIL1,PRPF31,RBM14,RBM39,RBM8A,SAFB,SF3A1,SF3A3,SF3B4,SQSTM1,SRSF1,SRSF2,SRSF3,TRA2B,VIM,YBX1	332 (7)
SP2509		chemical reagent	Inhibited	-2.385		1.18e-09	ANP32A,BCAT1,CAP2,CD58,CENPF,DEK,EHD1,EIF2AK2,EIF4B,FN1,FUBP1,GDI1,GRB2,HMGB1,HNRNPA2B1,HNRNPD,ILF3,LMNB1,LTBP1,MANF,MCM2,MKI67,NQO1,PAK2,PCNA,RABL3,RAD21,RAN,RBM39,RCC2,RTN4,SRI,SRSF1,SRSF6,TAP2,TCEA1,TNC,TPD52,TRRAP,UCHL5,VCAN
pirinixic acid		chemical toxicant		-1.494	bias	1.73e-09	ACAA1,ACAA2,ACACB,ACADM,ACADS,ACSL1,ACSL4,ACSL5,ADH1C,AKR1B10,ANXA2,APOA1,APOA4,APOC2,APOE,BAX,C5,CAT,CD63,CRP,CYP4A11,EHHADH,ETFDH,FABP5,FBP1,FEN1,FGB,G6PD,GOT2,GPD2,GRHPR,HIST1H1C,HNF4A,HSPB1,IFITM3,ITGAM,LCN2,LGALS4,MBL2,MLYCD,MMP9,NAP1L1,NPC1,PCK2,PCNA,PGM1,PLIN2,PPIC,RTN4,SLC27A2,UCHL5	318 (15)
methotrexate		chemical drug		0.658		2.07e-09	ABCD1,ACAA1,ACAA2,ACACB,ACADM,ACSL4,ALDOA,ANXA4,ASS1,AUH,C2,C5,C6,C7,C8B,CASP3,COL4A1,CRP,CTSS,CYP4A11,ECHS1,EHHADH,ENO3,FGA,GSN,HSD11B1,ICAM1,LBP,MAPK14,NQO1,PCK1,RPS6KB1,S100A11,SLC27A2,THBS1	400 (14)
gentamicin		chemical drug	Activated	4.572		2.31e-09	ABAT,ACAA1,ACADM,ACADSB,ACSM3,BAX,DDX39A,EIF2B4,EPHX2,ETFDH,HNF4A,HNRNPU,HSPB1,ICAM1,KMO,KYNU,LCN2,MYBBP1A,NCL,NOP58,NPM1,PC,PFDN2,PLIN2,PNN,PTBP1,PTPN1,RUVBL1,SQSTM1,SUOX,TAP1,THY1,TIMP1,TUBB,UPB1
MYCN		transcription regulator		-0.237		2.84e-09	ABCD1,ABCF2,ALDOA,B2M,BAX,CAD,COL18A1,COL4A1,COL8A1,DPYSL3,EEF1G,EIF4G2,FN1,GRB2,HMGA1,HSP90AB1,IGFBP7,ITGA2,MAP4,MRC2,MRE11,MYH9,NCL,NDRG1,NME2,NPM1,RBBP4,RBBP7,RPL13A,RPL35,RPL37A,RPL8,RPS27,S100A10,SIRT1,TUBB,VIM,ZYX	366 (14)
tazemetostat		chemical drug	Inhibited	-2.443		4.06e-09	ANP32A,BCAT1,CAP2,CD58,DEK,EHD1,EIF2AK2,EIF4B,FN1,FUBP1,GDI1,GRB2,HMGB1,HNRNPA2B1,HNRNPD,ILF3,LMNB1,LTBP1,MANF,MCM2,NQO1,PAK2,PCNA,RABL3,RAD21,RAN,RBM39,RCC2,RTN4,SRI,SRSF1,SRSF6,TAP2,TCEA1,TNC,TPD52,TRRAP,UCHL5,VCAN
COLQ		other		0.18		9.41e-09	AGRN,ASPN,COL4A1,COL4A2,COL6A3,COL8A1,ECM1,FBLN5,FN1,HSPG2,LAMA4,LTBP1,MMP9,NID1,NID2,TIMP1,VCAN
ciprofibrate		chemical drug		-0.499		1.15e-08	ACAA1,ACADM,ANXA2,APOC2,CAT,CD63,COL4A2,CPS1,CRP,CYP4A11,EHHADH,FGA,FGB,HPD,HSD11B1,LCN2,LHPP,MBL2,NPC1,PAH,PLIN2,RBM3,SERPINA1,SQSTM1,TAGLN2	360 (19)
PML	2.388	transcription regulator		0.915		1.59e-08	ACACB,ACADM,ACADS,ACSL4,ANXA4,APOA1,APOE,BAX,CACYBP,CAT,CFL1,CIAPIN1,HBZ,HSPB1,MAPK1,MX1,NDRG1,NQO1,OAS3,PML,SQSTM1,STMN1,TAP1,TAP2,TPD52L2,VIM	448 (17)
CD 437		chemical drug	Inhibited	-4.977	bias	1.82e-08	ALDOA,API5,BANF1,BAX,CDC25C,CLIC1,EIF4B,FKBP5,HMGB1,HNRNPA1,HNRNPC,ILF2,NARS,NOP10,NPM1,PCBP1,PFN1,PLP2,RBMX,RPL13A,RPL8,RPS27,SAP18,SEPT7,SET,SH3BGRL3,SLC25A6,SNRPF,SRSF3,YBX1
arsenic trioxide		chemical drug		-1.008		2.1e-08	BAX,BCAT1,BLVRA,CDC25C,CTH,CUL3,DNAJC10,DNMT1,EPX,FECH,FN1,HSBP1,HSP90AB1,HSPA2,HTRA2,ITGAM,KIF11,LAMTOR3,MCM7,MMP9,NCL,NDUFB5,NDUFB8,NPM1,NQO1,PCNA,PML,PPA1,PPIF,RAB31,RBM25,RELA,RTN4,SF3B4,SHMT1,SIRT1,SLC25A6,SMC1A,SON,SRSF10	450 (19)
tretinoin		chemical - endogenous mammalian		0.899		5.45e-08	ACACB,ACSL1,ADAR,ADD3,AHNAK,AIMP1,ANXA2,ANXA5,APOE,ARG1,BHMT,CAD,CAPN2,CASP3,CD63,CD74,COL3A1,COL4A1,COL4A2,COL4A3,COL6A3,CTSS,CYP4A11,CYP4F11,CYP4F2,DDAH2,DNMT1,DPYSL3,EEF1G,EHD1,EIF2AK2,FABP5,FN1,GARS,GCA,GPX2,GRB2,HGS,HIP1,HMGA1,HNF4A,HNRNPC,HNRNPD,HNRNPK,HSD11B1,HSPA2,HSPB1,ICAM1,IGFBP7,IKZF1,IL16,ILF3,ITGA2,ITGAL,ITGAM,JCHAIN,KIF11,LAMA4,LBP,LCN2,LSP1,LTF,MAP2K3,MDN1,MMP9,MNDA,MYH9,NAE1,NCL,…	440 (16)
methylselenic acid		chemical reagent		-1.342		5.73e-08	ADD3,CDC25C,CENPF,CORO1A,DNAJC3,DTYMK,FKBP5,FN1,G3BP2,KIF11,LMNB2,MANF,MAP2K3,MAPK1,MAPK14,MAPK3,MCM2,MCM5,MCM7,MKI67,NDRG1,NEDD4L,NFKB1,NQO1,PCNA,PFDN5,PPP5C,RAB31,RHOB,RPA2,STX7,TUBB4B,UGT2B7	490 (21)
vancomycin		biologic drug	Activated	2.895	bias	7.83e-08	AASS,ANXA2,CAT,FGA,FGB,GPX2,LCN2,LXN,MRC1,RBM3,RTN4,S100A10,S100A11,SOD3,TES,TIMP1,TUBB,VIM
doxorubicin		chemical drug	Activated	2.527		1.02e-07	ABCF2,ANXA2,BAX,CAMK2D,CASP3,CAT,CDC25C,COL3A1,DES,DNMT1,FBLN1,FGA,FGB,GPX2,HMGB1,HSPB6,IGFBP7,ISCU,LCN2,LIMA1,LXN,MAP4,MRC1,MVP,MYO6,NDRG1,NFKB1,NQO1,PCNA,PFKM,PRODH2,RBM3,RBM39,RELA,S100A10,S100A11,SFN,STMN1,TAP1,TAP2,TES,TIMP1,TP53I3,TUBB,VIM,YBX1	404 (18)
decitabine		chemical drug		1.746		1.69e-07	AGRN,ANP32A,ANXA2,APOE,B2M,BAX,BCAT1,CAP2,CD58,COL3A1,COL6A3,DEK,DNMT1,EEF1G,EHD1,EIF2AK2,EIF4B,FECH,FN1,FUBP1,GDI1,GRB2,GSN,HMGB1,HNF4A,HNRNPA2B1,HNRNPD,HSPB8,IGFBP7,ILF3,ITGA2,ITGAV,LMNB1,LTBP1,LXN,MANF,MCM2,MECP2,MKI67,MMP9,MX1,NDRG1,NQO1,PAK2,PCNA,POLR2A,RABL3,RAD21,RAN,RBM39,RCC2,RPS27,RTN4,S100A10,SERPINH1,SFN,SRI,SRSF1,SRSF6,TAP2,TCEA1,TGFBI,THBS1,TNC,TPD52,TRRAP,UCHL5,VCAN,VIM,YKT6	426 (18)
miR-16-5p (and other miRNAs w/seed AGCAGCA)		mature microRNA	Inhibited	-3.766	bias	2.37e-07	ABCF2,ADSS,ANLN,CAPRIN1,CFL2,EIF4G2,F2,GALNT7,GFPT1,GRB2,HARS,HMGA1,ITGA2,KPNA3,LAMC1,LAMTOR3,LAMTOR5,MAPK3,PNN,PPIF,RAB21,RIDA,RTN4,SLC12A2,SQSTM1,TMEM43,TPM3,ZYX
IPMK		kinase	Activated	3	bias	2.48e-07	CAPNS1,CORO1A,CSRP1,FLNA,HSP90AB1,MYL6,MYL9,PFN1,TAGLN2	58 (5)
bezafibrate		chemical drug	Inhibited	-2.252	bias	3.13e-07	ABCD1,ACACB,ACAD11,ACADM,ACSL1,ACSL4,ACSL5,APOA1,APOC2,APOE,CAT,CRP,CYB5A,EHHADH,FGB,NPC1,PCNA,SLC27A2	313 (15)
PAX3		transcription regulator				3.62e-07	ASS1,C8G,CPN2,CTTN,ECPAS,EXOSC9,FUBP1,G6PD,GLDC,GPT,HARS,HNRNPA3,HSPG2,MMP9,PAK2,PCNA,PEA15,RAB11B,RAB31,RBM25,RHOB,SFN,SHMT1,SRSF3,TNC,URB2,VCAN	334 (7)
lactacystin		chemical - protease inhibitor	Activated	2.408		4.44e-07	CDC25C,CFL1,CLIC1,CYB5A,EBNA1BP2,FBP1,FUS,GBA,HMGB2,HNRNPA2B1,HSPB1,HSPB8,MMP9,MRTO4,NEDD8,OPTN,PAK2,PEA15,PFN1,PPP5C,RANBP1,RANGAP1,SQSTM1,STMN1,SUB1,TCERG1,TUBB2A	427 (17)
IL5		cytokine	Activated	3.237	bias	4.46e-07	ACAA2,ALDOA,ANXA2,ASS1,CD63,CRIP1,EPS8,GBP2,ICAM1,IFI30,ITGAM,ITGAV,JCHAIN,LMNB1,MANF,MMP9,NDRG1,PFKP,PGM1,PKM,PPIF,PPP5C,PRRC2A,RAB21,RBM3,SCEL,SDF2L1,SRI,THY1,TMF1,TRA2A,UPB1,VIM,ZYX	411 (15)
mono-(2-ethylhexyl)phthalate		chemical toxicant		0.195	bias	4.76e-07	ACACB,ACADM,ACADSB,ACSL1,ACSL4,BAX,CYP4A11,ECHS1,EIF3J,FAM98A,G6PD,GFPT1,IDH3A,KIF5B,MLYCD,NDUFB5,NFKB1,PC,PCK1,PLIN2,POLR2A,PPA1,RELA,SDHA	308 (12)
ROCK1		kinase	Activated	3.148	bias	5.04e-07	CNN1,COL3A1,COL4A2,COL5A1,COL6A2,COL8A1,FBLN2,ICAM1,LAMA4,LAMC1	330 (10)
dimethylnitrosamine		chemical toxicant	Activated	2.227	bias	5.64e-07	COL3A1,COL4A1,CRP,DES,ICAM1,MAPK3,MMP9,NQO1,PCNA,RAB13,TIMP1,VIM	430 (16)
rosiglitazone		chemical drug	Inhibited	-2.481		5.65e-07	ACAA2,ACADM,ACADS,ACSL1,ACSL5,APOE,ARG1,BAX,CASP3,CAT,COL3A1,COL6A1,CRP,EHHADH,EPHX2,ETFDH,FABP5,FGB,FN1,GBP2,GYG1,HSD11B1,ICAM1,IDH3A,ITGAL,ITGAM,LCN2,MCM7,MLYCD,MMP9,OAS3,PC,PCK1,PCNA,PEA15,PFKM,PLIN2,POSTN,PTPN1,SDHA,SLC27A2,THBS1,THBS2,TIMP1,TNC,TPM3,TRIM22	392 (21)
COL4A3	2.651	other				5.99e-07	COL3A1,COL4A1,COL4A2,FN1,ITGA2,LAMC1,MAPK14,MMP9,TIMP1	375 (14)
RHO		G-protein coupled receptor		-0.653		6.06e-07	ACADM,B2M,CASP3,CD74,CTSS,DPYSL3,EIF2A,EPB41,FBLN1,HCLS1,HIST1H1C,HMGB2,NID1,PRPH	68 (3)
methylprednisolone		chemical drug		0.588		6.64e-07	ABAT,ACSL1,ANXA2,ARG1,ASS1,B2M,BDH1,CD74,CNN3,CNP,CPS1,CSNK2B,CTSH,CTSS,DSC2,EPHX2,FABP5,FBLN5,FN1,GBP2,GLUD1,GPT,GRHPR,HPD,ITGA2,KMO,MAPK14,MGAT1,MMP9,MVK,MYBBP1A,NAP1L1,NAT8,NCL,NPM1,PC,PCNA,PLIN2,PTPN1,RAB13,RUVBL1,SCEL,SERPINA1,SNX1,SOD3,SRI,SULT1B1,TAPBP,TUBA1C,VIM,ZYX	409 (16)
ACOX1		enzyme		-1.095		6.7e-07	ACAA1,ACADM,ACSL1,ANXA2,CAT,CD63,COL4A2,CYP4A11,EHHADH,HPD,HSD11B1,LCN2,LHPP,MBL2,MFGE8,PAH,PLIN2,RBM3,SERPINA1,SLC27A2,SQSTM1,TAGLN2	124 (7)
MKNK1		kinase	Activated	3.771	bias	6.89e-07	ACOT7,AGRN,ANXA2,ANXA5,AP3D1,DPYSL3,FLNA,FLNB,GPS1,HSPA2,LAMC1,LCN2,MAPK1,MYO6,PTBP1,SERPINH1,TM9SF2,VIM
miR-1-3p (and other miRNAs w/seed GGAAUGU)		mature microRNA	Inhibited	-4.668	bias	7.49e-07	ABHD11,ADAR,AGRN,ANP32B,ANXA2,AP3D1,BCKDHB,CNN3,CSRP1,F2,FBLN2,G6PD,GPD2,MRC2,PDLIM7,PTBP1,SEC23IP,SH3BGRL3,SRSF9,SYNE1,TAGLN2,THBS1,TPM2,TPM3,TRAPPC3,YWHAQ
SP1		transcription regulator	Activated	3.81	bias	8.19e-07	ACSL1,ADD3,AEBP1,APOA1,APOE,ASS1,BAG2,BAX,CAD,CASP3,CAT,CD59,CDC25C,CIRBP,CKB,COL8A1,CTH,DRG2,EIF2AK2,ELANE,F10,FLNA,FN1,HBZ,HMGA1,HNF4A,HSD17B7,ICAM1,IFITM3,ITGA2,ITGAM,ITGAV,MECP2,MMP9,MRC1,NDRG1,NFKB1,PARP1,PCK1,PKM,PRKCD,PSIP1,PTPN1,RANBP1,RELA,RRAS,SIRT1,SRC,TIMP1,TNC,UFD1,VIM,VWF	490 (21)
gentamicin C		chemical drug	Activated	2.673	bias	9.16e-07	ANXA2,FGA,FGB,GPX2,LCN2,LXN,MRC1,RBM3,S100A10,S100A11,TES,TIMP1,TUBB,VIM
desmopressin		biologic drug		-0.473		9.66e-07	ADD3,AHNAK,CAPG,EIF4B,FLNA,LIMA1,LMNA,NDRG2,PPP2R5D,RBM14,S100A11,STX7,TNS1,TUBB,VWF,YWHAB,YWHAQ
lipopolysaccharide		chemical drug	Activated	3.762	bias	9.82e-07	ABCF2,ACADM,ACSL1,ADAR,AKAP2,ALDH2,ANXA5,API5,APOA1,APOA4,APOC2,APOE,ARG1,ASS1,AZU1,BAX,C5,CAPN2,CASP3,CD2AP,CD58,CD59,CD63,CD74,COL12A1,COL3A1,COL4A1,COL4A2,COL5A1,COL6A1,CORO1A,CPB2,CRP,CRTAP,CSPG4,CTH,CYB5A,CYP4A11,CYP4F2,DDX17,DNMT1,EHD1,EHHADH,EIF2AK2,ELANE,EPHX2,F2,FABP5,FBLN2,FGB,FN1,G6PD,GBP2,GCA,GLS,GMFG,GPT,GSN,HMGA1,HMGB1,HMGB2,HNF4A,HSPB1,ICAM1,IGKC,IL16,ITGAL,ITGAM,ITGAV,JCHAIN,KMO,K…	430 (15)
puromycin aminonucleoside		chemical reagent	Activated	2.357	bias	1.08e-06	ANXA2,BAX,CAT,CD2AP,FGA,FGB,GPX2,LCN2,LXN,MRC1,RBM3,S100A10,S100A11,SOD3,TES,TIMP1,TUBB,VIM	156 (7)
BIRC5		other				1.09e-06	BAX,CASP3,CD74,COL3A1,COL8A1,DPT,FBLN1,FMOD,FN1,JCHAIN,LAMA4,VIM,VWF	433 (18)
SMARCB1		transcription regulator		0	bias	1.15e-06	ACSL1,ACTR2,ADD3,COL18A1,CRP,CTTN,CYP4A11,DSC2,EIF2AK2,F10,F11R,FBP1,GSN,KIF11,LBP,MCM2,MCM5,MX1,OAS3,PC,PCK1,POSTN,PRKAB2,SMC4	330 (7)
hexachlorobenzene		chemical toxicant	Activated	2.496	bias	1.35e-06	ANXA2,FGA,FGB,GPX2,LCN2,LXN,MMP9,MRC1,S100A10,S100A11,TES,TIMP1,VIM
triamterene		chemical drug	Activated	2.557	bias	1.36e-06	ANXA2,FGA,FGB,GPX2,LCN2,LXN,MRC1,RBM3,S100A10,S100A11,TES,TIMP1,TUBB,VIM
cardiotoxin		chemical - other		1.633	bias	1.52e-06	ACSL5,APOC2,B2M,CASP3,COL6A2,FEN1,G6PD,IGFBP7,LRRFIP1,LTBP1,MCM2,MCM7,MRC1,MYH9,NASP,NPM1,PCNA,RANBP1,SNX5,STXBP2,TIMP1,TPD52
PPARG		ligand-dependent nuclear receptor		-1.412		1.53e-06	ACAA1,ACAA2,ACADM,ACADS,ACSL1,ACSL4,ACSL5,APOA1,APOE,ARG1,BAX,BDH1,CAT,CTPS1,CYP4A11,EHHADH,F11R,FABP5,FN1,GPT,ICAM1,IGFBP7,LHPP,MCM7,MKI67,MLYCD,MMP9,MRC1,MRTO4,NDRG1,PC,PCK1,PCK2,PCNA,PEA15,PLIN2,PPIC,PYGL,RELA,RHOB,SAP18,SERPINA1,SIRT1,SNX1,TJP1,TUBB,VIM	356 (21)
E2F4		transcription regulator				1.6e-06	ANLN,BUB3,CDC25C,DUOX2,EXOSC9,FEN1,HMGB1,HMGB3,KHDRBS1,MCM5,MKI67,MRTO4,MTHFD1,NAP1L4,NASP,NCL,NPM1,PCNA,PKN2,PRKDC,RANBP1,RBBP4,RPA3,SMC4,SRSF2,STMN1,TMPO,TOP2B
GnRH analog		biologic drug		0.155		1.61e-06	ACAA2,ACOT7,AHCYL1,AP3D1,ASNA1,BUB3,CAPNS1,CASP3,CENPF,CLTA,COL6A1,CRIP2,CYB5A,EML2,FBLN5,FN1,GRB2,HSP90AB1,HSPA2,KYNU,MAPK1,MAPK3,MKI67,NARS,NDRG1,NDUFB5,NME2,PI4KA,RAN,RELA,RPA2,SNRPD3,SRI,SRSF3,TCEA1,UBE2V1
EDN1		cytokine	Activated	2.626	bias	1.64e-06	ANXA4,ANXA5,BAG2,COL4A1,COL5A1,EIF3J,FN1,ICAM1,ITGA2,ITGAM,ITGAV,MMP9,MYL6,NPM1,PLOD1,PRKCD,SF3B2,THBS1,TIMP1,TNC,TPM2,TPM3,UBTF,VCAN,VIM,VWF	462 (15)
phenacetin		chemical drug		1.976	bias	2.04e-06	ANXA2,FGA,FGB,GPX2,LCN2,MRC1,S100A10,S100A11,TES,TIMP1,VIM
fenamic acid		chemical reagent	Activated	2.579	bias	2.39e-06	ANXA2,FGA,FGB,GPX2,LCN2,LXN,MRC1,RBM3,S100A10,S100A11,TES,TIMP1,TUBB,VIM
APP		other		1.48		3.01e-06	AES,ALDOA,ANXA5,APOE,ARF5,ARG1,ATOX1,BAX,CAMK2D,CASP3,CAT,CD59,CD74,CDC37,CFL1,CFL2,CKB,CLIC1,CLTA,COL18A1,CTTN,CUL3,EEF1G,FLNA,FN1,GBP2,GOT2,GRB2,HARS,HBZ,HMGA1,HMGB1,HNRNPA1,HSP90AB1,HSPB1,HSPG2,ICAM1,ITGA2,ITGAL,ITGAM,KYNU,LBP,MAPK1,MECP2,MMP9,MRC1,NDUFB11,NFKB1,PEA15,PFKP,PKM,PRKDC,RAN,RELA,SEPT7,SET,SIRT1,SQSTM1,SSRP1,STMN1,TBC1D4,THY1,TJP1,TOP2B,TPM3,TUBA1C,TUBB,TUBB2A,TUBB4B,VASP,VCAN,YWHAB	359 (14)
CDKN1A		kinase		-1.946		3.49e-06	AIMP1,ANLN,BAX,BUB3,CASP3,CDC25C,CENPF,FN1,HMGB2,HNRNPA2B1,ITGAM,ITGAV,LBR,LIMA1,MCM2,MCM7,MKI67,MMP9,NPM1,PCNA,RACGAP1,RPA3,SMC4,STMN1,TP53I3,VIM,YBX1	423 (19)
calcitriol		chemical drug		-0.962		4.21e-06	ACADSB,ACSL1,AGR2,ANLN,ANXA2,APOA1,BAX,BCAT1,COL4A1,COL4A2,FECH,FEN1,FGG,FN1,G6PD,GLUD1,ITGAM,LCN2,LTBP1,LTF,MCM2,MCM5,MCM7,MMS22L,MRC1,MRPL41,MX1,NASP,NFKB1,NUP37,NUP43,NUP93,PC,PCNA,PDK3,PPIF,PPP1CA,PRKCD,PTCD3,RACGAP1,RELA,RPA2,SARDH,SDSL,SERPINA1,SLC25A6,STMN1,TAGLN2,TAP1,THBS1,TJP1	499 (21)
CXCL12		cytokine		1.865	bias	4.82e-06	BAX,C5,CELF1,FLNA,FN1,HCLS1,HNRNPD,ICAM1,IGFBP7,IRF6,ITGAL,MARCKS,MMP9,PRKCD,RANGAP1,RBM14,RHOC,RPS6KA3,RPS6KB1,RRAS,SEPT7,THBS1,TIMP1,VIM,XRCC5	430 (21)
TP73		transcription regulator		0.43		5.07e-06	AUH,B2M,BAX,CASP3,CDC25C,CNN3,COL18A1,CTH,DIMT1,DTYMK,ELOB,FEN1,FN1,FXR1,G6PD,HSPB8,LDHD,LTBP1,MAPK14,MCM7,MTHFD1,NFKB1,PML,PRKDC,RAN,RTN4,SERPINA1,SFN,STMN1,TAP1,THBS1,THBS2,THY1,TIMP1,TP53I3,TRIM22,TSPYL1,UBE2V1,YBX1,YWHAB	405 (17)
ramipril		chemical drug	Inhibited	-3	bias	5.12e-06	COL3A1,COL4A1,COL4A2,FN1,ITGA2,LAMC1,MAPK14,MMP9,TIMP1
SREBF1		transcription regulator		1.513	bias	5.53e-06	ACACB,ACADS,ACSL1,ACSL4,ACSL5,ADH1C,ALDOA,ATOX1,BAX,CAP2,COL6A1,CSRP1,CYB5A,CYP4F2,EHHADH,FABP5,FN1,G6PD,HNF4A,IFI30,MLYCD,NPC1,PCK1,PCK2,PPCS,RPS27,S100A13,SERPINA1,TM7SF2	379 (17)
fenofibrate		chemical drug	Inhibited	-3.473		5.73e-06	ACAA1,ACAA2,ACACB,ACADM,ACSL1,ACSL4,ACSL5,APOA1,APOC2,CAT,CRP,CYP4A11,ECHS1,EHHADH,FBP1,FGA,FGB,FGG,GOT2,GPX2,GYG1,ICAM1,MLYCD,NFKB1,PCK2,PCNA,PPIC,RELA,SLC27A2,TIMP1	268 (18)
allopurinol		chemical drug	Activated	2.324	bias	6.54e-06	ANXA2,CAT,FGA,FGB,GPX2,LCN2,LXN,MRC1,RBM3,S100A10,S100A11,TES,TIMP1,TUBB,VIM	234 (7)
SRSF1	1.117	other				6.92e-06	FN1,HNRNPH1,LMNA,PTBP1,SRSF1,SRSF2,SRSF6,SRSF7,VIM
HSF1		transcription regulator		-0.804		7.51e-06	AHSA1,B2M,BAX,CBX3,COL18A1,COL6A2,DPT,EFEMP1,FBLN1,FMOD,FXR1,HMGB1,HNRNPA3,HSBP1,HSP90AB1,HSPB1,ICAM1,LAMA4,MRPL18,NFKB1,POSTN,RANGAP1,RELA,SERPINH1,TRA2B,VCAN	327 (11)
MAPT		other				7.84e-06	ALDOA,ANXA5,ARF5,ATOX1,CAMK2D,CASP3,CFL1,CFL2,CKB,CLTA,DPYSL3,EEF1G,GOT2,HBZ,MAPK1,MAPK3,MMP9,NFKB1,PEA15,PKM,PPA1,SEPT11,SQSTM1,STMN1,THY1,TOP2B,TPM3,TUBA1C,TUBB,TUBB2A,TUBB4B	326 (12)
17-alpha-ethinylestradiol		chemical drug		0.999		8.42e-06	ADGRE5,APOA4,APOC2,APOE,BCAT1,CD74,CKB,CTSS,DSC2,EIF2S2,FBLN2,IFI30,ISYNA1,LCN2,MANF,MMP9,MRC1,PCNA,SERPINH1,SFN,TRA2B	487 (15)
2-bromoethylamine		chemical reagent	Activated	2.137	bias	1.03e-05	ANXA2,GPX2,LCN2,LXN,MRC1,RBM3,S100A10,S100A11,TIMP1,TUBB,VIM
FLT1		kinase		1.069		1.08e-05	ACTR2,BCAT1,CAPN2,EIF2S3,EIF4B,FLNA,G3BP2,ICAM1,MARCKS,PTBP1,RBBP4,THBS1,TOMM22,VWF	253 (7)
CD3		complex	Activated	3.791	bias	1.11e-05	ACADS,AHCYL1,AIMP1,ANAPC1,AZU1,C2,CASP3,CD74,CENPF,CORO1A,CUL4A,DOCK2,G6PD,GLDC,H2AFY,HGS,HNRNPA1,HNRNPA2B1,HNRNPR,ICAM1,IGLL1/IGLL5,IL16,ILF2,LSP1,LTBP1,MAPK1,MCM5,MRPL11,NASP,NCL,NFKB1,NPM1,PCNA,PFN1,PLIN2,POLR2A,POLR2B,PPA1,PYGL,RBM3,RHOC,S100A11,SMS,SRP14,SRSF1,SRSF7,STMN1,TCEA1,THBS1,THY1,TMPO,TRA2A,UBE2V1,VBP1
glutamine		chemical - endogenous mammalian		0.617		1.2e-05	ADSS,ASS1,BCAT1,EIF2B4,FABP5,FN1,GCDH,HSBP1,ICAM1,PCK1,PCK2,PCNA,SRSF1,SRSF2,THBS2,VIM	395 (21)
CR1L		other	Inhibited	-2.985	bias	1.22e-05	COL18A1,COL3A1,COL4A1,COL4A2,COL5A1,COL6A1,COL6A3,COL8A1,TNC
FN1	1.622	enzyme	Activated	2.805	bias	1.25e-05	ACTR2,APOE,BCAT1,CAPN2,CORO1A,CRP,EIF2S3,EIF4B,FLNA,FN1,G3BP2,ITGAM,ITGAV,MARCKS,MMP9,PCNA,PTBP1,RBBP4,SDCBP,SQSTM1,THBS1,TOMM22,U2AF2,VIM,ZYX	397 (16)
let-7a-5p (and other miRNAs w/seed GAGGUAG)		mature microRNA	Inhibited	-4.47	bias	1.26e-05	ANAPC1,CAPG,CASP3,COL3A1,DHX57,DICER1,DUSP23,EIF3J,EIF4G2,F2,HMGA1,MMP9,PRRC2A,RHOB,RHOG,SLC25A24,SMC1A,SYPL1,THBS1,TPM2,VIM	304 (10)
diethylnitrosamine		chemical toxicant		0.198		1.36e-05	CASP3,CD63,CELF1,COL3A1,CYP4A11,DCLK1,HNF4A,LCN2,LHPP,NFKB1,PAH,PCNA,RELA,SIRT1,THY1,TIMP1	352 (15)
PGR		ligand-dependent nuclear receptor	Activated	4.214	bias	1.37e-05	ACSL1,AHCYL1,CAPN2,CD59,COL6A1,COL6A2,CSRP1,FKBP5,FN1,GLS,HPCAL1,HSPA2,ICAM1,MAP2K3,MVP,NDRG1,NPC1,NT5C2,PCNA,PFKP,POSTN,PPIF,RHOC,SERPINA1,SRSF7,TGFBI,TNC,URB2,VASP,VCAN	425 (19)
PD98059		chemical - kinase inhibitor	Inhibited	-3.247	bias	1.42e-05	ACOT7,ALDOA,APOA1,BAX,BDH1,CASP3,CD74,CDC25C,COL3A1,COL4A1,CRP,CTSH,DES,DNMT1,FKBP5,FN1,GFPT1,GTF2I,HMGB3,HNRNPA2B1,HPCAL1,ICAM1,ITGA2,ITGAM,ITGAV,LAMA5,LPGAT1,MAPK1,MAPK3,MKI67,MMP9,NOP56,NPC1,NQO1,PC,PCK1,PCNA,POSTN,RAN,RELA,S100A10,SEC14L2,SERPINA1,THBS1,TIMP1,TOMM40,TUBB2A,VCAN,VIM	385 (17)
phenylbutazone		chemical drug	Activated	2.314	bias	1.46e-05	ANXA2,FGB,GPX2,LCN2,LXN,MRC1,RBM3,S100A10,S100A11,TIMP1,TUBB,VIM
RPS15		other	Inhibited	-2.111	bias	1.55e-05	EIF2S2,EIF2S3,EXOSC9,FEN1,MCM2,MCM5,MCM7,PCNA,RPA1,RPA2,RPA3	106 (5)
FHIT		enzyme	Inhibited	-2.975	bias	1.59e-05	IPO7,MMP9,RAB1A,RAB31,RAB6C/RAB6D,RAN,RANBP1,RHOC,VIM
sunitinib		chemical drug		-1.199	bias	1.74e-05	COL4A2,COL5A1,COL6A1,COL8A1,ECM1,FN1,ICAM1,ITGAL,LAMC1,MMP9,TGFBI,TNC	379 (16)
ANGPT2		growth factor		1.769	bias	1.76e-05	APIP,CASP3,CAT,COL18A1,COL3A1,DBNL,EPHX2,FEN1,FN1,HSPA2,ICAM1,LMNB2,MFGE8,MMP9,POSTN,RAD21,RBM14,RHOB,RPA2,RPA3,SOD3,THBS1,THBS2,VIM	344 (16)
CDK4/6		group		0.277		1.77e-05	AHNAK,BCLAF1,ERBIN,FAM120A,FAM129B,FLNA,HSPB1,ITSN2,MARCKS,NOP58,PKP4,TUBA1C,TUBB
COL9A1		other	Inhibited	-2.425		1.99e-05	COL12A1,FMOD,FN1,HSPG2,MFGE8,TGFBI
PFDN6		other		1.964	bias	2.11e-05	PFDN1,PFDN2,PFDN5,VBP1
indomethacin		chemical drug	Activated	2.114		2.18e-05	ACSL1,ANXA2,BAX,CAPN2,FGA,FGB,GBA,GPX2,IFITM3,ITGAM,LCN2,LIMA1,LXN,MANF,MRC1,PCNA,PLIN2,RBM3,S100A10,S100A11,TES,TIMP1,TJP1,TUBB,VCAN,VIM,XRCC5	365 (18)
APOE	1.514	transporter		-0.096	bias	2.21e-05	ACSL1,APOA1,APOE,BAX,BCAM,C2,CAPNS1,CASP3,CAT,COL18A1,CSRP1,CTSS,ECM1,FKBP5,HPCAL1,HSD11B1,HSP90AB1,HSPG2,ICAM1,ITGAM,LCN2,LTBP1,MAP2K3,MAPK14,MMP9,MYBBP1A,PC,PEA15,RELA,SIRT1,THY1,TIMP1,ZYX	384 (16)
SMYD1		transcription regulator				2.29e-05	AGL,BDH1,GOT2,IDH3A,NT5C2,OGDHL,PFKM,PKM,PYGL,PYGM,SDHA
D-glucose		chemical - endogenous mammalian	Activated	4.27		2.31e-05	ACAA1,ACAA2,ACADM,ACSL1,ALDOA,ANLN,ASS1,BAX,BCAT1,CASP3,CAT,CD59,CNN1,COL3A1,COL4A1,DES,DNAJC3,EIF2A,EIF2B4,FABP5,FBP1,FN1,G6PD,GCDH,GFPT1,GSN,HMGB1,HNF4A,HNRNPK,HSPB1,ICAM1,LAMC1,MMP9,MYL9,NQO1,PARP1,PC,PCK1,PCK2,PCNA,PFKM,PFKP,PGM1,PKM,PLIN3,RELA,SIRT1,SQSTM1,SRM,SRSF1,SRSF2,TAGLN2,THBS1,TIMP1	432 (23)
OGA		enzyme	Inhibited	-2.431		2.58e-05	ACADM,ACSL4,ADRM1,AHNAK2,APOC2,APOE,ASS1,BAX,CIAPIN1,CNN1,CYP4F11,DCLK1,EIF2A,EPS8,FBLN1,FBP1,FLNA,FLNB,FN1,G6PD,GALNT7,GSN,HSP90AB1,IDH3A,IGFBP7,ITGA2,NDUFB11,PFKM,PLIN2,PLIN3,PYGL,RAB27A,RHOB,RPS6KA3,TGFBI,THBS1,TIMP1,TNC,VIM	369 (13)
semaxinib		chemical drug		0.192		2.63e-05	ARG1,CASP3,LCN2,LTF,MMP9,PARP1,PCNA,THBS1,VWF	371 (16)
TP63		transcription regulator		1.337	bias	2.69e-05	ACTL6A,ADRM1,AGR2,ARG1,ATG3,BAX,CAD,CASP3,CDC25C,COL4A1,COL4A3,COL5A1,CSTA,DICER1,DNMT1,FN1,FUBP1,G6PD,GPX2,IGFBP7,ITGA2,KHSRP,MAP2K3,MFGE8,MKI67,MLPH,MRPL41,PCNA,POSTN,PRPF4,RACGAP1,RELA,RPA1,SFN,STMN1,THBS1,THY1,TNC,TP53I3,VIM	406 (17)
PPARGC1A		transcription regulator	Inhibited	-3.293		2.87e-05	ACACB,ACADM,APOA4,APOC2,ASPN,BAX,BDH1,C2,CAT,COL6A2,COL6A3,DPT,FBLN1,FBLN2,GOT2,IDH3A,IGFBP7,IMPA1,LAMA4,MCM5,NCEH1,NDUFB5,NDUFB8,PCK1,PCK2,PLIN2,POSTN,SDHA,SERPINH1,SLC39A14,THY1,TIMP1,TXNRD2,VCAN	378 (15)
lomustine		chemical drug	Activated	2.887	bias	2.89e-05	ANXA2,FGA,FGB,LCN2,LXN,RBM3,S100A10,S100A11,TES,TIMP1,TUBB,VIM
CD44		other	Activated	2.598	bias	3.11e-05	BCAM,CD63,COL18A1,COL3A1,COMMD3,CTTN,DNMT1,ECM1,FKBP5,FN1,HSP90AB1,ITGAV,LAMC1,LTBP1,MMP9,MYBBP1A,NECAP2,SERPINA1,SRC,THBS1,THBS2,THY1,VIM,ZYX	431 (15)
1,2-dithiol-3-thione		chemical reagent	Activated	2.949	bias	3.11e-05	ACAA1,ACSL5,AKR1B10,ALDOA,APOA4,BHMT,C5,CLPTM1L,DNAJC3,EIF4G2,EPB41,F10,FKBP5,HM13,HSP90AB1,LMNA,NARS,NCKAP1,NQO1,PCBP1,RAN,RBBP7,RUVBL1,S100A13	38 (2)
carboplatin		chemical drug	Activated	2.714	bias	3.3e-05	CASP3,FGA,FGB,GPX2,LCN2,LXN,MRC1,RBM3,TIMP1,TUBB,VIM
uranyl nitrate		chemical toxicant		1.565		3.61e-05	ACADS,ADH1C,AIMP1,CD74,CSRP1,FBP1,GLUD1,HNRNPA2B1,IGFBP7,NDRG1,NME2,RIDA,SLC27A2,SQSTM1,TAGLN2,TUBA1C
cisplatin		chemical drug	Activated	3.262		3.91e-05	AADAT,ACADM,ADRM1,AGXT2,AHNAK2,ANXA2,ANXA4,ANXA5,BAX,C11orf96,CAPN2,CASP3,CAT,CROCC,DICER1,ESYT2,F11R,FGA,FGB,FN1,G6PD,GMDS,GMFB,GOT2,GPX2,HAO2,HMGB1,ICAM1,ISCU,ISYNA1,LBP,LCN2,LMNA,LXN,MARCKS,MRC1,MX1,NQO1,PARP1,PGM1,RAB8B,RABGAP1,RBM3,RELA,RPL13A,S100A10,S100A11,SIRT1,STMN1,TAP1,TES,THBS1,TIMP1,TM7SF2,TP53I3,TPM2,TRIM22,TUBB,VIM,VPS54,YBX1	456 (17)
MAPK1	1.58	kinase		0.452		4.06e-05	ADAR,ADH1C,APOE,CAPN2,CSTA,DNMT1,EHD1,EIF2AK2,ENO3,EXOC2,FN1,GBP2,GLS,IFITM3,IGFBP7,ITGAV,LAMA4,LMNA,MAPK3,MECP2,MKI67,MMP9,MVP,OAS3,PDLIM3,PML,SIRT1,SUN2,SUOX,TAP1,TJP1,TRIM22,UBE2I,VIM	470 (18)
Brd4		kinase	Activated	2.646	bias	4.28e-05	COL3A1,COL4A1,COL4A2,COL4A3,COL6A3,COL8A1,HNRNPH1,PTBP1,SRSF6,TIMP1
NRAS		enzyme		-1.498		4.39e-05	ACADM,AGRN,ANXA4,B2M,BAX,BUB3,CDC25C,FBLN2,FN1,GBP2,ITGA2,JCHAIN,LBP,LCN2,LSP1,MKI67,NQO1,PON3,RHOB,SARDH,TAP1,TMEM43,TUBB2A	394 (20)
F2	1.108	peptidase	Activated	4.189	bias	4.4e-05	ALDH1B1,BAX,CAD,CASP3,CD63,CLIC1,COL4A1,CTPS1,EHD4,EPB41,FN1,HMGA1,ICAM1,LMCD1,MAPK3,MMP9,MYH9,NUP62,PPIF,RHOB,SRM,TAGLN2,TAP2,THBS1,TOMM40,TXNRD2,VASP,VWF	432 (18)
ciprofloxacin		chemical drug		0		4.54e-05	ACAA1,ACSL5,ALDH2,CPNE1,DNAJC3,GBA,GLUD1,ICAM1,ITGAL,MAPK1,MFGE8,MYBBP1A,PKN2,RUVBL1,TMPO,VIM
IL3		cytokine		1.405	bias	4.79e-05	ADGRE5,ALDH2,ARG1,CASP3,CAT,CD63,CIAPIN1,COPS4,CTTN,EIF2AK2,FUS,GP5,HBZ,HNF4A,HNRNPA2B1,HSPA2,ICAM1,ITGAM,ITGAV,JCHAIN,LCN2,MAN2B1,MCM5,NARS,NCL,PPP5C,RAN,RANBP1,RBM3,RIDA,TPD52,VASP,YBX1	369 (13)
CYP1A1		enzyme		1.91		4.86e-05	ANXA4,BANF1,CBX3,CHP1,CNN2,CTTN,GPT,LMNA,LMNB2,NQO1,PFDN1,PRPH,RACGAP1,RBBP4,TMPO
CD38		enzyme	Activated	2.426	bias	4.91e-05	ALDOA,ANXA2,ASS1,CRIP1,EPS8,FN1,GBP2,ICAM1,IFI30,JCHAIN,MANF,NDRG1,PFKP,PGM1,PKM,SCEL,SDF2L1,THY1,UPB1,VIM	356 (17)
dihydrotestosterone		chemical - endogenous mammalian	Activated	2.231	bias	5.23e-05	ADH1C,AES,ALDOA,APOE,B2M,BAX,CACYBP,CASP3,CD63,CD74,COL3A1,COL4A1,COL6A1,CYP4A11,FKBP5,FN1,GSN,GTF2I,HNRNPU,HSPB1,IGFBP7,ITGA2,LAMA5,LTBP1,MCM5,MMP9,NDRG1,NEDD4L,NID2,PC,PCK1,PEA15,PFN1,POSTN,RAB27A,RAD21,RELA,RHOB,RPL37A,RPL8,SOD3,SRGAP2,SSRP1,THBS1,VCAN,VIM,VPS54	454 (19)
HMGA1	5.108	transcription regulator		-0.193		5.24e-05	B2M,COL4A1,COL4A2,CSK,CTSH,GSN,HBZ,IGFBP7,ITGAL,MGAT1,MMP9,MVK,RAN,RHOB,SERPINH1,SLC27A2,SOD3,TRIM28,ZYX	358 (11)
FOXO1		transcription regulator		0.789		5.59e-05	ACSL5,ANLN,BAX,CAT,CENPF,COL4A1,COL4A2,FABP5,FLNB,FMOD,FN1,GPD2,GRHPR,HPD,HSP90AB1,ICAM1,IGFBP7,IGLL1/IGLL5,IKZF1,ITGAM,ITGAV,KIF11,MCM5,MMP9,MRPL14,MRPS2,MRPS22,NDUFAF4,NPC1,PCK1,PCK2,PRKCD,RELA,RPS6KA3,SFN,SIRT1,SLC25A24,THBS1,TOMM40	422 (21)
VCAN	3.058	other		-0.577		5.85e-05	AEBP1,AGRN,APOE,ASS1,CASP3,CD59,FABP5,FBLN5,FN1,ICAM1,LBP,LCN2,MMP9,MX1,NFKB1,OAS3,SPATS2L,TIMP1,TRIM22,VCAN	410 (20)
PFDN5	2.844	transcription regulator		1.929	bias	6.09e-05	BAX,PFDN1,PFDN2,VBP1
EFEMP2		other				6.09e-05	EFEMP1,FBLN2,FBLN5,MMP9
SF1		transcription regulator		-0.117		6.09e-05	CNN1,FN1,ICAM1,MYL6
RAF1		kinase		1.897	bias	6.17e-05	ACOT7,CD74,CRP,CSTA,CTSH,HMGB3,HNRNPA2B1,HPCAL1,HSPB1,ITGA2,ITGAM,LPGAT1,MKI67,MMP9,NFKB1,NOP56,NQO1,PC,PCK1,RAN,SEC14L2,TIMP1,TOMM40,TUBB2A	410 (16)
carbon tetrachloride		chemical toxicant	Activated	2.834	bias	6.17e-05	APOA1,APOE,ASS1,BAX,BCKDHA,CASP3,CAT,COL3A1,CPS1,DCLK1,DES,FGG,FN1,GLUD1,HSPB1,ICAM1,MAPK14,MAPK3,MMP9,NDRG2,NQO1,PCNA,RAB13,TIMP1	440 (16)
SNAI1		transcription regulator		1.414		6.3e-05	ACTR2,CFL1,CFL2,CTTN,DPYSL3,ESPN,FLNA,FLNB,FN1,GSN,HNF4A,ITGA2,LIMA1,MMP9,PFKP,SLC27A2,THY1,TPM3,VASP	433 (10)
tetraethylammonium		chemical drug		-0.333		6.47e-05	BAG2,CBX3,EFHD2,HNRNPC,HSPB1,POTEE/POTEF,RANBP1,SRI,TBCB
phosphate		chemical - endogenous mammalian		0.535		6.48e-05	ACADSB,BLVRA,COL5A1,CPNE1,ECM1,ENPP1,MAP2K3,NPM1,PCNA,POSTN,PRPF31,RHOC,SDF2L1,TIMP1	266 (7)
HOXA9		transcription regulator				6.89e-05	ADD3,AHCYL1,ARPC5,CDC37,CELF1,CPB2,CTH,ENPP1,EPS8,FXR1,GTPBP1,HBZ,HNRNPU,OSBPL8,PABPN1,RAB31,RPL37A,SDCBP,SRP72,TPR,VIM
phytohemagglutinin		chemical drug	Activated	3.295	bias	6.92e-05	ALDH2,AMT,APOC2,C5,C6,C8B,CAP2,CASP3,CAT,COL18A1,CPS1,DHX9,DRG2,GPD2,ICAM1,IDH3A,LBP,MMP9,NEDD8,NFKB1,NOP56,PCNA,PRPF4,PTPN1,RPA1,SRP14,SRSF1,TIMP1,TK2,TMPO	427 (17)
CCND1		transcription regulator		1.077		7.1e-05	AHNAK,BCLAF1,C7,CENPF,DNMT1,EPS8,ERBIN,FAM120A,FAM129B,FLNA,HSPB1,HSPB8,ITGAV,ITSN2,KIF11,MARCKS,MCM7,NOP58,PAH,PBLD,PCNA,PDLIM3,PKP4,PPCS,PTBP3,RACGAP1,SRGAP2,THNSL1,TM7SF2,TUBA1C,TUBB,VPS54	333 (7)
RCE1		peptidase				7.96e-05	AEBP1,B2M,CRIP1,LMNA,LMNB2,PLIN2,S100A13,TGFBI,THBS2
progesterone		chemical - endogenous mammalian		0.299		8.02e-05	ACOT7,ACSL1,AEBP1,APOE,BAX,BCAT1,CASP3,CDC25C,DICER1,ENPP1,FEN1,FKBP5,FMO5,FN1,G6PD,GARS,HSD11B1,HSPA2,ICAM1,ITGA2,LCN2,LTF,LXN,MAP2K3,MCM2,MCM5,MCM7,MKI67,MMP9,MRC1,MYO1D,NDRG1,NDRG2,NME2,NPC1,NT5C2,PCK1,PCNA,PDK3,PDXDC1,PKM,POSTN,PTBP3,RTN4,SFN,SRSF7,TGFBI,TIMP1,URB2,VIM	347 (17)
PPARD		ligand-dependent nuclear receptor		0.14		8.24e-05	ACAA1,ACAA2,ACACB,ALDH2,APOA1,APOA4,APOE,FBP1,FN1,GOT2,GPD2,ICAM1,LGALS4,MAPK1,MAPK3,MFGE8,MLYCD,MMP9,PCNA,PLIN2,RABL6,SIRT1,SLC27A2,THBS1	335 (18)
CUX1		transcription regulator				8.97e-05	CAD,ELANE,FLNA,HIST1H1B,LIMA1,LTF,MARCKS,PNN,RACGAP1,THBS1,VIM
RXRG		ligand-dependent nuclear receptor				9.39e-05	ACAA2,ACADM,ACSL1,APOA1,CYP4A11,EHHADH,FABP5,PCK1
YY1		transcription regulator		-0.277		9.49e-05	API5,CAPG,CBX3,CDC25C,EIF4G2,FEN1,HNRNPC,IGLL1/IGLL5,JCHAIN,KIF11,KIF5B,LMNB1,LUC7L2,MCM5,MCM7,MKI67,PCNA,PTBP3,RAB8B,RAD21,RBBP4,RELA,SRC,SRSF1,SRSF5,TGFBI,TRA2A,VWF	411 (15)
Eotaxin		group				9.58e-05	ITGAM,MAPK1,MAPK3	258 (7)
ochratoxin A		chemical toxicant		1.298		9.62e-05	BAX,CASP3,COL3A1,DSC2,MMP9,NQO1,TIMP1	87 (4)
SCAP		other		-1.554	bias	9.7e-05	ACAA2,ACACB,ACSL1,ACSL4,ACSL5,C5,CYB5A,CYP4F2,EHHADH,FABP5,FLAD1,MVK,TM7SF2	226 (6)
cyclosporin A		biologic drug		1.461		0.000105	ANXA2,APOE,BAX,BCAT1,CASP3,COL4A2,FGA,FGB,FKBP5,FLNA,FN1,GNPDA1,GPX2,HNF4A,ICAM1,IL16,ITGAL,ITGAV,LBR,LCN2,LXN,MMP9,MRC1,NFKB1,PCNA,PKM,POSTN,RAB11B,RBM3,S100A10,S100A11,SDCBP,SERPINH1,SRP14,SRSF1,TIMP1,TRA2A,TUBB,VIM	463 (19)
Esrra		transcription regulator		0.577		0.000107	ACADM,ACSL5,AGL,ALDOA,APOA4,BDH1,ENO3,FBP1,IDH3A,PCK1,PCK2,PGM1,PPA1,PYGL,PYGM	278 (7)
fulvestrant		chemical drug		-0.837		0.000111	ACOX2,AIMP1,APOA1,BAX,CD74,CENPF,FEN1,FNTA,G6PD,HSD17B7,ICAM1,KIF11,LTF,MANF,MAPK1,MAPK14,MCM2,MCM5,MCM7,MTHFD1,NSUN2,PCNA,PPME1,RBM14,SQSTM1,STMN1,USP19	434 (22)
GABPA		transcription regulator	Activated	2	bias	0.000118	ELANE,IL16,LBR,NQO1,PRKDC,RRAS,SOD3,TNC,XRCC5
HGF		growth factor		1.586	bias	0.000122	ANP32A,ARPC5,BAG2,CDC25C,CENPF,COL3A1,COL4A1,CUL3,DES,DKC1,DTYMK,FAM3C,FEN1,FKBP5,FLNA,FN1,GBA,ICAM1,ITGA2,KIF11,KRR1,LCN2,MAP2K3,MAPK14,MCM2,MCM5,MKI67,MMP9,NFKB1,NID2,NPC1,PCK1,PCNA,PLOD1,PRKDC,RHOB,SF3B4,TAGLN2,THBS1,TIMP1,TJP1,VIM	428 (20)
AHR		ligand-dependent nuclear receptor	Inhibited	-3.382		0.000129	ACTL6A,AFMID,ALDH1B1,ALDH2,ASPN,BAX,CDC25C,COL12A1,COL3A1,COL4A1,COL4A2,COL5A1,COL6A1,COL6A3,CRP,EFEMP1,EHD1,FBLN2,FBLN5,FN1,GHITM,ITGAM,LBP,LTBP1,NID1,NID2,NQO1,PCK1,SDSL,SIRT1,TGFBI,THBS1,VIM	439 (18)
cigarette smoke		chemical toxicant		1.909	bias	0.000129	AKR1B10,CASP3,CAT,CDC25C,CKB,COL4A2,DICER1,DNMT1,FABP5,G6PD,GPX2,GRB2,ICAM1,MAP2K3,MMP9,MX1,NFKB1,NQO1,OAS3,PTPN1,RELA,SIRT1,SOD3,SQSTM1,TIMP1,USP19	409 (17)
PC-SPES		chemical drug				0.000132	B2M,COL4A2,DCTN3,DTYMK,GARS,LAMC1,MCM2,MCM5,MYL6,PEA15,RAN,SDHA,TUBB2A,VIM
MMP12		peptidase				0.000141	ACTR2,HNF4A,KIF5B,MAP4,MAPRE1,MMP9,MYH9,PGM1,PKM,PSME3,TPM3	77 (3)
exenatide		biologic drug		-0.651		0.000147	ARG1,BAX,CASK,ICAM1,ITGAM,MMP9,MRC1,SIRT1	423 (20)
EPHA2		kinase		-0.397		0.000147	BAX,CASP3,MAPK1,MAPK3,MMP9,TJP1	386 (19)
RRP1B		transcription regulator				0.000147	CASP3,CDC25C,EIF3H,EIF4B,FEN1,HSP90AB1,KIF11,MCM2,MCM5,PCNA,PRKCD,RPA1,RPA2,RPL13A,RPL37A
VEGFA		growth factor	Activated	2.322	bias	0.000155	ACADM,ACSL1,ALDH2,ANP32A,BAX,CASP3,CDC25C,CTSS,FN1,HBZ,ICAM1,ITGA2,ITGAV,LMNA,ME2,MKI67,MMP9,MVP,NME2,PARP1,PCNA,PPA1,PRPF6,SET,SLC25A6,THBS1,TIMP1,TNC,TOMM22	383 (17)
nocodazole		chemical reagent		0.785		0.000159	BMX,CSK,CSNK2B,FLNA,KHDRBS1,MAP4K2,MAPK1,MAPK3,PPP1CA,PPP5C,PTPN1,RPS6KB1,SRC	326 (9)
ST1926		chemical drug	Inhibited	-4.359	bias	0.000162	CFL1,CLIC1,EIF4B,EIF4G2,FKBP5,ILF2,NARS,NOP10,NPM1,PFN1,RPL8,RPS27,SAP18,SEPT7,SLC25A6,SNRPF,SRP72,SRSF3,YBX1
miR-30c-5p (and other miRNAs w/seed GUAAACA)		mature microRNA	Inhibited	-2.36	bias	0.000163	F2,GALNT7,GPD2,HNRNPM,ITGA2,LMNB2,NCEH1,NCL,PGM1,PRPF40A,SLC9A3R2,STX7,SYPL1,TMCO1,UBE2I
captopril		chemical drug		1.732		0.000165	EPHX2,FGA,GPX2,LCN2,MMP9,MRC1,MYO6,POSTN,RBM3,S100A10,S100A11,TIMP1	310 (13)
methylmercury		chemical toxicant		0.47		0.000187	BAX,CASP3,CD63,CHP1,COL3A1,MFGE8,NCKAP1,NFKB1,RHOB,RTN4,YWHAQ	163 (8)
LONP1		peptidase	Inhibited	-2		0.000187	ACADS,ANXA2,GARS,GLUD1,HNRNPA2B1,HSPB1,IDH3A,MRPL18,MRPS22,PFN1,S100A11,TPM3
mifepristone		chemical drug		-0.437		0.000193	APOE,ARG1,BAX,BCAT1,CASP3,CD74,COL18A1,FBLN2,FKBP5,HSD11B1,ICAM1,ITGA2,ITGAM,LAMA5,LTF,MMP9,NDRG1,NME2,PC,PCNA,POSTN,RELA,RHOB,RHOC,SRM,STXBP2,THBS2,VCAN	438 (21)
FOS		transcription regulator	Activated	2.021		0.000202	AGPS,ANXA4,AP3D1,ARPC5,C5,CAMK2D,CAPN2,CASP3,CAT,COL18A1,COL6A1,CSTA,CTH,CTSH,DNMT1,EIF4G2,EPHX2,EPS8,FGA,FN1,GBA,HDAC6,HSPB8,ICAM1,KIF5B,LGALS4,LTBP1,MCM5,MMP9,MYH9,NAE1,NQO1,PFN1,RBBP4,RBBP7,S100A10,SAP18,STMN1,TCEA1,TGFBI,TIMP1,TPD52,TRAPPC3,TUBB,VIM	372 (14)
miR-296-5p (miRNAs w/seed GGGCCCC)		mature microRNA		-1.664	bias	0.000202	BAX,HGS,HMGA1,MAP2K3,PCNA,TNC
TFAM		transcription regulator		-1.633	bias	0.000202	ACADM,ACADS,AUH,ECHS1,FABP5,PFKP
AGN194204		chemical drug		1.229	bias	0.000206	ACAA1,ACAA2,ANXA2,CAMK2D,CSRP1,CYB5A,ENO3,EPB41,GBP2,GNB2,HIST1H1C,IFITM3,LMNA,MKI67,MMP9,PLIN2,SMC4,TAP1,TIMP1	326 (7)
HTT		transcription regulator	Activated	2.902		0.000212	ACADM,AGRN,ALDOA,APOA1,APOE,ATPAF2,B2M,CASP3,CD74,COL18A1,COL4A1,COL4A2,COL6A1,COL6A3,CTTN,DBNL,DNAJC3,EMC8,ENO3,FN1,GSN,HMGA1,HMGB2,HPCAL1,HSP90AB1,HTRA2,LTF,NDUFB8,NEDD8,OSBPL8,PC,PCNA,PDK3,PEA15,PFKM,PFN1,PLOD3,POLR2A,PPP5C,PRKCD,PTBP1,RELA,SDHA,SERPINA1,SERPINH1,SLC12A2,SQSTM1,SRM,SRSF2,STMN1,TGFBI,THBS2,TUBB,YBX1	430 (19)
CCL5		cytokine	Activated	2.173	bias	0.000212	ADGRE5,CAPN2,CDC37,HMGA1,ITGAM,MAPK1,MAPK3,MMP9,PPIF,THBS1,TUBB4B,VASP	335 (18)
BRD4		kinase		1.054	bias	0.000213	ACSL5,ACSM3,ALDH1B1,BDH1,COL4A1,COL5A1,DCPS,FN1,HS1BP3,ICAM1,IGLL1/IGLL5,NQO1,SRM,THBS1,THBS2,TIMP1,TUBB
IGF1		growth factor		1.486	bias	0.000215	ABCF2,BAX,CASP3,CNN1,CNP,COL3A1,DCLK1,EIF2AK2,EIF4B,FN1,GPD2,HMGA1,HSD11B1,ICAM1,IFITM3,IL16,ITGAV,LCN2,MAPK1,MAPK3,MKI67,PARP1,PCK2,PCNA,PKM,RELA,SFN,SIRT1,SRM,SRSF3,TAP1,TAP2,TGFBI,THBS1,THY1,TJP1,TOMM40,TPM3,UBTF,VIM	483 (20)
NORAD		other	Activated	2.121	bias	0.000222	COL4A1,COL4A2,COL5A1,COL6A2,LMCD1,RHOB,SEC14L2,THBS1
THBS1	2.904	other		-0.174		0.000222	COL3A1,COL4A1,FN1,LAMA4,MMP9,PARP1,THBS1,TIMP1	314 (17)
RB1		transcription regulator		-1.869		0.000226	BAX,BCKDHA,CASP3,CDC25C,DEK,DNMT1,EHD3,EPS8,FEN1,FN1,GHITM,HAUS1,HIST1H1B,HMGB2,HSBP1,KANK2,LACTB,MAP2K3,MAPK1,MAPK3,MCM2,MCM5,MCM7,MLYCD,MRPL11,MRPL12,MRPL53,NDUFB8,PARP1,PCNA,RAB27A,RANBP1,RPS6KB1,RSL1D1,SAFB,TMPO,TOMM22	430 (17)
IRF2		transcription regulator		-0.149	bias	0.00023	ARG1,B2M,CLIC1,CTSS,CYP4F11,EIF2AK2,FCGBP,FGA,FGB,FGG,LBP,LCN2,MYH9,TAP1,TAP2,TAPBP	310 (12)
IFNG		cytokine	Activated	4.007		0.000231	AGRN,ALDH1L1,ARG1,ASS1,ATG3,B2M,BAX,BST1,C2,CASP3,CAT,CD63,CD74,CIRBP,CORO1A,CSK,CTSH,CTSS,CYB5A,DHX9,DUOX2,EIF2AK2,F11R,FABP5,FBLN1,FBP1,FCN1,FECH,FGG,FKBP5,FLAD1,FN1,GBP2,GLS,GNL1,GPT,GSDMD,HIP1,HMGA1,HMGB1,HSP90AB1,HSPB1,HSPG2,ICAM1,IFI30,IFITM3,ITGAL,ITGAM,ITGAV,KMO,KYNU,LAMC1,LCN2,MAPK14,MMP9,MNDA,MRC1,MX1,MYH9,NFKB1,NQO1,OAS3,OPTN,PCK1,PEA15,PKM,PML,PPP5C,PRKCD,PSME3,PTGES2,PTPN1,RAB27A,RBB…	415 (16)
NFE2L2		transcription regulator	Activated	3.051	bias	0.000236	ACSL5,AKR1B10,ALDOA,APOA4,BHMT,C5,CAT,CLPTM1L,COL3A1,COL4A2,DCTN3,DNAJC3,EIF4G2,EPB41,F10,FKBP5,FN1,G6PD,GPX2,HM13,HSP90AB1,ICAM1,LMNA,MMP9,NARS,NCKAP1,NQO1,PCBP1,PLIN2,PTPN1,RAN,RBBP7,RELA,RUVBL1,S100A13,SOD3,SQSTM1	328 (13)
DYSF		other				0.00024	ACOT9,ANXA2,B2M,CD74,CTSH,CTSS,FN1,HSPB1,IDH3A,MRC1,S100A13,TIMP1
TO-901317		chemical reagent		0.85		0.000241	ACAA1,ACSL1,ACSL5,ADH1C,ALDH2,APOC2,APOE,ASS1,C5,CRP,CYP4A11,EHHADH,FABP5,FBP1,FMO5,G6PD,HSD11B1,MMP9,MRPS2,PCK1,PFKP,SIRT1,SLC27A2,TIMP1	412 (19)
SPDEF		transcription regulator	Inhibited	-2.352	bias	0.000246	COL4A1,COL4A2,COL5A1,COL6A1,COL6A2,COL6A3,LAMC1,SQSTM1,TNC,VASP,VIM	321 (7)
poly rI:rC-RNA		biologic drug		1.694	bias	0.000246	ADAR,AGRN,B2M,BAX,C2,CD74,CNP,CRP,CYP4F2,EEF1G,EIF2AK2,EIF2S3,ELANE,FCN1,FN1,GBP2,ICAM1,IFITM3,ITGAM,KMO,KYNU,LTF,MBL2,MKI67,MMP9,MVP,MX1,NFKB1,OAS3,PCK2,PRKCD,PSIP1,RELA,SFXN2,SRSF2,SUOX,TAP1,TAP2,THBS1,TP53I3,VASP,VIM,VPS54	415 (15)
TNF		cytokine	Activated	2.602		0.000251	ACADM,ACADS,ACSL1,AEBP1,AIMP1,AKR1B10,ALDH2,APOA1,APOC2,APOE,ARG1,ASS1,AZU1,B2M,BAX,BCKDHA,BCKDHB,BLVRA,C5,CASP3,CAT,CD59,CDC25C,CNN1,CNP,COL3A1,COL4A3,CRP,CTSS,CTTN,DNMT1,DSC2,EFHD2,EHD1,EIF2AK2,F11R,FABP5,FGG,FN1,GBP2,GLS,GNL1,GOSR2,GPD2,GSDMD,HEXB,HMGB1,HNF4A,HSD11B1,HSD17B7,HSP90AB1,HSPG2,ICAM1,IGKC,IL16,ITGA2,ITGAL,ITGAM,ITGAV,KMO,KYNU,LAMA4,LAMC1,LBP,LCN2,LXN,MAP2K3,MAPK1,MAPK14,MBL2,MECP2,…	478 (15)
methoxychlor		chemical toxicant		1.959	bias	0.000264	BAX,G6PD,HSP90AB1,LTF	338 (10)
FOXO3		transcription regulator	Inhibited	-2.385		0.000265	BAX,CAD,CAT,COL4A1,COL4A2,FABP5,FLNB,FMOD,FN1,GTF2I,ICAM1,IGFBP7,ITGAM,LCN2,MCM2,MCM7,MKI67,MMP9,MYO6,NDRG1,OPTN,PCNA,PRKCD,RELA,RTN4,RUVBL1,SIRT1,TXNRD2,VIM,YBX1	412 (20)
XRCC6		enzyme				0.000272	APOA1,APOE,BAX,FKBP5,NFKB1,SIRT1	322 (7)
trichloroethylene		chemical toxicant		0.102		0.000273	CASP3,CD63,CHP1,COL3A1,MFGE8,NCKAP1,NFKB1,RHOB,RTN4,YWHAQ
PTK2		kinase	Activated	2.013		0.000273	CSPG4,FN1,LPP,MMP9,PALLD,PTK2B,THBS1,TIMP1,TJP1,TNC	397 (18)
benzene		chemical toxicant		0.102		0.000273	CASP3,CD63,CHP1,COL3A1,MFGE8,NCKAP1,NFKB1,RHOB,RTN4,YWHAQ
FAS		transmembrane receptor	Inhibited	-2.265		0.000274	AKAP2,ANXA2,API5,BAX,CASP3,CD59,COL18A1,COL3A1,COL4A1,COL4A2,COL5A1,COL6A1,COL6A3,COL8A1,GBP2,ICAM1,IL16,ITGAV,MMP9,OPTN,PAK2,PDLIM7,PIP4K2B,PKN2,PLIN2,PRKDC,PTPN1,RELA,SIPA1,STAMBP,TAGLN2,TBC1D1,TNC	383 (16)
IL15		cytokine	Activated	2.33	bias	0.000322	ACADS,ALDOA,AZU1,CAMK2D,CASP3,CD59,CD74,CORO1A,ENO3,FBP1,G6PD,GARS,GLDC,GPD2,H2AFY,HNRNPA2B1,LSP1,MAPK1,MAPK3,MCM5,MKI67,MX1,NFKB1,PCNA,PFKP,PFN1,PGM1,PKM,PYGL,S100A11,SET,SIRT1,SRSF7,TCEA1,TIMP1,TJP1,VBP1	444 (20)
ethionine		chemical toxicant	Activated	2.121	bias	0.000326	FGA,FGB,GPX2,LCN2,S100A10,S100A11,TES,TIMP1
glucuronyl glucosamine glycan sulfate		chemical drug				0.00037	COL3A1,FN1,HSPG2	301 (12)
INSR		kinase	Inhibited	-2.328	bias	0.000384	ACAA2,ACADM,ACADS,ACSL1,ACSL4,ACSL5,ALDH2,C2,CDC5L,CFL1,COL6A3,CORO1A,DEK,DES,ECHS1,ETFDH,FBLN1,FBP1,FEN1,GOT2,IDH3A,MCM2,MCM5,MCM7,MMP9,MVK,NDRG1,PSPC1,RHOB,SIRT1,THBS2,TK2,TOMM40,YBX1	367 (14)
SMARCA4		transcription regulator	Activated	2.548	bias	0.000395	ACSL5,AGR2,AHNAK,ALDH2,APOA1,CASP3,CD63,CD74,CNP,CPS1,CTSH,CTSS,CUL4A,DES,ENO3,FBP1,FGG,FKBP5,FLNB,FN1,GMFG,HCLS1,HEXB,HKDC1,HNF4A,HYI,ICAM1,IFI30,IFITM3,IGFBP7,IRF6,ITGAV,KIF1BP,LMNA,MAPK1,MFGE8,PLIN2,PLS1,PON3,PPCS,RAB27A,RAD21,SERPINH1,SOD3,TAP1,THY1,TUBB,VIM	431 (14)
AKT1		kinase	Activated	2.506		0.000421	AKR1B10,ASS1,BAX,CASP3,CD74,COL4A1,COL8A1,FABP5,FN1,GCSH,GOSR2,GOT2,HMGB2,HNRNPM,LCN2,MMP9,NFKB1,NQO1,PCK1,PKM,RHOB,SRP14,THBS1,THBS2,TIMP1,VCAN,VIM	411 (15)
FOXM1		transcription regulator		1.684	bias	0.000424	CAT,CDC25C,CENPF,CRP,IPO7,LAMA4,MKI67,MMP9,NFKB1,PCNA,RELA,SQSTM1,STMN1,TJP1,VCAN,VIM	417 (20)
Alpha catenin		group	Inhibited	-3.349	bias	0.000424	COL3A1,COL5A1,COL6A1,COL6A2,COL6A3,IGFBP7,ITGAM,LAMA4,MMP9,RHOC,THBS2,TIMP1,TNC,VIM,ZYX	155 (7)
bisphenol A		chemical - endogenous mammalian		1.161	bias	0.000431	ATG3,BAX,CASP3,CTTN,F11R,HSP90AB1,LBP,LCN2,MECP2,MMP9,PCBP1,PCNA,PKM,POSTN,SF3A3,SNRPA1,SRSF3,TRA2A	436 (20)
prednisolone		chemical drug		-1.598	bias	0.000436	API5,APOE,ARG1,ATG16L1,ATG3,BAX,BYSL,CASP3,CAT,CRP,CTSS,FKBP5,HGS,ITGAM,MAPK14,MYH9,NFKB1,PCK1,PFKP,RPS6KB1,SOD3,SQSTM1,TMEM43	415 (15)
EIF3A		other		-1.214	bias	0.000458	NDRG1,RPA1,RPA2,RPA3
IDH1		enzyme		0.128	bias	0.000459	BCAT1,FBP1,FN1,GLUD1,GPT,PCK1,PKM,SERPINH1,VIM	136 (7)
LMNB1	1	other				0.000459	AEBP1,B2M,CRIP1,LMNA,LMNB2,PLIN2,S100A13,TGFBI,THBS2
thioacetamide		chemical toxicant	Activated	2.871	bias	0.000471	ADD3,ANXA2,ANXA4,CKB,COL3A1,EHD3,FBLN5,FGA,FGB,GPX2,GYG1,LCN2,LTBP1,LXN,PKM,PSMD10,PTK2B,RBM3,S100A10,S100A11,SCPEP1,STEAP3,TES,TIMP1	357 (7)
TWIST1		transcription regulator	Activated	2.714		0.0005	BAX,CASP3,COL6A1,DPYSL3,FCGBP,FMOD,FN1,GSN,LMNA,MFGE8,MRC2,RHOC,TGFBI,THBS2,VCAN,VIM,YBX1,ZYX	328 (8)
mibolerone		chemical drug		0.602		0.000501	ACSL1,AHNAK,CD74,CLTA,COL6A3,FKBP5,GOT2,HEXB,ISYNA1,NME2,PCNA,RPS27,SRM,STMN1,TGFBI,UCHL5
MYOD1		transcription regulator		0.615	bias	0.000503	ACACB,ACSL5,ALDOA,ASS1,COL4A1,DES,ENO3,GMFG,GRB2,HSPB8,IGLL1/IGLL5,LMNB2,MKI67,PFKM,POSTN,RRAS,SLC12A2,SRC,TJP1,TNS1	237 (6)
NOSTRIN		transcription regulator	Inhibited	-2.613	bias	0.000509	ANXA5,CASP3,COL18A1,FN1,MMP9,NFKB1,THBS1	276 (10)
ICMT		enzyme				0.000509	AEBP1,GDI1,LMNA,LMNB2,S100A13,TGFBI,THBS2
diethylstilbestrol		chemical drug	Activated	2.485		0.000511	ADH1C,BCAT1,CENPF,CTTN,DCLK1,DNMT1,DPT,FBLN1,FMOD,GTF2I,HSP90AB1,JCHAIN,KIF11,LSP1,LTF,MAPK1,MAPK3,MFGE8,MKI67,NDRG2,PCNA,RIDA,SFN,SRC,STEAP3,TBC1D1,TGFBI,THBS2	241 (7)
UCP1		transporter		-1.809		0.000538	BCKDHA,BCKDHB,CASP3,CTH,G6PD,GARS,GHITM,GSTZ1,HSD17B7,MTHFD1,NDUFB8,OAS3,PCK1,PCK2,PSPH,SHMT1,SMS,SRM
mir-1		microRNA	Inhibited	-3.188	bias	0.000547	ADAR,ANP32B,ANXA2,CAPRIN1,CASP3,CNN3,FN1,HNRNPA3,HNRNPU,MMP9,SH3BGRL3,SRSF9,TAGLN2,TMX1
epothilone B		chemical drug		1.432		0.00057	BUB3,MKI67,SFN,TBC1D1,THBS1
3-aminobenzamide		chemical toxicant		-0.391	bias	0.00057	ICAM1,ITGAL,NCL,PARP1,PCNA
TERT		enzyme				0.000589	AKAP2,B2M,BAX,EFEMP1,GSN,HMGB1,ICAM1,ITGAV,KHDRBS1,MFGE8,MMP9,MX1,NOP58,RBBP4,SASH1,VIM	346 (14)
chenodeoxycholic acid		chemical - endogenous mammalian		0.725		0.000595	ADH1B,APOA1,APOC2,APOE,FBP1,FGA,FGB,FGG,HNF4A,MMP9,PCK1,PCK2	367 (14)
CEBPB		transcription regulator		1.41	bias	0.000595	ADH1C,AKR1B10,ARG1,BHMT,CDC25C,CIRBP,CPB2,CRP,CYB5A,DHRS1,DHX9,ELANE,FBLN1,HMGA1,HSD11B1,ICAM1,IFITM3,IGKC,ITGAL,LAMC1,LBP,LCN2,MBL2,PCK1,PCNA,PEA15,PRKCD,RBBP7,SERPINA1,SIRT1,SLC12A2,SRP54,VCAN,VIM,ZYX	419 (19)
mir-214		microRNA		-1.387	bias	0.000601	CELF1,LTF,NFKB1,PCK1,PSMD10,RELA
Rock		group		1.937	bias	0.000615	CNN1,COL3A1,DES,FN1,ICAM1,LPP,PPP1R12A,THBS1,TJP1	333 (18)
PRL		cytokine	Activated	4.353	bias	0.000619	ADAR,ANXA2,ANXA5,B2M,CAPN2,CNN3,COL3A1,COL5A1,CTSH,CTSS,DES,ECM1,EIF2AK2,FN1,HNRNPH2,HSD17B7,LAMC1,MFGE8,NFKB1,OAS3,PC,PCNA,RHOG,TIMP1,TPM3,VIM	402 (17)
JUN		transcription regulator		0.413	bias	0.00062	ANXA2,APOE,ARG1,BAX,C5,CAPN2,CAPNS1,CSTA,DICER1,DNMT1,EHD4,EPHX2,FBLN5,FN1,FUS,GPT,HMGA1,HNRNPA2B1,HNRNPU,ICAM1,IGFBP7,ITGAM,ITGAV,LBP,LMNA,LTBP1,MAPK3,MMP9,NQO1,PEA15,RHOB,S100A10,SRSF2,STMN1,THBS1,TIMP1,TNC,VIM	483 (20)
BRCA1		transcription regulator		1.573		0.000622	BAX,BCKDHB,CDC25C,COL18A1,FEN1,FKBP5,HNRNPD,HSPB1,MX1,NQO1,PCNA,SAFB,SFN,SIRT1,TAP1,TP53I3,UBE2I,VCAN,VIM	438 (19)
PSEN1		peptidase		-1.29		0.000628	ACSL1,ALDOA,APOE,ARF5,ATOX1,BAX,CAMK2D,CASP3,CD74,CFL1,CFL2,CKB,CLTA,CTSS,EEF1G,GOT2,HBZ,KIF5B,MAPK1,MMP9,NCSTN,PDXDC1,PEA15,PKM,SQSTM1,SRC,STMN1,TOP2B,TPM3,TUBA1C,TUBB,TUBB2A,TUBB4B	417 (18)
SRSF2	2.087	transcription regulator				0.000653	HNRNPH1,PTBP1,PYGM,SRSF1,SRSF2,SRSF6,SRSF7,VIM
NR4A1		ligand-dependent nuclear receptor		0.201		0.00066	ACSL4,ALDOA,APOE,COL6A1,COL6A2,EHHADH,ENO3,FBP1,G6PD,HDAC6,ICAM1,IDH3A,IL16,MMP9,PC,PCK1,PCK2,PCNA,PDK3,PFKM,PGM1,PHKG2,PPA1,PYGM,TJP1	400 (20)
CDK9		kinase				0.000709	CAD,FGG,G6PD,HNRNPH1,MMP9,NCL,PTBP1,SRSF6,VIM
SP110		transcription regulator		-1		0.000747	ANXA5,CD74,CDC37,DICER1,FUS,IFITM3,ITGAV,LMNA,MX1,MYH9,OAS3,RPA1,SERPINA1,SQSTM1,TIMP1,TRIM28
TXN		enzyme		-0.808		0.000767	ACADM,APOA1,C5,ICAM1,MAPK14,MMP9,NFKB1,RELA	407 (19)
INHBB		growth factor	Activated	2.213	bias	0.000778	COL3A1,COL4A1,THBS1,TIMP1,TNC	132 (7)
QKI		other		1.172		0.000778	H2AFY,HNRNPH1,PEA15,TNC,VIM
PKD1		ion channel	Inhibited	-2.728		0.000794	ACOX2,ALDH8A1,ARHGAP10,BCAT1,BHMT2,COL12A1,CPN2,FAM98B,GLS,LTBP1,PAH,PCK1,PML,PRODH2,SEPT7,SFXN3,SYNE1,TBC1D4,TNS1,VWF
ADRB		group		0.5		0.000807	ANXA5,ARG1,BAX,CASP3,HSD17B7,ICAM1,LTBP1,MMP9,NCL,NQO1,PCNA,RAN,SLC9A3R2,SMC1A,SQSTM1,SRM	427 (17)
MTOR		kinase		0.718		0.000817	ACACB,ACADM,CASP3,CNP,DDAH2,ELOB,FABP5,FGB,FN1,GLUD1,GSTZ1,HSD11B1,HSP90AB1,HSPB1,LDHD,MLYCD,MMP9,NSUN2,PCNA,PDK3,PFKP,PFN1,PKM,PTBP1,RAB11B,RELA,SERPINA1,SLC12A2,SQSTM1,SRC	423 (17)
miR-124-3p (and other miRNAs w/seed AAGGCAC)		mature microRNA	Inhibited	-3.738	bias	0.000877	ACAA2,CD59,CHP1,F11R,FAM129B,GSN,LAMC1,LMNB1,MAPK14,MYH9,NECAP2,NID1,OSBPL8,PDLIM7,PGM1,PLOD3,PLP2,PTBP1,RELA,RHOG,SLC30A7,SYPL1
Atg5		other				0.000893	BAX,CASP3,SQSTM1	57 (3)
VBP1	1.246	other				0.000893	PFDN1,PFDN2,PFDN5
FUT4		enzyme				0.000893	BAX,CASP3,PARP1	221 (7)
PFDN2	2.184	other				0.000893	PFDN1,PFDN5,VBP1
CIP2A		other		-1.32		0.000896	COL8A1,DSC2,ENO3,LXN,NCL,PDLIM7,PKM,RAB31,RHOC,S100A16
Collagen type I (complex)		complex	Activated	2.578	bias	0.000896	APOE,BAX,CPB2,FN1,ITGA2,ITGAV,MMP9,S100A10,TNC,VIM	413 (18)
miR-29b-3p (and other miRNAs w/seed AGCACCA)		mature microRNA	Inhibited	-3.093	bias	0.000896	COL3A1,COL4A1,COL4A2,FAM3C,GMFB,LAMC1,NASP,PPIC,SRSF10,TUBB2A
andrographolide		chemical drug		-1		0.000902	BAX,CASP3,FN1,ICAM1,MMP9,SRC,TIMP1	384 (17)
SOX4		transcription regulator	Activated	2.677	bias	0.000927	ADGRE5,AES,ALDH1B1,BAX,CAPN2,CD74,DDAH2,DICER1,FN1,GLDC,IFI30,IGKC,KYNU,PPIC,PPM1F,PYGL,TAX1BP3,TES,VIM
glucagon		biologic drug		-1.03	bias	0.000931	ADD3,AHNAK,EIF4B,LIMA1,LMNA,NDRG2,PPP2R5D,RBM14,TNS1
PTEN		phosphatase		-0.505		0.000951	ACAA1,ACAA2,ACSL1,ARG1,ARHGAP10,BAX,CAD,CNN3,CSRP1,CTNNBL1,CUL4A,DENR,DRAP1,EHHADH,GMDS,GTF2I,H2AFY,HCLS1,HEXB,IDH3A,IFI30,LHPP,LRRFIP1,MAPK14,MKI67,MMP9,MRC1,MRPL12,MYO6,NDRG1,NFKB1,NME2,NQO1,PARP1,PGM1,PLOD1,PYGL,RANGAP1,RPS6KB1,SDHA,SNRPF,SRC,SRSF1,SRSF10,THBS1,THYN1,TRAPPC3,XRCC5	470 (19)
SLC13A1		transporter	Inhibited	-2.309		0.000987	ACSL5,APOA4,BYSL,C6,EEF1G,EFTUD2,GBP2,HSPB1,PCK1,RPL8,SDF2L1,TUBA1C
MAP4K4		kinase		1.604	bias	0.00101	ACAA2,ACACB,ACADS,ACSL5,AGL,APIP,AUH,BCKDHB,GCDH,GRHPR,NT5C2,PFKM,PGM1,RPS6KB1	76 (4)
HNF1A		transcription regulator		1.353	bias	0.00102	ADH1B,ADH1C,ADH6,AIMP1,ANXA4,ATG3,BAG6,C2,C5,C8B,C8G,COL3A1,CPB2,CRP,CYB5A,FBP1,FGA,FGB,GARS,GMDS,GPX2,GRHPR,HNF4A,HSD11B1,LBP,MTHFD1,NRDC,PAFAH2,PAH,PCK1,PFKP,PPCS,RBP5,SERPINA1,SFXN2,SRC,SRI,UGT2B7	413 (10)
IL6		cytokine	Activated	2.378	bias	0.00106	ADGRE5,AGL,AHNAK,AKR1B10,APOA1,APOE,ARG1,BAX,BUB3,CAPRIN1,CASP3,CD74,CDC25C,COL3A1,CPB2,CRP,CTR9,CUL4A,DNMT1,DPP3,ELANE,ERBIN,FGA,FGB,FGG,FN1,GBP2,GP5,HBZ,ICAM1,IFITM3,ITGAM,ITGAV,JCHAIN,KIF11,LBP,LCN2,LTF,MKI67,MMP9,NFKB1,PCNA,PRPH,RAB27A,SERPINA1,SLC12A2,SLC39A14,SRC,TAP1,THBS1,TIMP1,TNC,VASP,VIM,XRCC5	407 (16)
Pln		other				0.00106	ALDOA,ANXA2,APOA1,DES,MYL6,RAB1A,RAB21,RRAS,VIM
STAT6		transcription regulator		-0.96		0.00107	ACSL1,AHCYL1,AHNAK,ALDH2,APOE,ARG1,ASS1,AUH,BAX,CRIP1,CTSS,CYP4A11,EFHD2,EHHADH,EIF2AK2,FKBP5,FYCO1,GBP2,IFITM3,KMO,KRR1,LACTB,MMP9,MVK,MYO6,OAS3,PLS1,S100A10,SERPINA1,SQSTM1,TES,THY1,TIMP1,VIM	408 (18)
STAT3		transcription regulator	Activated	3.092	bias	0.00108	APOA4,ARG1,C5,CASP3,CAT,CD74,COL3A1,COL5A1,CRP,CTTN,DNMT1,EIF2AK2,FGA,FGB,FGG,FN1,GBP2,HNF4A,HNRNPD,ICAM1,IFI30,IFITM3,ITGAM,ITGAV,LBP,LTF,MMP9,MX1,NDRG1,NFKB1,NPM1,OAS3,PCK1,PML,PSIP1,RAB27A,SERPINA1,TAP1,THBS1,TIMP1,TNS1,TRIM22,VCAN,VIM	364 (15)
4-hydroxyestradiol-17beta		chemical - endogenous mammalian		1.15	bias	0.00111	CAT,LTF,NOP58,NQO1	39 (2)
mir-21		microRNA		-1.758	bias	0.00117	ANLN,CACYBP,COL3A1,DDAH2,FAM3C,FN1,FUBP1,GBP2,HNRNPA2B1,ICAM1,KIF5B,MKI67,MMP9,NMT1,OAS3,PPA1,RACGAP1,RHOB,SOD3,SRSF3,STMN1,TAP1,TBC1D1,TP53RK,YWHAB	360 (18)
CTSS	1.261	peptidase				0.00117	CASP3,COL4A1,COL4A2,COL4A3,MMP9,PRKCD	172 (8)
FOLR1		transporter				0.0012	ADH1C,CAT,GBA,GIMAP1,LSP1,NAP1L1,PFN1,SNRPF,STXBP2,TAGLN2,UBE2V1,UCHL5
IL10RA		transmembrane receptor		-0.192		0.00121	ABAT,ACSL1,ACSM3,ADD3,ADH1C,ALDH2,APOC2,ASPN,ASS1,BAX,CTH,DPT,ECM1,EFEMP1,F10,FABP5,FN1,GBP2,HAO2,ITGAM,LCN2,NDRG2,PCK1,POSTN,PYGL,TAP1,TAP2	243 (7)
let-7		microRNA	Inhibited	-3.214	bias	0.00122	ALDH1B1,BCAT1,CASP3,COL3A1,DICER1,EIF4G2,FN1,GTF2I,HMGA1,MCM2,MCM5,MCM7,MGAT1,MRTO4,NAP1L1,NFKB1,PKM,RELA,THBS1,VIM	394 (18)
WT1		transcription regulator		0.059		0.00123	ADGRE5,CAPRIN1,CD2AP,CIRBP,CLIC1,COL4A1,CSPG4,CUL4A,EPS8,GSN,HSPG2,ITGAM,MMP9,MYL6,NCSTN,NDRG1,PCK2,SMC1A,SQSTM1,SRSF6,THBS1,YBX1
CDKN2A		transcription regulator		-0.922		0.00132	BAX,CAPG,CASP3,CDC25C,CRP,DEK,EHD3,EPS8,FEN1,HAUS1,HMGB2,ITGAV,KANK2,MCM5,MCM7,MKI67,MRC1,NPM1,PCNA,PML,PTK2B,RAB27A,RBBP7,TMPO,TRIM28,VIM	422 (18)
ESR2		ligand-dependent nuclear receptor		0.288		0.00133	AES,ANXA4,APOE,BCAT1,CAPN2,CNN1,FBLN1,FN1,GALNT7,GCSH,GYG1,HSD17B7,HSPA2,ITGA2,LMNA,LTBP1,MAP2K3,MAPK1,MAPK14,MAPK3,MBL2,ME2,MKI67,NDRG1,NDRG2,NFKB1,NID2,PDLIM3,PLIN2,PPP1R12A,PYGL,RELA,SFXN3,TIMP1,TP53I3,USP19,VIM,VWF	476 (17)
MRTFA		transcription regulator	Activated	3.215		0.00134	CNN1,CNN2,CTTN,ELANE,EPPK1,EPX,F11R,FCN1,FLNA,ICAM1,LCN2,LTF,MMP9,MYH9,MYL9,PFN1,TNC	259 (9)
EIF4E		translation regulator	Activated	3.317	bias	0.00134	ATOX1,BCLAF1,CAPG,FN1,GPS1,GPX2,GRB2,ILF2,MMP9,NEDD8,NOP10,PCNA,RHOG,RPL35,RPL37A,TGFBI,TNC
BRD7		transcription regulator		0.927	bias	0.00135	BAX,DICER1,NDRG1,TRIM22,VCAN	417 (14)
ERG		transcription regulator		1.319	bias	0.00137	ARHGAP17,CD59,DOCK2,FKBP5,FLNB,GMFB,HDAC6,HMGB1,HPCAL1,ICAM1,LAMA5,MMP9,MYO1D,NDRG1,RPA1,RRAS,THBS1,VIM,VWF,WDR91	355 (11)
troglitazone		chemical drug		-1.231		0.00138	ACADM,ACADS,ACSL1,ANXA2,BAX,BCKDHA,CD59,CFL1,COL4A1,FABP5,FGGY,FN1,GBP2,HMGB1,HMGB3,ICAM1,LAMA4,MKI67,MMP9,NDRG1,NFKB1,PC,PCK1,PCNA,PFAS,PLIN2,RACGAP1,RELA,SEPT7,TSN,XRCC5	429 (19)
TCOF1		transporter				0.00141	ANXA2,BCLAF1,CAPRIN1,GRHPR,MAPK14,NDRG1,NUDCD3,NUP155,PRPF40A,S100A16
ADORA2A		G-protein coupled receptor		1.682		0.00144	CKB,COL3A1,COL6A1,EIF2S2,G3BP2,GDI1,HNRNPK,IFITM3,KIF5B,MMP9,PEA15,PPP1CA,SSRP1,TJP1,TUBB2A
SUMO3		other		-1.254		0.0015	CD59,CTH,HMGA1,PML,TAP1,TNC,XRCC5	322 (7)
CLDN7		other		1.497		0.00151	APOE,GLS,IGFBP7,LIMA1,MMP9,MRPS17,MX1,NTPCR,PLGRKT,RSL1D1,SCEL,SF3B6,TJP1,TMCO1
ursolic acid		chemical drug		-1.756		0.00154	ATG16L1,BAX,CASP3,EIF2S2,HMGB1,MKI67,MMP9,NARS,RELA	406 (17)
SMAD7		transcription regulator		-1.647		0.00155	ADH1C,CDC25C,COL3A1,COL6A1,COL6A3,CRP,EFEMP1,FN1,ICAM1,MMP9,NID2,PCNA,TGFBI,TIMP1,TPM2,TPM3	414 (18)
AGT		growth factor	Activated	3.827	bias	0.00157	ADD3,ADH1C,BAX,CASP3,CAT,COL3A1,COL4A1,COL6A1,CRP,CTSS,CYP4A11,DDAH2,EFEMP1,FN1,GFPT1,HMGB2,HSPB1,HSPG2,ICAM1,ITGA2,ITGAV,LPP,MMP9,NCL,NDRG1,PALLD,PARP1,PFN1,POSTN,RELA,RRAS,SOD3,TIMM9,TIMP1,TJP1,VIM	403 (18)
tetrathiomolybdate		chemical drug		-1	bias	0.00161	ITGAM,MMP9,S100A13,TIMP1	294 (7)
androstenediol		chemical - endogenous mammalian		1.98	bias	0.00161	BAX,FKBP5,NFKB1,RELA	384 (16)
estrogen receptor		group	Inhibited	-2.846		0.00161	BAX,CAPG,CD59,COL12A1,COL4A1,COL4A2,COL5A1,COL6A1,COL6A2,DICER1,DNMT1,DSC2,F11R,FN1,HTRA2,ICAM1,LTF,MMP9,PPP5C,TIMP1,TNC,VIM	482 (20)
IGF1R		transmembrane receptor		1.259	bias	0.00162	ACADM,ACADS,ACSL1,ALDOA,BAX,CAPG,COL18A1,COL3A1,COL4A1,COL4A2,DES,IL16,ITGAM,MAPK14,PDCD10,PKM,RAB1A,RACGAP1,RBBP7,RBM3,RELA,RPL37A,TGFBI,TJP1	412 (18)
IgG		complex		-1.194		0.00163	APOE,B2M,C5,COL3A1,CSNK2B,FABP5,FN1,HSPB1,IFITM3,IL16,ITGAM,LCN2,MMP9,PEA15,PPIF,STK24,TAPBP,THBS1,TNC,TUBB2A	356 (16)
SMAD3		transcription regulator	Activated	3.194	bias	0.00166	APOA1,APOA4,ASPN,CD59,COL3A1,COL6A1,COL6A3,CRP,DES,FN1,GLS,HNF4A,MMP9,PC,PCNA,RHOB,THBS1,TIMP1,TNC,TPM2,TPM3,VIM,ZYX	421 (16)
tetradecanoylphorbol acetate		chemical drug	Activated	2.366	bias	0.00167	ACSL4,ACSM5,AHSA1,AKR1B10,ARG1,AZU1,BAX,C5,CAPG,CAT,CSTA,CTSH,CTTN,CUL3,DEK,DES,DNAJC3,DNMT1,ECM1,EIF2AK2,ELANE,FCGBP,FKBP5,GLS,HMGA1,HNF4A,HNRNPC,HNRNPK,HSD11B1,HSP90AB1,ICAM1,IKZF1,ILF3,ITGA2,ITGAL,ITGAM,LCN2,LRRFIP1,MECP2,MMP9,MRC1,MRPL12,MYH9,NFKB1,NME2,NPM1,NQO1,PAK2,PCK1,PCK2,PCNA,PDLIM7,PEA15,PES1,PKM,PLIN3,PPP1R12A,PRKCD,PTPN1,RAB27A,RANBP1,RBBP4,RELA,S100A10,SERPINA1,SLC12A2,SRC,SULT1A1,…	457 (15)
bleomycin		chemical drug	Activated	3.007	bias	0.00172	ARG1,BAX,C5,CASP3,COL3A1,CTSS,F2,FN1,ICAM1,LMNB1,LTBP1,MAP4,MMP9,MRC1,PCNA,RELA,THBS1,TIMP1,VWF	427 (15)
20-hydroxyeicosatetraenoic acid		chemical - endogenous mammalian				0.00173	APOA1,CYP4A11,EPHX2
KLF17		transcription regulator				0.00173	FN1,TJP1,VIM	322 (7)
CPXM1		peptidase				0.00173	COL4A2,COL5A1,COL6A1
ATP6V0A2		transporter				0.00173	ARG1,MMP9,MRC1
PAXIP1		other				0.00173	CRIP2,CSPG4,ENO3
MEL S3		chemical - kinase inhibitor		0		0.00174	GLUD1,HNF4A,KHSRP,PCK2,TUBB,VIM
estrogen		chemical drug	Activated	2.214	bias	0.00181	ALDH1B1,AP3D1,APOA1,APOE,CDC25C,CKB,COL18A1,COL3A1,COL4A2,COL5A1,COL6A2,DNMT1,FBLN1,FEN1,FN1,G6PD,ICAM1,LCN2,LTF,MCM5,MCM7,PCNA,RAB11B,SRM,SRSF2	435 (21)
homocysteine		chemical - endogenous mammalian		1.344		0.00186	ANXA2,APOA1,BAX,BHMT,DDAH2,DES,ITGAM,NDRG1,PKM,SIRT1,TIMP1	448 (20)
YAP1		transcription regulator	Activated	2.629	bias	0.00191	ANLN,BAX,CASP3,DICER1,DTYMK,FLNA,FN1,ICAM1,LMNA,LMNB1,MYH9,MYL9,SFN,THBS1,TUBB,VIM	393 (18)
simvastatin		chemical drug		0.165		0.00204	APOA1,APOE,BAX,C12orf10,CASP3,CRP,FGA,GPT,HIST1H1C,ICAM1,ITGAL,LCN2,MKI67,MMP9,NONO,RELA,RHOB,TIMP1,VIM,VWF	360 (17)
pimagedine		chemical drug		-0.816		0.00205	BAX,CASP3,CNN1,COL4A1,CRP,ICAM1,RELA	178 (10)
camptothecin		chemical drug		1.647		0.00206	ABCF2,AKAP2,ALDOA,ANXA2,ANXA4,API5,APOE,BAX,CASP3,CD59,ENO3,GBP2,ICAM1,IL16,MCM2,MMP9,MYO6,NCL,NFKB1,OPTN,PAK2,PCBP4,PCNA,PDLIM7,PIP4K2B,PKN2,PLIN2,PPIF,PRKDC,PTPN1,RPA3,RSL1D1,SFN,SIPA1,STAMBP,SYNE1,TAGLN2,TAP1,TBC1D1,TGFBI,TP53I3,TRA2A,TUBB,TUBB2A	387 (15)
PHOSPHO1		enzyme				0.0021	PSPH,SHMT1
FSCN2		other				0.0021	ESPN,PLS1
MIR585		microRNA				0.0021	CASP3,PARP1
APOC1		transporter				0.0021	APOE,CASP3
TAN 67		chemical reagent				0.0021	MAPK1,MAPK3
CASP3	5.011	peptidase	Activated	2.236		0.0021	BAX,CAPN2,CASP3,EIF2A,IL16,MMP9	398 (18)
NFKBIA		transcription regulator		0.015		0.00215	ADGRE5,AEBP1,APOA1,BAX,BCCIP,BCKDK,COL3A1,CSK,EIF4G2,FN1,GBP2,HMGA1,ICAM1,IPO9,ITGA2,ITGAV,LAMA5,LCN2,LIMA1,MFGE8,MMP9,NDRG2,NFKB1,NID1,PCNA,PEA15,RELA,RPL8,SLC12A2,SOD3,TIMP1,TMPO,TNC,XRCC5	418 (17)
FBN1		other		-1.982	bias	0.0022	COL3A1,COL4A2,COL6A3,LTBP1,MMP9	400 (13)
tanespimycin		chemical drug		-1.521	bias	0.00221	AHSA1,HNRNPA1,HNRNPA2B1,HNRNPC,HNRNPM,HSP90AB1,PRMT5,RBMX,RPL35,SERPINH1,SIRT1,SNRPF,SRC,SRSF2
medroxyprogesterone acetate		chemical drug		-0.932		0.00221	ANLN,BAX,CASP3,CENPF,COL4A3,FMOD,FN1,HSD11B1,ICAM1,KIF11,LMNA,MCM5,TNC,VCAN	453 (21)
UGCG		enzyme		0		0.00224	BAX,CASP3,ICAM1,PCK1	415 (17)
LAMA2		other				0.00224	CSK,DES,LAMA4,MMP9
EPO		cytokine		1.293	bias	0.00229	B2M,BAX,CASP3,CLIC1,DES,FABP5,FBXL18,FECH,GBA,H2AFY,HMGB1,ILF2,NPM1,PBXIP1,PCNA,PRKCD,RCC2,RELA,SIRT1,SON,SSRP1,TJP1,TSN,VWF,YBX1	394 (15)
inosine		chemical - endogenous mammalian	Activated	2.777	bias	0.00236	ANXA2,ANXA5,C2,CD63,IFITM3,RHOC,TIMP1,VIM
RTN4	1.959	other		-0.728		0.00236	CFL1,GNB2,NQO1,PEA15,RHOB,RTN4,YWHAB,YWHAQ
2,3,4,7,8-pentachlorodibenzofuran		chemical toxicant		0		0.00236	CAP2,CAT,CYB5A,DNMT1,GRHPR,HSPA2,NQO1,UGT2B7
KLF11		transcription regulator		0.426		0.00238	ACSL5,CAT,COL3A1,IDH3A,ITGA2,ITGAV,LTBP1,MMP9,NFKB1,SERPINA1,SERPINH1,THBS1,THBS2,TIMP1
hydrogen peroxide		chemical - endogenous mammalian		1.923	bias	0.0024	AEBP1,ANXA2,BAX,CASP3,CAT,CD59,CD63,CDC25C,CTSS,DDAH2,DNMT1,ELANE,EXOSC9,FN1,HMGB1,HNRNPA1,ICAM1,ISCU,ITGA2,LCN2,MAPK14,MCM2,MMP9,NQO1,PAH,PARP1,PDCD10,PFDN5,PPP1CA,RAB27A,RAN,RSL1D1,SERPINH1,SIRT1,STMN1,TAP1,TUBB2A,VIM	472 (20)
PLN		transporter				0.00244	ALDOA,ANXA2,APOA1,DES,MYL6,RAB1A,RAB21,RRAS,VIM
MAX		transcription regulator				0.00245	BAX,CAD,DKC1,HMGA1,MTHFD1,NCL,NPM1,RBBP4,RBBP7,SCPEP1,YBX1	217 (4)
5-hydroxytryptamine		chemical - endogenous mammalian	Activated	2.433	bias	0.00253	AP1M1,CFL1,DUOX2,GNB2,ICAM1,MAPK3,MYL6,PFN1,PLIN3,PPP1CA,PPP2R5D,THBS1,TUBB
fluticasone propionate		chemical drug		0.599		0.00254	CD74,CRP,FBLN5,FCN1,FKBP5,HSD11B1,MBL2,MFGE8,MMP9,MX1,PLIN2,SERPINA1,TAP1,THBS1,TIMP1,TPM3,VWF	454 (15)
SP600125		chemical - kinase inhibitor	Inhibited	-2.768		0.00262	APOA1,APOE,BAX,BDH1,CASP3,CD2AP,COL4A1,COL4A2,COL8A1,CSPG4,DNMT1,FABP5,FN1,GBP2,HNF4A,ICAM1,ITGA2,LAMA5,MMP9,PARP1,PCK2,POSTN,SERPINH1,THBS1,THBS2	468 (17)
INSIG1		other		0.137	bias	0.00263	ACACB,ACSL4,APOE,CYP4F2,FABP5,G6PD,LCN2,MRC1,MVK,PLIN2,RAB27A,TM7SF2	227 (6)
CTNNB1		transcription regulator		1.983	bias	0.0027	ADSS,AES,AGRN,C6,CAPNS1,CNN2,COL4A1,COL4A2,CRIP1,CYB5A,DDX17,DES,ECM1,EHD1,ENO3,ENPP1,FBLN2,FEN1,FN1,GPX2,HBZ,HNF4A,HNRNPA0,HNRNPUL1,ILF3,ITGAL,JCHAIN,LMNA,LSP1,MAN2B1,MAP4,MFGE8,MMP9,NAT8,NDRG2,NME3,PCNA,PFN1,PML,POLR2A,PRRC2A,SERPINA1,SF3A1,SFN,SLC12A2,SLC39A14,SMS,SQSTM1,SRSF1,TIMP1,TJP1,TNC,UPB1,VCAN,VIM	374 (17)
RABL6	3.93	other	Activated	2.333	bias	0.00272	ABAT,CDC25C,CENPF,FEN1,MCM2,MCM5,MCM7,PSME3,SERPINH1	322 (7)
CLPP		peptidase		1.667	bias	0.00272	ACADM,ACADS,ACSL1,ALDH2,ALDOA,ETFDH,IDH3A,PC,SDHA
BCL2L1		other		1		0.00272	BAX,CASP3,COL6A2,ECM1,FN1,MMP9,NQO1,THBS1,TIMP1	389 (15)
TSC1		other		-1.576		0.00272	BAX,FLNA,GPX2,LHPP,MKI67,NME2,NPM1,NQO1,RPS6KB1	95 (5)
DDIT3		transcription regulator		0.577		0.00273	FN1,ITGA2,ITGAM,LCN2,NDRG1,PCK2,PCNA,SRSF1,SRSF2,SRSF6,STXBP2,THBS2,VIM	347 (14)
miR-199a-3p (and other miRNAs w/seed CAGUAGU)		mature microRNA	Inhibited	-2.236	bias	0.00274	FN1,FUBP1,NFKB1,RELA,VCAN	144 (7)
PCGEM1		other		1.003	bias	0.00274	ALDOA,G6PD,GLS,GLUD1,MLYCD,PKM,SDHA	297 (7)
SRF		transcription regulator	Activated	2.718		0.00289	CAPRIN1,CNN1,CNN2,CSRP1,CTNNBL1,DES,ELANE,EPX,FCN1,FLNA,GP5,GSN,HSPG2,ITGAM,LCN2,LMCD1,LTF,MMP9,MYH9,MYL9,NPM1,PDCD10,PDLIM7,PGM1,TNC,TUBB4B,VCAN,ZYX	177 (9)
FMR1		translation regulator		-0.084	bias	0.0029	ALDOA,CFL1,FXR1,MMP9,MRPL11,MRPL12,MRPL41,MRPS28,MYL9,PFKP,PFN1,PTK2B,SASH1,TAGLN2,VWA1
2-hydroxyestradiol		chemical - endogenous mammalian				0.00292	CAT,NQO1,PCNA
MED28		other				0.00292	AEBP1,CNN2,CRIP1
MYCBP		transcription regulator				0.00292	CAD,EIF2A,NCL
P2RY4		G-protein coupled receptor				0.00292	ICAM1,MMP9,TIMP1	148 (7)
TMPO	1.391	other				0.00292	ASPN,COL12A1,COL3A1
RASSF1		other		0.194		0.00292	ABAT,APOE,CASP3,COL4A1,COL4A2,CRIP2,EFEMP1,GSN,MYL9,TUBB,TUBB2A	375 (14)
sphingosine-1-phosphate		chemical - endogenous mammalian	Activated	2.225	bias	0.00292	ANXA2,COL3A1,FN1,HSD11B1,ICAM1,MMP9,PRPH,THBS1,TIMP1,VIM,VWF	425 (17)
levodopa		chemical - endogenous mammalian		-1.363		0.00296	ADAR,ADD3,ARAP1,ATG16L1,BANF1,BAX,C8B,CAPG,CASK,CASP3,CD63,COL4A1,DCTN3,EIF4G2,EPS15L1,ERLIN1,F11R,FBLN1,FBLN2,FKBP5,GPD2,GPS1,HCLS1,HEXB,HSPB6,LMNA,LPP,LTBP1,NASP,NCBP1,NEDD4L,PFKP,PTBP1,PTK2B,RAB13,RENBP,S100A10,SF3A1,SFXN3,SH3BGRL3,SRM,SUB1,SYNE1,SYPL1,TAX1BP3,TPD52,UPB1
Stat3-Stat3		complex	Activated	2.415	bias	0.00296	CRP,FGA,FGB,FGG,ICAM1,LBP
SHC1		other		0.692		0.00301	BAX,HMGB2,ICAM1,ITGAM,MAP2K3,NQO1,PCNA,SQSTM1	387 (16)
3-nitropropionic acid		chemical toxicant		1.094		0.00301	BAX,CASP3,GYG1,MMP9,NPM1,NQO1,PC,SQSTM1	407 (15)
Coup-Tf		group				0.00303	ACADM,HNF4A,LTF,PCK1	131 (7)
selenite		chemical toxicant				0.00303	BAX,MMP9,TIMP1,TXNRD2	293 (12)
gallic acid		chemical - endogenous non-mammalian		-0.152	bias	0.00303	BAX,GPT,GRB2,MMP9	316 (13)
miR-122-5p (miRNAs w/seed GGAGUGU)		mature microRNA	Inhibited	-2.256	bias	0.00303	ALDOA,BCKDK,FUBP1,HMGB1,MECP2,PKM,PSME3,TPD52L2,VIM
KLF3		transcription regulator	Inhibited	-2.353		0.00306	ACOT9,AHNAK,ANXA5,APOE,CAMK2D,CAPG,CAPNS1,CIRBP,GPD2,HEXB,HM13,HNRNPH1,MRPL14,NDRG1,NSUN2,PFKP,RMDN1,RUVBL1,SEPT6,SERPINH1,SIRT1,TES,THYN1,TIMM10B,TMPO,TPM3,VIM
PTGER2		G-protein coupled receptor		0	bias	0.00309	ANAPC1,CENPF,ECM1,EXOC7,ITGAL,KIF11,MKI67,MMP9,PABPN1,RACGAP1,THBS1,TIMP1	323 (16)
mir-223		microRNA		0.431		0.00316	BST1,C7,CYB5A,ELANE,GFPT1,ICAM1,KIF1BP,MYO1D,NDRG2,NQO1,PARP1,POSTN,STMN1,TGFBI
NR3C2		ligand-dependent nuclear receptor	Activated	2.158		0.00316	APOE,ARG1,BAX,CAT,CNN3,COL3A1,DES,ECHDC2,FKBP5,FN1,ICAM1,LCN2,NDRG2,TGFBI	461 (23)
SREBF2		transcription regulator		-0.659	bias	0.00318	ACAA2,ACSL1,CYB5A,CYP4F2,FABP5,G6PD,GTF2I,MVK,PLIN2,TM7SF2	332 (8)
rifampin		chemical drug				0.0033	CD59,CFL1,COL6A1,CYP4A11,FGGY,FMO5,GBP2,HMGB3,ITGAM,PCK2,PFAS,RACGAP1,SEPT7,TSN,XRCC5
NR3C1		ligand-dependent nuclear receptor		-1.096		0.00331	ADH1C,APOE,B2M,BAG2,BAX,BCKDHA,CAPN2,CAT,CPB2,CPS1,CTNNBL1,CUL4A,FKBP5,FN1,FNTA,G6PD,GBP2,HNRNPU,HSD11B1,HSP90AB1,ICAM1,ITGAV,MAPK1,MAPK3,MMP9,MTHFD1,NFKB1,NMT1,NQO1,PAK2,PARP4,PCK1,PEA15,PLIN2,PRKCD,PRPF40A,PRPH,PTK2B,RAD21,RELA,RHOB,RTN4,SERPINA1,SON,THBS1,TP53I3,WDR3	456 (16)
isobutylmethylxanthine		chemical toxicant	Activated	2.132	bias	0.00337	ACSL1,ACSL4,AEBP1,COL3A1,COL5A1,COL6A1,FN1,HSD17B7,MAPK1,MAPK3,PCNA,PLIN2,SDHA,THBS1,THBS2,TIMP1,TNC,TPD52L2,TUBB	355 (19)
SEMA7A		transmembrane receptor	Activated	2.236	bias	0.00337	BAX,COL3A1,CTSS,FN1,TIMP1	245 (7)
pitavastatin		chemical drug		-1.109	bias	0.00337	ACADM,APOA1,CAT,SIRT1,SLC27A2	286 (9)
E2F3		transcription regulator		0.359	bias	0.00342	COL18A1,DEK,ECHDC2,FBLN5,HIST1H1C,HMGB2,LAMA4,LBR,MCM2,MCM5,MCM7,PCNA,SERPINH1,THBS1,TM9SF2,TMPO,TOP2B	381 (12)
BMS-690514		chemical drug		-1.633		0.00348	BAG2,CTSH,MCM5,MCM7,PCNA,TP53RK	332 (7)
ITGAV	1.685	transmembrane receptor		1	bias	0.00348	BAX,FN1,ITGAV,MMP9,PCNA,TIMP1	399 (18)
SIRT1	-1.28	transcription regulator		-1.572		0.00352	ACADM,ADAR,ANXA4,BAX,BCLAF1,CAT,CD74,CORO1A,DDAH2,EIF2S2,FN1,GFPT1,ICAM1,IFITM3,JCHAIN,KIF13B,LAMA4,MGAT1,MMP9,MVK,MYL6,NEDD4L,PARP1,PC,PCK1,PCK2,PML,PYGM,SIRT1,SOD3,TAP1	446 (19)
advanced glycation end-products		chemical - endogenous mammalian		0.956	bias	0.0036	BAX,CASP3,DDAH2,FN1,MKI67,MMP9,PFN1	369 (21)
Ifn		group		0.914	bias	0.00366	B2M,CD58,CYP4A11,EIF2AK2,ICAM1,IFITM3,LCN2,MMP9,MX1,OAS3,PML,TAP1,TRIM22	415 (17)
Pro-inflammatory Cytokine		group		0.218	bias	0.00372	APOE,ASS1,ENPP1,HDAC6,ICAM1,LCN2,MMP9,SIRT1,TIMP1	347 (17)
dextran sulfate		chemical drug		-1.715	bias	0.00375	ANLN,ARG1,CD74,COL18A1,ICAM1,IFITM3,KIF11,MCM5,MKI67,MMP9,MRC1,NQO1,PARP1,PCNA,RACGAP1,RBBP4,RELA,STEAP3,STMN1,THBS1,THBS2,TJP1	382 (16)
CALCA		other		-1.29		0.00377	ADD3,AHNAK,COL3A1,EIF4B,LIMA1,LMNA,MKI67,NDRG2,PPP2R5D,RBM14,TNS1	315 (6)
telmisartan		chemical drug	Inhibited	-2.158		0.00379	ACSL1,BAX,CASP3,GPT,ICAM1,MMP9,MRC1,SIRT1	403 (20)
CD24		other	Activated	2.449	bias	0.0039	ADD3,BCLAF1,CTTN,ECM1,FXR1,HSPB8,ICAM1,LPP,N4BP3,SMC4,THBS1,TPR	151 (7)
Tgf beta		group	Activated	2.693		0.00391	ADGRE5,ADH1C,COL12A1,COL4A1,COL4A2,COL5A1,COL6A2,F10,FBLN2,FGG,FN1,HSPG2,IL16,ITGA2,ITGAV,LMCD1,MMP9,POSTN,RHOB,SEC14L2,TGFBI,THBS1,TIMP1,VIM	441 (17)
interferon beta-1a		biologic drug				0.00393	BUB3,CORO1A,EEF1G,IL16,LTF,MMP9,MX1,PFDN5,RAN,RPS27,SERPINA1,SLC25A6,TBCB	67 (3)
IGFBP7	2.829	transporter		-1		0.00398	CASP3,MAPK1,MMP9,PCNA	303 (11)
PCK1	-1.242	kinase		1.964	bias	0.00398	ACADM,EHHADH,MLYCD,PCK1
EDNRA		transmembrane receptor		1	bias	0.00398	COL3A1,ICAM1,ITGAM,TIMP1
ginkgolide B		chemical drug		-1	bias	0.00398	BAX,HTRA2,ICAM1,SIRT1
N-ethyl-N-nitrosourea		chemical toxicant				0.00398	BAX,CRP,ICAM1,SERPINA1
asiatic acid		chemical reagent		-0.187		0.00398	BAX,CDC25C,MMP9,SIRT1	313 (7)
sodium bisulfide		chemical reagent		-0.902		0.00409	BAX,CASP3,CAT,HSP90AB1,ICAM1,LAMC1,PRKCD	401 (17)
Collagen(s)		complex		-0.115		0.00409	CD63,FN1,ITGAM,NCOA5,SERPINH1,THBS1,TNC	233 (8)
SAFB2		other		0.447		0.00409	B2M,BCCIP,EIF4B,PPP1R12A,RBM8A
n-nitrosomethylbenzylamine		chemical toxicant				0.00413	ACTR2,AHNAK,AKR1B10,ANXA2,BAX,CTTN,EIF4G2,HIP1,MAP2K3,PCNA,PDCD10,RAB1A,SCEL,SEPT7
PP2/AG1879 tyrosine kinase inhibitor		chemical - kinase inhibitor		-1.785	bias	0.00418	ACSL4,FN1,GFPT1,ICAM1,ITGAM,RELA,RHOC,SRC,TJP1,VIM	456 (18)
TGFB2		growth factor	Activated	2.856		0.00421	ASPN,CD59,CNN1,COL3A1,DES,FMOD,FN1,HSPG2,MMP9,THBS1,TIMP1,VCAN	431 (17)
IL32		cytokine		1.596	bias	0.00424	BAX,EIF2AK2,ICAM1,ITGAM,MMP9,MX1,PCNA,VIM	372 (16)
NR1H4		ligand-dependent nuclear receptor		0.234		0.0043	ADH1B,APOA1,APOC2,FABP5,FGB,GPT,HNF4A,ITGAM,LCN2,NDRG2,PCK1,PGM1,PSMD10,SDHA,SQSTM1,TIMP1	501 (21)
6-amino-4-(4-phenoxyphenylethylamino)quinazoline		chemical reagent				0.00451	APOE,ITGAV,MMP9	149 (7)
MTBP		other				0.00451	CAD,NCL,NPM1
MIA-602		chemical reagent				0.00451	CASP3,MAPK1,MAPK3
uridine		chemical - endogenous mammalian				0.00451	BDH1,CASP3,EHHADH
Z-LLL-CHO		chemical - protease inhibitor		1.594	bias	0.00467	BAX,CAT,CFL1,CLIC1,CRP,DOCK2,HMGB2,HNRNPA2B1,HSPB1,ICAM1,MMP9,MRTO4,NEDD8,NQO1,PAK2,PARP1,PFN1,RANBP1,RANGAP1,RPS6KB1,SQSTM1,STMN1,SUB1,THBS1,TIMP1,TJP1	426 (16)
GW 4064		chemical toxicant		-0.341	bias	0.00472	ADH1B,APOA1,APOE,FGA,FGB,FGG,PCK1,PCK2	347 (11)
SPP1		cytokine		0.994	bias	0.00479	ARG1,BAX,CAPNS1,FN1,GCDH,GSTZ1,ICAM1,ITGA2,ITGAV,MMP9,NDRG2,PLOD1,PNN,TIMP1,TM7SF2,TXNRD2,VIM	407 (16)
dibutyl phthalate		chemical toxicant		-0.199		0.00493	CYP4A11,FGB,HDAC6,NFKB1,RELA	150 (7)
HEXIM1		transcription regulator				0.00493	HNRNPH1,POLR2A,PTBP1,SRSF6,VIM
ACKR3		G-protein coupled receptor				0.00493	C5,FMOD,IGFBP7,RRAS,VWF	143 (7)
gemfibrozil		chemical drug		0.247		0.00497	ACAA1,APOA1,APOE,CNP,CRP,EHHADH,FGB,NAP1L1,RTN4	459 (22)
thyroid hormone		chemical - endogenous mammalian		-0.763		0.00505	ACSL5,APOA4,APOE,DNAJC3,G6PD,GDI1,GPD2,HSP90AB1,MAPK14,MAPK3,NDUFB5,PCK1,PML,RAD21,S100A10,SSRP1,VIM
Srebp		group				0.00511	ACSL1,CYP4F2,G6PD,NPC1
LGALS3		other		-0.923		0.00519	BAX,CASP3,COL3A1,COL4A1,CTSH,FN1,GPT,ICAM1,ITGAM,ITGAV,LMNB1	394 (15)
IL11		cytokine	Activated	2.391		0.00525	ANXA2,CRP,GP5,ICAM1,LBP,POSTN,TIMP1,VWF	369 (13)
emodin		chemical drug		0	bias	0.00525	ARG1,BAX,FN1,ICAM1,MKI67,MMP9,MRC1,VIM	425 (19)
PDGF BB		complex	Activated	2.471	bias	0.00525	ADD3,ARF5,CNN1,COL18A1,COL3A1,CTH,ENPP1,FBLN5,FLNA,FN1,GBP2,LBP,LMNA,MMP9,NDUFB8,NXF1,PCNA,POSTN,RHOB,SRSF7,SYNE1,THBS1,TIMP1,TNC,TRA2B,VCAN	430 (18)
RXRA		ligand-dependent nuclear receptor	Inhibited	-2.002		0.00525	ACACB,ACADM,ACSL1,ADH1B,ADH1C,APOA1,APOE,CAT,CTSH,CTSS,CYP4A11,ECM1,EHHADH,FABP5,FGG,GPT,HNF4A,LCN2,LTF,MLYCD,PC,PCK1,PCK2,VCAN	488 (19)
TARDBP		transcription regulator		-0.404	bias	0.00545	CASP3,HDAC6,LCN2,RPS6KB1,SQSTM1,TBC1D1
ONECUT1		transcription regulator				0.00556	AASS,ACACB,ADH1B,AMT,APIP,BCKDHA,C2,C8G,CLNS1A,FABP5,G3BP2,GBF1,GRB2,HMGB2,HNF4A,HNRNPA2B1,HNRNPR,IRF6,ITGAV,NDUFAF4,PCK1,SERPINA1,TMF1
CD40LG		cytokine	Activated	2.657	bias	0.00559	AKAP2,AUH,B2M,BAX,CBX3,CD63,CLNS1A,EIF2A,EIF2AK2,ICAM1,ITGAM,MAP2K3,MARCKS,MRE11,MX1,NAP1L1,NFKB1,PML,PRKDC,PTPN1,RAD21,RELA,RIDA,SNX4,TAP1,TAP2,TM7SF2,TPD52L2,TUBB,XRCC5	386 (16)
black raspberry extract		chemical drug				0.00562	ACTR2,AHNAK,AKR1B10,ANXA2,CTTN,EIF4G2,HIP1,MAP2K3,PDCD10,RAB1A,SCEL,SEPT7
Ige		complex	Activated	4.088	bias	0.00568	ABAT,ACSL4,ARG1,BCAT1,CAPN2,CD74,COL18A1,EIF4G2,ENOPH1,GSN,ICAM1,ITGAV,LAMA5,NFKB1,PEA15,PFN1,PIP4K2B,PPIF,RPS6KA3,SNRPD3,SNX1,SRM,TNC,TPM3,VIM,YKT6	417 (15)
MRTFB		transcription regulator	Activated	2.704		0.00568	CNN1,CNN2,COL3A1,ELANE,EPPK1,EPX,F11R,FCN1,FLNA,LCN2,LTF,MYH9,POSTN,THBS1
ritonavir		chemical drug				0.00568	CD59,CFL1,CYP4F2,FGGY,GBP2,HMGB3,ICAM1,MMP9,MVK,PFAS,RACGAP1,SEPT7,TSN,XRCC5	158 (7)
CHI3L1		enzyme				0.00587	COL6A1,COL6A2,MMP9,SLC39A14,TNC	332 (10)
mir-182		microRNA		-1.134	bias	0.0059	FN1,GRB2,RPS6KB1,SLC30A7,SQSTM1,VIM,VWF
KLF15		transcription regulator		-1.816	bias	0.0059	ACADM,ACADS,ACSL1,ATG3,EHHADH,FABP5,MLYCD	258 (6)
aldesleukin		biologic drug		1.633	bias	0.0059	B2M,IFI30,IGKC,MX1,NUP62,TAP1,TAPBP
Lh		complex		0.421		0.0059	ACTR2,CAP2,COL18A1,FKBP5,HSD11B1,MAP2K3,MAPK14,MMP9,PDLIM3,PLIN3,PSIP1,PTPN1,RAB1A,RAB27A,RAB31,RANGAP1,RHOB,STK24,THBS1,THBS2,TPM2	328 (14)
TGFB3		growth factor	Activated	2.293	bias	0.00603	ASPN,CD59,COL3A1,COL5A1,FN1,ITGAV,MMP9,PALLD,THBS1,TJP1,TNC,TNS1	379 (15)
14,15-DHET		chemical - endogenous mammalian				0.00609	CYP4A11,EPHX2
Tropomyosin		group				0.00609	TPM2,TPM3
N4BP2L2		transcription regulator				0.00609	AZU1,ELANE
2-(3-chlorophenylamino)phenylacetic acid		chemical drug				0.00609	COL4A1,FN1
CKLF		cytokine				0.00609	BAX,CASP3
methylamphotericin B		chemical drug				0.00609	LCN2,TIMP1
MADD		other				0.00609	MLPH,RAB27A
mir-431		microRNA				0.00609	FN1,VCAN
PBK		kinase				0.00609	NFKB1,TP53RK
TUBB1		other				0.00609	TUBB,TUBB2A
NPHS2		other				0.00609	CD2AP,TJP1
Col17a1		other				0.00609	ELANE,SERPINA1
DIDO1		other				0.00609	CASP3,ITGAV
natamycin		chemical drug				0.00609	LCN2,TIMP1
mycophenolate mofetil		chemical drug				0.00609	FN1,ICAM1
MitoBloCK-6		chemical drug				0.00609	PCK2,PSPH
5,10,15,20-tetrakis(4-sulfonatophenyl)porphyrinato iron (III)		chemical reagent				0.00609	HMGB1,ICAM1
prostratin		chemical - endogenous non-mammalian				0.00609	CASP3,ICAM1	155 (7)
ROCK2		kinase		1.78	bias	0.00625	CNN1,DES,DSC2,FABP5,ICAM1,SCEL
4-methylnitrosoamino-1-(3-pyridinyl)-1-butanone		chemical toxicant		1.123	bias	0.00625	APOA1,DNMT1,NFKB1,RELA,SERPINA1,TP53I3	359 (12)
NFYA		transcription regulator		1.026	bias	0.00637	CAT,CDC25C,ELANE,HSD17B7,ICAM1,PCK1,PKM,RHOB,UBE2I,VWF
etoposide		chemical drug		1.14	bias	0.00638	BAX,CASP3,CROCC,DHX9,DNMT1,ICAM1,LIMA1,MCM2,PCNA,PFKM,RAN,RELA,SEPT9,SFN,SIRT1,SQSTM1,TOP2B,TP53I3	432 (21)
CCAT2		other		-0.242		0.00645	BAX,CASP3,GLS,VIM
ethyl pyruvate		chemical drug		-1.929	bias	0.00645	BAX,HMGB1,MMP9,TJP1	344 (14)
AFF4		transcription regulator				0.00653	HNRNPH1,PTBP1,SRSF6
KDM6A		enzyme				0.00653	CRIP2,CSPG4,ENO3
nicotiflorin		chemical reagent				0.00653	ICAM1,MMP9,RELA
PRRX1		transcription regulator				0.00653	LPP,PALLD,TNC
SPZ1		transcription regulator				0.00653	FN1,PCNA,VIM	202 (3)
Ccl6		cytokine				0.00653	CTSS,MMP9,SERPINA1
di-spiropyrrolizidino oxindole andrographolide derivative CY2		chemical reagent				0.00653	BAX,CASP3,RELA	358 (11)
FUS	3.68	transcription regulator				0.00653	ICAM1,MECP2,TBL2
UCHL3		peptidase				0.00653	BAX,CASP3,NEDD8
miR-182 inhibitor		chemical reagent				0.00653	BAX,CASP3,RELA
miR-199a-5p (and other miRNAs w/seed CCAGUGU)		mature microRNA		-1.718	bias	0.00654	BCAM,COL4A1,FN1,LCN2,MYL9,NFKB1,RELA,SET,SIRT1
IL1B		cytokine		1.539		0.00666	APOC2,APOE,ARG1,ASS1,B2M,BAX,CASP3,CAT,CD74,CPB2,CRP,CTSS,DNMT1,ENPP1,FABP5,FGB,FGG,FKBP5,FN1,G6PD,GBP2,GNL1,HEXB,HMGA1,HMGB1,HNF4A,HSD11B1,HSPB1,HSPG2,ICAM1,IL16,ITGAM,ITGAV,LBP,LCN2,MAPK14,MMP9,MX1,NFKB1,NQO1,PCNA,PFKP,POSTN,PRKCD,RAN,RELA,RHOB,S100A10,SERPINH1,SIRT1,TAP2,THBS1,THY1,TIMP1,TJP1,TPD52L2,VASP,VCAN,VIM,ZYX	435 (15)
ARNT2		transcription regulator	Activated	3.3	bias	0.0067	APOE,BAG6,BST1,CFL2,CNOT7,COL12A1,ICAM1,LRRFIP1,LTF,MCM7,MRPL37,NAP1L4,PEA15,PFN1,POSTN,SIRT1,SNX5,SRSF1
tunicamycin		chemical - endogenous non-mammalian		1.961	bias	0.0067	CAD,COL6A1,DNAJC3,EIF2A,HSD11B1,ICAM1,MANF,MMP9,NARS,NDRG1,NEDD4L,PCK2,PCNA,PLIN2,SDF2L1,SRP68,TBCB,TJP1	323 (15)
SOD1		enzyme				0.00674	APOE,ASS1,B2M,BAX,CASP3,CKB,DCXR,DPYSL3,HPCAL1,HSBP1,HSPB1,HSPB8,ICAM1,MMP9,PRPH,PTK2B,RBM3,SH3BGRL3,SIRT1,SQSTM1,STMN1	406 (20)
benzo(a)pyrene		chemical toxicant		0.341		0.00676	APOA1,ASPN,BAX,CASP3,COL8A1,CYB5A,DHRS1,G6PD,HSPB1,MAP2K3,NQO1,PCNA,PPCS,PPIF,RHOC,SERPINA1,SOD3,SQSTM1,THBS1	356 (11)
Insulin		group		1.098		0.00679	ACADM,ACSL1,AEBP1,ALDOA,APOA1,APOE,COL3A1,COL4A1,COL5A1,COL6A1,CTH,FGB,FN1,G6PD,HNRNPK,HSD11B1,ICAM1,MCM7,MMP9,PCK1,PCNA,PKM,PLIN3,PPIC,PRKCD,SDHA,SIRT1,SRSF3,TGFBI,THBS1,THBS2,TJP1,TNC,UBTF	428 (20)
nitric oxide		chemical - endogenous mammalian	Activated	2.617		0.00681	BAX,CTSH,DPYSL3,HSP90AB1,HSPG2,MKI67,MMP9,NDRG1,NID1,NQO1,PRKDC,SFN,SQSTM1,THBS1,TP53I3	396 (16)
ERBB3		kinase		-1.457		0.0069	BAX,COL6A1,FBLN2,FN1,HMGB1,LAMA4,NID1,RRAS,THBS1,TNC	400 (19)
IGF2BP1		translation regulator	Activated	2.236		0.00694	COL5A1,COL6A2,COL6A3,SERPINH1,TNC
CCR1		G-protein coupled receptor		1.4		0.00694	CTSS,ITGAM,ITGAV,MMP9,VIM	393 (14)
metribolone		chemical reagent	Activated	2.651	bias	0.00696	ADH1C,ADRM1,AGR2,ALDH1B1,ALDOA,B2M,BAX,FKBP5,GFPT1,MPC2,NDRG1,NDUFB8,NEDD4L,PFKP,PKM,PPA1,PRKCD,RAB27A,SMS,THBS1,THRAP3,TM9SF2,TPD52,VCAN	374 (18)
N-cor		group		-0.547	bias	0.007	ACACB,ACSL1,CRP,CTSS,G6PD,LHPP,MMP9,PCK1,PLIN2,RHOB,SNX1	399 (22)
CSF3		cytokine		0.146		0.00709	ARG1,BAX,CAPG,DES,ELANE,FGB,FUS,HBZ,ICAM1,ITGAM,LBP,LCN2,LTF,MMP9,NME2,RAB27A	394 (16)
carbon monoxide		chemical - endogenous mammalian		-1.51		0.0071	BAX,CASP3,FN1,GPT,HMGB1,ICAM1,MAPK14,NQO1	432 (20)
Akt		group	Activated	2.008		0.00712	BAX,COL3A1,COPS6,FKBP5,FN1,LCN2,LMNA,MMP9,MRE11,NDRG1,NDUFB8,NFKB1,PCK1,PCNA,PEA15,PSMD10,RELA,RHOB,THBS1,THBS2,TJP1,TNC,VCAN	379 (17)
monobutyl phthalate		chemical toxicant		-0.128		0.00715	PCBP1,POSTN,RBM39,SNRPA1,SRSF3,TRA2A
APR-246		chemical drug				0.00715	BAX,IGFBP7,MAP4,MAPK1,PEA15,RANGAP1	322 (7)
NR2F2		ligand-dependent nuclear receptor				0.00715	ALDH2,APOA1,APOA4,HNF4A,LTF,PCK1
ATF4		transcription regulator		0.708	bias	0.0072	BCAT1,CTH,EIF2S2,FN1,GARS,GHITM,HNF4A,IGFBP7,NARS,NDRG1,NID2,PCK1,PCK2,PRKDC,PSPH	241 (8)
NR1H3		ligand-dependent nuclear receptor		1.064		0.00742	ANLN,APOA1,APOC2,APOE,ASPN,CAT,CENPF,CRP,FAM3C,FBP1,GPT,HSD11B1,ITGAL,LSP1,MFGE8,MKI67,MMP9,TAP1,VCAN	344 (17)
4-phenylbutyric acid		chemical - endogenous mammalian		0.102		0.00746	ABCD1,BCKDHA,CASP3,CNP,EHHADH,EIF2S2,GSN,PSMD10,SERPINA1,TCERG1	261 (6)
HNRNPA2B1	1.002	other				0.00766	ACSL5,CPS1,CRIP1,DCLK1,FN1,GSN,HMGB3,HNRNPA2B1,PKM,SERPINA1,SRI,SRSF1,SULT1A1,VCAN
tetracycline		chemical drug		1.723		0.00778	AUH,BCKDHA,DHX29,EXOSC10,EXOSC9,GLUD1,NDRG2,PAK2,POLR2A
NFkB (complex)		complex		1.959	bias	0.00779	ALDH1B1,APOE,BAG2,BAX,BLVRA,CAMK2D,CAPNS1,CD74,COL18A1,CRP,ENPP1,FABP5,FGG,FN1,GBP2,HDAC6,HIP1,HNF4A,HSPB1,ICAM1,IGKC,IGLL1/IGLL5,ITGAL,ITGAM,ITGAV,KYNU,LCN2,LSP1,MBL2,MMP9,NFKB1,NUP62,PEA15,PPIF,PRKCD,RELA,RRAS,SOD3,TAP1,TAP2,TIMP1,VIM,XRCC5	416 (16)
PDGFB		growth factor		1.315		0.00782	CNN1,FN1,ICAM1,MMP9,MYL6,THBS1,TIMP1,TNC	335 (17)
ERK1/2		group		0.893	bias	0.00782	AKR1B10,B2M,BAX,BHMT,CAT,CDC25C,COL3A1,FKBP5,FN1,HMGA1,ICAM1,ITGA2,MAPK1,MAPK3,MMP9,PCNA,PKM,POSTN,RHOC,TAP1,TAP2,TAPBP,TIMP1,VCAN	410 (18)
RNA polymerase II		complex				0.00787	ARG1,B2M,CAP2,FGG,GBP2,GPT,HNF4A,HNRNPU,ICAM1,MAPK1,MMP9,PCK1,PCNA,POLR2A,RBBP4,RPL13A,SFN,SLC27A2,TAP1,TAP2,TAPBP,THBS2	329 (7)
CDKN1B		kinase		-1.929	bias	0.0079	ADGRE5,ANAPC1,B2M,EPB41,HSPB8,ITGAM,MCM5,MCM7,MMP9,PCNA,PES1,SHMT1	401 (16)
oleic acid		chemical - endogenous mammalian		-0.302		0.0079	ACADM,ACSL1,APOE,ARG1,BAX,CYP4F2,ICAM1,LCN2,PCK1,PLIN2,PLIN3,SIRT1	417 (20)
FZD8		G-protein coupled receptor		-0.085		0.00799	FN1,TJP1,VCAN,VIM	320 (7)
ADORA1		G-protein coupled receptor				0.00799	BAX,CASP3,COL3A1,MMP9	221 (7)
BARX2		transcription regulator		1.067	bias	0.00799	ANLN,FLNA,MMP9,TIMP1	54 (5)
superoxide		chemical - endogenous mammalian		1.951	bias	0.00799	FN1,ICAM1,MMP9,TIMP1	388 (16)
pirfenidone		chemical drug		-1.954	bias	0.00799	CAT,COL3A1,FN1,POSTN
NR2F1		ligand-dependent nuclear receptor				0.00812	ACADM,ALDH2,APOA1,APOA4,LTF,PCK1	120 (7)
NEDD9		other		1.709	bias	0.00812	ITGA2,MMP9,PCK1,PFKP,PLIN2,VIM	287 (11)
CDH11		other		1.342	bias	0.00814	LAMA5,PRKCD,PTK2B,SERPINA1,TJP1
IND S7		chemical - kinase inhibitor		-1.342		0.00814	GLUD1,KHSRP,PCK2,TUBB,VIM
NR4A3		ligand-dependent nuclear receptor		-1.432		0.00858	AASS,BAX,COL6A1,COL6A2,ENO3,FBP1,NDUFB8,NQO1
palmitic acid		chemical - endogenous mammalian		-0.519		0.00889	ACAA1,ACADM,ACSL1,ALDOA,BAX,CASP3,CYP4F2,EPHX2,FN1,G6PD,HNF4A,ICAM1,LCN2,PCK1,PFKM,PLIN2,PTPN1,SIRT1,SQSTM1	400 (17)
SIM1		transcription regulator	Activated	3.3	bias	0.00891	APOE,BAG6,BST1,CFL2,CNOT7,COL12A1,ICAM1,LRRFIP1,LTF,MCM7,MRPL37,NAP1L4,PEA15,PFN1,POSTN,SIRT1,SNX5,SRSF1
LINC01139		other				0.00902	ALDOA,MAPK1,PKM
TRPM8		ion channel				0.00902	CIRBP,GPX2,RBM3
miR-125b-2-3p (and other miRNAs w/seed CAAGUCA)		mature microRNA				0.00902	API5,BAX,MMP9
TP53BP2		other				0.00902	BAX,TP53I3,VIM	354 (11)
(5-(4-N-methyl-N(2-pyridyl)amino)ethoxy)benzyl thiazolidine-2,4-dione		chemical reagent				0.00902	CTSS,ITGAM,PC
AG490		chemical - kinase inhibitor	Inhibited	-2.956	bias	0.00937	BAX,CASP3,CTTN,DUOX2,HMGB1,ICAM1,MMP9,PCNA,S100A10,TIMP1	360 (17)
NEUROG1		transcription regulator		-1.414		0.00941	ADD3,ASS1,COL3A1,FN1,MMP9,PPIC,THBS1,TRIM22
folic acid		chemical - endogenous mammalian		-0.816		0.00941	COL18A1,COL3A1,DNMT1,FN1,HDAC6,MMP9,PCNA,RELA	360 (17)
SMTNL1		other		-1.342	bias	0.00947	AGL,HSP90AB1,PFKM,PPP1R12A,PYGM
THBS4		other		1.109		0.00947	COL3A1,ICAM1,MANF,SDF2L1,TNC
silymarin		chemical drug				0.00947	CAT,GPT,ICAM1,MMP9,RELA	396 (16)
ERK		group		1.725	bias	0.0096	ACSL5,BAX,COL3A1,CTTN,EIF2AK2,FN1,HMGA1,ICAM1,ITGAM,ITGAV,KYNU,LCN2,MMP9,NDRG1,POSTN,SFN,THBS1,TIMP1,VASP,VCAN	409 (18)
SYVN1		transporter		1.941	bias	0.00967	AES,BCAT1,CRTAP,CSPG4,CTPS1,GNB2,HNRNPM,HSPB1,ITGAV,PCBP1,PFN1,POLR2B,PTBP1
Growth hormone		group		-1.717		0.00971	ACAA1,ACSL1,APOE,CAT,COL18A1,COL3A1,CTH,FGG,FKBP5,FN1,G6PD,GCDH,GLUD1,GPT,MMP9,NDRG2,PCK1,PCNA,SIRT1	421 (20)
CREB3L3		transcription regulator		1.184	bias	0.00977	APOA4,APOC2,CRP,PCK1
PTP4A3		phosphatase		0.651		0.00977	CSK,FN1,PCBP1,STMN1
leuprolide		biologic drug		0.13		0.00977	BAX,MMP9,PEA15,TIMP1	256 (7)
mir-29		microRNA	Inhibited	-2.184	bias	0.00996	COL3A1,COL4A2,DNMT1,FKBP5,FN1,GLDC,NASP,NID1,THBS1	342 (13)
acetaminophen		chemical drug		1.02		0.0101	ACADM,BCKDHA,CASP3,CAT,CPS1,CRP,CYP4A11,GLUD1,GPT,ICAM1,NDRG2,NQO1,PCNA,PTPN1,SLC27A2,TUBB
BAX	2.598	transporter		1.912	bias	0.0101	BAX,CASP3,CDC25C,CTSH,CTSS,MMP9,TIMP1
26s Proteasome		complex		-1.666		0.0102	ADRM1,ARG1,BAX,HMGB2,HSBP1,HSPB8,ICAM1,IGLL1/IGLL5,NFKB1,PRKDC,SQSTM1,SRC,UBE2I,VIM
PRKCA		kinase	Activated	2.746	bias	0.0102	CSTA,FN1,GBA,ICAM1,MMP9,NFKB1,NQO1,PML,PRKCD,SDCBP,SEC23IP,UBAP2L
celecoxib		chemical drug		-1.077		0.0102	BAX,CASP3,CENPF,CRP,DES,ICAM1,MKI67,MMP9,PCNA,RELA,RPA3,SLC25A6
halofuginone		chemical drug				0.0102	ADD3,ANXA4,CKB,EHD3,FBLN5,GYG1,LTBP1,MMP9,PKM,PTK2B,SCPEP1,STEAP3,TIMP1
caffeine		chemical drug		1.363		0.0103	CASP3,CAT,CDC25C,LMNB1,SRSF2,SRSF3,THBS1,VIM
HOTAIR		other	Activated	2.424		0.0104	ATG3,DNMT1,ICAM1,MAPK1,MMP9,MX1
Vegf		group	Activated	2.102	bias	0.0107	ANP32A,BAG2,BAX,CASP3,CDC25C,CENPF,CNN1,COL4A3,CYP4A11,DKC1,DTYMK,FKBP5,FLNA,FN1,ICAM1,ITGA2,KIF11,LCN2,MAP2K3,MAPK14,MCM2,MCM5,MKI67,MMP9,NFKB1,NID2,NPC1,PABPN1,PC,SFN,TIMP1,TJP1,TNC,VIM,VWF
SP3		transcription regulator		1.575	bias	0.0107	ACSL1,ADD3,AEBP1,CD2AP,EIF2AK2,F10,ITGA2,NFKB1,PKM,PRKCD,PTPN1,RELA,RRAS,SERPINH1,SRC,TIMP1,TNC,VIM
ciglitazone		chemical drug		-0.047		0.0108	APOE,BAX,CAT,FN1,GSN,ICAM1,LCN2,MMP9,PARP1
dehydroisoandrosterone		chemical - endogenous mammalian				0.0108	APOA4,B2M,CYP4A11,ECM1,FKBP5,HSD11B1,HSP90AB1,ICAM1,TAP2
H2AFZ		other				0.0109	APOA1,HNF4A,MCM2,MCM7,TOMM40
glycyrrhizic acid		chemical drug		1		0.0109	APOA1,CASP3,HMGB1,RELA,VWF
MAP3K1		kinase	Activated	2.619	bias	0.0112	COL3A1,COL4A1,CSTA,HSPB1,THBS1,TIMP1,TNC
ELAVL1		other	Activated	2.093	bias	0.0112	ARF5,B2M,CTSS,FLNA,HNRNPD,HSPA2,IFITM3,JCHAIN,KHSRP,KIF11,NCL,NDUFB8,NXF1,SIRT1,SRSF7,TJP1,VIM
S100A4		other		0.714	bias	0.0116	BAX,FN1,MMP9,THBS1,TIMP1,VIM
CXCL8		cytokine		-0.122		0.0116	BAX,CD74,COL12A1,COL18A1,HSPG2,ICAM1,ITGAL,ITGAM,MMP9
CSF1		cytokine		0.658	bias	0.0117	ADGRE5,APOE,ARG1,BAX,FN1,GLS,GOT2,GPT,HSD17B7,ITGAM,ITGAV,LBR,MMP9,MRC1,MVK,PCNA,PKM,THBS1
11,12-epoxyeicosatrienoic acid		chemical - endogenous mammalian		-1.091		0.0118	CYP4A11,EPHX2,ICAM1,MMP9
puromycin		chemical - endogenous non-mammalian				0.0118	CASP3,IPO7,RBM3,UBTF
peoniflorin		chemical drug		1.177		0.0118	CASP3,CLTA,PPIF,TUBB
mir-96		microRNA		0	bias	0.0118	FN1,GRB2,SLC30A7,VIM
GABPB1		transcription regulator				0.0118	ELANE,IL16,RRAS,TNC
BID		other		1	bias	0.0118	CTSH,CTSS,GPT,TIMP1
ADRB1		G-protein coupled receptor				0.0118	ANXA4,COL3A1,SMC4,THBS1
HNRNPA1	1.442	enzyme				0.0118	EIF2AK2,FGG,HNRNPA1,PKM
13(S)-hydroxyoctadecadienoic acid		chemical - endogenous mammalian				0.0118	MAPK1,MAPK3
6-dimethylaminopurine		chemical - endogenous mammalian				0.0118	ICAM1,MAPK1
repertaxin		chemical drug				0.0118	ITGAM,MMP9
SHP		group				0.0118	DNMT1,PCK1
ITPR		group				0.0118	MAPK1,MAPK3
Metalloprotease		group				0.0118	FN1,ITGAM
benoxaprofen		chemical drug				0.0118	CYP4A11,EHHADH
A2E		chemical - endogenous mammalian				0.0118	CASP3,NPC1
GNL3L		other				0.0118	BAX,YWHAB
NFX1		transcription regulator				0.0118	HSD17B7,NFKB1
RRM2		enzyme				0.0118	MMP9,THBS1
NUP133	-1.548	other				0.0118	NUP107,TPR
PKIA		other				0.0118	FN1,PCK1
MIR129		group				0.0118	MAPK1,MAPK3
mir-138		microRNA				0.0118	LCN2,VIM
CELF2		other				0.0118	BAX,SIRT1
CTNNAL1		other				0.0118	FN1,ITGAV
ANGPTL3		growth factor				0.0118	AGRN,HSPG2
IRAK1BP1		other				0.0118	NFKB1,RELA
PODXL		kinase				0.0118	MMP9,VIM
NOC2L		transcription regulator				0.0118	BAX,TP53I3
ethanol		chemical - endogenous mammalian		0.948		0.0118	ACADM,ADH1C,APOA1,BAX,BHMT,CAPN5,CASP3,CAT,COL3A1,CRP,CYP4A11,GPT,HAO2,HSBP1,HSP90AB1,ICAM1,IL16,ITGAM,MMP9,NQO1,PARP1,PCK1,PCNA,RELA,RHOB,SERPINA1,SIRT1,TIMP1
L-serine		chemical - endogenous mammalian				0.012	PCK2,PCNA,PSPH
naringin		chemical - endogenous non-mammalian				0.012	BAX,CAT,MMP9
astragalin		chemical - endogenous non-mammalian				0.012	ICAM1,MMP9,RELA
3,5-diiodothyronine		chemical - endogenous mammalian				0.012	ENO3,IDH3A,PGM1
pioglitazone		chemical drug		-0.065		0.0122	APOA1,APOA4,APOE,BAX,CASP3,CAT,FBP1,FN1,ICAM1,ITGAM,MMP9,NCEH1,PC,PCNA,PLIN2
mir-15		microRNA		-1.501		0.0122	DICER1,EIF4G2,MAPK3,MMP9,MX1,PCNA,SIRT1,TIMP1
platelet activating factor		chemical - endogenous mammalian		0.659	bias	0.0124	FN1,ICAM1,ITGAM,MMP9,THBS1,TIMP1,VIM
CAT	-1.273	enzyme		-1.549	bias	0.0124	BAX,FN1,MMP9,THBS1,TIMP1,TNC,VIM
forskolin		chemical toxicant	Activated	2.134	bias	0.0125	ACTR2,AGL,AKR1B10,ALDOA,APOA1,CAP2,CNN1,CNP,COL18A1,CTTN,DUOX2,ECM1,EMD,FBLN5,FKBP5,FN1,HSD11B1,HSD17B7,ICAM1,LTF,MAP2K3,MAPK1,MAPK3,MFGE8,MMP9,NPC1,PCK1,PCNA,PDLIM3,PLIN3,PPM1F,PTPN1,RAB27A,RAB31,RANGAP1,RHOB,RPL37A,S100A10,STK24,TAGLN2,THBS1,TIMP1,TJP1,TPM2,VCAN,VIM
alitretinoin		chemical drug		-0.536		0.0126	ACACB,ACADM,ANXA5,APOA1,CYP4F11,CYP4F2,FN1,HNF4A,ITGAM,LTF,MKI67,MLYCD,MMP9,VIM
FECH	-1.91	enzyme				0.0126	APOA4,COL3A1,COL4A1,COL6A3,CYP4A11
CNOT7	-2.908	transcription regulator				0.0126	B2M,CSTA,OAS3,TAP1,TAP2
VTN		other		0.898		0.0126	ITGAM,ITGAV,MMP9,S100A10,SFN
betulinic acid		chemical drug				0.0126	BAX,LMNB1,MMP9,PKM,TIMP1
bisindolylmaleimide I		chemical - kinase inhibitor	Inhibited	-2.731	bias	0.0129	APOA1,CDC25C,FN1,HSP90AB1,ICAM1,MAPK1,MAPK3,MMP9,PCNA,PRKCD,TJP1
BDNF		growth factor		-0.908		0.0131	ACOT7,AGRN,ANXA2,ANXA5,AP3D1,CASP3,CSPG4,DPYSL3,FLNA,FLNB,GPS1,HSPA2,LAMC1,LCN2,MAPK1,MYO6,PCNA,PTBP1,RPL37A,S100A10,SERPINH1,THBS1,TM9SF2,VIM
TRAF2		enzyme		0.552		0.0135	ANXA4,CARMIL1,CDC25C,ICAM1,MMP9,NDRG1,NFKB1,PYGL,RELA
zinc		chemical drug		1.257		0.0135	AKR1B10,ASPG,BAX,CAT,CNN1,HNF4A,NDUFB8,NPM1,SLC30A7
REL		transcription regulator	Activated	3.342	bias	0.0136	ACSL4,AGA,AGPS,ANLN,B2M,CAMK2D,CD59,COPS4,CRKL,FN1,ICAM1,IRF6,KPNA3,MMP9,NFKB1,PCBP4,PFKM,RELA,VIM
valproic acid		chemical drug		0.096		0.0136	ADRM1,APOA1,APOA4,BAG2,CACYBP,CAP2,CASP3,CAT,CTPS1,CYP4A11,DICER1,DNAJC3,EHHADH,GINS3,HNRNPA1,ICAM1,LBR,LIMA1,MECP2,MRPS2,MVK,NQO1,OSBPL8,PRKCD,PSME3,SERPINH1,SQSTM1,SRSF1,TES,THBS1,TMPO,TNS1,TRA2B
Ras homolog		group				0.014	IL16,ITGAV,MMP9,TJP1
Aldose Reductase		group		0.277	bias	0.014	G6PD,ICAM1,ITGAM,PCNA
MAT1A		enzyme		-1.103		0.014	APOA1,BAX,CYP4A11,PCNA
NR6A1		ligand-dependent nuclear receptor				0.014	GLS,GPD2,LMNA,VIM
2-mercaptoacetate		chemical drug				0.014	ANXA2,ICAM1,MFGE8,S100A10
mangiferin		chemical - endogenous non-mammalian				0.014	BAX,ICAM1,MMP9,NQO1
linalool		chemical - endogenous non-mammalian				0.014	ACSL1,APOA1,ECHS1,PCK2
STK11		kinase		0.728		0.014	AKAP2,ALDOA,ARF5,ASS1,COL3A1,CPS1,CTPS1,DNMT1,ENOPH1,FGG,FN1,GOT2,MMP9,NDUFB11,NME2,PCK2,PGM1,PKM,PPA1,SARDH,SRM,USP19
NOS2		enzyme		0.106		0.0141	API5,BAX,CASP3,COL4A1,G6PD,GPT,HMGB2,LCN2,MCM5,MMP9,PC,PCNA,RELA,SERPINH1,THY1,TIMP1
ETV5		transcription regulator		0.378		0.0143	AGRN,AHNAK,BAX,COL4A3,FN1,ICAM1,LCN2,PKP4,RAB27A,TJP1
PRKCZ		kinase		0.64	bias	0.0144	BAX,CASP3,MAPK1,MAPK3,MMP9
bromobenzene		chemical toxicant		0		0.0144	BHMT,HSPB1,NFKB1,NQO1,RPL35,RPS6KB1,TIMP1,YWHAQ
miR-483-3p (miRNAs w/seed CACUCCU)		mature microRNA		-1.44	bias	0.0145	CENPF,HMGB3,HNRNPA0,LBR,MKI67,RAN
RAC2		enzyme				0.0145	ALDOA,CD74,GNB2,NFKB1,PKM,ZYX
paclitaxel		chemical drug		0		0.0146	ALDH1L1,ANXA5,BAX,CNP,CRP,CYP4F2,DNMT1,EEF1E1,FLNA,HMGB3,HSP90AB1,ICAM1,MKI67,MMP9,PARP4,PCNA,PLIN3,RBM3,SLC12A2,STMN1,TAP2,THBS1,YBX1
GNA15		enzyme				0.0146	ADD3,ARG1,CTH,ENPP1,FBLN5,GBP2,LBP,NFKB1,SYNE1,TIMP1,VCAN
HMGB1	1.082	transcription regulator		1.034	bias	0.0146	BAX,CASP3,CD58,HMGB1,ICAM1,MMP9,MRC1,MX1,SIRT1
3,4,5,3',4'-pentachlorobiphenyl		chemical toxicant		0.513		0.0146	CAP2,CAT,CYB5A,DNMT1,GRHPR,HSPA2,NQO1,TNC,UGT2B7
atorvastatin		chemical drug		-1.528		0.0147	APOA1,APOE,CAT,CD59,CRP,HMGB1,HSD17B7,ICAM1,ITGAL,MAPK1,MAPK3,MMP9,MVK,POSTN,RHOB,SOD3,TM7SF2
MAPKAPK2		kinase		-0.436	bias	0.0149	ARG1,HSPB1,HSPB6,HSPB8,ICAM1,MMP9,MRC1
niacinamide		chemical - endogenous mammalian		0.154		0.0149	BAX,G6PD,ICAM1,ITGAM,MMP9,PARP1,SIRT1
Il8r		group				0.0154	BAX,ITGAM,MMP9
AFAP1-AS1		other				0.0154	PFN1,RAB11B,RHOC
CCAT1		other				0.0154	CASP3,PCNA,VIM
DDB2		other				0.0154	BAX,EIF2AK2,MMP9
CLCA2		ion channel				0.0154	CASP3,FN1,VIM
C9		other				0.0154	COL3A1,FN1,ICAM1
MAPKAPK3		kinase				0.0154	HSPB1,HSPB6,HSPB8
trientine		chemical drug				0.0154	COL3A1,FN1,SOD3
triptolide		chemical drug		-0.647		0.0156	BAX,CASP3,ICAM1,MKI67,NFKB1,PCNA,POLR2A,RELA
FGF19		growth factor				0.0157	ACACB,ACSL1,APOE,ENO3,FABP5,FBP1,LCN2,SERPINA1,TCEA1
mir-8		microRNA		-1.518	bias	0.0159	BAX,BST1,CRTAP,CUL3,DNAJC3,FN1,HMGB1,PPM1F,RPS6KB1,SIRT1,SQSTM1,VIM,YWHAB
thymoquinone		chemical drug		-1.715		0.0161	BAX,CASP3,CAT,COL3A1,MMP9,PKM
GPX1		enzyme		-1.27	bias	0.0161	CAT,GPX2,ICAM1,MMP9,NDUFB8,RELA
cephaloridine		chemical drug		1.163	bias	0.0163	AKR1B10,APOA4,FCN1,FGB,G6PD,HNRNPUL1,MCM5,NQO1,NUP93,RAB31
KDM5A		transcription regulator		-0.577	bias	0.0163	BCKDHA,GHITM,HSBP1,MAP2K3,MCM2,MLYCD,MRPL11,MRPL12,MRPL53,NDUFB8,RPS6KB1,TOMM22
sulforafan		chemical drug		0.455		0.0163	AKR1B10,BAX,CASP3,CDC25C,DNMT1,GPX2,ICAM1,MMP9,NQO1,PML,RELA,VIM
TGM2		enzyme	Activated	2.412		0.0164	CAD,CD74,EHD1,FN1,GCA,HIP1,ITGAM,LSP1,MDN1,MMP9,OAS3,RPF2,SDCBP,SLC27A2,TAP1,THBS1,TRIM22,WDR3
NUPR1		transcription regulator	Inhibited	-3.087		0.0165	AGRN,ANP32A,ANP32E,API5,CARMIL1,CD63,CDC25C,CHD4,COL3A1,GBP2,HIST1H1B,HNRNPA2B1,HNRNPM,HSPA2,KANK2,KIF11,LBR,LMNB1,MKI67,MMS22L,NDRG1,NSL1,PARP1,PEA15,RBM14,RPA1,SAFB,SPATS2L,SRGAP2,SRSF1,SUOX,TMPO,WASHC5,WDR91
branched chain amino acids		chemical drug		-1.732	bias	0.0165	CASP3,COL3A1,PCNA,TIMP1
LINC00963		other		1.257		0.0165	BAX,FN1,ICAM1,PCK2
PLA2G6		enzyme		-0.152		0.0165	ARG1,MRC1,NFKB1,RELA
PTPN3		phosphatase	Activated	2	bias	0.0165	FN1,ITGAV,MMP9,TGFBI
LCN2	-1.86	transporter		1.534		0.0168	ACTL6A,ANLN,ARG1,BAX,CAPG,KIF11,MRC1,TAGLN2,VIM
tyrphostin AG 1478		chemical - kinase inhibitor		-1.078	bias	0.0169	COL8A1,GFPT1,ICAM1,ITGA2,ITGAM,MMP9,RELA,S100A10
LEP		growth factor		1.133		0.0174	ACADM,ACSL5,APOA1,APOA4,ASS1,BAX,CASP3,CD63,COL3A1,COL4A1,CPS1,CRP,CYB5A,CYP4A11,EHHADH,EPHX2,ETFDH,FMO5,GOT2,ICAM1,ITGAM,KHDRBS1,PCK1,PCNA,PLIN2,PPP1CA,PRKAB2,PTPN1,THBS1,TIMP1,VIM
JAK2		kinase	Activated	2.407	bias	0.0177	BAX,DCXR,F10,GBP2,ICAM1,JCHAIN,LCN2,PCBP4,PFN1,SERPINH1,SET,TAP1,THBS1
1810019D21Rik		other		-0.378		0.0178	ASS1,COL6A1,COL6A2,COL8A1,ITGA2,MMP9,SYNE1
PROC		peptidase		-0.858		0.0178	F2,ICAM1,MMP9,PCNA,THBS1,TJP1
D-fructose		chemical - endogenous mammalian		1.605	bias	0.0178	COL3A1,FN1,ICAM1,ITGAM,THBS1,TIMP1
NR1I2		ligand-dependent nuclear receptor		0.851		0.0179	ADH1C,APOA4,APOC2,BHMT,CAT,CTH,CYP4A11,FMO5,GLUD1,HNF4A,LCN2,LTBP1,NAT8,RELA
RHOA		enzyme		0		0.018	ANLN,BAX,COL3A1,FN1,ICAM1,MMP9,NFKB1,RHOB,RHOC
genistein		chemical drug		1.271		0.0182	AGA,APOA1,ARG1,BAX,CASP3,CAT,CD74,CDC25C,CTSH,CYP4F2,DNMT1,GBA,GFPT1,HEXB,ICAM1,LBP,LTF,MAN2B1,MMP9,NFKB1,NPC1,PCNA,POLR2A,RELA,SCPEP1,SGSH,SQSTM1,TPD52
heparin		chemical - endogenous mammalian		-0.059		0.0182	ACADM,APOE,CNN1,FN1,ICAM1,MMP9,SDHA,VIM
PAK1		kinase				0.0184	FN1,ITGAM,MAPK14,MMP9,PFKM
green tea polyphenol		chemical drug		-1.98		0.0184	BAX,CASP3,HMGB1,ICAM1,MMP9
daunorubicin		chemical drug		0.152		0.0184	BAX,EPS8,PFKM,TAP1,TAP2
fisetin		chemical toxicant		0	bias	0.0184	BAX,ICAM1,MMP9,PCK1,VIM
epigallocatechin-gallate		chemical drug	Inhibited	-2.197		0.0185	BAX,CASP3,CAT,COL18A1,DNMT1,EPX,FN1,GDI1,HMGB1,ICAM1,ITGAV,MKI67,MMP9,PCNA,RELA,TAP1,TIMP1,VIM
TCF7L2		transcription regulator	Activated	2.006	bias	0.0189	ACAA1,ACSL1,ANLN,C5orf51,CNP,CSRP1,EHHADH,ERBIN,FBP1,GSN,HSPA2,KIF5B,LTV1,MYO6,NPC1,PCK1,PLEKHG3,RAB31,RHOG,SLC12A2,SLC27A2,SRSF1,SYPL1,TNS1
AOPEP		peptidase				0.0191	BAG2,RELA
Integrinα		group				0.0191	ITGAL,ITGAM
(-)-gossypol		chemical drug				0.0191	CASP3,PCNA
Ho		group				0.0191	ICAM1,ITGAM
lupeol		chemical drug				0.0191	NFKB1,RELA
ETHE1		enzyme				0.0191	BAX,TP53I3
ENTPD5		enzyme				0.0191	GPT,PRKCD
ZDHHC2		enzyme				0.0191	TJP1,VIM
PHF6		transcription regulator				0.0191	POLR2A,UBTF
TRA2B	1.038	other				0.0191	NQO1,PPP1R12A
GLS	3.26	enzyme				0.0191	FN1,GLS
PPP1R13B		phosphatase				0.0191	BAX,TP53I3
PFN1	1.064	other				0.0191	ANXA2,SQSTM1
NME3	1.947	kinase				0.0191	ITGA2,VIM
GTF2H4		transcription regulator				0.0191	CAD,NCL
TFDP2		transcription regulator				0.0191	SMC1A,TOP2B
SRSF6	1.662	other				0.0191	LMNA,TNC
Wfdc17		other				0.0191	ARG1,MRC1
CLDN2		other				0.0191	ITGA2,MMP9
vinyl carbamate		chemical toxicant				0.0191	GPT,PCNA
Collagen type V		complex				0.0191	ITGA2,ITGAV
orantinib		chemical drug				0.0191	CASP3,ICAM1
pergolide		chemical drug				0.0191	BAX,CASP3
NR0B2		ligand-dependent nuclear receptor		0.574	bias	0.0193	ACADM,APOA1,ARG1,FBP1,GPT,HNF4A,PCK1,PCK2,TIMP1
miR-30a-3p (and other miRNAs w/seed UUUCAGU)		mature microRNA	Inhibited	-2	bias	0.0193	ARMC8,LIMA1,RAB8B,THBS1
CETP		enzyme		-0.911		0.0193	APOA1,APOE,PLIN2,PLIN3
D-alpha-tocopheryl succinate		chemical reagent				0.0194	CASP3,MAPK1,MAPK3
Mmp		group				0.0194	ITGAM,MMP9,TJP1
Pdgfr		group				0.0194	FN1,TNC,VIM
PLA2G2D		enzyme				0.0194	ARG1,ITGAM,MRC1
RYR2		ion channel				0.0194	COL8A1,PCK1,SIRT1
mir-127		microRNA				0.0194	ARG1,MRC1,MRC2
XRCC5	1.447	enzyme				0.0194	APOE,FKBP5,NFKB1
AK1		kinase				0.0194	ENO3,GLUD1,PKM
PRKAA1		kinase	Inhibited	-2.892		0.0195	ACOT7,BAX,CAT,CENPF,FKBP5,FN1,MLYCD,MMP9,NDRG2,SIRT1,TJP1,TNS1,ZYX
metformin		chemical drug	Inhibited	-2.011		0.0196	ARG1,BAX,CASP3,CRP,DICER1,FN1,MMP9,MX1,PCK1,PEA15,PKM,PLIN2,SIRT1,VWF
TFAP2A		transcription regulator		-0.174		0.0196	APOE,BAX,DCLK1,EFEMP1,G3BP2,MCM5,MMP9,STX7,TIMP1,TPM3
F2R		G-protein coupled receptor	Activated	2.789	bias	0.0196	CASP3,FBP1,FN1,ICAM1,IGFBP7,MMP9,THBS1,TJP1,VIM,VWF
GFI1		transcription regulator	Inhibited	-2.778	bias	0.0196	AZU1,BAX,EIF2AK2,ELANE,HSP90AB1,ICAM1,MAPK3,NFKB1,RELA,SERPINA1
GW501516		chemical drug		0.625	bias	0.0196	ACAA2,ACADM,ACSL1,ACSL4,CAT,COL5A1,COL6A1,LTF,PLIN2,THBS1
obeticholic acid		chemical drug	Inhibited	-2.177		0.0197	APOA1,FN1,ICAM1,PCK1,RELA,TIMP1
ADRA1D		G-protein coupled receptor				0.0197	COL3A1,FABP5,FN1,PCNA,TMPO,UBTF
KLF2		transcription regulator		-1.452		0.0204	ASS1,CNP,COL4A1,CRP,DOCK2,ECM1,FBLN1,LBP,MVP,NDRG1,NQO1,RELA,THBS1,TIMP1,VWF
ING1		transcription regulator		0.492		0.0207	AES,BAX,CTTN,DEK,ITSN2
streptozocin		chemical drug		0.8		0.0208	BAX,CAT,COL12A1,COL3A1,COL4A1,CYP4A11,FN1,HNF4A,HSPG2,ICAM1,LMNB1,MMP9,NQO1,PCK1,RELA,RPS6KA3,SOD3,VIM
mitomycin C		chemical drug	Activated	2.619	bias	0.021	ALYREF,BAX,CASP3,NQO1,SRSF5,SRSF6,SRSF7
filgrastim		biologic drug		-0.392		0.0211	ACSL1,ACSL4,AES,AZU1,B2M,CD59,CD74,DDAH2,DPYSL3,ERLIN1,FABP5,FBP1,FKBP5,HIP1,HMGA1,IGKC,ITGAM,MAPK14,MCM7,MMP9,MVP,MX1,OAS3,RPS6KA3,S100A10,SGSH,SQSTM1,SSRP1,SULT1B1,VIM
cholic acid		chemical - endogenous mammalian	Activated	2.137		0.0212	APOA1,APOC2,CIRBP,CYP4A11,EHHADH,FBP1,MVP,PCK1
ADAM12		peptidase		0		0.0212	AEBP1,COL4A2,COL6A3,DPT,LAMA5,NID2,TGFBI,VWF
cyclophosphamide		chemical drug	Activated	2.621	bias	0.0212	CAT,FGA,FGB,GPX2,RBM3,S100A11,THBS1,TIMP1
cadmium		chemical toxicant		1.134		0.0212	ACAA1,AGXT2,B2M,BAX,CASP3,CYB5A,HNRNPK,TIMP1
N-formyl-Met-Leu-Phe		chemical reagent				0.0216	ACTL6A,ANLN,CAPG,ITGAM,KIF11,TAGLN2
MYOCD		transcription regulator		-0.018	bias	0.022	CASP3,CNN1,COL3A1,DES,EIF2A,FN1,LPP,PDLIM3,VCAN
caffeic acid phenethyl ester		chemical drug		-0.551	bias	0.0221	BAX,CASP3,HSPB1,ICAM1,MKI67,NFKB1,NQO1,PCNA,RHOB,VIM
DMD		other		1.387		0.0222	CFL2,COL3A1,CTSS,DES,GAN,HSPB6,NDRG2,PFKM,PKM,POSTN,PYGM,S100A10,SERPINA1,SGSH,TBC1D4,TPM3,VIM
LDLR		transporter		1.4		0.0222	ANLN,APOE,ASPN,CENPF,FABP5,FAM3C,G6PD,GPT,HSPG2,ICAM1,LCN2,LSP1,MFGE8,MKI67,MMP9,TAP1,VCAN
IRF1		transcription regulator	Activated	2.283	bias	0.0223	B2M,BAX,CASP3,CTSS,EIF2AK2,GBP2,IFITM3,MMP9,MX1,PCNA,PML,TAP1,TAP2,TAPBP,TRIM22
DRAP1	13.344	transcription regulator				0.0223	HIST1H1B,ILF2,RPS27,RRAS
Fus		transcription regulator	Activated	2	bias	0.0223	HIST1H1C,HNRNPH1,KANK2,PNN
GW7647		chemical drug		0	bias	0.0223	MLYCD,NPC1,PLIN2,SLC27A2
L-triiodothyronine		chemical - endogenous mammalian		0.618		0.0228	ACSL1,APOA1,APOC2,BAX,CAD,COL4A1,CTH,CTSH,CYP4A11,EHHADH,F2,FGA,FUOM,G6PD,GPD2,HSD11B1,ITGAV,LMNA,MMP9,NID1,PARP1,PCK1,PCK2,PDLIM3,PYGL,SRM,TMF1
IRF3		transcription regulator		1.824	bias	0.0228	ADAR,AHNAK,ANXA4,B2M,CD58,EIF2AK2,FN1,IFITM3,LCN2,MMP9,OAS3,PAH,PML,TAP1,TMPO,VIM
amiodarone		chemical drug		-1	bias	0.0231	BCKDHA,CYP4A11,GLUD1,ICAM1,NDRG2
chondroitin sulfate A		chemical - endogenous mammalian				0.0239	CASP3,MMP9,TIMP1
CBS/CBSL		enzyme				0.0239	APOA1,CASP3,GOT2
LOXL2		enzyme				0.0239	FN1,MMP9,VIM
miR-132-3p (and other miRNAs w/seed AACAGUC)		mature microRNA				0.0239	MECP2,MMP9,TJP1
PIAS3		transcription regulator				0.0239	FGG,MMP9,RELA
PRDX1		enzyme				0.0239	ARG1,BAX,ECM1
COL6A1	1.245	other				0.0239	ALDOA,ENO3,TNC
GTF2I	2.453	transcription regulator				0.0239	CAT,SIRT1,THBS1
cetrorelix		biologic drug				0.0239	ANXA5,BAX,PCNA
E64d		chemical - protease inhibitor				0.0239	CD74,ITGAM,SQSTM1
ADCYAP1		other		-0.401		0.0242	ADD3,BAG2,BCAM,CFL1,CNN3,COL3A1,COL5A1,GALNT7,ITGAM,MCM2,NECAP2,NQO1,POSTN,RELA,RHOB,S100A10,TGFBI,TMPO
ARNT		transcription regulator		1.067	bias	0.0244	ALDOA,G6PD,HNF4A,ITGAV,MYL6,NQO1,PCK2,RANBP1,RANGAP1,TP53RK,VIM
PARP1	1.276	enzyme		0.646	bias	0.0244	BAX,COL3A1,FKBP5,GBP2,ICAM1,ITGAL,MMP9,PARP1,PFDN1,RELA,RPA1
cerivastatin		chemical drug		-0.04		0.0244	APOA1,ASS1,CNP,FN1,HSPB1,ICAM1,ITGAL,MMP9
AICAR		chemical - endogenous mammalian		-0.853		0.0244	ARG1,BAX,CASP3,FN1,HSD11B1,MKI67,MMP9,TP53I3
cycloheximide		chemical reagent		0.887		0.0247	ALDOA,APOA1,ASS1,B2M,BAX,CAT,CDC25C,COL5A1,CYP4A11,DTYMK,EIF4B,FN1,HNF4A,HSD11B1,ICAM1,ITGAM,LCN2,NPM1,NQO1,RBM3,RHOB,SIRT1,SRSF7,THBS1,TIMP1,TRA2A
FGF8		growth factor		-1.129		0.025	COL18A1,CRIP1,DDAH2,DUSP23,MKI67,NAP1L1,SUB1,THBS1,TM7SF2
mir-124		microRNA		-0.371	bias	0.0257	BAX,CASP3,PTBP1,RELA
SSTR2		G-protein coupled receptor		1.98		0.0257	MMP9,PYGL,THBS1,VIM
bisindolylmaleimide iv		chemical - kinase inhibitor		-1	bias	0.0257	GFPT1,ITGA2,ITGAM,PCK1
heme		chemical - endogenous mammalian		1.117		0.0257	FECH,ICAM1,LCN2,MRC1
ELANE	2.553	peptidase		-0.108		0.0258	AZU1,ELANE,MMP9,SERPINA1,SIRT1
nafenopin		chemical drug				0.0258	APOA4,CYP4A11,HSD11B1,HSP90AB1,TAP2
rottlerin		chemical toxicant	Inhibited	-2.77	bias	0.0261	BAX,COL3A1,DNMT1,ICAM1,MMP9,PCNA,PRKCD,TJP1
CEBPA		transcription regulator		-0.706		0.0268	ACSL1,ADH1B,ADH1C,ADH6,AKR1B10,APOA4,ARG1,ASS1,BHMT,CDC37,CPB2,CPS1,ELANE,HMGA1,HSD11B1,ICAM1,IRF6,ITGAL,ITGAM,LCN2,LTF,MNDA,PCK1,PCNA,PLIN2,RAB31,THBS1,TUBB2A,UBE2I,VCAN
IL13		cytokine		0.918		0.027	ACSL1,ARG1,BAX,BLVRA,CAPN2,CASP3,COL18A1,COL3A1,COL6A2,CTSH,CTSS,G6PD,GSN,HSD11B1,ICAM1,LTBP1,MMP9,MRC1,NID1,PFKP,PLIN2,POSTN,SEPT11,SERPINA1,THBS1,TIMP1,TNS1
PELP1		other				0.0271	AHNAK2,COL12A1,CPNE1,CTSH,GCA,KYNU,MLPH,MMP9,MRC1,NDRG1,SRC
tetrachlorodibenzodioxin		chemical toxicant		0.041		0.0277	ACTL6A,BAX,BCAT1,CAP2,COL18A1,COL6A1,CYP4A11,DNMT1,DSC2,EPS15L1,GHITM,GRHPR,HDAC6,HSPA2,ITGAL,KHDRBS1,MANF,MBL2,NQO1,PCK1,PCNA,RELA,SERPINH1,SFN,SRC,TNC
Rp-8-pCPT-cGMPS-triethylamine		chemical reagent				0.0278	S100A10,SOD3
F Actin		complex				0.0278	CTSS,FLNA
P110		group				0.0278	COL4A1,PRKCD
VIPAS39		other				0.0278	THBS1,VWF
RASSF3		other				0.0278	BAX,CASP3
CACNA1C		ion channel				0.0278	ANXA2,S100A10
ZMYND10		other				0.0278	MMP9,THBS1
peptide T		biologic drug				0.0278	ICAM1,ITGAV
CASP6		peptidase				0.0278	ARG1,MMP9
nomilin		chemical - endogenous non-mammalian				0.0278	BAX,CASP3
TFPI		other				0.0278	CASP3,ITGA2
CSE1L		transporter				0.0278	CASP3,TP53I3
CNGB3		ion channel				0.0278	CAPN2,EIF2A
CXCL5		cytokine				0.0278	ITGAL,ITGAM
mir-128		microRNA				0.0278	BAG2,BAX
miR-320b (and other miRNAs w/seed AAAGCUG)		mature microRNA				0.0278	HSPB6,VIM
MSLN		other				0.0278	BAX,MMP9
EFEMP1	2.733	enzyme				0.0278	FBLN5,VIM
ITPR2		ion channel				0.0278	PCK1,TPR
CCL15		cytokine				0.0278	EPX,ICAM1
CFH		other				0.0278	APOA1,CRP
CMA1		peptidase				0.0278	COL3A1,MMP9
carboxymethylflavin		chemical - endogenous mammalian				0.0278	MMP9,TIMP1
formylmethylflavin		chemical - endogenous non-mammalian				0.0278	MMP9,TIMP1
Hrg		other				0.0278	ARG1,MMP9
MIA-459		chemical reagent				0.0278	BAX,RELA
MIA-313		chemical reagent				0.0278	BAX,RELA
gelam honey		chemical reagent				0.0278	NFKB1,RELA
pyridoxamine		chemical - endogenous mammalian				0.0278	CRP,PCNA
chlorambucil		chemical drug				0.0278	BAX,DEK
eprosartan		chemical drug				0.0278	COL3A1,FN1
(S)-mevalonic acid		chemical - endogenous mammalian				0.0278	CAT,CD59
lumichrome		chemical - endogenous non-mammalian				0.0278	MMP9,TIMP1
alpha-hydroxyglutarate		chemical - endogenous mammalian				0.0278	FN1,VIM
CV 3988		chemical reagent				0.0278	ICAM1,ITGAV
fenretinide		chemical drug		0.239		0.0279	AIMP1,CASP3,GOSR2,GRB2,IGFBP7,MKI67,MMP9,RELA
Ifnar		group	Activated	2.333	bias	0.0282	B2M,CD74,EIF2AK2,GBP2,IFITM3,MMP9,TAP1,TAP2,TAPBP
mir-210		microRNA	Inhibited	-2.028	bias	0.0282	ARG1,COL4A2,FAM3C,H2AFY,IL16,ISCU,NDRG1,NUP210,PTPN1
FOXO4		transcription regulator		-0.665		0.0282	COL4A1,COL4A2,FABP5,FLNB,FMOD,IGFBP7,ITGAM,MMP9,PRKCD
IGFBP2		other	Activated	2.213	bias	0.0283	CASP3,EFEMP1,FN1,NUP210,POSTN,THBS2
TIMP3		other		-1.633	bias	0.0283	LTBP1,MAPK3,MMP9,NFKB1,THBS1,VIM
beta-naphthoflavone		chemical toxicant		0.371		0.0283	APOE,BAX,CRP,CYP4A11,LBP,NQO1
TWIST2		transcription regulator		1.506		0.0286	FBLN5,FN1,MMP9,POSTN,VIM
cilostazol		chemical drug	Inhibited	-2.216		0.0286	BAX,ICAM1,MMP9,RELA,SIRT1
BMI1		transcription regulator				0.0287	CD63,DNMT1,NFKB1,NID1,SFN,TP53I3,VIM
nystatin		chemical drug				0.0288	ICAM1,LCN2,TIMP1
PPARα-RXRα		complex				0.0288	ACAA1,APOA1,GOT2
CLCN5		ion channel				0.0288	B2M,MKI67,PCNA
ZNF148		transcription regulator				0.0288	FN1,ITGAM,VIM
EHHADH	-1.01	enzyme				0.0288	ACAA1,ACSL1,CYP4A11
CRTC1		transcription regulator				0.0288	IDH3A,NQO1,TIMP1
PARK7		enzyme				0.0288	BAX,ICAM1,VIM
lith-O-Asp		chemical reagent				0.0288	CFL1,HNRNPA2B1,MMP9
mir-148		microRNA		-1.993	bias	0.0293	DNMT1,IKZF1,PKM,RELA
CD9		other				0.0293	CASP3,ITGA2,MMP9,TJP1
arsenic		chemical toxicant		1.982		0.0293	BAX,EPHX2,LTF,NQO1
berberine		chemical drug		-0.392		0.0294	BAX,CASP3,CYP4A11,FN1,GLS,ICAM1,MMP9,PCNA,TIMP1,VIM
IRF4		transcription regulator		-0.302		0.0298	ARG1,B2M,CLTA,CTSS,GALNT2,GRB2,ITGAL,MANF,MAPRE1,PCNA,RHOB,SUB1,YBX1
RUNX3		transcription regulator		-1.593	bias	0.03	BAX,COL12A1,COL4A1,FLNA,ITGAL,ITGAM,MMP9,THY1,TPM2,VIM,VWF
CAV1		transmembrane receptor		-1.133		0.0301	ARG1,FGB,ICAM1,NEDD4L,NPM1,NQO1,PCNA,RBM39,SLC12A2,SRP54,THBS1,TJP1
aldosterone		chemical - endogenous mammalian		1.125	bias	0.0301	COL3A1,FKBP5,FN1,ICAM1,IL16,LCN2,NDRG2,PTPN1,SIRT1,SLC12A2,TBC1D4,YWHAB
GLI1		transcription regulator	Activated	2.577	bias	0.0301	ARPC5,C11orf96,DRG2,GALNT2,GMFG,HNRNPU,IGFBP7,LMNA,MMP9,NDRG2,PLOD1,RHOB,SDHA,SYNE1,TNC,VIM
FSHR		G-protein coupled receptor	Activated	2.19	bias	0.0308	ESPN,FABP5,PCK1,PPP1CB,PSMD10,TJP1
thapsigargin		chemical toxicant		-0.028	bias	0.0311	ACADM,BAX,CAPN5,CSK,DNAJC10,EIF2A,FN1,ICAM1,MMP9,NEDD4L,PCK2,PCNA,SFN,SRI,THBS1
arsenite		chemical toxicant				0.0311	ASPN,COL8A1,DHRS1,HSPB1,NQO1,PRKDC,PTGES2,SQSTM1,THBS1,TRA2B
HMOX1		enzyme		-1.769		0.0316	CASP3,G6PD,GPT,ICAM1,ITGAM,MAPK14,MMP9,NQO1,PCNA,THBS1,THBS2
PNPLA2		enzyme	Inhibited	-2.185		0.0316	ACAA2,ACADM,ACSL1,ICAM1,PCK1
TNFSF13		cytokine				0.0316	BAX,MCM2,MCM5,PCNA,RPA3
paricalcitol		chemical drug	Inhibited	-2.219	bias	0.0316	COL3A1,FN1,ICAM1,PCNA,TIMP1
propofol		chemical drug		-1.715	bias	0.0316	BAX,CASP3,HMGB1,MMP9,THBS1
GAST		other	Activated	2.778	bias	0.0318	HMGB2,MAPK1,MMP9,NARS,RELA,SRC,SRSF2,TNC
FSH		complex		1.001		0.0326	ACTR2,BCKDK,CAP2,COL18A1,FKBP5,HSD11B1,KIF5B,MAP2K3,MAPK14,MMP9,PCK1,PCNA,PDLIM3,PKM,PLIN3,PPP1CB,PSIP1,PTPN1,RAB1A,RAB27A,RAB31,RANGAP1,RHOB,STK24,THBS1,TIMP1,TPM2
TRIM37		enzyme	Inhibited	-2	bias	0.0331	CD63,CKB,DNMT1,SFN
PROCR		other		0.152		0.0331	GBP2,ICAM1,MMP9,TJP1
ATG5		other		0.152		0.0331	CASP3,RELA,RTN4,SQSTM1
NPR1		enzyme				0.0331	COL3A1,FN1,GBA,MMP9
CX3CL1		cytokine		1.176	bias	0.0331	ICAM1,MFGE8,MMP9,TIMP1
TRIB3		kinase		0		0.0331	CTH,GARS,PCK2,PSPH
SLC9A3		ion channel				0.0331	B2M,CD74,ELANE,TAP2
isoflurane		chemical drug				0.0331	BAX,CASP3,ICAM1,NCSTN
WR 1065		chemical drug		1	bias	0.0331	BAX,CAT,NEDD8,TOP2B
diallyl disulfide		chemical - endogenous non-mammalian				0.0331	CASP3,CDC25C,NQO1,PCNA
ceramide		chemical - endogenous mammalian		1.154		0.0331	BAX,CASP3,ICAM1,NAT8
CEBPE		transcription regulator		0.435		0.0334	ELANE,EPX,ITGAM,LCN2,LTF,MMP9
SFRP1		transmembrane receptor		-1.131		0.0334	BAX,CASP3,FN1,MMP9,PCK1,VIM
CD5		transmembrane receptor		-0.97	bias	0.0334	ICAM1,MAP2K3,MVK,PCK2,SIPA1,SNRPD3
DCN		other		-1.276		0.0334	BAX,CASP3,ICAM1,ITGAV,MMP9,THBS1
chromium		chemical drug		-0.816	bias	0.0334	CYB5A,G6PD,NQO1,PPCS,PPIF,SOD3
SB203580		chemical - kinase inhibitor	Inhibited	-2.625	bias	0.0336	ARG1,BAX,CD2AP,COL3A1,CRP,CTSH,DUOX2,EFEMP1,EIF2AK2,FN1,GBP2,HMGB1,ICAM1,ITGAM,MAPK14,MMP9,MX1,NFKB1,NQO1,OPTN,PALLD,PCK1,POSTN,RBM3,RELA,S100A10,SOD3,THBS1,TIMP1,VIM
N-nitro-L-arginine methyl ester		chemical drug		1.389		0.0337	ACADM,BAX,CASP3,COL3A1,FN1,ICAM1,ITGAV,MMP9,TIMP1
MTPN		transcription regulator	Activated	2.804	bias	0.0339	BAX,CASP3,COL8A1,FBLN1,FN1,NFKB1,RELA,S100A10
EGF		growth factor	Activated	2.786	bias	0.0341	ACSL4,APOA1,CASP3,CDC25C,COL3A1,CPB2,FN1,GFPT1,HNF4A,HNRNPK,ICAM1,ITGA2,ITGAM,LCN2,LTF,MAPK1,MAPK3,MMP9,NCL,PCNA,PFKM,PRKDC,RHOB,S100A10,S100A11,SERPINA1,THBS1,TIMP1,TJP1,TNC,VASP,VCAN,VIM
prostaglandin A2		chemical - endogenous non-mammalian				0.0343	ICAM1,PCNA,PTGES2
NFkB (family)		group				0.0343	HNF4A,MMP9,RELA
RAPGEF1		other				0.0343	EFTUD2,SNRNP200,SRSF2
miR-223-3p (miRNAs w/seed GUCAGUU)		mature microRNA				0.0343	RHOB,STMN1,VIM
FCGR1A		transmembrane receptor				0.0343	C5,ITGAM,LSP1
DIRAS3		enzyme				0.0343	F2,HMGA1,PARP1
10-nitrooleate		chemical - endogenous mammalian				0.0343	ICAM1,MFGE8,RELA
EFNB2		kinase				0.0343	MAPK1,MAPK3,SRC
RHOB	1.51	enzyme				0.0343	ICAM1,NFKB1,RHOB
morin		chemical - endogenous non-mammalian				0.0343	COL18A1,MMP9,TIMP1
IL1RN		cytokine		-1.571	bias	0.0348	CTSS,GSDMD,HSD11B1,ICAM1,MMP9,MX1,OAS3,PML,RELA,TIMP1,TRIM22
TSLP		cytokine				0.0348	CD63,ICAM1,MKI67,MX1,TIMP1
Cdc42		enzyme	Activated	2.236		0.0348	CTSH,CTSS,FLNA,MYH9,STMN1
F3		transmembrane receptor		1.766	bias	0.0356	ARG1,EFEMP1,F2,ICAM1,ITGA2,ITGAM,MMP9
PLAU		peptidase		1.501		0.0356	ARG1,FN1,ICAM1,ITGAV,MMP9,OAS3,VIM
C3		peptidase		1.744	bias	0.0356	C5,CASP3,CRP,FN1,GPT,ITGAM,LCN2
silibinin		chemical drug		-0.471	bias	0.0356	BAX,CASP3,CDC25C,FN1,MMP9,PCNA,VIM
3,3'-diindolylmethane		chemical drug		-0.128		0.0356	BAX,DNMT1,NQO1,RELA,TAP1,TAP2,VIM
Ifn gamma		complex		1.869	bias	0.0356	ADAR,CASP3,EIF2AK2,FN1,ICAM1,MAPK1,MMP9,PCK1,PML
SAFB	3.986	other		0	bias	0.0362	B2M,BCCIP,CD74,EIF4B,PPP1R12A,RBM8A
docetaxel		chemical drug		0.227		0.0365	BAX,CDC25C,EPS8,ERBIN,ITGA2,ITGAV,MAPK3,MMP9,PCNA,THBS1,TUBB4B
collagen type i (family)		group		0	bias	0.0373	CFL2,HNF4A,LGALS4,MYO7B
PLIN5		other	Activated	2		0.0373	ACAA2,ACADM,ACSM5,NQO1
RASSF5		other		1		0.0373	CIRBP,DTYMK,LRRFIP1,U2AF1/U2AF1L5
REN		peptidase		0.926		0.0373	ADD3,COL3A1,ICAM1,RELA
SFN	3.062	other		0.849	bias	0.0373	DSC2,FKBP5,TJP1,VIM
TNFSF11		cytokine	Activated	3.727	bias	0.0376	BST1,CAPN2,CKB,CSRP1,CUL4A,EHD1,HCLS1,ICAM1,ILF3,ITGAL,ITGAM,ITGAV,MMP9,NFKB1,RACGAP1,RHOB,RRAS,SRC,STMN1
Pdgf (complex)		complex		1.071	bias	0.0377	BAX,COL4A1,F10,FN1,ICAM1,MCM7,PCNA,PTPN1,TIMP1
triamcinolone hexacetonide		chemical drug				0.0377	HMGB1,ICAM1
ST6GALNAC1		enzyme				0.0377	B2M,VIM
ZNF746		transcription regulator				0.0377	PCK1,SDHA
PCM1		other				0.0377	MKI67,PCNA
Collagen type III		complex				0.0377	ITGA2,ITGAV
SERPINC1		enzyme				0.0377	HSPG2,MAPK3
NUP107	1.304	other				0.0377	NUP133,TPR
FALEC		other				0.0377	ECM1,TP53I3
DEAF1		transcription regulator				0.0377	CASP3,HNRNPA2B1
NACC1		transcription regulator				0.0377	BAX,HMGB1
ISG15		other				0.0377	IFITM3,MX1
KLKB1		peptidase				0.0377	ICAM1,SIRT1
GNMT		enzyme				0.0377	GPT,NPC1
sapanisertib		chemical drug				0.0377	HNRNPC,SRSF1
nicorandil		chemical drug				0.0377	BAX,CASP3
anethole		chemical - endogenous non-mammalian				0.0377	MMP9,TIMP1
rutin		chemical toxicant				0.0377	CASP3,CAT
sanguinarine		chemical - endogenous non-mammalian				0.0377	NQO1,TIMP1
S-allyl-L-cysteine		chemical - endogenous non-mammalian				0.0377	BAX,CASP3
sivelestat		chemical drug				0.0377	ELANE,HMGB1
romidepsin		biologic drug		1.467		0.0381	BAX,GSN,ICAM1,ITGAV,MMP9,RHOB,RHOC
PRKAA		group		-0.725		0.0382	BAX,HSD11B1,PCK1,VIM,YBX1
T3-TR-RXR		complex		1.432	bias	0.0382	COL6A3,F10,FGA,PCK1,PFKP
IRS1		enzyme				0.0383	COL3A1,COL4A1,COL4A2,COL6A1,COL6A3,DBNL,FEN1,LAMA4,PCK1,RELA,TGFBI
CFTR		ion channel	Inhibited	-2.804		0.0384	ACAA1,ACAA2,CAPG,CYP4A11,EPHX2,GPX2,NFKB1,SLC27A2
CD28		transmembrane receptor	Activated	2.807	bias	0.0386	AHCYL1,ANAPC1,C2,CASP3,CENPF,GBP2,H2AFY,HGS,HNRNPA1,IGLL1/IGLL5,ILF2,ITGAL,LSP1,LTBP1,MRPL11,NCL,NFKB1,POLR2A,PPA1,PRMT5,RELA,RHOC,THBS1,VBP1
KLF4		transcription regulator		0.823	bias	0.0388	ARG1,BAX,CASP3,COL8A1,EFEMP1,FN1,HSPB1,IFITM3,IRF6,ITGAM,MRC1,NCKAP1,PFKP,SERPINA1,SERPINH1,SOD3,THBS1,TNC,VIM
MOG		other				0.0391	ARG1,C5,ICAM1,ITGAL,MKI67,MMP9
TNFSF10		cytokine		0.493		0.0398	BAX,CASP3,EIF2AK2,ITGAM,MMP9,PCNA,RELA,SERPINH1,TIMP1
Fcgr3		group				0.0403	BAX,ITGAL,ITGAM
triclosan		chemical drug				0.0403	MECP2,NQO1,TIMP1
shikonin		chemical drug				0.0403	BAX,CAT,TIMP1
ABCC8		transporter				0.0403	ACADM,CAT,GPX2
Mir200		group				0.0403	CFL2,CRTAP,SERPINH1
SDCBP	4.417	enzyme				0.0403	SRC,TJP1,VIM
TARBP2		other				0.0403	DICER1,MYL9,THBS1
nimesulide		chemical drug				0.0403	CAT,MMP9,PCNA
latrunculin B		chemical reagent				0.0403	CNN1,DES,PFN1
Jnk		group	Activated	2.443	bias	0.0404	ANXA5,BAX,CASP3,COL3A1,CRIP2,DNMT1,FN1,HNF4A,ICAM1,MMP9,MRC1,MRC2,NQO1,POSTN,TIMP1,VCAN
ALKBH5		enzyme				0.0407	CTTN,DNMT1,EIF4G2,MAPK14,MYO6,NONO,RACGAP1,RPA1
clopidogrel		chemical drug		-1.89		0.0407	AGRN,COL5A1,CRP,CTH,GARS,LAMA5,PCK2
L-arginine		chemical - endogenous mammalian				0.0418	ASS1,FN1,PCNA,RELA
chrysotile asbestos		chemical toxicant				0.0418	CTSS,DNAJC3,JCHAIN,TIMP1
letrozole		chemical drug		1		0.0418	AGR2,BAX,GRB2,MKI67
deoxynivalenol		chemical toxicant		0.152	bias	0.0418	DNAJC3,ICAM1,PCNA,TJP1
dichlorovinylcysteine		chemical toxicant		0.985		0.0418	ACADS,GRB2,PKM,SLC27A2
SUMO2		enzyme		-0.447		0.0418	CD59,CTH,HMGA1,TNC,XRCC5
CSF1R		kinase		0.277	bias	0.0418	ARG1,FMOD,MMP9,MRC1,PCNA
fasudil		chemical drug		-1.96		0.0418	ARG1,CASP3,ICAM1,MMP9,MRC1
MYB		transcription regulator	Activated	2.354		0.0419	BAX,CLTA,CNN3,COL4A1,ELANE,ERBIN,FN1,ICAM1,IGLL1/IGLL5,LCN2,PCNA,SLC27A2,VIM
CSF2		cytokine		0.976	bias	0.042	ADGRE5,ANLN,ARG1,BAX,CASP3,CD63,CD74,COL8A1,HMGB1,ICAM1,IFITM3,IL16,ILF3,ITGAM,KIF11,MCM5,MKI67,MMP9,MRC1,NFKB1,PPIF,PTK2B,RACGAP1,RBBP4,RBM3,RELA,SLC30A7,SQSTM1,STEAP3,STMN1,THBS1
ESRRA		ligand-dependent nuclear receptor		0.492	bias	0.0422	ACADM,ACSL1,CKB,CYB5A,DEK,ETFDH,IDH3A,LTF,NDUFB5,PCK2,PKM,PRKCD,SIRT1,TRA2B
NFYB		transcription regulator				0.0426	CDC25C,CENPF,FAM49B,FBXL18,GALNT2,HMGB2,HNRNPA1,L2HGDH,MSRA,MVK,PCK1,PCNA,RHOB,SEPT7,SON,TAX1BP3,TJP1,VIM,VWF
MAFB		transcription regulator		-0.128	bias	0.0432	AKR1B10,CD2AP,CNN2,FBLN5,FCGBP,MARCKS,MMP9,PCK1
15-deoxy-delta-12,14 -PGJ 2		chemical - endogenous mammalian		-0.187		0.0438	BAX,CASP3,CDC25C,FN1,GSN,HSPB1,ICAM1,ITGAM,MAPK14,MMP9,NFKB1,NQO1,PARP1,PTGES2
EBF1		transcription regulator		1.725	bias	0.044	ACACB,IGKC,IGLL1/IGLL5,MAPK1,PCK2,PFKP,POSTN,PPP1CA,PPP1CB,PTPN1,RPS6KB1
HNF1B		transcription regulator		1.488		0.0444	ANXA4,COL5A1,EPS8,F11R,FGB,FN1,HNF4A,NID2,SERPINA1,SERPINH1
SERPINF1		other		-1		0.0454	BAX,CSPG4,NFKB1,THBS1,TJP1,VIM
ZAP70		kinase	Activated	2.449	bias	0.0454	FKBP5,MYCBP2,NASP,RBM3,SRP14,TRA2A
ionomycin		chemical reagent		1.516	bias	0.0455	AHNAK,CASP3,DNAJC3,DNMT1,EIF2AK2,ENPP1,ICAM1,IKZF1,ITGAL,MMP9,NCL,PTPN1,RELA,SIRT1
HES3		transcription regulator		0.447		0.0456	IFI30,MFGE8,PC,PSPC1,RBM3
ABCB6		transporter		-0.485		0.0456	CAT,CYP4A11,CYP4F2,FECH,TXNRD2
miR-200b-3p (and other miRNAs w/seed AAUACUG)		mature microRNA	Inhibited	-2.204	bias	0.0456	BST1,ERBIN,MARCKS,PPM1F,VIM
mir-30		microRNA	Inhibited	-2.204	bias	0.0456	BAX,ITGA2,NEDD4L,UBE2I,VIM
ouabain		chemical drug				0.0456	ANXA5,MAPK1,PCNA,VIM,YWHAQ
trilinolein		chemical - endogenous mammalian				0.0458	BAX
15-deoxy-delta-12-14 prostaglandin D2		chemical - endogenous mammalian				0.0458	ITGAM
17-phenyl-18,19,20-trinor-prostaglandin d2		chemical reagent				0.0458	ITGAM
leukotriene A4		chemical - endogenous mammalian				0.0458	TNC
aucubin		chemical - endogenous non-mammalian				0.0458	BAX
endocannabinoid		chemical - endogenous mammalian				0.0458	APOA1
cortodoxone		chemical - endogenous mammalian				0.0458	FN1
beta-lactose		chemical - endogenous mammalian				0.0458	MMP9
ERMN		other				0.0458	CNP
clofazimine		chemical drug				0.0458	PLIN2
etalocib		chemical drug				0.0458	ITGAM
BDNF-AS		other				0.0458	CASP3
Rap		group				0.0458	MVP
thymidine phosphorylase		group				0.0458	MARCKS
Hdac1/2		group				0.0458	MKI67
G-protein gamma		group				0.0458	SRC
G-protein beta		group				0.0458	SRC
PYDC2		other				0.0458	RELA
Aspp		group				0.0458	BAX
RCC1		other				0.0458	RAN
ASB9		transcription regulator				0.0458	CKB
PAFAH2	-1.387	enzyme				0.0458	GPT
PMM2		enzyme				0.0458	ICAM1
ZBTB2		transcription regulator				0.0458	RELA
ABCA12		transporter				0.0458	GBA
isofagomine		chemical drug				0.0458	GBA
AEOL 10113		chemical drug				0.0458	BAX
NLRP2		other				0.0458	ICAM1
LMTK3		kinase				0.0458	HSPB8
DNAJA4		other				0.0458	APOE
REEP5		transporter				0.0458	TOP2B
FENDRR		other				0.0458	FN1
WFDC1		other				0.0458	ICAM1
AKIP1		other				0.0458	BAX
SLC26A1		transporter				0.0458	GPT
RND2		enzyme				0.0458	RHOB
Lamin b		group				0.0458	LMNA
UBR2		enzyme				0.0458	PSMD9
SGMS2		enzyme				0.0458	APOA1
CLDN9		other				0.0458	TJP1
MYADM		other				0.0458	ICAM1
ADH5		enzyme				0.0458	SDHA
MPC1		other				0.0458	MPC2
CHST11		enzyme				0.0458	MMP9
MIIP		other				0.0458	HDAC6
KIF26B		other				0.0458	NQO1
KCTD10		ion channel				0.0458	RHOB
ELSPBP1		other				0.0458	ADSS
ZNF667		transcription regulator				0.0458	BAX
CTU1		other				0.0458	DEK
PHF10		other				0.0458	CASP3
MIGA2		other				0.0458	H2AFY
Gm13570/Gm4984		other				0.0458	MPC2
DPP3	1.378	peptidase				0.0458	NQO1
PFDN1	3.534	transcription regulator				0.0458	PFDN5
LRRC4		other				0.0458	STMN1
HNF1α dimer		complex				0.0458	HNF4A
Cdc2		group				0.0458	CDC25C
FILIP1		other				0.0458	FLNA
gataparsen		biologic drug				0.0458	CASP3
veliparib		chemical drug				0.0458	PARP1
alpha-hederin		chemical reagent				0.0458	MMP9
VTRNA2-1		other				0.0458	BAX
thymidine kinase		group				0.0458	PRKDC
sotrastaurin		chemical drug				0.0458	PCNA
AZD1981		chemical drug				0.0458	ITGAM
Rho gdi		group				0.0458	RHOB
KPNA4		transporter				0.0458	RELA
NDUFV1		enzyme				0.0458	PTPN1
NFE2L3		transcription regulator				0.0458	NQO1
EHD4	1.978	enzyme				0.0458	EHD1
LSM10		other				0.0458	HIST1H1C
PPP1R9B		enzyme				0.0458	PPP1CA
PSMB4		peptidase				0.0458	IGLL1/IGLL5
NOL3		other				0.0458	CAD
NUB1		other				0.0458	NEDD8
RGL1		other				0.0458	PPP1CA
SLC52A1		transporter				0.0458	ICAM1
Rcan1		other				0.0458	FLNA
PSMB7		peptidase				0.0458	IGLL1/IGLL5
RGS5		other				0.0458	BAX
C2	2.68	peptidase				0.0458	C5
miR-450a-5p (and other miRNAs w/seed UUUGCGA)		mature microRNA				0.0458	HNRNPK
mir-216		microRNA				0.0458	YBX1
PSMD8		other				0.0458	IGLL1/IGLL5
GSTM5		enzyme				0.0458	MAPK14
PFDN4		other				0.0458	PFDN5
epidermal growth factor		chemical drug				0.0458	PTPN1
EIF2B3		other				0.0458	EIF2B5
ACOT8		enzyme				0.0458	CAT
ATP5F1A		transporter				0.0458	H2AFY
TUBB3		other				0.0458	ANXA5
PDE1A		enzyme				0.0458	DNMT1
isonicotinamide		chemical reagent				0.0458	PCK1
ORC4		other				0.0458	LMNB2
PPP1R3A		phosphatase				0.0458	THBS1
SEC23B		transporter				0.0458	BAX
WNK3		kinase				0.0458	SLC12A2
ASGR1		transmembrane receptor				0.0458	MMP9
MAP1LC3B		other				0.0458	RELA
ORC3		other				0.0458	LMNB2
VPS4B		transporter				0.0458	CASP3
M6PR		transporter				0.0458	NPC1
dulanermin		biologic drug				0.0458	BAX
Scgb1b27 (includes others)		other				0.0458	F2
ALYREF	2.011	transcription regulator				0.0458	APOE
GBP2	2.85	enzyme				0.0458	MMP9
RANBP2		enzyme				0.0458	FN1
THSD4		other				0.0458	MMP9
HIST2H2BE		other				0.0458	RAN
PRR13		other				0.0458	THBS1
IGHMBP2		enzyme				0.0458	APOA1
clomoxir		chemical reagent				0.0458	ACADM
tyrosine kinase inhibitor		chemical drug				0.0458	FN1
Gm17251		other				0.0458	RAB11B
metabolite		chemical - endogenous mammalian				0.0458	NQO1
RO0281675		chemical reagent				0.0458	BAX
BMS-275183		chemical drug				0.0458	THBS1
mitoguazone		chemical drug				0.0458	ITGAL
dimethyl sulfate		chemical toxicant				0.0458	DNMT1
SC-19220		chemical reagent				0.0458	ICAM1
D-lactic acid		chemical - endogenous mammalian				0.0458	ITGAM
vanoxerine		chemical drug				0.0458	SOD3
nefazodone		chemical drug				0.0458	GPT
fluorescein		chemical drug				0.0458	CASP3
3,4-dihydro-5-[4-(1-piperidinyl)butoxy]-1(2H)-isoquinolinone		chemical reagent				0.0458	PARP1
2-nitrophenyl EGTA		chemical reagent				0.0458	AHNAK
E 3330		chemical drug				0.0458	RELA
4-cresol		chemical toxicant				0.0458	ITGAM
pentachlorophenol		chemical toxicant				0.0458	NQO1
bis-T-23		chemical reagent				0.0458	COL4A1
cevimeline		chemical drug				0.0458	HNRNPA2B1
procaterol		chemical drug				0.0458	ICAM1
morphiceptin		chemical reagent				0.0458	MMP9
2-ethylhexanol		chemical reagent				0.0458	CYP4A11
15-(S)-hydroperoxyeicosatetraenoic acid		chemical - endogenous mammalian				0.0458	F2
2'-fucosyllactose		chemical - endogenous mammalian				0.0458	ICAM1
oxfenicine		chemical - endogenous non-mammalian				0.0458	ACADM
agar		chemical - endogenous non-mammalian				0.0458	RBM3
hydrocortisone phosphate		chemical drug				0.0458	APOE
VHL		transcription regulator		-0.865		0.046	AHCYL1,CFL1,CNN1,DUOX2,FN1,HNRNPA2B1,IFITM3,LMNA,PCNA,PPIL1,VIM
linoleic acid		chemical - endogenous mammalian		0.565		0.0463	ACADM,ACSL4,APOA1,CYP4F2,ICAM1,NEDD4L,PLIN2
ATM		kinase		1.491	bias	0.0463	BAX,CDC25C,FN1,HSP90AB1,PCNA,PPP2R5D,XRCC5
PIN1		enzyme		1.941		0.0463	BAX,COL3A1,FN1,MMP9,PML,TIMP1,TP53I3
KLF6		transcription regulator		0.88		0.0463	ARG1,HNF4A,MKI67,MMP9,MRC1,PCNA,SERPINH1
Focal adhesion kinase		group				0.0465	ICAM1,LPP,MMP9,PALLD
AGTR2		G-protein coupled receptor		1.982	bias	0.0465	BAX,COL3A1,DES,RPS6KB1
ferulic acid		chemical - endogenous non-mammalian		0		0.0465	CASP3,CAT,MKI67,TIMP1
glycine		chemical - endogenous mammalian				0.0467	ITGAM,PCK2,PCNA
KLK4		peptidase				0.0467	CUL4A,MKI67,PCNA
PADI2		enzyme				0.0467	MKI67,RELA,VIM
DEF6		other				0.0467	FN1,MMP9,VIM
HOTAIRM1		other				0.0467	EPHX2,MVP,TES
ITGA6		transmembrane receptor				0.0467	BAX,ITGA2,RELA
ATR		kinase				0.0467	BAX,PCNA,RBM39
PDK4		kinase				0.0467	ARG1,PC,PKM
retinol		chemical drug				0.0467	IL16,PCK1,PLIN2
androgen		chemical drug		-0.513		0.0472	AES,AGR2,CDC25C,COL12A1,COL4A2,CRP,CTNNBL1,FLNA,GSN,ITGAM,MMP9,PTPN1,YBX1
IRF5		transcription regulator		1.588	bias	0.0484	BAX,CASP3,COL3A1,COL4A1,IFITM3,NFKB1,RELA,TMPO
FBXW7		enzyme		-1.342	bias	0.0488	ECHS1,HMGB1,HSPB1,ME2,NQO1,RHOB
cadmium chloride		chemical toxicant		1.982	bias	0.0488	ANXA5,CRP,HSPB1,MCM7,PCNA,VIM
ganglioside GM3		chemical - endogenous mammalian				0.0488	CSK,ICAM1
L-type Calcium Channel		complex				0.0488	APOE,ENPP1
carfilzomib		biologic drug				0.0488	EIF2A,HTRA2
TRPC4AP		transporter				0.0488	NOP56,NPM1
S100A10	1.977	other				0.0488	ANXA2,S100A10
hydrogel		chemical drug				0.0488	TJP1,VIM
HDAC10		transcription regulator				0.0488	MMP9,SQSTM1
MAP3K12		kinase				0.0488	CASP3,CRP
GRK5		kinase				0.0488	NFKB1,RELA
CD82		other				0.0488	TIMP1,U2AF2
PKP2		other				0.0488	COL3A1,FN1
miR-138-5p (miRNAs w/seed GCUGGUG)		mature microRNA				0.0488	RHOC,VCAN
OCLN		other				0.0488	MMP9,SIRT1
RASSF10		other				0.0488	CASP3,PCNA
TAPBP	1.46	transporter				0.0488	TAP1,TAP2
AQP7		transporter				0.0488	BAX,CASP3
GABP		complex				0.0488	ELANE,SOD3
Nr1h		group		-0.375		0.0488	ACACB,APOC2,APOE,C2,FECH,HIP1,ITGAL,NPC1,PML,TAP1,THBS1,THY1
ADIPOQ		other		-1.213		0.0491	ACACB,ACSL1,ACSL5,ACSM5,ARG1,COL3A1,FN1,ICAM1,PCK1,PCNA,PTK2B,SLC27A2,TIMP1
ATG7		enzyme		-1.254		0.0493	ACACB,ACSL1,ARG1,CASP3,NQO1,PLIN3,SQSTM1
Immunoglobulin		complex		-0.623		0.0495	ACSL1,CAPG,CD74,CTH,EIF2A,EIF2AK2,ENO3,FBP1,FLNB,FN1,G6PD,ICAM1,IDH3A,IFI30,JCHAIN,LCN2,MKI67,MMP9,MTHFD1,PC,PCK1,PCK2,PDK3,PGM1,PHKG2,POSTN,PPA1,PRMT5,PYGM,RAB31,RELA,TIMP1,VCAN
HBEGF		growth factor	Activated	2.236	bias	0.0496	ALDOA,MAPK1,MAPK14,MMP9,PKM
ILK		kinase				0.0496	FN1,HNRNPA1,MAPK1,MAPK3,MMP9
NME1		kinase				0.0496	BAX,HNRNPA2B1,NOP58,SF3A1,TIMP1
U73122		chemical reagent		-0.73	bias	0.0496	CDC25C,FN1,ICAM1,ITGAM,PCNA
garcinol		chemical - endogenous non-mammalian	Inhibited	-2.121		0.0511	ANAPC1,BAX,GTF2I,HNRNPUL1,MNDA,NFKB1,PML,TXNDC9
AMPK		complex		-1.854		0.0512	BAX,CAT,CYP4F2,IDH3A,MMP9,PCK1,SDHA,SIRT1,VIM,YBX1
Ins1		other	Activated	2.14		0.0525	ACADM,ADH1C,APOA1,BCKDHA,BDH1,CNN1,COL18A1,CYB5A,EHHADH,G6PD,HNRNPK,MAPK1,MAPK3,PCK1,PCNA,PLIN2,RPS6KB1,SIRT1,THY1,TIMP1,VIM
quercetin		chemical drug	Inhibited	-2.191		0.0546	ACAA2,BAX,CD63,CYP4A11,GPT,ICAM1,ITGAL,LCN2,MKI67,MMP9,SIRT1
docosahexaenoic acid		chemical drug	Inhibited	-2.252		0.055	APOE,ARG1,BAX,EIF2A,MMP9,MRC1,NFKB1,PCK1,RELA,SERPINH1,THBS1,THBS2,TIMP1
Y 27632		chemical drug	Inhibited	-2.621		0.059	COL12A1,ICAM1,MMP9,RELA,THBS1,TJP1,VIM
GW9662		chemical reagent	Activated	2		0.0599	AGR2,BAX,FN1,LCN2,MCM7,PEA15,PLIN2,RELA
SOX17		transcription regulator	Activated	2		0.0683	COL4A1,COL4A2,GPT,HNF4A
PRKAA2		kinase	Inhibited	-2.039		0.0685	ACOT7,BAX,FN1,MMP9,NDRG2,TNS1,VIM,YBX1,ZYX
TET2		enzyme		1.897		0.0694	AHNAK,ANXA2,FAM129B,FCN1,FN1,IFITM3,ITGA2,LXN,NCKAP1,TIMP1
PLA2G10		enzyme	Inhibited	-2.138		0.084	ARG1,BYSL,CPNE1,LXN,MKI67,MRC1,NUP35,SRM
KDM1A		enzyme	Activated	2.155		0.0942	CAD,CENPF,CHD4,DNMT1,HSD11B1,MCM2,MPC2,NCL,PPP1R12A,RUVBL1,SIRT1,STEAP3
EIF3E		other	Inhibited	-2		0.109	COL18A1,COL5A1,THBS1,TNC
IRF8		transcription regulator		1.801		0.109	B2M,BAX,CASP3,CD74,CTSS,ICAM1,ITGAM,LSP1,MMP9,PML
thioctic acid		chemical drug	Inhibited	-2.2		0.126	BAX,CAT,ICAM1,MMP9,NQO1
CALR		transcription regulator		1.948		0.133	COL3A1,CTTN,FN1,ICAM1
doxycycline		chemical drug		-1.941		0.135	COL3A1,JCHAIN,MAPK14,MMP9,PCK2,TIMP1
NCOA1		transcription regulator		-1.929		0.142	ACSL4,AGL,AGRN,ALDOA,APOA4,GYG1,MAPK3,PCK1,PTGES2,U2AF1/U2AF1L5
NRG1		growth factor	Activated	2.481		0.164	CASP3,COL6A3,ENO3,FABP5,FN1,HMGA1,HNRNPK,ITGAM,ITGAV,MMP9,PYGM,SDHA,SGSH,VIM
TNFRSF1B		transmembrane receptor		1.969		0.181	CASP3,ICAM1,LBP,MMP9,NFKB1,SRC,TIMP1
IL24		cytokine	Activated	2		0.186	BAX,CASP3,EIF2A,EIF2AK2
SMARCA2		transcription regulator	Activated	2		0.192	DES,FKBP5,ITGAM,PCK1,RAB27A
GHRL		growth factor	Inhibited	-2.216		0.192	BAX,EIF2A,MLYCD,PCK1,SIRT1
aspirin		chemical drug	Inhibited	-2.027		0.193	APOA1,CRP,CYB5A,ICAM1,MMP9,RELA,THBS1
TNFRSF1A		transmembrane receptor	Activated	2.059		0.199	CASP3,GPT,ICAM1,ITGAM,LBP,LCN2,MMP9,NQO1,RELA,SRC
TNFSF12		cytokine	Activated	2.013		0.206	BST1,ICAM1,ITGAM,MMP9,NDUFB5,SDHA,TIMP1
curcumin		chemical drug	Inhibited	-2.453		0.21	APOE,ATOX1,BAX,CASP3,CLIC1,CRP,DNMT1,EIF3H,ELOB,HMGB1,ICAM1,ITGAM,LSP1,MAPK3,MMP9,MTHFD1,NFKB1,NQO1,RELA,VIM
topotecan		chemical drug		-1.897		0.219	ACSL1,CYB5A,FAM3C,FUBP1,HNRNPK,ITGA2,OSBPL8,RALY,SON,SRSF3,TP53I3
GATA6		transcription regulator	Activated	2.311		0.277	ARG1,BCAM,COL4A1,COL4A2,EMD,HNF4A,IRF6,LRRFIP1,LTBP1,MRC1,MYH9
spironolactone		chemical drug	Inhibited	-2.207		0.322	CASP3,COL3A1,DES,FN1,ICAM1
methamphetamine		chemical drug		1.967		0.441	BAX,ICAM1,MMP9,NDUFB8
IL10		cytokine		-1.816		0.511	ARG1,BAX,CASP3,CTSS,FKBP5,ICAM1,ITGAL,ITGAM,MMP9,MRC1,PTPN1,SLC9A3R2,TAP1,TAP2,TIMP1,TUBB4B,VCAN
EZH2		transcription regulator		-1.809		0.511	AADAT,CD63,CELF1,COL4A1,DNMT1,FBLN1,FKBP5,ICAM1,IKZF1,LCN2,MMP9,MNDA,MYL6,NDRG1,SERPINA1,SFN,SIRT1
glucocorticoid		chemical drug	Inhibited	-2.418		1	BAX,CD74,CRIP1,FBLN1,FBLN2,FN1,G6PD,ICAM1,IL16,MMP9,PAH,PCK1
SOX2		transcription regulator		1.904		1	CNP,DNMT1,DPY30,EFEMP1,GSN,IRF6,LIMA1,LMCD1,NCKAP1,PRKCD,S100A13,SERPINA1,SLC12A2,VCAN,VIM

## Sheet: B_Molecule
Symbol	Entrez Gene Name	GenPept/UniProt/Swiss-Prot Accession	Expr Fold Change	Expr p-value	Location	Type(s)	Biomarker Application(s)	Drug(s)	Entrez Gene ID for Human	Entrez Gene ID for Mouse	Entrez Gene ID for Rat
AADAT	aminoadipate aminotransferase	Q8N5Z0	-2.162	4.48e-08	Cytoplasm	enzyme			51166	23923	29416
AASS	aminoadipate-semialdehyde synthase	Q9UDR5	-2.151	6.81e-15	Cytoplasm	enzyme			10157	30956	296925
ABAT	4-aminobutyrate aminotransferase	P80404	-1.275	5.46e-09	Cytoplasm	enzyme		theophylline/tretinoin/valproic acid,valproic acid,vigabatrin	18	268860	81632
ABCD1	ATP binding cassette subfamily D member 1	P33897	-1.437	2.74e-05	Plasma Membrane	transporter			215	11666	363516
ABCF2	ATP binding cassette subfamily F member 2	Q9UG63	1.208	2.93e-05	Cytoplasm	transporter			10061	27407
ABHD11	abhydrolase domain containing 11	Q8NFV4	2.829	1.75e-05	Cytoplasm	enzyme			83451	68758	360831
ACAA1	acetyl-CoA acyltransferase 1	P09110	-1.476	1.36e-12	Cytoplasm	enzyme	unspecified application	trimetazidine	30	113868	501072|24157
ACAA2	acetyl-CoA acyltransferase 2	P42765	-1.098	6.41e-11	Cytoplasm	enzyme	unspecified application		10449	52538	170465
ACACB	acetyl-CoA carboxylase beta	O00763	-2.565	3.77e-05	Cytoplasm	enzyme			32	100705	116719
ACAD11	acyl-CoA dehydrogenase family member 11	Q709F0	-1.713	6.07e-10	Cytoplasm	enzyme			84129	102632	315973
ACADM	acyl-CoA dehydrogenase medium chain	P11310	-1.002	5.83e-09	Cytoplasm	enzyme	unspecified application		34	11364	24158
ACADS	acyl-CoA dehydrogenase short chain	P16219	-1.487	0.000736	Cytoplasm	enzyme	unspecified application		35	11409	64304
ACADSB	acyl-CoA dehydrogenase short/branched chain	P45954	-1.48	4.7e-05	Cytoplasm	enzyme			36	66885	25618
ACOT7	acyl-CoA thioesterase 7	O00154	5.357	5.64e-11	Cytoplasm	enzyme			11332	70025	26759
ACOT9	acyl-CoA thioesterase 9	Q9Y305	1.456	3.52e-06	Cytoplasm	enzyme			23597	64833|56360	302640
ACOX2	acyl-CoA oxidase 2	Q99424	-1.625	2.73e-06	Cytoplasm	enzyme			8309	93732	252898
ACSL1	acyl-CoA synthetase long chain family member 1	P33121	-1.382	0.012	Cytoplasm	enzyme	unspecified application		2180	14081	25288
ACSL4	acyl-CoA synthetase long chain family member 4	O60488	1.888	0.00169	Cytoplasm	enzyme			2182	50790	113976
ACSL5	acyl-CoA synthetase long chain family member 5	Q9ULC5	-1.019	7.78e-06	Cytoplasm	enzyme			51703	433256	94340
ACSM3	acyl-CoA synthetase medium chain family member 3	Q53FZ2	-2.023	2.7e-14	Cytoplasm	enzyme			6296	20216	24763
ACSM5	acyl-CoA synthetase medium chain family member 5	Q6NUN0	-3.37	1.19e-07	Other	enzyme			54988	272428	361637
ACSM2A	acyl-CoA synthetase medium chain family member 2A	Q08AH3	-1.177	3.56e-06	Cytoplasm	enzyme			123876	233799	246263
ACTBL2	actin beta like 2	Q562R1	1.152	7.8e-08	Nucleus	other			345651	238880	294732
ACTL6A	actin like 6A	O96019	3.821	9.07e-06	Nucleus	other			86	56456	361925
ACTR2	actin related protein 2	P61160	1.204	6.35e-12	Plasma Membrane	other			10097	66713	289820
ADAR	adenosine deaminase RNA specific	P55265	3.649	2.45e-09	Nucleus	enzyme			103	56417	81635
ADD3	adducin 3	Q9UEY8	3.755	1.86e-07	Cytoplasm	other			120	27360	25230
ADGRE5	adhesion G protein-coupled receptor E5	P48960	2.943	1.19e-05	Plasma Membrane	G-protein coupled receptor			976	26364	361383
ADH6	alcohol dehydrogenase 6 (class V)	P28332	-1.543	0.000165	Cytoplasm	enzyme			130		310903
ADH1B	alcohol dehydrogenase 1B (class I), beta polypeptide	P00325	-1.342	5.26e-06	Cytoplasm	enzyme		fomepizole	125
ADH1C	alcohol dehydrogenase 1C (class I), gamma polypeptide	P00326	-1.347	0.000978	Cytoplasm	enzyme		fomepizole	126	11522	24172
ADRM1	adhesion regulating molecule 1	Q16186	1.313	0.00238	Plasma Membrane	other	unspecified application		11047	56436	65138
ADSS	adenylosuccinate synthase	P30520	2.8	5.5e-11	Cytoplasm	enzyme		adenylosuccinate synthetase inhibitor,alanosine	159	11566	289276
AEBP1	AE binding protein 1	Q8IUX7	3.989	4.32e-07	Nucleus	peptidase			165	11568	305494
AES	amino-terminal enhancer of split	Q08117	1.669	0.0418	Nucleus	transcription regulator			166	14797	29466
AFMID	arylformamidase	Q63HM1	-1.187	3.27e-07	Nucleus	enzyme			125061	71562	688283
AGA	aspartylglucosaminidase	P20933	2.875	0.000263	Cytoplasm	enzyme			175	11593	290923
AGL	amylo-alpha-1, 6-glucosidase, 4-alpha-glucanotransferase	P35573	-1.621	0.000296	Cytoplasm	enzyme			178	77559	362029
AGPS	alkylglycerone phosphate synthase	O00116	1.416	0.00382	Cytoplasm	enzyme			8540	228061	84114
AGR2	anterior gradient 2, protein disulphide isomerase family member	O95994	2.913	9.8e-08	Extracellular Space	other	diagnosis		10551	23795	298961
AGR3	anterior gradient 3, protein disulphide isomerase family member	Q8TD06	-1.086	2.03e-06	Extracellular Space	other	diagnosis		155465	403205	298959
AGRN	agrin	O00468	1.843	3.34e-06	Plasma Membrane	other			375790	11603	25592
AGXT2	alanine--glyoxylate aminotransferase 2	Q9BYV1	-1.325	5.75e-07	Cytoplasm	enzyme			64902	268782	83784
AHCYL1	adenosylhomocysteinase like 1	O43865	2.561	0.00498	Cytoplasm	enzyme	unspecified application		10768	229709	362013
AHNAK2	AHNAK nucleoprotein 2	Q8IVF2	1.131	3.06e-12	Cytoplasm	other			113146	100041194	314478
AHNAK	AHNAK nucleoprotein	Q09666	1.133	0.000274	Nucleus	other			79026	66395	191572
AHSA1	activator of HSP90 ATPase activity 1	O95433	1.289	0.0074	Cytoplasm	other			10598	217737	681996
AIMP1	aminoacyl tRNA synthetase complex interacting multifunctional protein 1	Q12904	1.487	1.24e-08	Extracellular Space	cytokine	diagnosis		9255	13722	114632
AKAP2	A-kinase anchoring protein 2	Q9Y2D5	2.222	0.00115	Plasma Membrane	other			11217	11641	298024
AKR1B10	aldo-keto reductase family 1 member B10	O60218	2.042	0.0151	Cytoplasm	enzyme	unspecified application		57016	14187	286921
ALDH2	aldehyde dehydrogenase 2 family member	P05091	-1.155	4.53e-08	Cytoplasm	enzyme	unspecified application	ANS-6637,chlorpropamide,disulfiram,disulfiram/gemcitabine	217	11669	29539
ALDH1B1	aldehyde dehydrogenase 1 family member B1	P30837	-1.01	0.00118	Cytoplasm	enzyme			219	72535	298079
ALDH1L1	aldehyde dehydrogenase 1 family member L1	O75891	-1.195	0.000982	Cytoplasm	enzyme			10840	107747	64392
ALDH8A1	aldehyde dehydrogenase 8 family member A1	Q9H2A2	-1.73	1.36e-07	Cytoplasm	enzyme			64577	237320	685750
ALDOA	aldolase, fructose-bisphosphate A	P04075	1.593	7.85e-11	Cytoplasm	enzyme	unspecified application		226	11674	24189
ALYREF	Aly/REF export factor	Q86V81	2.011	3.21e-06	Nucleus	transcription regulator			10189		690585
AMDHD2	amidohydrolase domain containing 2	Q9Y303	2.551	0.000159	Nucleus	enzyme			51005	245847	302972
AMT	aminomethyltransferase	P48728	-1.13	7.07e-08	Cytoplasm	enzyme			275	434437	306586
ANAPC1	anaphase promoting complex subunit 1	Q9H1A4	3.064	1.4e-10	Nucleus	other			64682	17222	311412
ANLN	anillin actin binding protein	Q9NQW6	-1.843	3.88e-05	Cytoplasm	other			54443	68743	363031
ANP32A	acidic nuclear phosphoprotein 32 family member A	P39687	2.366	1.13e-06	Other	other			8125
ANP32B	acidic nuclear phosphoprotein 32 family member B	Q92688	1.535	0.012	Nucleus	other			10541
ANP32E	acidic nuclear phosphoprotein 32 family member E	Q9BTT0	1.356	0.000765	Nucleus	other			81611
ANXA2	annexin A2	P07355	1.968	2.46e-13	Plasma Membrane	other	diagnosis,unspecified application		302	12306	56611
ANXA4	annexin A4	P09525	1.214	3.31e-05	Plasma Membrane	other			307	11746	79124
ANXA5	annexin A5	P08758	1.351	3.99e-05	Plasma Membrane	transporter	diagnosis,efficacy		308	11747	25673
AP1M1	adaptor related protein complex 1 subunit mu 1	Q9BXS5	1.674	5.36e-05	Cytoplasm	transporter			8907	11767	306332
AP3D1	adaptor related protein complex 3 subunit delta 1	O14617	1.954	3.62e-05	Cytoplasm	transporter			8943	11776	314633
API5	apoptosis inhibitor 5	Q9BZZ5	1.107	0.00129	Cytoplasm	other			8539	11800	362170
APIP	APAF1 interacting protein	Q96GX9	3.181	3.76e-09	Cytoplasm	enzyme			51074	56369
APOA1	apolipoprotein A1	P02647	1.123	0.000148	Extracellular Space	transporter	diagnosis,efficacy,unspecified application	ISIS 681257	335	11806	25081
APOA4	apolipoprotein A4	P06727	1.96	0.00151	Extracellular Space	transporter	unspecified application		337	11808	25080
APOC2	apolipoprotein C2	P02655	1.322	0.0181	Extracellular Space	transporter	efficacy		344	11813	292697
APOE	apolipoprotein E	P02649	1.514	7.76e-06	Extracellular Space	transporter	diagnosis,efficacy,prognosis,unspecified application		348	11816	25728
ARAP1	ArfGAP with RhoGAP domain, ankyrin repeat and PH domain 1	Q96P48	-1.294	0.001	Cytoplasm	other			116985	69710	361617
ARF5	ADP ribosylation factor 5	P84085	1.068	0.0143	Cytoplasm	enzyme			381	11844	79117
ARG1	arginase 1	P05089	-1.034	0.00387	Cytoplasm	enzyme	unspecified application		383	11846	29221
ARHGAP10	Rho GTPase activating protein 10	A1A4S6	3.882	6.45e-06	Cytoplasm	other			79658	78514	688429
ARHGAP17	Rho GTPase activating protein 17	Q68EM7	2.923	0.000678	Cytoplasm	other			55114	70497	63994
ARHGEF16	Rho guanine nucleotide exchange factor 16	Q5VV41	-2.543	9.73e-08	Cytoplasm	other			27237	230972	687105
ARL8B	ADP ribosylation factor like GTPase 8B	Q9NVJ2	1.431	0.00223	Plasma Membrane	enzyme			55207	67166	500282
ARMC8	armadillo repeat containing 8	Q8IUR7	3.188	3.61e-06	Nucleus	other			25852	74125	315949
ARPC5	actin related protein 2/3 complex subunit 5	O15511	1.094	3.06e-11	Cytoplasm	other	unspecified application		10092	67771	360854
ASNA1	arsA arsenite transporter, ATP-binding, homolog 1 (bacterial)	O43681	1.384	2.05e-05	Nucleus	transporter			439	56495	288919
ASPDH	aspartate dehydrogenase domain containing	A6ND91	-1.528	5.65e-07	Other	other			554235	68352	292875
ASPG	asparaginase	Q86U10	-2.823	1.87e-07	Cytoplasm	enzyme			374569	104816	246266
ASPN	asporin	Q9BXN1	2.814	0.000247	Extracellular Space	other			54829	66695	306805
ASS1	argininosuccinate synthase 1	P00966	-1.228	2.87e-13	Cytoplasm	enzyme			445	11898	25698
ATG3	autophagy related 3	Q9NT62	1.3	0.00157	Cytoplasm	enzyme			64422	67841	171415
ATG16L1	autophagy related 16 like 1	Q676U5	-2.594	1.01e-08	Cytoplasm	enzyme			55054	77040	363278
ATOX1	antioxidant 1 copper chaperone	O00244	1.632	0.00902	Cytoplasm	transporter			475	11927	84355
ATPAF2	ATP synthase mitochondrial F1 complex assembly factor 2	Q8N5M1	-1.291	0.000972	Cytoplasm	other			91647	246782	303190
ATXN2L	ataxin 2 like	Q8WWM7	-1.351	0.0194	Nucleus	other			11273	233871	361649
AUH	AU RNA binding methylglutaconyl-CoA hydratase	Q13825	-1.266	2.71e-07	Cytoplasm	enzyme			549	11992	361215
AUP1	AUP1 lipid droplet regulating VLDL assembly factor	Q9Y679	3.881	8.64e-06	Cytoplasm	other			550	11993	680423
AZU1	azurocidin 1	P20160	2.138	0.00331	Cytoplasm	peptidase			566
B2M	beta-2-microglobulin	P61769	1.256	0.000193	Plasma Membrane	transmembrane receptor	disease progression,efficacy,safety,unspecified application	4'-iodo-4'-deoxydoxorubicin	567	12010	24223
BAG2	BCL2 associated athanogene 2	O95816	2.144	0.0036	Cytoplasm	other			9532	213539	690038
BAG6	BCL2 associated athanogene 6	P46379	1.579	1.13e-05	Nucleus	enzyme			7917	224727	94342
BANF1	barrier to autointegration factor 1	O75531	1.241	0.000395	Nucleus	other			8815	23825	114087
BAX	BCL2 associated X, apoptosis regulator	Q07812	2.598	3.99e-06	Cytoplasm	transporter	efficacy,prognosis,unspecified application
BCAM	basal cell adhesion molecule (Lutheran blood group)	P50895	1.506	0.0106	Plasma Membrane	transmembrane receptor	diagnosis
BCAT1	branched chain amino acid transaminase 1	P54687	-1.793	5.32e-06	Cytoplasm	enzyme
BCCIP	BRCA2 and CDKN1A interacting protein	Q9P287	1.65	0.000425	Nucleus	other
BCKDHA	branched chain keto acid dehydrogenase E1, alpha polypeptide	P12694	-1.126	2.09e-06	Cytoplasm	enzyme
BCKDHB	branched chain keto acid dehydrogenase E1 subunit beta	P21953	-1.731	3.4e-09	Cytoplasm	enzyme
BCKDK	branched chain ketoacid dehydrogenase kinase	O14874	-1.179	0.00078	Cytoplasm	kinase
BCLAF1	BCL2 associated transcription factor 1	Q9NYF8	2.59	0.000402	Nucleus	transcription regulator
BCS1L	BCS1 homolog, ubiquinol-cytochrome c reductase complex chaperone	Q9Y276	-1.037	0.00253	Cytoplasm	other
BDH1	3-hydroxybutyrate dehydrogenase 1	Q02338	-1.58	1.16e-06	Cytoplasm	enzyme
BHMT2	betaine--homocysteine S-methyltransferase 2	Q9H2M3	-1.423	3.56e-09	Cytoplasm	enzyme
BHMT	betaine--homocysteine S-methyltransferase	Q93088	-1.232	0.000669	Cytoplasm	enzyme
BLVRA	biliverdin reductase A	P53004	1.771	7.25e-08	Cytoplasm	enzyme
BMX	BMX non-receptor tyrosine kinase	P51813	2.988	2.52e-07	Cytoplasm	kinase
BRIX1	biogenesis of ribosomes BRX1	Q8TDN6	2.947	2.97e-06	Nucleus	other
BST1	bone marrow stromal cell antigen 1	Q10588	2.801	1.6e-06	Plasma Membrane	enzyme		MEN1112
BTBD18	BTB domain containing 18	B2RXH4	2.133	0.008	Nucleus	other
BUB3	BUB3 mitotic checkpoint protein	O43684	1.5	1.72e-07	Nucleus	other
BYSL	bystin like	Q13895	1.835	3.01e-06	Nucleus	other
C2	complement C2	P06681	2.68	2.52e-08	Extracellular Space	peptidase
C5	complement C5	P01031	1.42	0.0196	Extracellular Space	cytokine		eculizumab,IFX-1,IgG,ravulizumab
C6	complement C6	P13671	1.871	0.0031	Extracellular Space	other
C7	complement C7	P10643	1.627	0.0407	Extracellular Space	other
C11orf96	chromosome 11 open reading frame 96	Q7Z7L8	-4.074	5.95e-10	Other	other
C12orf10	chromosome 12 open reading frame 10	Q9HB07	2.587	0.000747	Nucleus	other
C5orf51	chromosome 5 open reading frame 51	A6NDU8	1.703	0.0162	Other	other
C8B	complement C8 beta chain	P07358	1.4	0.000675	Extracellular Space	other
C8G	complement C8 gamma chain	P07360	2.052	1.88e-05	Extracellular Space	transporter
CACYBP	calcyclin binding protein	Q9HB71	1.366	0.0147	Nucleus	other
CAD	carbamoyl-phosphate synthetase 2, aspartate transcarbamylase, and dihydroorotase	P27708	2.161	2.7e-09	Cytoplasm	enzyme
CAMK2D	calcium/calmodulin dependent protein kinase II delta	Q13557	1.817	0.00369	Cytoplasm	kinase
CAP2	cyclase associated actin cytoskeleton regulatory protein 2	P40123	2.909	7.02e-07	Plasma Membrane	other	disease progression
CAPG	capping actin protein, gelsolin like	P40121	2.555	1.19e-09	Nucleus	other
CAPN2	calpain 2	P17655	1.563	1.73e-07	Cytoplasm	peptidase
CAPN5	calpain 5	O15484	2.129	0.000472	Cytoplasm	peptidase
CAPNS1	calpain small subunit 1	P04632	1.216	0.000557	Cytoplasm	peptidase
CAPRIN1	cell cycle associated protein 1	Q14444	3.485	4.31e-07	Plasma Membrane	other
CAPS	calcyphosine	Q13938	4.556	2.59e-06	Cytoplasm	other
CARMIL1	capping protein regulator and myosin 1 linker 1	Q5VZK9	2.568	1.43e-06	Cytoplasm	enzyme
CASK	calcium/calmodulin dependent serine protein kinase	O14936	1.406	0.000173	Plasma Membrane	kinase
CASP3	caspase 3	P42574	5.011	2.42e-06	Cytoplasm	peptidase	diagnosis,disease progression,efficacy,unspecified application	caspase 3 inhibitor,emricasan
CAT	catalase	P04040	-1.273	8.13e-10	Cytoplasm	enzyme	diagnosis	fomepizole
CBX3	chromobox 3	Q13185	1.692	2.32e-08	Nucleus	transcription regulator
CBX8	chromobox 8	Q9HC52	1.779	0.00892	Nucleus	other
CCDC88B	coiled-coil domain containing 88B	A6NC98	-1.556	1.71e-06	Nucleus	enzyme
CD58	CD58 molecule	P19256	-1.514	5.24e-09	Plasma Membrane	transmembrane receptor
CD59	CD59 molecule (CD59 blood group)	P13987	1.73	0.000186	Plasma Membrane	other
CD63	CD63 molecule	P08962	3.324	1.59e-05	Plasma Membrane	other
CD74	CD74 molecule	P04233	1.233	0.000698	Plasma Membrane	transmembrane receptor		milatuzumab
CD2AP	CD2 associated protein	Q9Y5K6	3.269	1.34e-09	Cytoplasm	other
CDC37	cell division cycle 37	Q16543	1.633	1.29e-05	Cytoplasm	other
CDC25C	cell division cycle 25C	P30307	-2.815	2.51e-05	Nucleus	phosphatase
CDC37L1	cell division cycle 37 like 1	Q7L3B6	-1.319	0.000103	Cytoplasm	other
CDC5L	cell division cycle 5 like	Q99459	1.388	0.0295	Nucleus	transcription regulator
CELF1	CUGBP Elav-like family member 1	Q92879	1.189	0.000485	Cytoplasm	translation regulator
CENPF	centromere protein F	P49454	1.384	0.0284	Nucleus	other
CFL1	cofilin 1	P23528	1.116	5.1e-14	Nucleus	other
CFL2	cofilin 2	Q9Y281	2.53	1.82e-08	Extracellular Space	other
CHD4	chromodomain helicase DNA binding protein 4	Q14839	1.683	1.04e-07	Nucleus	enzyme
CHMP4B	charged multivesicular body protein 4B	Q9H444	3.097	4.39e-10	Cytoplasm	other
CHP1	calcineurin like EF-hand protein 1	Q99653	1.009	0.0231	Cytoplasm	transporter
CIAPIN1	cytokine induced apoptosis inhibitor 1	Q6FI81	-1.003	0.00437	Cytoplasm	other
CIRBP	cold inducible RNA binding protein	Q14011	1.696	1.08e-05	Nucleus	translation regulator
CKB	creatine kinase B	P12277	2.925	0.0249	Cytoplasm	kinase	safety
CLIC1	chloride intracellular channel 1	O00299	1.409	2.49e-11	Nucleus	ion channel
CLNS1A	chloride nucleotide-sensitive channel 1A	P54105	1.666	0.00571	Plasma Membrane	ion channel
CLPTM1L	CLPTM1 like	Q96KA5	2.78	0.0107	Other	other
CLTA	clathrin light chain A	P09496	1.075	2.06e-05	Plasma Membrane	other
CNN1	calponin 1	P51911	1.969	4.07e-05	Cytoplasm	other
CNN2	calponin 2	Q99439	2.151	5.02e-05	Cytoplasm	other
CNN3	calponin 3	Q15417	1.933	0.00398	Cytoplasm	other
CNOT7	CCR4-NOT transcription complex subunit 7	Q9UIV1	-2.908	9.6e-05	Nucleus	transcription regulator
CNP	2',3'-cyclic nucleotide 3' phosphodiesterase	P09543	1.1	0.00288	Cytoplasm	enzyme
COG2	component of oligomeric golgi complex 2	Q14746	2.073	0.00115	Cytoplasm	transporter	efficacy,safety
COL12A1	collagen type XII alpha 1 chain	Q99715	2.894	0.000161	Extracellular Space	other		collagenase clostridium histolyticum
COL18A1	collagen type XVIII alpha 1 chain	P39060	1.35	1.36e-08	Extracellular Space	other	diagnosis	collagenase clostridium histolyticum
COL3A1	collagen type III alpha 1 chain	P02461	2.466	0.00388	Extracellular Space	other	diagnosis,efficacy	collagenase clostridium histolyticum
COL4A1	collagen type IV alpha 1 chain	P02462	1.682	1.67e-08	Extracellular Space	other	diagnosis	collagenase clostridium histolyticum
COL4A2	collagen type IV alpha 2 chain	P08572	2.106	0.0113	Extracellular Space	other		collagenase clostridium histolyticum
COL4A3	collagen type IV alpha 3 chain	Q01955	2.651	0.0248	Extracellular Space	other	efficacy,unspecified application	collagenase clostridium histolyticum
COL5A1	collagen type V alpha 1 chain	P20908	4.859	1.71e-06	Extracellular Space	other		collagenase clostridium histolyticum
COL6A1	collagen type VI alpha 1 chain	P12109	1.245	0.0035	Extracellular Space	other		collagenase clostridium histolyticum
COL6A2	collagen type VI alpha 2 chain	P12110	1.508	5.1e-05	Extracellular Space	other		collagenase clostridium histolyticum
COL6A3	collagen type VI alpha 3 chain	P12111	1.147	0.000732	Extracellular Space	other		collagenase clostridium histolyticum
COL8A1	collagen type VIII alpha 1 chain	P27658	3.575	3.72e-07	Extracellular Space	other		collagenase clostridium histolyticum
COMMD3	COMM domain containing 3	Q9UBI1	1.062	2.89e-06	Extracellular Space	other
COPS4	COP9 signalosome subunit 4	Q9BT78	2.061	4.92e-07	Cytoplasm	peptidase
COPS6	COP9 signalosome subunit 6	Q7L5N1	2.957	2.12e-06	Nucleus	other
CORO1A	coronin 1A	P31146	2.593	0.029	Cytoplasm	other
COX20	cytochrome c oxidase assembly factor COX20	Q5RI15	-2.462	9.33e-05	Cytoplasm	other
CPB2	carboxypeptidase B2	Q96IY4	2.725	1.81e-05	Extracellular Space	peptidase
CPN2	carboxypeptidase N subunit 2	P22792	2.861	1.35e-05	Extracellular Space	peptidase
CPNE1	copine 1	Q99829	1.028	0.0307	Nucleus	transporter
CPS1	carbamoyl-phosphate synthase 1	P31327	-1.174	3.76e-08	Cytoplasm	enzyme	unspecified application	N-carbamyl-L-glutamate
CPSF7	cleavage and polyadenylation specific factor 7	Q8N684	1.938	1.03e-05	Nucleus	other
CRIP1	cysteine rich protein 1	P50238	2.354	0.00213	Cytoplasm	other	unspecified application
CRIP2	cysteine rich protein 2	P52943	1.711	6.78e-05	Nucleus	other
CRKL	CRK like proto-oncogene, adaptor protein	P46109	1.367	6.01e-06	Cytoplasm	kinase
CROCC	ciliary rootlet coiled-coil, rootletin	Q5TZA2	-1.152	6.47e-05	Plasma Membrane	other
CRP	C-reactive protein	P02741	3.219	0.00136	Extracellular Space	other	diagnosis,disease progression,efficacy,prognosis,safety,unspecified application
CRTAP	cartilage associated protein	O75718	2.822	3.52e-06	Extracellular Space	other
CSK	C-terminal Src kinase	P41240	1.149	0.0013	Cytoplasm	kinase		bosutinib
CSNK2B	casein kinase 2 beta	P67870	2.466	1.24e-07	Cytoplasm	kinase
CSPG4	chondroitin sulfate proteoglycan 4	Q6UVK1	-1.409	1.97e-08	Plasma Membrane	other	unspecified application
CSRP1	cysteine and glycine rich protein 1	P21291	2.073	3.88e-05	Nucleus	other
CSTA	cystatin A	P01040	1.35	0.0415	Cytoplasm	other
CTH	cystathionine gamma-lyase	P32929	-1.301	4.45e-07	Cytoplasm	enzyme
CTNNBL1	catenin beta like 1	Q8WYA6	1.343	8.04e-06	Nucleus	other
CTPS1	CTP synthase 1	P17812	4.874	1.18e-06	Nucleus	enzyme		cytidine triphosphate synthetase inhibitor
CTR9	CTR9 homolog, Paf1/RNA polymerase II complex component	Q6PD62	-1.075	0.00631	Nucleus	other
CTSH	cathepsin H	P09668	1.729	0.0448	Cytoplasm	peptidase
CTSS	cathepsin S	P25774	1.261	0.000788	Cytoplasm	peptidase
CTTN	cortactin	Q14247	1.543	0.0218	Plasma Membrane	other	efficacy
CUL3	cullin 3	Q13618	2.154	5.93e-06	Nucleus	enzyme
CUL4A	cullin 4A	Q13619	-1.015	0.0243	Nucleus	other
CYB5A	cytochrome b5 type A	P00167	-1.158	7.05e-05	Cytoplasm	enzyme
CYP4A11	cytochrome P450 family 4 subfamily A member 11	Q02928	-1.919	1.39e-10	Cytoplasm	enzyme
CYP4F2	cytochrome P450 family 4 subfamily F member 2	P78329	-1.714	0.000183	Cytoplasm	enzyme
CYP4F11	cytochrome P450 family 4 subfamily F member 11	Q9HBI6	-1.396	0.0092	Cytoplasm	enzyme
DBNL	drebrin like	Q9UJU6	1.33	7.69e-05	Cytoplasm	other	diagnosis
DCLK1	doublecortin like kinase 1	O15075	-1.171	0.00161	Plasma Membrane	kinase
DCPS	decapping enzyme, scavenger	Q96C86	1.41	0.000103	Nucleus	enzyme
DCTN3	dynactin subunit 3	O75935	1.865	4.03e-05	Nucleus	other
DCXR	dicarbonyl and L-xylulose reductase	Q7Z4W1	-1.345	4.02e-05	Cytoplasm	enzyme
DDAH2	dimethylarginine dimethylaminohydrolase 2	O95865	1.331	0.000315	Cytoplasm	enzyme
DDX17	DEAD-box helicase 17	Q92841	1.088	0.0115	Nucleus	enzyme	unspecified application
DDX24	DEAD-box helicase 24	Q9GZR7	4.51	3.69e-06	Nucleus	enzyme
DDX59	DEAD-box helicase 59	Q5T1V6	1.044	0.0468	Other	enzyme
DDX39A	DExD-box helicase 39A	O00148	4.554	5.65e-12	Nucleus	enzyme
DEK	DEK proto-oncogene	P35659	2.79	1.72e-14	Nucleus	transcription regulator
DENR	density regulated re-initiation and release factor	O43583	-2.42	3.69e-08	Other	other
DES	desmin	P17661	2.587	1.73e-06	Cytoplasm	other	unspecified application
DHRS1	dehydrogenase/reductase 1	Q96LJ7	-1.269	2.25e-05	Cytoplasm	enzyme
DHX9	DExH-box helicase 9	Q08211	1.153	3.53e-13	Nucleus	enzyme
DHX29	DExH-box helicase 29	Q7Z478	1.946	0.00338	Cytoplasm	enzyme
DHX57	DExH-box helicase 57	Q6P158	1.138	0.00137	Extracellular Space	other
DICER1	dicer 1, ribonuclease III	Q9UPY3	1.514	5.48e-05	Cytoplasm	enzyme
DIMT1	DIM1 dimethyladenosine transferase 1 homolog	Q9UNQ2	1.75	5.49e-06	Cytoplasm	enzyme
DKC1	dyskerin pseudouridine synthase 1	O60832	2.203	4.23e-09	Nucleus	enzyme
DMGDH	dimethylglycine dehydrogenase	Q9UI17	-1.354	2.41e-08	Cytoplasm	enzyme
DNAJC3	DnaJ heat shock protein family (Hsp40) member C3	Q13217	1.236	0.00169	Cytoplasm	other
DNAJC10	DnaJ heat shock protein family (Hsp40) member C10	Q8IXB1	2.606	5.37e-06	Cytoplasm	enzyme
DNMT1	DNA methyltransferase 1	P26358	1.543	0.00986	Nucleus	enzyme	diagnosis	4'-thio-2'-deoxycytidine,5-azacytidine,5-azacytidine/cytarabine/decitabine,5-azacytidine/decitabine,5-azacytidine/lenalidomide,5-azacytidine/sorafenib,cladribine/cytarabine/decitabine,decitabine,decitabine/imatinib,decitabine/sorafenib,fluorocyclopentenylcytosine
DOCK2	dedicator of cytokinesis 2	Q92608	1.443	7.9e-05	Cytoplasm	other
DPP3	dipeptidyl peptidase 3	Q9NY33	1.378	8.77e-06	Cytoplasm	peptidase
DPT	dermatopontin	Q07507	2.202	0.00534	Extracellular Space	other
DPY30	dpy-30 histone methyltransferase complex regulatory subunit	Q9C005	1.244	0.0121	Nucleus	other
DPYSL3	dihydropyrimidinase like 3	Q14195	2.251	1.16e-06	Cytoplasm	enzyme	unspecified application
DRAP1	DR1 associated protein 1	Q14919	13.344	2.61e-09	Nucleus	transcription regulator
DRG2	developmentally regulated GTP binding protein 2	P55039	2.039	0.000903	Cytoplasm	other
DSC2	desmocollin 2	Q02487	1.375	0.00114	Plasma Membrane	other	unspecified application
DTYMK	deoxythymidylate kinase	P23919	1.4	4.48e-05	Cytoplasm	kinase
DUOX2	dual oxidase 2	Q9NRD8	1.375	0.0349	Plasma Membrane	enzyme
DUSP23	dual specificity phosphatase 23	Q9BVJ7	1.202	0.00146	Cytoplasm	phosphatase
DYNC1I2	dynein cytoplasmic 1 intermediate chain 2	Q13409	1.582	0.0148	Cytoplasm	other
EBNA1BP2	EBNA1 binding protein 2	Q99848	5.023	6.03e-11	Nucleus	other
ECHDC2	enoyl-CoA hydratase domain containing 2	Q86YB7	-1.176	5.1e-05	Other	other
ECHS1	enoyl-CoA hydratase, short chain 1	P30084	-1.043	5.5e-11	Cytoplasm	enzyme
ECM1	extracellular matrix protein 1	Q16610	1.621	0.0433	Extracellular Space	transporter	diagnosis
ECPAS	Ecm29 proteasome adaptor and scaffold	Q5VYK3	1.253	0.00244	Cytoplasm	other
EEF1E1	eukaryotic translation elongation factor 1 epsilon 1	O43324	1.102	1.9e-05	Cytoplasm	translation regulator
EEF1G	eukaryotic translation elongation factor 1 gamma	P26641	1.067	6.36e-12	Cytoplasm	translation regulator
EFEMP1	EGF containing fibulin extracellular matrix protein 1	Q12805	2.733	1.08e-07	Extracellular Space	enzyme
EFHD2	EF-hand domain family member D2	Q96C19	1.452	4e-08	Other	other
EFTUD2	elongation factor Tu GTP binding domain containing 2	Q15029	1.853	4.81e-09	Nucleus	enzyme
EHBP1L1	EH domain binding protein 1 like 1	Q8N3D4	1.73	0.00138	Other	other
EHD1	EH domain containing 1	Q9H4M9	1.19	0.00799	Cytoplasm	other
EHD3	EH domain containing 3	Q9NZN3	-2.314	3.39e-13	Cytoplasm	other
EHD4	EH domain containing 4	Q9H223	1.978	4.41e-12	Plasma Membrane	enzyme
EHHADH	enoyl-CoA hydratase and 3-hydroxyacyl CoA dehydrogenase	Q08426	-1.01	0.00534	Cytoplasm	enzyme
EIF2A	eukaryotic translation initiation factor 2A	Q9BY44	3.098	9.73e-05	Cytoplasm	translation regulator
EIF2AK2	eukaryotic translation initiation factor 2 alpha kinase 2	P19525	1.758	0.00635	Cytoplasm	kinase
EIF2B4	eukaryotic translation initiation factor 2B subunit delta	Q9UI10	2.274	8.48e-06	Cytoplasm	other
EIF2B5	eukaryotic translation initiation factor 2B subunit epsilon	Q13144	2.043	4.13e-05	Cytoplasm	other
EIF2S2	eukaryotic translation initiation factor 2 subunit beta	P20042	1.09	0.0128	Cytoplasm	translation regulator
EIF2S3	eukaryotic translation initiation factor 2 subunit gamma	P41091	1.476	3.3e-05	Cytoplasm	translation regulator
EIF3H	eukaryotic translation initiation factor 3 subunit H	O15372	2.306	4.27e-12	Cytoplasm	other
EIF3J	eukaryotic translation initiation factor 3 subunit J	O75822	1.57	0.0326	Cytoplasm	translation regulator
EIF4B	eukaryotic translation initiation factor 4B	P23588	2.735	0.000395	Cytoplasm	translation regulator	unspecified application
EIF4G2	eukaryotic translation initiation factor 4 gamma 2	P78344	1.02	0.00118	Cytoplasm	translation regulator
EIF4H	eukaryotic translation initiation factor 4H	Q15056	2.511	4.02e-08	Cytoplasm	translation regulator
ELANE	elastase, neutrophil expressed	P08246	2.553	0.00783	Extracellular Space	peptidase	diagnosis,efficacy	2-O,3-O-desulfated heparin,SERPINA1
ELOB	elongin B	Q15370	1.079	0.000343	Nucleus	transcription regulator
ELP3	elongator acetyltransferase complex subunit 3	Q9H9T3	2.104	0.0148	Nucleus	enzyme
EMC8	ER membrane protein complex subunit 8	O43402	1.324	0.0239	Cytoplasm	other
EMD	emerin	P50402	3.461	6.68e-07	Nucleus	other
EML2	EMAP like 2	O95834	5.267	1.15e-06	Cytoplasm	other
ENO3	enolase 3	P13929	-2.886	2.12e-17	Cytoplasm	enzyme	unspecified application
ENOPH1	enolase-phosphatase 1	Q9UHY7	1.097	0.00511	Cytoplasm	enzyme
ENPP1	ectonucleotide pyrophosphatase/phosphodiesterase 1	P22413	-1.164	0.00209	Plasma Membrane	enzyme
ENY2	ENY2 transcription and export complex 2 subunit	Q9NPA8	4.347	1.15e-08	Nucleus	transcription regulator
EPB41	erythrocyte membrane protein band 4.1	P11171	1.556	0.00768	Plasma Membrane	other
EPHX2	epoxide hydrolase 2	P34913	-1.182	0.00248	Cytoplasm	enzyme	unspecified application
EPPK1	epiplakin 1	P58107	1.963	9.01e-05	Cytoplasm	other
EPS8	epidermal growth factor receptor pathway substrate 8	Q12929	1.609	7.62e-05	Plasma Membrane	peptidase
EPS15L1	epidermal growth factor receptor pathway substrate 15 like 1	Q9UBC2	2.57	0.000411	Plasma Membrane	other
EPX	eosinophil peroxidase	P11678	-1.453	6.96e-05	Cytoplasm	enzyme
ERBIN	erbb2 interacting protein	Q96RT1	2.312	6.19e-07	Cytoplasm	other
ERGIC3	ERGIC and golgi 3	Q9Y282	-1.493	0.000794	Cytoplasm	other
ERLIN1	ER lipid raft associated 1	O75477	-1.675	6.92e-11	Plasma Membrane	other
ESPN	espin	B1AK53	2.743	0.00243	Cytoplasm	other
ESYT2	extended synaptotagmin 2	A0FGR8	1.612	0.00914	Plasma Membrane	other
ETFDH	electron transfer flavoprotein dehydrogenase	Q16134	-1.473	5.18e-08	Cytoplasm	enzyme
EXOC2	exocyst complex component 2	Q96KP1	2.683	5.41e-05	Cytoplasm	transporter
EXOC7	exocyst complex component 7	Q9UPT5	3.259	2.1e-05	Cytoplasm	transporter
EXOSC9	exosome component 9	Q06265	2.509	0.000789	Nucleus	enzyme
EXOSC10	exosome component 10	Q01780	-1.157	1.54e-08	Nucleus	kinase
F2	coagulation factor II, thrombin	P00734	1.108	0.0226	Extracellular Space	peptidase	diagnosis,unspecified application	antithrombin alfa,argatroban,aspirin/bivalirudin,aspirin/dabigatran etexilate,bivalirudin,dabigatran,dabigatran etexilate,desirudin,enoxaparin,Fibrinogen,lepirudin,thrombin inhibitor,ulinastatin,ximelagatran
F10	coagulation factor X	P00742	2.138	6.05e-05	Extracellular Space	peptidase	efficacy	activated recombinant human factor VII,apixaban,aspirin/enoxaparin,aspirin/rivaroxaban,dalteparin,deligoparin,DPC 423,edoxaban,emicizumab,enoxaparin,enoxaparin/warfarin,F8,F9,fondaparinux,fondaparinux/warfarin,heparin,idraparinux,nematode anticoagulant protein c2,rivaroxaban,RPR 120844,RPR 208566,tifacogin
F11R	F11 receptor	Q9Y624	1.045	0.0207	Plasma Membrane	other	unspecified application
FABP5	fatty acid binding protein 5	Q01469	2.789	1.45e-11	Cytoplasm	transporter	disease progression
FAF2	Fas associated factor family member 2	Q96CS3	3.536	1.97e-05	Cytoplasm	other
FAHD2A	fumarylacetoacetate hydrolase domain containing 2A	Q96GK7	-1.121	0.000201	Other	enzyme
FAM120A	family with sequence similarity 120A	Q9NZB2	1.087	0.0217	Cytoplasm	other
FAM129B	family with sequence similarity 129 member B	Q96TA1	1.748	5.09e-07	Cytoplasm	transcription regulator
FAM3C	family with sequence similarity 3 member C	Q92520	2.415	4.19e-05	Extracellular Space	cytokine
FAM49B	family with sequence similarity 49 member B	Q9NUQ9	2.227	5.43e-09	Extracellular Space	other
FAM98A	family with sequence similarity 98 member A	Q8NCA5	1.692	0.000132	Other	other
FAM98B	family with sequence similarity 98 member B	Q52LJ0	2.779	2.98e-12	Nucleus	enzyme
FBLN1	fibulin 1	P23142	1.447	0.00639	Extracellular Space	other	unspecified application
FBLN2	fibulin 2	P98095	3.417	7.39e-14	Extracellular Space	other
FBLN5	fibulin 5	Q9UBX5	2.535	5.58e-06	Extracellular Space	other
FBP1	fructose-bisphosphatase 1	P09467	-1.248	0.000886	Cytoplasm	phosphatase
FBXL18	F-box and leucine rich repeat protein 18	Q96ME1	2.434	2.68e-05	Cytoplasm	enzyme
FCGBP	Fc fragment of IgG binding protein	Q9Y6R7	-1.193	0.0216	Extracellular Space	other
FCN1	ficolin 1	O00602	-2.025	0.00463	Extracellular Space	other	efficacy
FECH	ferrochelatase	P22830	-1.91	1.12e-08	Cytoplasm	enzyme
FEN1	flap structure-specific endonuclease 1	P39748	4.142	2.11e-09	Nucleus	enzyme
FGA	fibrinogen alpha chain	P02671	1.438	0.0294	Extracellular Space	other	diagnosis,unspecified application	F2
FGB	fibrinogen beta chain	P02675	1.455	0.00403	Extracellular Space	other	unspecified application	F2
FGG	fibrinogen gamma chain	P02679	1.621	0.00116	Extracellular Space	other		F2
FGGY	FGGY carbohydrate kinase domain containing	Q96C11	-2.093	1.36e-12	Other	other
FKBP5	FKBP prolyl isomerase 5	Q13451	1.089	0.0125	Nucleus	enzyme
FLAD1	flavin adenine dinucleotide synthetase 1	Q8NFF5	1.585	0.000237	Cytoplasm	enzyme
FLG2	filaggrin family member 2	Q5D862	2.364	0.000581	Cytoplasm	other
FLNA	filamin A	P21333	1.544	1.72e-07	Cytoplasm	other	unspecified application
FLNB	filamin B	O75369	1.115	5.75e-08	Cytoplasm	other	unspecified application
FMO5	flavin containing monooxygenase 5	P49326	-1.044	5.54e-05	Cytoplasm	enzyme
FMOD	fibromodulin	Q06828	3.145	2.66e-06	Extracellular Space	other
FN1	fibronectin 1	P02751	1.622	3.39e-09	Extracellular Space	enzyme	diagnosis,efficacy,prognosis,unspecified application	L19-IL2 monoclonal antibody-cytokine fusion protein,L19-IL2 monoclonal antibody-cytokine fusion protein/L19TNFalpha,L19TNFalpha,ocriplasmin
FN3KRP	fructosamine 3 kinase related protein	Q9HA64	1.038	0.00908	Cytoplasm	kinase
FNTA	farnesyltransferase, CAAX box, alpha	P49354	2.43	1.35e-06	Cytoplasm	enzyme		lonafarnib
FTCD	formimidoyltransferase cyclodeaminase	O95954	-1.585	2.1e-06	Cytoplasm	enzyme
FUBP1	far upstream element binding protein 1	Q96AE4	1.149	0.000338	Nucleus	transcription regulator
FUOM	fucose mutarotase	A2VDF0	-1.064	3.91e-05	Cytoplasm	enzyme
FUS	FUS RNA binding protein	P35637	3.68	4.63e-07	Nucleus	transcription regulator
FXR1	FMR1 autosomal homolog 1	P51114	3.684	1.03e-07	Cytoplasm	other
FYCO1	FYVE and coiled-coil domain containing 1	Q9BQS8	2.903	0.000385	Cytoplasm	other
G3BP2	G3BP stress granule assembly factor 2	Q9UN86	1.519	0.0415	Cytoplasm	enzyme	prognosis
G6PD	glucose-6-phosphate dehydrogenase	P11413	2.177	9.36e-11	Cytoplasm	enzyme
GALNT2	polypeptide N-acetylgalactosaminyltransferase 2	Q10471	1.311	0.00016	Cytoplasm	enzyme
GALNT7	polypeptide N-acetylgalactosaminyltransferase 7	Q86SF2	-1.791	3.93e-05	Cytoplasm	enzyme
GAN	gigaxonin	Q9H2C0	2.041	0.00142	Cytoplasm	other
GAR1	GAR1 ribonucleoprotein	Q9NY12	4.166	7.37e-08	Nucleus	other
GARS	glycyl-tRNA synthetase	P41250	1.052	0.018	Cytoplasm	enzyme
GATD1	glutamine amidotransferase like class 1 domain containing 1	Q8NB37	2.597	4.79e-05	Cytoplasm	other
GBA	glucosylceramidase beta	P04062	5.071	1.83e-10	Cytoplasm	enzyme
GBF1	golgi brefeldin A resistant guanine nucleotide exchange factor 1	Q92538	1.284	0.00119	Cytoplasm	other
GBP2	guanylate binding protein 2	P32456	2.85	5.21e-08	Cytoplasm	enzyme
GCA	grancalcin	P28676	1.281	9.32e-05	Cytoplasm	other
GCDH	glutaryl-CoA dehydrogenase	Q92947	-1.081	2.09e-05	Cytoplasm	enzyme
GCSH	glycine cleavage system protein H	P23434	-1.352	1.05e-06	Cytoplasm	enzyme
GDI1	GDP dissociation inhibitor 1	P31150	1.346	4.73e-05	Cytoplasm	other
GEMIN8	gem nuclear organelle associated protein 8	Q9NWZ8	-1.334	0.0308	Cytoplasm	other
GFPT1	glutamine--fructose-6-phosphate transaminase 1	Q06210	1.003	0.00226	Cytoplasm	enzyme
GHITM	growth hormone inducible transmembrane protein	Q9H3K2	-1.224	0.00836	Cytoplasm	other	unspecified application
GIMAP1	GTPase, IMAP family member 1	Q8WWP7	1.257	0.0177	Cytoplasm	other
GINS3	GINS complex subunit 3	Q9BRX5	1.649	0.00345	Nucleus	other
GLDC	glycine decarboxylase	P23378	-1.935	4.52e-05	Cytoplasm	enzyme
GLS	glutaminase	O94925	3.26	1.72e-07	Cytoplasm	enzyme	efficacy	CB-839
GLUD1	glutamate dehydrogenase 1	P00367	-1.275	5.1e-14	Cytoplasm	enzyme	unspecified application
GLYAT	glycine-N-acyltransferase	Q6IB77	-1.811	5.7e-08	Cytoplasm	enzyme
GLYATL1	glycine-N-acyltransferase like 1	Q969I3	-1.562	3.22e-09	Other	other
GLYCTK	glycerate kinase	Q8IVS8	-1.408	4.04e-08	Cytoplasm	kinase
GMDS	GDP-mannose 4,6-dehydratase	O60547	1.647	0.00271	Cytoplasm	enzyme
GMFB	glia maturation factor beta	P60983	1.836	3.22e-07	Cytoplasm	growth factor
GMFG	glia maturation factor gamma	O60234	2.293	0.000606	Cytoplasm	growth factor
GNB2	G protein subunit beta 2	P62879	1.311	5.33e-05	Plasma Membrane	enzyme
GNL1	G protein nucleolar 1 (putative)	P36915	2.085	0.000318	Nucleus	other
GNPDA1	glucosamine-6-phosphate deaminase 1	P46926	1.472	0.00164	Cytoplasm	enzyme
GOSR2	golgi SNAP receptor complex member 2	O14653	1.424	0.0145	Cytoplasm	transporter
GOT2	glutamic-oxaloacetic transaminase 2	P00505	-1.005	7.75e-12	Cytoplasm	enzyme
GP5	glycoprotein V platelet	P40197	3.009	0.000642	Plasma Membrane	other	efficacy
GPD2	glycerol-3-phosphate dehydrogenase 2	P43304	2.567	3.22e-09	Cytoplasm	enzyme
GPS1	G protein pathway suppressor 1	Q13098	1.474	0.0157	Nucleus	other
GPT	glutamic--pyruvic transaminase	P24298	-1.789	8.36e-12	Cytoplasm	enzyme
GPX2	glutathione peroxidase 2	P18283	1.518	0.0298	Cytoplasm	enzyme	efficacy
GRB2	growth factor receptor bound protein 2	P62993	1.933	2.52e-09	Cytoplasm	other		liposome-incorporated Grb2 antisense oligodeoxynucleotide
GRHPR	glyoxylate and hydroxypyruvate reductase	Q9UBQ7	-1.316	0.00246	Cytoplasm	enzyme
GSDMD	gasdermin D	P57764	1.007	0.00181	Extracellular Space	other
GSN	gelsolin	P06396	1.59	5.22e-06	Extracellular Space	other	disease progression,efficacy
GSTZ1	glutathione S-transferase zeta 1	O43708	-2.109	3.55e-10	Cytoplasm	enzyme
GTF2I	general transcription factor IIi	P78347	2.453	1.22e-07	Nucleus	transcription regulator
GTPBP1	GTP binding protein 1	O00178	1.849	1.86e-05	Cytoplasm	enzyme
GXYLT1	glucoside xylosyltransferase 1	Q4G148	-1.232	0.0439	Cytoplasm	enzyme
GYG1	glycogenin 1	P46976	1.061	0.0365	Cytoplasm	enzyme
GYG2	glycogenin 2	O15488	-1.727	2.35e-09	Cytoplasm	enzyme
H2AFY2	H2A histone family member Y2	Q9P0M6	1.861	0.0135	Nucleus	other
H2AFY	H2A histone family member Y	O75367	1.462	8.13e-14	Nucleus	other
HAO2	hydroxyacid oxidase 2	Q9NYQ3	-1.722	0.00355	Cytoplasm	enzyme
HARS	histidyl-tRNA synthetase	P12081	1.17	0.000192	Cytoplasm	enzyme
HAUS1	HAUS augmin like complex subunit 1	Q96CS2	-2.109	0.0032	Nucleus	other
HBZ	hemoglobin subunit zeta	P02008	1.654	0.001	Cytoplasm	transporter
HCLS1	hematopoietic cell-specific Lyn substrate 1	P14317	1.605	0.0444	Nucleus	other
HDAC6	histone deacetylase 6	Q9UBN7	-1.482	1e-07	Nucleus	transcription regulator	efficacy	belinostat,bortezomib/vorinostat,KA2507,pyroxamide,ricolinostat,trametinib/vorinostat,tributyrin,vorinostat
HEXB	hexosaminidase subunit beta	P07686	1.003	0.000436	Cytoplasm	enzyme
HGS	hepatocyte growth factor-regulated tyrosine kinase substrate	O14964	1.756	6.22e-09	Cytoplasm	other
HIP1	huntingtin interacting protein 1	O00291	1.151	0.00449	Cytoplasm	other
HIST1H1B	histone cluster 1 H1 family member b	P16401	2.555	1.08e-13	Nucleus	other
HIST1H1C	histone cluster 1 H1 family member c	P16403	2.867	0.0007	Nucleus	other
HIST2H2AB	histone cluster 2 H2A family member b	Q8IUE6	1.918	0.00815	Nucleus	other
HKDC1	hexokinase domain containing 1	Q2TB90	1.494	2.1e-05	Cytoplasm	kinase
HM13	histocompatibility minor 13	Q8TCT9	2.232	2.51e-05	Cytoplasm	peptidase
HMGA1	high mobility group AT-hook 1	P17096	5.108	2.01e-09	Nucleus	transcription regulator	unspecified application
HMGB1	high mobility group box 1	P09429	1.082	0.00623	Nucleus	transcription regulator	diagnosis
HMGB2	high mobility group box 2	P26583	2.038	2.94e-08	Nucleus	transcription regulator	unspecified application
HMGB3	high mobility group box 3	O15347	1.062	0.0264	Nucleus	other
HNF4A	hepatocyte nuclear factor 4 alpha	P41235	2.462	0.00105	Nucleus	transcription regulator	unspecified application
HNRNPA0	heterogeneous nuclear ribonucleoprotein A0	Q13151	1.653	1.24e-06	Nucleus	other
HNRNPA1	heterogeneous nuclear ribonucleoprotein A1	P09651	1.442	0.000178	Nucleus	enzyme
HNRNPA3	heterogeneous nuclear ribonucleoprotein A3	P51991	1.488	1.65e-15	Nucleus	other
HNRNPA2B1	heterogeneous nuclear ribonucleoprotein A2/B1	P22626	1.002	8.2e-12	Nucleus	other
HNRNPC	heterogeneous nuclear ribonucleoprotein C (C1/C2)	P07910	1.488	3.2e-16	Nucleus	other
HNRNPD	heterogeneous nuclear ribonucleoprotein D	Q14103	1.035	8.13e-14	Nucleus	transcription regulator
HNRNPH1	heterogeneous nuclear ribonucleoprotein H1	P31943	1.829	3.12e-07	Nucleus	other	diagnosis
HNRNPH2	heterogeneous nuclear ribonucleoprotein H2	P55795	1.205	2.26e-05	Nucleus	other
HNRNPK	heterogeneous nuclear ribonucleoprotein K	P61978	1.217	1.91e-14	Nucleus	transcription regulator	prognosis
HNRNPM	heterogeneous nuclear ribonucleoprotein M	P52272	1.196	3.14e-11	Nucleus	other
HNRNPR	heterogeneous nuclear ribonucleoprotein R	O43390	1.069	3.3e-14	Nucleus	other
HNRNPU	heterogeneous nuclear ribonucleoprotein U	Q00839	1.402	1.36e-12	Nucleus	transporter	unspecified application
HNRNPUL1	heterogeneous nuclear ribonucleoprotein U like 1	Q9BUJ2	1.761	3.11e-07	Nucleus	other	unspecified application
HOGA1	4-hydroxy-2-oxoglutarate aldolase 1	Q86XE5	-2.173	8.6e-07	Cytoplasm	enzyme
HPCAL1	hippocalcin like 1	P37235	2.719	0.000147	Cytoplasm	other
HPD	4-hydroxyphenylpyruvate dioxygenase	P32754	-1.076	0.000164	Cytoplasm	enzyme		nitisinone
HS1BP3	HCLS1 binding protein 3	Q53T59	2.313	2.65e-07	Other	other
HSBP1	heat shock factor binding protein 1	O75506	1.801	0.00311	Nucleus	other
HSD11B1	hydroxysteroid 11-beta dehydrogenase 1	P28845	-1.223	3.87e-07	Cytoplasm	enzyme
HSD17B7	hydroxysteroid 17-beta dehydrogenase 7	P56937	-1.138	0.000624	Cytoplasm	enzyme
HSP90AB1	heat shock protein 90 alpha family class B member 1	P08238	1.297	5.04e-13	Cytoplasm	enzyme		alvespimycin,cisplatin,retaspimycin,TAS-116
HSPA2	heat shock protein family A (Hsp70) member 2	P54652	2.074	8.16e-08	Cytoplasm	other
HSPB1	heat shock protein family B (small) member 1	P04792	1.362	2.51e-09	Cytoplasm	other	diagnosis,efficacy
HSPB6	heat shock protein family B (small) member 6	O14558	1.187	0.0429	Cytoplasm	other
HSPB8	heat shock protein family B (small) member 8	Q9UJY1	2.624	7.65e-05	Cytoplasm	kinase
HSPG2	heparan sulfate proteoglycan 2	P98160	1.398	4.63e-07	Extracellular Space	enzyme	unspecified application
HTRA2	HtrA serine peptidase 2	O43464	1.689	0.00774	Cytoplasm	peptidase
HYI	hydroxypyruvate isomerase (putative)	Q5T013	1.424	0.0452	Other	enzyme
ICAM1	intercellular adhesion molecule 1	P05362	1.76	4.65e-06	Plasma Membrane	transmembrane receptor	diagnosis,efficacy,prognosis,unspecified application
IDH3A	isocitrate dehydrogenase 3 (NAD(+)) alpha	P50213	1.499	2.48e-08	Cytoplasm	enzyme
IFI30	IFI30 lysosomal thiol reductase	P13284	2.18	0.000456	Cytoplasm	enzyme
IFITM3	interferon induced transmembrane protein 3	Q01628	2.195	0.000258	Plasma Membrane	other
IGFBP7	insulin like growth factor binding protein 7	Q16270	2.829	7.5e-05	Extracellular Space	transporter
IGHG2	immunoglobulin heavy constant gamma 2 (G2m marker)	P01859	1.274	0.0321	Plasma Membrane	other
IGHV3-33	immunoglobulin heavy variable 3-33	P01771	1.845	0.00342	Extracellular Space	other
IGKC	immunoglobulin kappa constant	P01834	1.062	0.00179	Extracellular Space	other	unspecified application
IGLL1/IGLL5	immunoglobulin lambda like polypeptide 1	B9A064	1.069	0.00502	Plasma Membrane	other
IGLV3-21	immunoglobulin lambda variable 3-21	P80748	1.389	0.00335	Extracellular Space	other
IKZF1	IKAROS family zinc finger 1	Q13422	2.323	0.0012	Nucleus	transcription regulator	efficacy
IL16	interleukin 16	Q14005	2.185	0.0251	Extracellular Space	cytokine
ILF2	interleukin enhancer binding factor 2	Q12905	1.234	1.38e-12	Nucleus	transcription regulator
ILF3	interleukin enhancer binding factor 3	Q12906	1.085	0.0188	Nucleus	transcription regulator
IMPA1	inositol monophosphatase 1	P29218	2.885	1.2e-05	Cytoplasm	phosphatase
IPO7	importin 7	O95373	2.581	7.02e-06	Nucleus	transporter
IPO9	importin 9	Q96P70	4.259	3.99e-06	Nucleus	transporter
IRF6	interferon regulatory factor 6	O14896	2.078	0.00236	Nucleus	transcription regulator
ISCU	iron-sulfur cluster assembly enzyme	Q9H1K1	3.251	1.58e-05	Cytoplasm	other
ISYNA1	inositol-3-phosphate synthase 1	Q9NPH2	-2.656	2.62e-05	Cytoplasm	enzyme
ITGA2	integrin subunit alpha 2	P17301	1.057	0.00135	Plasma Membrane	transmembrane receptor
ITGAL	integrin subunit alpha L	P20701	-1.614	4.25e-05	Plasma Membrane	transmembrane receptor		efalizumab
ITGAM	integrin subunit alpha M	P11215	-1.348	0.00266	Plasma Membrane	transmembrane receptor	efficacy,unspecified application
ITGAV	integrin subunit alpha V	P06756	1.685	9.6e-05	Plasma Membrane	transmembrane receptor	diagnosis	68Ga-NOTA-BBN-RGD,abciximab,abituzumab,cilengitide,CNTO 95,etaracizumab,fluciclatide F 18
ITSN2	intersectin 2	Q9NZM3	1.88	8.79e-06	Cytoplasm	other
JCHAIN	joining chain of multimeric IgA and IgM	P01591	1.264	0.0453	Extracellular Space	other
KANK2	KN motif and ankyrin repeat domains 2	Q63ZY3	1.36	0.00335	Nucleus	transcription regulator
KBTBD11	kelch repeat and BTB domain containing 11	O94819	-1.976	6.01e-05	Other	other
KHDRBS1	KH RNA binding domain containing, signal transduction associated 1	Q07666	1.217	0.00604	Nucleus	transcription regulator		CWP232291
KHSRP	KH-type splicing regulatory protein	Q92945	1.113	0.000395	Nucleus	enzyme	unspecified application
KIF11	kinesin family member 11	P52732	1.475	3.29e-05	Nucleus	other		4SC-205,ALN-VSP02,ARRY-520,AZD4877,ispinesib,litronesib,MK-0731,SB-743921
KIF13B	kinesin family member 13B	Q9NQT8	1.712	0.0164	Cytoplasm	other
KIF1BP	KIF1 binding protein	Q96EK5	-1.876	0.0036	Cytoplasm	enzyme
KIF5B	kinesin family member 5B	P33176	2.287	2.06e-06	Cytoplasm	other
KLC4	kinesin light chain 4	Q9NSK0	2.722	3.53e-05	Other	other
KMO	kynurenine 3-monooxygenase	O15229	-1.974	1.36e-12	Cytoplasm	enzyme
KPNA3	karyopherin subunit alpha 3	O00505	1.28	0.000134	Nucleus	transporter
KRR1	KRR1 small subunit processome component homolog	Q13601	3.336	6.95e-06	Nucleus	other
KRT73	keratin 73	Q86Y46	1.436	4.71e-07	Extracellular Space	other
KYNU	kynureninase	Q16719	-1.158	0.000286	Cytoplasm	enzyme
L2HGDH	L-2-hydroxyglutarate dehydrogenase	Q9H9P8	-2.019	4.19e-07	Cytoplasm	enzyme
LACTB	lactamase beta	P83111	-1.561	1.19e-09	Cytoplasm	peptidase
LAMA4	laminin subunit alpha 4	Q16363	2.89	5.75e-08	Extracellular Space	enzyme
LAMA5	laminin subunit alpha 5	O15230	1.071	0.029	Extracellular Space	other	diagnosis
LAMC1	laminin subunit gamma 1	P11047	1.682	1.2e-05	Extracellular Space	other
LAMTOR3	late endosomal/lysosomal adaptor, MAPK and MTOR activator 3	Q9UHA4	1.009	0.000116	Cytoplasm	other
LAMTOR5	late endosomal/lysosomal adaptor, MAPK and MTOR activator 5	O43504	1.06	0.000296	Cytoplasm	other
LANCL1	LanC like 1	O43813	1.898	2.17e-09	Plasma Membrane	enzyme
LBP	lipopolysaccharide binding protein	P18428	1.956	4.12e-05	Plasma Membrane	transporter	diagnosis,efficacy
LBR	lamin B receptor	Q14739	1.422	0.000152	Nucleus	enzyme
LCN2	lipocalin 2	P80188	-1.86	0.000154	Extracellular Space	transporter	diagnosis,unspecified application
LDHD	lactate dehydrogenase D	Q86WU2	-1.642	5.63e-10	Cytoplasm	enzyme
LEMD2	LEM domain containing 2	Q8NC56	3.501	1.02e-06	Nucleus	other
LETM1	leucine zipper and EF-hand containing transmembrane protein 1	O95202	1.823	2.13e-09	Cytoplasm	transporter
LGALS4	galectin 4	P56470	1.925	0.000136	Extracellular Space	other	diagnosis
LHPP	phospholysine phosphohistidine inorganic pyrophosphate phosphatase	Q9H008	-1.205	2.04e-09	Cytoplasm	phosphatase
LIMA1	LIM domain and actin binding 1	Q9UHB6	3.439	6.95e-06	Cytoplasm	other
LMCD1	LIM and cysteine rich domains 1	Q9NZU5	3.518	4.84e-06	Cytoplasm	transcription regulator	unspecified application
LMNA	lamin A/C	P02545	1.024	5.08e-10	Nucleus	other
LMNB1	lamin B1	P20700	1	0.0178	Nucleus	other
LMNB2	lamin B2	Q03252	1.038	0.00119	Nucleus	other
LPGAT1	lysophosphatidylglycerol acyltransferase 1	Q92604	1.73	0.000678	Cytoplasm	enzyme
LPP	LIM domain containing preferred translocation partner in lipoma	Q93052	1.02	0.00105	Nucleus	other
LRFN4	leucine rich repeat and fibronectin type III domain containing 4	Q6PJG9	-1.742	0.000395	Plasma Membrane	other
LRRFIP1	LRR binding FLII interacting protein 1	Q32MZ4	2.504	1.84e-06	Cytoplasm	transcription regulator
LSP1	lymphocyte specific protein 1	P33241	3.644	2.55e-08	Cytoplasm	other
LTBP1	latent transforming growth factor beta binding protein 1	Q14766	2.988	3.14e-05	Extracellular Space	other
LTF	lactotransferrin	P02788	1.438	0.00859	Extracellular Space	peptidase	efficacy,unspecified application
LTV1	LTV1 ribosome biogenesis factor	Q96GA3	-1.507	0.0454	Other	other
LUC7L2	LUC7 like 2, pre-mRNA splicing factor	Q9Y383	1.677	3.5e-07	Nucleus	other
LXN	latexin	Q9BS40	2.234	0.000536	Cytoplasm	other
MAIP1	matrix AAA peptidase interacting protein 1	Q8WWC4	-1.552	0.000405	Cytoplasm	other
MALSU1	mitochondrial assembly of ribosomal large subunit 1	Q96EH3	-1.393	0.017	Extracellular Space	other
MAN2B1	mannosidase alpha class 2B member 1	O00754	1.857	0.00409	Cytoplasm	enzyme
MANF	mesencephalic astrocyte derived neurotrophic factor	P55145	1.418	6.53e-09	Extracellular Space	other
MAP4	microtubule associated protein 4	P27816	1.407	1.26e-05	Cytoplasm	other	efficacy
MAP2K3	mitogen-activated protein kinase kinase 3	P46734	-2.602	2.5e-07	Cytoplasm	kinase
MAP4K2	mitogen-activated protein kinase kinase kinase kinase 2	Q12851	-1.737	0.0127	Cytoplasm	kinase
MAPK1	mitogen-activated protein kinase 1	P28482	1.58	2.65e-07	Cytoplasm	kinase	efficacy	ASN007,ASTX029,binimetinib,KO-947,LTT462,LY-3007113,LY3214996,MAP kinase1 inhibitor,pexmetinib,ulixertinib
MAPK3	mitogen-activated protein kinase 3	P27361	3.07	7.52e-08	Cytoplasm	kinase	efficacy	ASN007,ASTX029,KO-947,LY3214996,ulixertinib
MAPK14	mitogen-activated protein kinase 14	Q16539	1.275	8.71e-05	Cytoplasm	kinase	efficacy	p38 MAP kinase inhibitor,ralimetinib,RO-3201195,talmapimod
MAPRE1	microtubule associated protein RP/EB family member 1	Q15691	3.017	3.96e-16	Cytoplasm	other
MARCKS	myristoylated alanine rich protein kinase C substrate	P29966	2.999	0.000134	Plasma Membrane	other
MBL2	mannose binding lectin 2	P11226	-1.69	1.1e-07	Extracellular Space	other	diagnosis,efficacy
MCEE	methylmalonyl-CoA epimerase	Q96PE7	-2.32	7.31e-07	Cytoplasm	enzyme
MCM2	minichromosome maintenance complex component 2	P49736	3.778	3.02e-09	Nucleus	enzyme	diagnosis,disease progression,efficacy,unspecified application
MCM5	minichromosome maintenance complex component 5	P33992	4.861	4.23e-09	Nucleus	enzyme	disease progression
MCM7	minichromosome maintenance complex component 7	P33993	5.753	5.38e-10	Nucleus	enzyme	diagnosis,disease progression
MCTS1	MCTS1 re-initiation and release factor	Q9ULC4	3	0.000178	Cytoplasm	other
MDN1	midasin AAA ATPase 1	Q9NU22	-1.299	0.00483	Nucleus	other
ME2	malic enzyme 2	P23368	1.533	2.22e-05	Cytoplasm	enzyme
MECP2	methyl-CpG binding protein 2	P51608	3.627	1.43e-06	Nucleus	transcription regulator	unspecified application
MFGE8	milk fat globule-EGF factor 8 protein	Q08431	1.964	0.0018	Extracellular Space	other
MGAT1	mannosyl (alpha-1,3-)-glycoprotein beta-1,2-N-acetylglucosaminyltransferase	P26572	1.099	0.0194	Cytoplasm	enzyme
MKI67	marker of proliferation Ki-67	P46013	-1.09	0.000394	Nucleus	other	diagnosis,disease progression,efficacy,prognosis,response to therapy,unspecified application
MLPH	melanophilin	Q9BV36	1.424	0.0204	Cytoplasm	other
MLYCD	malonyl-CoA decarboxylase	O95822	-1.536	2.96e-10	Cytoplasm	enzyme
MMAA	metabolism of cobalamin associated A	Q8IVH4	-1.136	0.00169	Cytoplasm	enzyme
MMAB	metabolism of cobalamin associated B	Q96EY8	-1.094	3.21e-05	Cytoplasm	enzyme
MMP9	matrix metallopeptidase 9	P14780	1.273	0.0182	Extracellular Space	peptidase	diagnosis,disease progression,efficacy,prognosis,unspecified application	glucosamine,GS-5745,marimastat,MMP2 MMP9 inhibitor,prinomastat,rebimastat
MMS22L	MMS22 like, DNA repair protein	Q6ZRQ5	1.324	0.00542	Nucleus	other
MNDA	myeloid cell nuclear differentiation antigen	P41218	3.134	7.52e-06	Nucleus	other
MON2	MON2 homolog, regulator of endosome-to-Golgi trafficking	Q7Z3U7	1.799	0.00343	Cytoplasm	other
MORC3	MORC family CW-type zinc finger 3	Q14149	2.047	0.000206	Nucleus	other
MPC2	mitochondrial pyruvate carrier 2	O95563	-1.235	0.00352	Plasma Membrane	other
MRC1	mannose receptor C-type 1	P22897	-3.425	1.24e-05	Plasma Membrane	transmembrane receptor		technetium Tc 99m tilmanocept
MRC2	mannose receptor C type 2	Q9UBG0	3.373	3.15e-07	Plasma Membrane	transmembrane receptor
MRE11	MRE11 homolog, double strand break repair nuclease	P49959	1.523	0.0117	Nucleus	enzyme
MRPL11	mitochondrial ribosomal protein L11	Q9Y3B7	1.94	0.0036	Cytoplasm	other
MRPL12	mitochondrial ribosomal protein L12	P52815	1.741	4.54e-06	Cytoplasm	other
MRPL13	mitochondrial ribosomal protein L13	Q9BYD1	2.966	1.57e-10	Cytoplasm	other
MRPL14	mitochondrial ribosomal protein L14	Q6P1L8	3.086	5.18e-09	Cytoplasm	other
MRPL16	mitochondrial ribosomal protein L16	Q9NX20	4.156	7.32e-08	Cytoplasm	other
MRPL18	mitochondrial ribosomal protein L18	Q9H0U6	3.308	6.07e-05	Cytoplasm	translation regulator
MRPL19	mitochondrial ribosomal protein L19	P49406	1.5	0.000932	Cytoplasm	other
MRPL21	mitochondrial ribosomal protein L21	Q7Z2W9	-1.643	3.86e-08	Cytoplasm	other
MRPL37	mitochondrial ribosomal protein L37	Q9BZE1	2.522	4.56e-07	Cytoplasm	enzyme
MRPL41	mitochondrial ribosomal protein L41	Q8IXM3	3.851	8.95e-06	Cytoplasm	other
MRPL44	mitochondrial ribosomal protein L44	Q9H9J2	2.68	1.74e-05	Cytoplasm	enzyme
MRPL53	mitochondrial ribosomal protein L53	Q96EL3	5.429	2.01e-08	Cytoplasm	other
MRPS2	mitochondrial ribosomal protein S2	Q9Y399	1.567	0.00133	Cytoplasm	other
MRPS5	mitochondrial ribosomal protein S5	P82675	1.902	0.00819	Cytoplasm	other
MRPS9	mitochondrial ribosomal protein S9	P82933	4.242	5.21e-08	Cytoplasm	other
MRPS17	mitochondrial ribosomal protein S17	Q9Y2R5	2.834	1.48e-06	Cytoplasm	other
MRPS22	mitochondrial ribosomal protein S22	P82650	1.412	6.09e-05	Cytoplasm	other
MRPS27	mitochondrial ribosomal protein S27	Q92552	1.788	0.00025	Cytoplasm	other
MRPS28	mitochondrial ribosomal protein S28	Q9Y2Q9	3.084	3.2e-05	Cytoplasm	other
MRTO4	MRT4 homolog, ribosome maturation factor	Q9UKD2	-1.105	8.95e-06	Cytoplasm	other
MSRA	methionine sulfoxide reductase A	Q9UJ68	-1.517	9.05e-06	Cytoplasm	enzyme
MTHFD1	methylenetetrahydrofolate dehydrogenase, cyclohydrolase and formyltetrahydrofolate synthetase 1	P11586	-1.133	7.9e-11	Cytoplasm	enzyme
MVK	mevalonate kinase	Q03426	-1.226	1.27e-05	Cytoplasm	kinase
MVP	major vault protein	Q14764	1.463	0.00113	Nucleus	other
MX1	MX dynamin like GTPase 1	P20591	-1.34	7.91e-07	Cytoplasm	enzyme
MYBBP1A	MYB binding protein 1a	Q9BQG0	2.428	4.41e-12	Nucleus	transcription regulator	unspecified application
MYCBP2	MYC binding protein 2, E3 ubiquitin protein ligase	O75592	1.23	0.0489	Nucleus	enzyme
MYH9	myosin heavy chain 9	P35579	1.378	1.34e-12	Cytoplasm	enzyme	unspecified application
MYL6	myosin light chain 6	P60660	1.095	1.35e-11	Cytoplasm	enzyme
MYL9	myosin light chain 9	P24844	1.552	0.000262	Cytoplasm	other
MYO6	myosin VI	Q9UM54	1.824	3.93e-07	Cytoplasm	other
MYO1D	myosin ID	O94832	1.043	0.0177	Cytoplasm	enzyme
MYO7B	myosin VIIB	Q6PIF6	-1.213	1.51e-05	Cytoplasm	peptidase
N4BP3	NEDD4 binding protein 3	O15049	-2.559	3.89e-11	Cytoplasm	other
NAA50	N(alpha)-acetyltransferase 50, NatE catalytic subunit	Q9GZZ1	1.631	0.0328	Cytoplasm	enzyme
NACA4P	NACA family member 4, pseudogene	Q9BZK3	1.483	0.00013	Other	other
NADK2	NAD kinase 2, mitochondrial	Q4G0N4	-1.078	0.00729	Cytoplasm	kinase
NAE1	NEDD8 activating enzyme E1 subunit 1	Q13564	1.544	0.0371	Cytoplasm	enzyme
NAP1L1	nucleosome assembly protein 1 like 1	P55209	2.122	6.97e-06	Nucleus	other
NAP1L4	nucleosome assembly protein 1 like 4	Q99733	2.404	2.85e-14	Cytoplasm	other	unspecified application
NARS	asparaginyl-tRNA synthetase	O43776	1.323	1.61e-05	Cytoplasm	enzyme
NASP	nuclear autoantigenic sperm protein	P49321	1.786	0.00108	Nucleus	other
NAT8	N-acetyltransferase 8 (putative)	Q9UHE5	-1.182	1.96e-07	Nucleus	transcription regulator
NCBP1	nuclear cap binding protein subunit 1	Q09161	5.19	1.16e-06	Nucleus	other
NCEH1	neutral cholesterol ester hydrolase 1	Q6PIU2	1.65	0.000311	Plasma Membrane	enzyme
NCKAP1	NCK associated protein 1	Q9Y2A7	1.236	0.0122	Plasma Membrane	other
NCL	nucleolin	P19338	1.175	2.29e-10	Nucleus	other		AGRO 100
NCOA5	nuclear receptor coactivator 5	Q9HCD5	2.871	7e-11	Nucleus	other
NCSTN	nicastrin	Q92542	2.601	3.07e-09	Plasma Membrane	peptidase
NDRG1	N-myc downstream regulated 1	Q92597	1.81	2.36e-05	Nucleus	kinase
NDRG2	NDRG family member 2	Q9UN36	-1.107	0.00299	Cytoplasm	other
NDUFAF4	NADH:ubiquinone oxidoreductase complex assembly factor 4	Q9P032	2.541	0.00142	Cytoplasm	other
NDUFB5	NADH:ubiquinone oxidoreductase subunit B5	O43674	-1.014	0.00473	Cytoplasm	enzyme
NDUFB8	NADH:ubiquinone oxidoreductase subunit B8	O95169	-1.155	2.45e-08	Cytoplasm	enzyme
NDUFB11	NADH:ubiquinone oxidoreductase subunit B11	Q9NX14	1.454	0.00213	Cytoplasm	enzyme
NECAP2	NECAP endocytosis associated 2	Q9NVZ3	1.377	0.0427	Cytoplasm	other
NEDD8	neural precursor cell expressed, developmentally down-regulated 8	Q15843	1.006	0.0236	Nucleus	enzyme
NEDD4L	neural precursor cell expressed, developmentally down-regulated 4-like, E3 ubiquitin protein ligase	Q96PU5	3.337	1.06e-06	Cytoplasm	enzyme
NFKB1	nuclear factor kappa B subunit 1	P19838	1.252	0.00387	Nucleus	transcription regulator		bortezomib/dexamethasone/thalidomide,bortezomib/thalidomide,dexamethasone/thalidomide,prednisone/thalidomide,rituximab/thalidomide,thalidomide,triflusal
NFU1	NFU1 iron-sulfur cluster scaffold	Q9UMS0	2.221	0.0035	Cytoplasm	other
NID1	nidogen 1	P14543	2.008	7.65e-08	Extracellular Space	other
NID2	nidogen 2	Q14112	2.158	2.8e-07	Extracellular Space	other
NIF3L1	NGG1 interacting factor 3 like 1	Q9GZT8	1.371	0.0367	Cytoplasm	other
NIPSNAP2	nipsnap homolog 2	O75323	1.642	0.00042	Plasma Membrane	other
NME2	NME/NM23 nucleoside diphosphate kinase 2	P22392	1.056	0.0014	Nucleus	kinase
NME3	NME/NM23 nucleoside diphosphate kinase 3	Q13232	1.947	7.62e-05	Cytoplasm	kinase
NMNAT3	nicotinamide nucleotide adenylyltransferase 3	Q96T66	-1.604	0.00121	Cytoplasm	enzyme
NMT1	N-myristoyltransferase 1	P30419	1.902	6.28e-07	Cytoplasm	enzyme
NONO	non-POU domain containing octamer binding	Q15233	1.152	0.00022	Nucleus	transcription regulator
NOP10	NOP10 ribonucleoprotein	Q9NPE3	4.451	1.14e-08	Nucleus	other
NOP56	NOP56 ribonucleoprotein	O00567	1.485	8.05e-08	Nucleus	other
NOP58	NOP58 ribonucleoprotein	Q9Y2X3	1.48	1.16e-06	Nucleus	enzyme
NPC1	NPC intracellular cholesterol transporter 1	O15118	1.476	0.00235	Cytoplasm	transporter
NPM1	nucleophosmin 1	P06748	1.087	2.7e-14	Nucleus	transcription regulator	disease progression,unspecified application
NQO1	NAD(P)H quinone dehydrogenase 1	P15559	2.474	0.00191	Cytoplasm	enzyme	diagnosis,unspecified application
NRBP1	nuclear receptor binding protein 1	Q9UHY1	4.213	2.65e-06	Nucleus	kinase
NRDC	nardilysin convertase	O43847	1.537	0.00328	Cytoplasm	peptidase
NSL1	NSL1 component of MIS12 kinetochore complex	Q96IY1	-1.561	1.77e-07	Nucleus	other
NSUN2	NOP2/Sun RNA methyltransferase family member 2	Q08J23	3.345	3.04e-07	Nucleus	enzyme
NT5C2	5'-nucleotidase, cytosolic II	P49902	1.615	5.65e-07	Cytoplasm	phosphatase
NTPCR	nucleoside-triphosphatase, cancer-related	Q9BSD7	3.056	3.3e-05	Cytoplasm	other
NUDCD3	NudC domain containing 3	Q8IVD9	-1.865	0.000691	Cytoplasm	other
NUP35	nucleoporin 35	Q8NFH5	2.367	4.03e-05	Nucleus	transporter
NUP37	nucleoporin 37	Q8NFH4	-1.135	4.84e-05	Nucleus	transporter
NUP43	nucleoporin 43	Q8NFH3	4.037	3.09e-08	Nucleus	transporter
NUP62	nucleoporin 62	P37198	3.488	1.38e-06	Nucleus	transporter		dusquetide
NUP93	nucleoporin 93	Q8N1F7	3.28	5.21e-08	Nucleus	other
NUP107	nucleoporin 107	P57740	1.304	0.00681	Nucleus	other
NUP133	nucleoporin 133	Q8WUM0	-1.548	0.00145	Nucleus	other
NUP155	nucleoporin 155	O75694	3.184	1.26e-10	Nucleus	transporter
NUP205	nucleoporin 205	Q92621	1.302	0.0121	Nucleus	other
NUP210	nucleoporin 210	Q8TEM1	2.751	2.16e-10	Nucleus	transporter
NXF1	nuclear RNA export factor 1	Q9UBU9	-1.864	0.00122	Nucleus	other
OAS3	2'-5'-oligoadenylate synthetase 3	Q9Y6K5	1.433	0.0345	Cytoplasm	enzyme
OGDHL	oxoglutarate dehydrogenase like	Q9ULD0	-2.222	8.56e-12	Other	enzyme
OPTN	optineurin	Q96CV9	1.945	0.000114	Cytoplasm	other	unspecified application
OSBPL8	oxysterol binding protein like 8	Q9BZF1	2.364	1.93e-05	Plasma Membrane	transporter
PAAF1	proteasomal ATPase associated factor 1	Q9BRP4	2.692	0.000401	Other	other
PABPN1	poly(A) binding protein nuclear 1	Q86U42	4.649	2.63e-07	Nucleus	enzyme
PACSIN3	protein kinase C and casein kinase substrate in neurons 3	Q9UKS6	-1.503	0.000228	Cytoplasm	other
PAFAH2	platelet activating factor acetylhydrolase 2	Q99487	-1.387	0.00025	Cytoplasm	enzyme
PAH	phenylalanine hydroxylase	P00439	-2.066	1.31e-09	Cytoplasm	enzyme	efficacy	5,6,7,8-tetrahydrobiopterin,sapropterin
PAK2	p21 (RAC1) activated kinase 2	Q13177	1.855	1.05e-05	Cytoplasm	kinase
PALLD	palladin, cytoskeletal associated protein	Q8WX93	2.849	6.44e-06	Plasma Membrane	other
PARP1	poly(ADP-ribose) polymerase 1	P09874	1.276	0.000497	Nucleus	enzyme	diagnosis,efficacy,prognosis	[18F]fluorthanatrace,ABT-767,CEP-9722,E7449,fluzoparib,INO-1001,niraparib,olaparib,poly ADP ribose polymerase 1 inhibitor,rucaparib,SC10914,simmiparib,talazoparib,veliparib
PARP4	poly(ADP-ribose) polymerase family member 4	Q9UKK3	2.593	0.000216	Cytoplasm	enzyme
PBDC1	polysaccharide biosynthesis domain containing 1	Q9BVG4	1.871	9.43e-05	Other	other
PBLD	phenazine biosynthesis like protein domain containing	P30039	-1.715	1.45e-05	Cytoplasm	enzyme
PBXIP1	PBX homeobox interacting protein 1	Q96AQ6	2.704	2.07e-10	Nucleus	transcription regulator
PC	pyruvate carboxylase	P11498	-1.416	0.00126	Cytoplasm	enzyme	unspecified application
PCBP1	poly(rC) binding protein 1	Q15365	1.073	1.13e-12	Nucleus	translation regulator
PCBP4	poly(rC) binding protein 4	P57723	2.761	0.000538	Nucleus	other
PCK1	phosphoenolpyruvate carboxykinase 1	P35558	-1.242	9.71e-08	Cytoplasm	kinase	unspecified application
PCK2	phosphoenolpyruvate carboxykinase 2, mitochondrial	Q16822	-1.517	6.36e-13	Cytoplasm	kinase
PCNA	proliferating cell nuclear antigen	P12004	5.006	3.29e-15	Nucleus	enzyme	efficacy,prognosis,response to therapy
PDCD10	programmed cell death 10	Q9BUL8	2.856	6.97e-10	Cytoplasm	other
PDK3	pyruvate dehydrogenase kinase 3	Q15120	2.775	1.23e-05	Cytoplasm	kinase
PDLIM3	PDZ and LIM domain 3	Q53GG5	2.708	1.43e-05	Cytoplasm	other
PDLIM7	PDZ and LIM domain 7	Q9NR12	2.461	6.03e-08	Cytoplasm	other	unspecified application
PDXDC1	pyridoxal dependent decarboxylase domain containing 1	Q6P996	1.328	0.00443	Cytoplasm	other
PEA15	proliferation and apoptosis adaptor protein 15	Q15121	1.742	3.08e-07	Cytoplasm	transporter	prognosis
PES1	pescadillo ribosomal biogenesis factor 1	O00541	1.291	0.000837	Nucleus	other
PFAS	phosphoribosylformylglycinamidine synthase	O15067	1.433	0.00114	Cytoplasm	enzyme
PFDN1	prefoldin subunit 1	O60925	3.534	6.71e-06	Cytoplasm	transcription regulator
PFDN2	prefoldin subunit 2	Q9UHV9	2.184	5.19e-13	Cytoplasm	other
PFDN5	prefoldin subunit 5	Q99471	2.844	6.68e-17	Nucleus	transcription regulator
PFKM	phosphofructokinase, muscle	P08237	2.232	1.89e-05	Cytoplasm	kinase	unspecified application
PFKP	phosphofructokinase, platelet	Q01813	2.413	3.47e-08	Cytoplasm	kinase
PFN1	profilin 1	P07737	1.064	5.39e-11	Cytoplasm	other	unspecified application
PGM1	phosphoglucomutase 1	P36871	-1.069	2.07e-08	Cytoplasm	enzyme
PHKG2	phosphorylase kinase catalytic subunit gamma 2	P15735	-3.715	1.17e-05	Cytoplasm	kinase
PHPT1	phosphohistidine phosphatase 1	Q9NRX4	2.695	0.000283	Cytoplasm	phosphatase
PI4KA	phosphatidylinositol 4-kinase alpha	P42356	-1.315	0.00361	Cytoplasm	kinase
PIN4	peptidylprolyl cis/trans isomerase, NIMA-interacting 4	Q9Y237	2.767	7.47e-05	Nucleus	enzyme
PIP4K2B	phosphatidylinositol-5-phosphate 4-kinase type 2 beta	P78356	1.21	0.0334	Cytoplasm	kinase
PKM	pyruvate kinase M1/2	P14618	2.161	2.78e-12	Cytoplasm	kinase	unspecified application	CAP-232
PKN2	protein kinase N2	Q16513	-1.636	0.00333	Cytoplasm	kinase
PKP4	plakophilin 4	Q99569	-3.664	1.66e-08	Plasma Membrane	other
PLEKHG3	pleckstrin homology and RhoGEF domain containing G3	A1L390	-1.407	0.0104	Other	other
PLGRKT	plasminogen receptor with a C-terminal lysine	Q9HBL7	3.019	1.07e-06	Cytoplasm	other
PLIN2	perilipin 2	Q99541	2.559	0.000113	Plasma Membrane	other	disease progression
PLIN3	perilipin 3	O60664	2.552	6.26e-05	Cytoplasm	other
PLOD1	procollagen-lysine,2-oxoglutarate 5-dioxygenase 1	Q02809	3.17	7.25e-07	Cytoplasm	enzyme
PLOD3	procollagen-lysine,2-oxoglutarate 5-dioxygenase 3	O60568	2.401	3.04e-10	Cytoplasm	enzyme
PLP2	proteolipid protein 2	Q04941	2.333	1.13e-07	Cytoplasm	transporter
PLS1	plastin 1	Q14651	2.125	3.93e-07	Plasma Membrane	other
PML	promyelocytic leukemia	P29590	2.388	8.57e-07	Nucleus	transcription regulator		arsenic trioxide
PNN	pinin, desmosome associated protein	Q9H307	1.978	5.44e-09	Plasma Membrane	other
POLR2A	RNA polymerase II subunit A	P24928	1.425	0.00379	Nucleus	enzyme
POLR2B	RNA polymerase II subunit B	P30876	-1.043	0.0015	Nucleus	enzyme
POLR3B	RNA polymerase III subunit B	Q9NW08	1.536	0.000531	Nucleus	enzyme
PON3	paraoxonase 3	Q15166	-1.614	1.82e-08	Extracellular Space	enzyme
POSTN	periostin	Q15063	3.814	0.00586	Extracellular Space	other	unspecified application
POTEE/POTEF	POTE ankyrin domain family member E	A5A3E0	1.229	0.0103	Extracellular Space	other
PPA1	pyrophosphatase (inorganic) 1	Q15181	1.142	6.51e-08	Cytoplasm	enzyme
PPCS	phosphopantothenoylcysteine synthetase	Q9HAB8	2.802	3.28e-15	Cytoplasm	enzyme
PPIC	peptidylprolyl isomerase C	P45877	2.033	2.7e-06	Cytoplasm	enzyme
PPIF	peptidylprolyl isomerase F	P30405	-1.185	0.00632	Cytoplasm	enzyme
PPIL1	peptidylprolyl isomerase like 1	Q9Y3C6	2.078	1.39e-06	Plasma Membrane	enzyme
PPM1F	protein phosphatase, Mg2+/Mn2+ dependent 1F	P49593	2.108	0.00455	Cytoplasm	phosphatase
PPME1	protein phosphatase methylesterase 1	Q9Y570	-1.451	0.012	Nucleus	enzyme
PPP1CA	protein phosphatase 1 catalytic subunit alpha	P62136	1.063	2.12e-05	Cytoplasm	phosphatase
PPP1CB	protein phosphatase 1 catalytic subunit beta	P62140	1.264	9.33e-05	Cytoplasm	phosphatase
PPP1R12A	protein phosphatase 1 regulatory subunit 12A	O14974	1.548	0.00669	Cytoplasm	phosphatase
PPP2R5D	protein phosphatase 2 regulatory subunit B'delta	Q14738	3.214	1.13e-10	Nucleus	phosphatase
PPP5C	protein phosphatase 5 catalytic subunit	P53041	1.848	0.000765	Nucleus	phosphatase
PRKAB2	protein kinase AMP-activated non-catalytic subunit beta 2	O43741	-1.015	0.00171	Cytoplasm	kinase
PRKCD	protein kinase C delta	Q05655	1.317	0.00779	Cytoplasm	kinase		ingenol mebutate
PRKDC	protein kinase, DNA-activated, catalytic subunit	P78527	1.197	4.79e-05	Nucleus	kinase		CC-115,MSC2490484A,P7170
PRMT5	protein arginine methyltransferase 5	O14744	2.373	1.19e-07	Cytoplasm	enzyme		GSK3326595
PRODH2	proline dehydrogenase 2	Q9UF12	-2.034	4.97e-14	Cytoplasm	enzyme
PRPF4	pre-mRNA processing factor 4	O43172	3.512	2.8e-07	Nucleus	other
PRPF6	pre-mRNA processing factor 6	O94906	4.573	7.53e-06	Nucleus	transcription regulator
PRPF31	pre-mRNA processing factor 31	Q8WWY3	1.126	2.62e-05	Nucleus	other
PRPF40A	pre-mRNA processing factor 40 homolog A	O75400	1.241	0.000149	Nucleus	other
PRPH	peripherin	P41219	2.282	8.26e-07	Plasma Membrane	other
PRRC2A	proline rich coiled-coil 2A	P48634	2.065	0.00469	Cytoplasm	other	safety
PSIP1	PC4 and SFRS1 interacting protein 1	O75475	2.235	1.95e-08	Nucleus	transcription regulator	disease progression
PSMD9	proteasome 26S subunit, non-ATPase 9	O00233	1.069	0.0357	Cytoplasm	transcription regulator
PSMD10	proteasome 26S subunit, non-ATPase 10	O75832	2.435	0.000773	Cytoplasm	transcription regulator
PSME3	proteasome activator subunit 3	P61289	4.153	3.28e-15	Cytoplasm	peptidase
PSPC1	paraspeckle component 1	Q8WXF1	2.953	2.64e-07	Nucleus	transcription regulator
PSPH	phosphoserine phosphatase	P78330	4.073	9.79e-08	Cytoplasm	phosphatase	diagnosis
PTBP1	polypyrimidine tract binding protein 1	P26599	1.139	9.33e-15	Nucleus	enzyme	unspecified application
PTBP3	polypyrimidine tract binding protein 3	O95758	2.28	5.16e-05	Nucleus	other
PTCD3	pentatricopeptide repeat domain 3	Q96EY7	1.993	5.97e-08	Cytoplasm	other
PTGES2	prostaglandin E synthase 2	Q9H7Z7	1.165	0.0475	Cytoplasm	transcription regulator
PTK2B	protein tyrosine kinase 2 beta	Q14289	-1.08	0.0013	Cytoplasm	kinase		CT-707,lorlatinib,PF-562271
PTPN1	protein tyrosine phosphatase, non-receptor type 1	P18031	-1.304	1.17e-08	Cytoplasm	phosphatase	prognosis	protein tyrosine phosphatase 1B inhibitor,trodusquemine
PUF60	poly(U) binding splicing factor 60	Q9UHX1	2.08	5.04e-08	Nucleus	other
PUS1	pseudouridine synthase 1	Q9Y606	2.797	2.75e-06	Nucleus	enzyme
PYGL	glycogen phosphorylase L	P06737	-1.423	3.23e-05	Cytoplasm	enzyme
PYGM	glycogen phosphorylase, muscle associated	P11217	1.298	0.048	Cytoplasm	enzyme
PYM1	PYM homolog 1, exon junction complex associated factor	Q9BRP8	2.355	0.00191	Nucleus	other
RAB13	RAB13, member RAS oncogene family	P51153	2.132	0.000659	Plasma Membrane	enzyme
RAB21	RAB21, member RAS oncogene family	Q9UL25	1.045	0.0165	Cytoplasm	enzyme
RAB31	RAB31, member RAS oncogene family	Q13636	1.332	0.000485	Cytoplasm	enzyme
RAB11B	RAB11B, member RAS oncogene family	Q15907	1.347	0.00737	Cytoplasm	enzyme
RAB1A	RAB1A, member RAS oncogene family	P62820	1.04	1.68e-13	Cytoplasm	enzyme
RAB27A	RAB27A, member RAS oncogene family	P51159	1.604	0.0175	Cytoplasm	enzyme
RAB3GAP2	RAB3 GTPase activating non-catalytic protein subunit 2	Q9H2M9	2.084	0.00552	Cytoplasm	enzyme
RAB6C/RAB6D	RAB6C, member RAS oncogene family	Q9H0N0	1.263	0.00819	Cytoplasm	enzyme
RAB8B	RAB8B, member RAS oncogene family	Q92930	1.61	0.0035	Cytoplasm	enzyme
RABGAP1	RAB GTPase activating protein 1	Q9Y3P9	2.629	4.48e-05	Cytoplasm	other
RABL3	RAB, member of RAS oncogene family like 3	Q5HYI8	1.086	0.0273	Other	enzyme
RABL6	RAB, member RAS oncogene family like 6	Q3YEC7	3.93	3.19e-08	Cytoplasm	other
RACGAP1	Rac GTPase activating protein 1	Q9H0H5	-3.336	1.26e-05	Cytoplasm	transporter	unspecified application
RAD21	RAD21 cohesin complex component	O60216	-2.736	0.0002	Nucleus	transcription regulator
RALY	RALY heterogeneous nuclear ribonucleoprotein	Q9UKM9	2.221	2.23e-10	Nucleus	transcription regulator
RAN	RAN, member RAS oncogene family	P62826	1.392	2.07e-15	Nucleus	enzyme
RANBP1	RAN binding protein 1	P43487	1.107	0.00157	Nucleus	other	unspecified application
RANGAP1	Ran GTPase activating protein 1	P46060	3.741	6.35e-12	Nucleus	other
RBBP4	RB binding protein 4, chromatin remodeling factor	Q09028	2.776	2.55e-08	Nucleus	enzyme
RBBP7	RB binding protein 7, chromatin remodeling factor	Q16576	-1.927	0.0039	Nucleus	transcription regulator
RBM3	RNA binding motif protein 3	P98179	3.301	6.81e-15	Cytoplasm	other
RBM14	RNA binding motif protein 14	Q96PK6	2.591	8.95e-06	Nucleus	transcription regulator
RBM25	RNA binding motif protein 25	P49756	1.039	0.00758	Nucleus	other
RBM39	RNA binding motif protein 39	Q14498	1.571	0.000296	Nucleus	transcription regulator
RBM8A	RNA binding motif protein 8A	Q9Y5S9	1.636	0.00104	Nucleus	other
RBMX	RNA binding motif protein X-linked	P38159	3.152	0.00546	Nucleus	other
RBP5	retinol binding protein 5	P82980	-1.394	0.0031	Cytoplasm	transporter
RCC2	regulator of chromosome condensation 2	Q9P258	-1.084	0.000172	Nucleus	other
RELA	RELA proto-oncogene, NF-kB subunit	Q04206	3.1	6.38e-05	Nucleus	transcription regulator	diagnosis,efficacy	NF-kappaB decoy
RENBP	renin binding protein	P51606	2.483	0.0304	Cytoplasm	enzyme
RHOB	ras homolog family member B	P62745	1.51	0.0031	Cytoplasm	enzyme
RHOC	ras homolog family member C	P08134	2.009	0.00382	Plasma Membrane	enzyme	diagnosis,prognosis
RHOG	ras homolog family member G	P84095	1.54	1.01e-07	Cytoplasm	enzyme
RIC8A	RIC8 guanine nucleotide exchange factor A	Q9NPQ8	1.602	0.0032	Cytoplasm	other
RIDA	reactive intermediate imine deaminase A homolog	P52758	-1.196	0.000233	Cytoplasm	enzyme
RMDN1	regulator of microtubule dynamics 1	Q96DB5	3.103	1.61e-05	Cytoplasm	other
RMDN2	regulator of microtubule dynamics 2	Q96LZ7	-1.745	2.97e-06	Cytoplasm	other
RPA1	replication protein A1	P27694	2.075	8.48e-06	Nucleus	other
RPA2	replication protein A2	P15927	3.94	8.79e-06	Nucleus	other
RPA3	replication protein A3	P35244	1.045	3.19e-05	Nucleus	other
RPF2	ribosome production factor 2 homolog	Q9H7B2	2.611	0.00078	Nucleus	other
RPL8	ribosomal protein L8	P62917	1.29	0.000434	Cytoplasm	other
RPL35	ribosomal protein L35	P42766	1.033	0.0169	Cytoplasm	other
RPL13A	ribosomal protein L13a	P40429	2.206	0.00544	Cytoplasm	other
RPL37A	ribosomal protein L37a	P61513	1.523	0.00209	Cytoplasm	other
RPP25	ribonuclease P and MRP subunit p25	Q9BUL9	1.039	0.00568	Nucleus	other
RPRD1B	regulation of nuclear pre-mRNA domain containing 1B	Q9NQG5	1.127	0.0147	Nucleus	other
RPS27	ribosomal protein S27	P42677	1.052	0.0157	Cytoplasm	other		empesertib
RPS6KA3	ribosomal protein S6 kinase A3	P51812	1.258	2.82e-05	Cytoplasm	kinase
RPS6KB1	ribosomal protein S6 kinase B1	P23443	2.302	2.44e-06	Cytoplasm	kinase	diagnosis,efficacy,prognosis
RRAS	RAS related	P10301	1.324	0.000159	Cytoplasm	enzyme
RSL1D1	ribosomal L1 domain containing 1	O76021	2.585	2.7e-07	Nucleus	other
RTN4	reticulon 4	Q9NQC3	1.959	4.16e-06	Cytoplasm	other	diagnosis
RUVBL1	RuvB like AAA ATPase 1	Q9Y265	1.159	0.000119	Nucleus	transcription regulator
S100A10	S100 calcium binding protein A10	P60903	1.977	4.15e-05	Cytoplasm	other
S100A11	S100 calcium binding protein A11	P31949	1.694	0.011	Cytoplasm	other
S100A13	S100 calcium binding protein A13	Q99584	1.098	0.0102	Cytoplasm	other
S100A16	S100 calcium binding protein A16	Q96FQ6	1.559	8.95e-06	Nucleus	other
SAFB	scaffold attachment factor B	Q15424	3.986	1.56e-08	Nucleus	other
SAP18	Sin3A associated protein 18	O00422	4.982	1.31e-09	Nucleus	transcription regulator	unspecified application
SARDH	sarcosine dehydrogenase	Q9UL12	-1.791	3.48e-09	Cytoplasm	enzyme
SASH1	SAM and SH3 domain containing 1	O94885	-1.3	0.0226	Extracellular Space	other
SAT2	spermidine/spermine N1-acetyltransferase family member 2	Q96F10	-1.023	2.32e-06	Plasma Membrane	enzyme
SCEL	sciellin	O95171	-1.559	0.00653	Cytoplasm	other
SCPEP1	serine carboxypeptidase 1	Q9HB40	1.551	0.000639	Cytoplasm	peptidase
SCRN2	secernin 2	Q96FV2	-1.314	0.000575	Extracellular Space	other
SDCBP	syndecan binding protein	O00560	4.417	2.66e-06	Plasma Membrane	enzyme
SDF2L1	stromal cell derived factor 2 like 1	Q9HCN8	1.422	0.0303	Cytoplasm	other
SDHA	succinate dehydrogenase complex flavoprotein subunit A	P31040	-1.046	5.75e-06	Cytoplasm	enzyme
SDSL	serine dehydratase like	Q96GA7	-1.032	7.07e-06	Cytoplasm	enzyme
SEC14L2	SEC14 like lipid binding 2	O76054	-1.131	1.71e-06	Cytoplasm	transporter
SEC23IP	SEC23 interacting protein	Q9Y6Y8	1.539	1.16e-06	Cytoplasm	other
SEPSECS	Sep (O-phosphoserine) tRNA:Sec (selenocysteine) tRNA synthase	Q9HD40	-1.569	2.38e-05	Cytoplasm	enzyme
SEPT1	septin 1	Q8WYJ6	1.531	0.0176	Cytoplasm	enzyme
SEPT6	septin 6	Q14141	3.038	1.67e-08	Cytoplasm	other
SEPT7	septin 7	Q16181	1.114	0.000791	Cytoplasm	other
SEPT9	septin 9	Q9UHD8	1.062	0.0151	Cytoplasm	enzyme	diagnosis
SEPT11	septin 11	Q9NVA2	1.695	2.65e-05	Nucleus	other
SERPINA1	serpin family A member 1	P01009	1.199	8.3e-07	Extracellular Space	other	diagnosis,unspecified application
SERPINA4	serpin family A member 4	P29622	1.661	0.0144	Extracellular Space	other
SERPINH1	serpin family H member 1	P50454	1.379	0.000163	Extracellular Space	other
SET	SET nuclear proto-oncogene	Q01105	1.482	9.12e-06	Nucleus	phosphatase	prognosis
SF3A1	splicing factor 3a subunit 1	Q15459	3.054	1.07e-06	Nucleus	other
SF3A3	splicing factor 3a subunit 3	Q12874	1.255	0.000813	Nucleus	other
SF3B2	splicing factor 3b subunit 2	Q13435	1.432	0.000316	Nucleus	other
SF3B4	splicing factor 3b subunit 4	Q15427	2.45	5.15e-05	Nucleus	other
SF3B6	splicing factor 3b subunit 6	Q9Y3B4	3.538	1.88e-08	Nucleus	other
SFN	stratifin	P31947	3.062	1.91e-07	Cytoplasm	other	prognosis
SFXN2	sideroflexin 2	Q96NB2	-1.317	0.0309	Cytoplasm	transporter
SFXN3	sideroflexin 3	Q9BWM7	-1.146	0.0143	Cytoplasm	transporter
SGSH	N-sulfoglucosamine sulfohydrolase	P51688	1.972	0.00287	Cytoplasm	enzyme
SH3BGRL3	SH3 domain binding glutamate rich protein like 3	Q9H299	2.025	2.22e-05	Nucleus	other
SHMT1	serine hydroxymethyltransferase 1	P34896	-1.067	0.000103	Cytoplasm	enzyme		mimosine
SIN3A	SIN3 transcription regulator family member A	Q96ST3	-1.569	0.00772	Nucleus	transcription regulator
SIPA1	signal-induced proliferation-associated 1	Q96FS4	1.677	0.0003	Cytoplasm	other
SIRT1	sirtuin 1	Q96EB6	-1.28	0.00393	Nucleus	transcription regulator
SLC12A2	solute carrier family 12 member 2	P55011	3.334	0.00338	Plasma Membrane	transporter		bumetanide,quinethazone
SLC25A6	solute carrier family 25 member 6	P12236	2.743	1.86e-12	Cytoplasm	transporter		clodronic acid
SLC25A24	solute carrier family 25 member 24	Q6NUK1	3.066	1.42e-08	Cytoplasm	transporter
SLC27A2	solute carrier family 27 member 2	O14975	-1.244	1.35e-08	Cytoplasm	transporter
SLC30A7	solute carrier family 30 member 7	Q8NEW0	2.074	2.61e-05	Cytoplasm	transporter
SLC39A14	solute carrier family 39 member 14	Q15043	-1.538	1.11e-07	Plasma Membrane	transporter	unspecified application
SLC4A1AP	solute carrier family 4 member 1 adaptor protein	Q9BWU0	4.425	1.62e-05	Nucleus	transporter
SLC9A3R2	SLC9A3 regulator 2	Q15599	-1.001	1.4e-07	Plasma Membrane	transporter
SMC4	structural maintenance of chromosomes 4	Q9NTJ3	2.863	1.08e-05	Nucleus	transporter
SMC1A	structural maintenance of chromosomes 1A	Q14683	1.199	0.000818	Nucleus	transporter
SMS	spermine synthase	P52788	2.642	3.89e-07	Cytoplasm	enzyme		(±)-2-hydroxyoleic acid
SNRNP200	small nuclear ribonucleoprotein U5 subunit 200	O75643	1.041	0.00406	Nucleus	enzyme
SNRPA1	small nuclear ribonucleoprotein polypeptide A'	P09661	1.317	6.25e-06	Nucleus	other
SNRPD3	small nuclear ribonucleoprotein D3 polypeptide	P62318	1.043	1.65e-15	Nucleus	other
SNRPF	small nuclear ribonucleoprotein polypeptide F	P62306	1.334	0.00402	Nucleus	other
SNX1	sorting nexin 1	Q13596	2.109	1.83e-06	Cytoplasm	transporter
SNX4	sorting nexin 4	O95219	2.367	2.76e-05	Cytoplasm	transporter
SNX5	sorting nexin 5	Q9Y5X3	1.415	0.000385	Cytoplasm	transporter
SNX12	sorting nexin 12	Q9UMY4	1.945	3.38e-05	Cytoplasm	transporter
SNX27	sorting nexin family member 27	Q96L92	2.34	1.48e-06	Cytoplasm	other
SOD3	superoxide dismutase 3	P08294	1.577	0.0446	Extracellular Space	enzyme
SON	SON DNA binding protein	P18583	2.366	2.06e-06	Nucleus	other
SPATS2L	spermatogenesis associated serine rich 2 like	Q9NUQ6	-1.619	0.00133	Nucleus	other
SQSTM1	sequestosome 1	Q13501	3.474	0.000155	Cytoplasm	transcription regulator
SRC	SRC proto-oncogene, non-receptor tyrosine kinase	P12931	2.256	0.00113	Cytoplasm	kinase	diagnosis,disease progression,efficacy,prognosis,response to therapy	AZD0424,AZM-475271,bosutinib,bosutinib/hydroxyurea/ponatinib,dasatinib,dasatinib/erlotinib,dasatinib/nilotinib,docetaxel/nintedanib,KX-01,nintedanib,pexmetinib,repotrectinib,saracatinib,XL999
SRGAP2	SLIT-ROBO Rho GTPase activating protein 2	O75044	2.578	1.1e-07	Cytoplasm	other
SRI	sorcin	P30626	1.324	0.00116	Cytoplasm	transporter
SRL	sarcalumenin	Q86TD4	-2.002	0.000137	Cytoplasm	other
SRM	spermidine synthase	P19623	1.452	3.97e-06	Cytoplasm	enzyme
SRP9	signal recognition particle 9	P49458	1.921	0.000818	Cytoplasm	other
SRP14	signal recognition particle 14	P37108	1.32	5.68e-05	Cytoplasm	other
SRP54	signal recognition particle 54	P61011	1.857	0.001	Cytoplasm	other
SRP68	signal recognition particle 68	Q9UHB9	1.318	0.000204	Nucleus	other
SRP72	signal recognition particle 72	O76094	1.437	0.00206	Nucleus	kinase
SRSF1	serine and arginine rich splicing factor 1	Q07955	1.117	0.0163	Nucleus	other
SRSF2	serine and arginine rich splicing factor 2	Q01130	2.087	0.000317	Nucleus	transcription regulator
SRSF3	serine and arginine rich splicing factor 3	P84103	1.394	1.22e-12	Nucleus	other
SRSF5	serine and arginine rich splicing factor 5	Q13243	1.678	0.00105	Nucleus	other
SRSF6	serine and arginine rich splicing factor 6	Q13247	1.662	0.00965	Nucleus	other
SRSF7	serine and arginine rich splicing factor 7	Q16629	1.07	0.0338	Nucleus	other
SRSF9	serine and arginine rich splicing factor 9	Q13242	2.338	1.52e-09	Nucleus	enzyme
SRSF10	serine and arginine rich splicing factor 10	O75494	1.797	0.000996	Nucleus	other
SSRP1	structure specific recognition protein 1	Q08945	3.069	2.13e-09	Nucleus	transcription regulator
STAMBP	STAM binding protein	O95630	1.764	0.0033	Nucleus	enzyme
STEAP3	STEAP3 metalloreductase	Q658P3	-2.265	3.96e-16	Cytoplasm	transporter
STK24	serine/threonine kinase 24	Q9Y6E0	1.353	0.0253	Cytoplasm	kinase		bosutinib
STMN1	stathmin 1	P16949	4.889	5.09e-09	Cytoplasm	other	efficacy
STT3B	STT3 oligosaccharyltransferase complex catalytic subunit B	Q8TCJ2	1.636	0.0222	Cytoplasm	enzyme
STX7	syntaxin 7	O15400	1.808	1.09e-07	Plasma Membrane	transporter
STXBP2	syntaxin binding protein 2	Q15833	1.655	0.0248	Plasma Membrane	transporter
SUB1	SUB1 homolog, transcriptional regulator	P53999	1.741	9.17e-05	Nucleus	transcription regulator
SUGP2	SURP and G-patch domain containing 2	Q8IX01	-2.131	8.05e-10	Nucleus	other
SULT1A1	sulfotransferase family 1A member 1	P50225	-1.367	0.000375	Cytoplasm	enzyme	diagnosis
SULT1B1	sulfotransferase family 1B member 1	O43704	-2.307	1.3e-08	Cytoplasm	enzyme
SUN2	Sad1 and UNC84 domain containing 2	Q9UH99	1.388	0.0146	Nucleus	other
SUOX	sulfite oxidase	P51687	-1.623	4.23e-09	Cytoplasm	enzyme
SYNE1	spectrin repeat containing nuclear envelope protein 1	Q8NF91	1.033	0.0118	Nucleus	other
SYPL1	synaptophysin like 1	Q16563	1.123	0.00174	Plasma Membrane	transporter
TAGLN2	transgelin 2	P37802	1.812	3.96e-16	Cytoplasm	other
TAP1	transporter 1, ATP binding cassette subfamily B member	Q03518	2.052	9e-05	Cytoplasm	transporter
TAP2	transporter 2, ATP binding cassette subfamily B member	Q03519	2.933	5.01e-05	Cytoplasm	transporter
TAPBP	TAP binding protein	O15533	1.46	2.04e-06	Cytoplasm	transporter
TARS2	threonyl-tRNA synthetase 2, mitochondrial	Q9BW92	1.384	0.000888	Cytoplasm	enzyme
TAX1BP3	Tax1 binding protein 3	O14907	2.695	2.73e-05	Cytoplasm	transcription regulator	unspecified application
TBC1D1	TBC1 domain family member 1	Q86TI0	-2.961	3.28e-05	Nucleus	other
TBC1D4	TBC1 domain family member 4	O60343	-3.194	2.62e-05	Cytoplasm	other
TBCB	tubulin folding cofactor B	Q99426	3.253	5.93e-06	Cytoplasm	other
TBL2	transducin beta like 2	Q9Y4P3	3.284	0.00327	Plasma Membrane	other
TCEA1	transcription elongation factor A1	P23193	3.226	1.24e-08	Nucleus	transcription regulator
TCERG1	transcription elongation regulator 1	O14776	4.178	1.65e-07	Nucleus	transcription regulator
TES	testin LIM domain protein	Q9UGI8	3.891	1.39e-12	Plasma Membrane	other
TGFBI	transforming growth factor beta induced	Q15582	2.523	5.18e-07	Extracellular Space	other
THBS1	thrombospondin 1	P07996	2.904	0.00037	Extracellular Space	other	diagnosis,efficacy
THBS2	thrombospondin 2	P35442	4.367	3.11e-07	Extracellular Space	other
THNSL1	threonine synthase like 1	Q8IYQ7	-1.72	1.18e-10	Nucleus	kinase
THRAP3	thyroid hormone receptor associated protein 3	Q9Y2W1	1.397	3.48e-05	Nucleus	transcription regulator
THY1	Thy-1 cell surface antigen	P04216	2.302	1.75e-08	Plasma Membrane	other	diagnosis,disease progression
THYN1	thymocyte nuclear protein 1	Q9P016	1.162	0.044	Nucleus	other
TIMM9	translocase of inner mitochondrial membrane 9	Q9Y5J7	2.309	0.00042	Cytoplasm	transporter
TIMM10B	translocase of inner mitochondrial membrane 10B	Q9Y5J6	1.895	0.00404	Cytoplasm	transporter
TIMP1	TIMP metallopeptidase inhibitor 1	P01033	3.617	6.64e-07	Extracellular Space	cytokine	diagnosis,disease progression,efficacy,prognosis,unspecified application
TIPRL	TOR signaling pathway regulator	O75663	1.798	8.31e-07	Cytoplasm	other
TJP1	tight junction protein 1	Q07157	1.201	0.00117	Plasma Membrane	other
TK2	thymidine kinase 2	O00142	-1.024	0.0261	Cytoplasm	kinase
TM7SF2	transmembrane 7 superfamily member 2	O76062	-1.415	4.76e-07	Cytoplasm	enzyme
TM9SF2	transmembrane 9 superfamily member 2	Q99805	1.373	0.0116	Plasma Membrane	transporter
TM9SF4	transmembrane 9 superfamily member 4	Q92544	2.357	9.2e-05	Cytoplasm	transporter
TMCO1	transmembrane and coiled-coil domains 1	Q9UM00	1.446	9.17e-05	Cytoplasm	ion channel
TMEM43	transmembrane protein 43	Q9BTV4	1.311	0.000616	Nucleus	other
TMF1	TATA element modulatory factor 1	P82094	2.06	0.000602	Cytoplasm	transcription regulator
TMPO	thymopoietin	P42167	1.391	0.00124	Nucleus	other
TMX1	thioredoxin related transmembrane protein 1	Q9H3N1	1.059	0.000263	Cytoplasm	enzyme
TNC	tenascin C	P24821	2.001	0.0078	Extracellular Space	other	diagnosis,response to therapy	F16-IL2 fusion protein
TNS1	tensin 1	Q9HBL0	1.109	0.0281	Plasma Membrane	other
TOMM22	translocase of outer mitochondrial membrane 22	Q9NS69	2.224	9.69e-07	Cytoplasm	transporter
TOMM40	translocase of outer mitochondrial membrane 40	O96008	1.247	0.00134	Cytoplasm	ion channel
TOP2B	DNA topoisomerase II beta	Q02880	2.734	1.03e-13	Nucleus	enzyme		alemtuzumab/cyclophosphamide/fludarabine phosphate/mitoxantrone,AQ4N,arsenic trioxide/daunorubicin/tretinoin,becatecarin,bevacizumab/etoposide,capecitabine/epirubicin/oxaliplatin,carboplatin/doxorubicin,chlorambucil/epirubicin,chlorambucil/mitoxantrone/prednisone,chlorambucil/mitoxantrone/prednisone/rituximab,chloroquinoxaline sulfonamide,cisplatin/doxorubicin,cisplatin/doxorubicin/ifosfamide,cis…
TP53I3	tumor protein p53 inducible protein 3	Q53FA7	3.958	9.97e-10	Cytoplasm	enzyme
TP53RK	TP53 regulating kinase	Q96S44	1.583	2.88e-05	Nucleus	kinase
TPD52	tumor protein D52	P55327	2.54	4.44e-07	Cytoplasm	other	diagnosis,unspecified application
TPD52L2	TPD52 like 2	O43399	2.561	3.47e-12	Cytoplasm	other	prognosis,unspecified application
TPM2	tropomyosin 2	P07951	3.358	1.24e-06	Other	other	diagnosis
TPM3	tropomyosin 3	P06753	1.015	0.00141	Cytoplasm	other	diagnosis,unspecified application	AZD-7451
TPR	translocated promoter region, nuclear basket protein	P12270	2.076	3.18e-06	Nucleus	other
TRA2A	transformer 2 alpha homolog	Q13595	4.181	8.49e-06	Nucleus	other
TRA2B	transformer 2 beta homolog	P62995	1.038	0.000698	Nucleus	other
TRAPPC3	trafficking protein particle complex 3	O43617	1.649	1.84e-06	Cytoplasm	other		birabresib
TRAPPC8	trafficking protein particle complex 8	Q9Y2L5	-1.002	0.0252	Cytoplasm	transporter
TRIM22	tripartite motif containing 22	Q8IYM9	-1.503	0.00773	Cytoplasm	transcription regulator
TRIM28	tripartite motif containing 28	Q13263	1.441	0.00129	Nucleus	transcription regulator
TRNT1	tRNA nucleotidyl transferase 1	Q96Q11	2.875	4.92e-07	Cytoplasm	enzyme
TRRAP	transformation/transcription domain associated protein	Q9Y4A5	-4.127	4.76e-07	Nucleus	transcription regulator
TSFM	Ts translation elongation factor, mitochondrial	P43897	2.193	0.00019	Cytoplasm	translation regulator
TSN	translin	Q15631	2.769	1.16e-07	Nucleus	other	unspecified application
TSPYL1	TSPY like 1	Q9H0U9	-2.317	1.16e-05	Nucleus	other
TUBA1C	tubulin alpha 1c	Q9BQE3	-2.192	3.14e-05	Cytoplasm	other		bevacizumab/docetaxel,bevacizumab/paclitaxel,bevacizumab/paclitaxel/pemetrexed,bevacizumab/paclitaxel/topotecan,capecitabine/docetaxel,capecitabine/docetaxel/gemcitabine,capecitabine/docetaxel/oxaliplatin/trastuzumab,cevipabulin,colchicine,colchicine/probenecid,cyclophosphamide/daunorubicin/imatinib/prednisolone/vincristine,cyclophosphamide/daunorubicin/imatinib/prednisone/vincristine,cyclophosph…
TUBB	tubulin beta class I	P07437	1.712	2e-15	Cytoplasm	other	efficacy	ixabepilone
TUBB2A	tubulin beta 2A class IIa	Q13885	1.357	0.0353	Cytoplasm	other		ABT-751,batabulin,bevacizumab/docetaxel,bevacizumab/paclitaxel,bevacizumab/paclitaxel/pemetrexed,bevacizumab/paclitaxel/topotecan,BMS-275183,capecitabine/docetaxel,capecitabine/docetaxel/gemcitabine,capecitabine/docetaxel/oxaliplatin/trastuzumab,cevipabulin,colchicine,colchicine/probenecid,crolibulin,cyclophosphamide/daunorubicin/imatinib/prednisolone/vincristine,cyclophosphamide/daunorubicin/ima…
TUBB4B	tubulin beta 4B class IVb	P68371	1.678	1.9e-06	Cytoplasm	other	unspecified application	ABT-751,bevacizumab/docetaxel,bevacizumab/paclitaxel,bevacizumab/paclitaxel/pemetrexed,bevacizumab/paclitaxel/topotecan,BMS-275183,capecitabine/docetaxel,capecitabine/docetaxel/gemcitabine,capecitabine/docetaxel/oxaliplatin/trastuzumab,cevipabulin,colchicine,colchicine/probenecid,cyclophosphamide/daunorubicin/imatinib/prednisolone/vincristine,cyclophosphamide/daunorubicin/imatinib/prednisone/vinc…
TXLNG	taxilin gamma	Q9NUQ3	-1.809	0.000141	Nucleus	other
TXNDC9	thioredoxin domain containing 9	O14530	1.85	0.00389	Cytoplasm	other
TXNRD2	thioredoxin reductase 2	Q9NNW7	-1.505	1.33e-07	Cytoplasm	enzyme
U2AF2	U2 small nuclear RNA auxiliary factor 2	P26368	1.142	1.04e-13	Nucleus	other
U2AF1/U2AF1L5	U2 small nuclear RNA auxiliary factor 1	Q01081	1.167	0.00899	Nucleus	other
UBAP2L	ubiquitin associated protein 2 like	Q14157	2	8.52e-06	Nucleus	other
UBE2I	ubiquitin conjugating enzyme E2 I	P63279	1.451	9.67e-05	Nucleus	enzyme	disease progression
UBE2V1	ubiquitin conjugating enzyme E2 V1	Q13404	1.211	3.19e-05	Nucleus	transcription regulator
UBTF	upstream binding transcription factor	P17480	4.782	8.58e-09	Nucleus	transcription regulator
UCHL5	ubiquitin C-terminal hydrolase L5	Q9Y5K5	1.284	0.00149	Cytoplasm	peptidase		VLX1570
UFC1	ubiquitin-fold modifier conjugating enzyme 1	Q9Y3C8	1.59	6.23e-05	Cytoplasm	enzyme
UFD1	ubiquitin recognition factor in ER associated degradation 1	Q92890	1.831	2.81e-07	Cytoplasm	peptidase
UGT2B7	UDP glucuronosyltransferase family 2 member B7	P16662	-1.821	3.44e-06	Cytoplasm	enzyme
UPB1	beta-ureidopropionase 1	Q9UBR1	-1.128	0.0202	Cytoplasm	enzyme
URB2	URB2 ribosome biogenesis homolog	Q14146	1.049	0.0405	Nucleus	other
USP19	ubiquitin specific peptidase 19	O94966	1.318	0.00419	Cytoplasm	peptidase
VASP	vasodilator stimulated phosphoprotein	P50552	2.369	1.06e-07	Plasma Membrane	other	efficacy
VBP1	VHL binding protein 1	P61758	1.246	0.000892	Cytoplasm	other	unspecified application
VCAN	versican	P13611	3.058	9.1e-10	Extracellular Space	other
VIM	vimentin	P08670	1.357	7.05e-08	Cytoplasm	other	diagnosis,efficacy,prognosis,unspecified application
VPS54	VPS54 subunit of GARP complex	Q9P1Q0	-1.166	0.0348	Extracellular Space	other
VPS26A	VPS26, retromer complex component A	O75436	1.009	0.0394	Cytoplasm	transporter
VWA1	von Willebrand factor A domain containing 1	Q6PCB0	2.085	4.76e-07	Extracellular Space	other
VWF	von Willebrand factor	P04275	1.903	0.000893	Extracellular Space	other	diagnosis,efficacy,prognosis	caplacizumab
WASF2	WAS protein family member 2	Q9Y6W5	2.366	1.68e-05	Plasma Membrane	other
WASHC4	WASH complex subunit 4	Q2M389	1.775	4.22e-06	Cytoplasm	other
WASHC5	WASH complex subunit 5	Q12768	1.143	0.000818	Cytoplasm	other
WDR3	WD repeat domain 3	Q9UNX4	-3.338	3.31e-05	Cytoplasm	other
WDR62	WD repeat domain 62	O43379	-2.284	9.1e-07	Nucleus	other
WDR91	WD repeat domain 91	A4D1P6	1.091	0.015	Cytoplasm	other
XRCC5	X-ray repair cross complementing 5	P13010	1.447	7.11e-15	Nucleus	enzyme	unspecified application
YARS2	tyrosyl-tRNA synthetase 2	Q9Y2Z4	1.453	0.00216	Cytoplasm	enzyme
YBX1	Y-box binding protein 1	P67809	2.424	1.29e-05	Nucleus	transcription regulator
YKT6	YKT6 v-SNARE homolog	O15498	1.894	0.0231	Cytoplasm	enzyme
YWHAB	tyrosine 3-monooxygenase/tryptophan 5-monooxygenase activation protein beta	P31946	1.057	8.13e-14	Cytoplasm	other
YWHAQ	tyrosine 3-monooxygenase/tryptophan 5-monooxygenase activation protein theta	P27348	1.116	0.000975	Cytoplasm	other
ZADH2	zinc binding alcohol dehydrogenase domain containing 2	Q8N4Q0	-1.519	0.000117	Cytoplasm	enzyme
ZC3H12D	zinc finger CCCH-type containing 12D	A2A288	1.678	0.000419	Cytoplasm	other
ZNF207	zinc finger protein 207	O43670	1.506	0.000164	Nucleus	transcription regulator
ZYX	zyxin	Q15942	1.822	9.91e-06	Plasma Membrane	other	unspecified application

## Sheet: C_disease_function
Categories	Diseases or Functions Annotation	p-value	Predicted Activation State	Activation z-score	Molecules	Molecules
Cancer,Organismal Injury and Abnormalities	Non-hematological solid tumor	1.04e-48		-0.099	AADAT,AASS,ABAT,ABCD1,ABCF2,ABHD11,ACAA1,ACAA2,ACACB,ACAD11,ACADM,ACADS,ACADSB,ACOT7,ACOT9,ACOX2,ACSL1,ACSL4,ACSL5,ACSM2A,ACSM3,ACSM5,ACTBL2,ACTL6A,ACTR2,ADAR,ADD3,ADGRE5,ADH1B,ADH1C,ADH6,ADRM1,ADSS,AEBP1,AES,AFMID,AGA,AGL,AGPS,AGR2,AGR3,AGRN,AGXT2,AHCYL1,AHNAK,AHNAK2,AHSA1,AIMP1,AKAP2,AKR1B10,ALDH1B1,ALDH1L1,ALDH2,ALDH8A1,ALDOA,ALYREF,AMDHD2,AMT,ANAPC1,ANLN,ANP32A,ANP32B,ANP32E,ANXA2,ANXA4,ANXA5…	959
Cancer,Organismal Injury and Abnormalities	Nonhematologic malignant neoplasm	1.09e-48		-0.425	AADAT,AASS,ABAT,ABCD1,ABCF2,ABHD11,ACAA1,ACAA2,ACACB,ACAD11,ACADM,ACADS,ACADSB,ACOT7,ACOT9,ACOX2,ACSL1,ACSL4,ACSL5,ACSM2A,ACSM3,ACSM5,ACTBL2,ACTL6A,ACTR2,ADAR,ADD3,ADGRE5,ADH1B,ADH1C,ADH6,ADRM1,ADSS,AEBP1,AES,AFMID,AGA,AGL,AGPS,AGR2,AGR3,AGRN,AGXT2,AHCYL1,AHNAK,AHNAK2,AHSA1,AIMP1,AKAP2,AKR1B10,ALDH1B1,ALDH1L1,ALDH2,ALDH8A1,ALDOA,ALYREF,AMDHD2,AMT,ANAPC1,ANLN,ANP32A,ANP32B,ANP32E,ANXA2,ANXA4,ANXA5…	957
Cancer,Organismal Injury and Abnormalities	Tumorigenesis of tissue	1.27e-48		0.289	AADAT,AASS,ABAT,ABCD1,ABCF2,ABHD11,ACAA1,ACAA2,ACACB,ACAD11,ACADM,ACADS,ACADSB,ACOT7,ACOT9,ACOX2,ACSL1,ACSL4,ACSL5,ACSM2A,ACSM3,ACSM5,ACTBL2,ACTR2,ADAR,ADD3,ADGRE5,ADH1B,ADH1C,ADH6,ADRM1,ADSS,AEBP1,AES,AFMID,AGA,AGL,AGPS,AGR2,AGR3,AGRN,AGXT2,AHCYL1,AHNAK,AHNAK2,AHSA1,AIMP1,AKAP2,AKR1B10,ALDH1B1,ALDH1L1,ALDH2,ALDH8A1,ALDOA,ALYREF,AMDHD2,AMT,ANAPC1,ANLN,ANP32A,ANP32B,ANP32E,ANXA2,ANXA4,ANXA5,AP1M1,…	952
Cancer,Organismal Injury and Abnormalities	Epithelial neoplasm	2.7e-47		0.394	AADAT,AASS,ABAT,ABCD1,ABCF2,ABHD11,ACAA1,ACAA2,ACACB,ACAD11,ACADM,ACADS,ACADSB,ACOT7,ACOT9,ACOX2,ACSL1,ACSL4,ACSL5,ACSM2A,ACSM3,ACSM5,ACTBL2,ACTR2,ADAR,ADD3,ADGRE5,ADH1B,ADH1C,ADH6,ADRM1,ADSS,AEBP1,AES,AFMID,AGA,AGL,AGPS,AGR2,AGRN,AGXT2,AHCYL1,AHNAK,AHNAK2,AHSA1,AIMP1,AKAP2,AKR1B10,ALDH1B1,ALDH1L1,ALDH2,ALDH8A1,ALDOA,ALYREF,AMDHD2,AMT,ANAPC1,ANLN,ANP32A,ANP32B,ANP32E,ANXA2,ANXA4,ANXA5,AP1M1,AP3D1…	948
Cancer,Organismal Injury and Abnormalities	Non-melanoma solid tumor	2.32e-46		1.032	AADAT,AASS,ABAT,ABCD1,ABCF2,ABHD11,ACAA1,ACAA2,ACACB,ACAD11,ACADM,ACADS,ACADSB,ACOT7,ACOT9,ACOX2,ACSL1,ACSL4,ACSL5,ACSM2A,ACSM3,ACSM5,ACTBL2,ACTR2,ADAR,ADD3,ADGRE5,ADH1B,ADH1C,ADH6,ADRM1,ADSS,AEBP1,AES,AFMID,AGA,AGL,AGPS,AGR2,AGR3,AGRN,AGXT2,AHCYL1,AHNAK,AHNAK2,AHSA1,AIMP1,AKAP2,AKR1B10,ALDH1B1,ALDH1L1,ALDH2,ALDH8A1,ALDOA,ALYREF,AMDHD2,AMT,ANAPC1,ANLN,ANP32A,ANP32B,ANP32E,ANXA2,ANXA4,ANXA5,AP1M1,…	951
Cancer,Organismal Injury and Abnormalities	Carcinoma	5.99e-46		0.645	AADAT,AASS,ABAT,ABCD1,ABCF2,ABHD11,ACAA1,ACAA2,ACACB,ACAD11,ACADM,ACADS,ACADSB,ACOT7,ACOT9,ACOX2,ACSL1,ACSL4,ACSL5,ACSM2A,ACSM3,ACSM5,ACTBL2,ACTR2,ADAR,ADD3,ADGRE5,ADH1B,ADH1C,ADH6,ADRM1,ADSS,AEBP1,AES,AFMID,AGA,AGL,AGPS,AGR2,AGRN,AGXT2,AHCYL1,AHNAK,AHNAK2,AHSA1,AIMP1,AKAP2,AKR1B10,ALDH1B1,ALDH1L1,ALDH2,ALDH8A1,ALDOA,ALYREF,AMDHD2,AMT,ANAPC1,ANLN,ANP32A,ANP32B,ANP32E,ANXA2,ANXA4,ANXA5,AP1M1,AP3D1…	945
Cancer,Organismal Injury and Abnormalities	Cancer	3.54e-44		-0.011	AADAT,AASS,ABAT,ABCD1,ABCF2,ABHD11,ACAA1,ACAA2,ACACB,ACAD11,ACADM,ACADS,ACADSB,ACOT7,ACOT9,ACOX2,ACSL1,ACSL4,ACSL5,ACSM2A,ACSM3,ACSM5,ACTBL2,ACTL6A,ACTR2,ADAR,ADD3,ADGRE5,ADH1B,ADH1C,ADH6,ADRM1,ADSS,AEBP1,AES,AFMID,AGA,AGL,AGPS,AGR2,AGR3,AGRN,AGXT2,AHCYL1,AHNAK,AHNAK2,AHSA1,AIMP1,AKAP2,AKR1B10,ALDH1B1,ALDH1L1,ALDH2,ALDH8A1,ALDOA,ALYREF,AMDHD2,AMT,ANAPC1,ANLN,ANP32A,ANP32B,ANP32E,ANXA2,ANXA4,ANXA5…	966
Cancer,Organismal Injury and Abnormalities	Extracranial solid tumor	4.48e-43		-0.311	AADAT,AASS,ABAT,ABCD1,ABCF2,ABHD11,ACAA1,ACAA2,ACACB,ACAD11,ACADM,ACADS,ACADSB,ACOT7,ACOT9,ACOX2,ACSL1,ACSL4,ACSL5,ACSM2A,ACSM3,ACSM5,ACTBL2,ACTR2,ADAR,ADD3,ADGRE5,ADH1B,ADH1C,ADH6,ADRM1,ADSS,AEBP1,AES,AFMID,AGA,AGL,AGPS,AGR2,AGR3,AGRN,AGXT2,AHCYL1,AHNAK,AHNAK2,AHSA1,AIMP1,AKAP2,AKR1B10,ALDH1B1,ALDH1L1,ALDH2,ALDH8A1,ALDOA,ALYREF,AMDHD2,AMT,ANAPC1,ANLN,ANP32A,ANP32B,ANP32E,ANXA2,ANXA4,ANXA5,AP1M1,…	961
Cancer,Organismal Injury and Abnormalities	Malignant solid tumor	8.29e-43		-0.161	AADAT,AASS,ABAT,ABCD1,ABCF2,ABHD11,ACAA1,ACAA2,ACACB,ACAD11,ACADM,ACADS,ACADSB,ACOT7,ACOT9,ACOX2,ACSL1,ACSL4,ACSL5,ACSM2A,ACSM3,ACSM5,ACTBL2,ACTL6A,ACTR2,ADAR,ADD3,ADGRE5,ADH1B,ADH1C,ADH6,ADRM1,ADSS,AEBP1,AES,AFMID,AGA,AGL,AGPS,AGR2,AGR3,AGRN,AGXT2,AHCYL1,AHNAK,AHNAK2,AHSA1,AIMP1,AKAP2,AKR1B10,ALDH1B1,ALDH1L1,ALDH2,ALDH8A1,ALDOA,ALYREF,AMDHD2,AMT,ANAPC1,ANLN,ANP32A,ANP32B,ANP32E,ANXA2,ANXA4,ANXA5…	961
Cancer,Organismal Injury and Abnormalities	Solid tumor	2.07e-42		0.52	AADAT,AASS,ABAT,ABCD1,ABCF2,ABHD11,ACAA1,ACAA2,ACACB,ACAD11,ACADM,ACADS,ACADSB,ACOT7,ACOT9,ACOX2,ACSL1,ACSL4,ACSL5,ACSM2A,ACSM3,ACSM5,ACTBL2,ACTL6A,ACTR2,ADAR,ADD3,ADGRE5,ADH1B,ADH1C,ADH6,ADRM1,ADSS,AEBP1,AES,AFMID,AGA,AGL,AGPS,AGR2,AGR3,AGRN,AGXT2,AHCYL1,AHNAK,AHNAK2,AHSA1,AIMP1,AKAP2,AKR1B10,ALDH1B1,ALDH1L1,ALDH2,ALDH8A1,ALDOA,ALYREF,AMDHD2,AMT,ANAPC1,ANLN,ANP32A,ANP32B,ANP32E,ANXA2,ANXA4,ANXA5…	964
Cancer,Organismal Injury and Abnormalities	Head and neck tumor	7.16e-40		-1.389	AADAT,ABAT,ABCD1,ABCF2,ABHD11,ACAA1,ACAA2,ACACB,ACAD11,ACADM,ACADS,ACADSB,ACOT7,ACOT9,ACOX2,ACSL1,ACSL4,ACSL5,ACSM3,ACSM5,ACTR2,ADAR,ADD3,ADH1B,ADRM1,ADSS,AEBP1,AES,AFMID,AGA,AGL,AGPS,AGR2,AGRN,AGXT2,AHCYL1,AHNAK,AHNAK2,AIMP1,AKAP2,ALDH1L1,ALDH2,ALYREF,AMDHD2,AMT,ANAPC1,ANLN,ANP32A,ANP32B,ANXA2,ANXA5,AP1M1,AP3D1,APIP,APOA1,APOE,ARAP1,ARF5,ARHGAP10,ARHGAP17,ARHGEF16,ARL8B,ARMC8,ASNA1,ASPDH,ASPG,AS…	813
Cancer,Organismal Injury and Abnormalities	Cancer of secretory structure	3.43e-39		0.179	AADAT,ABAT,ABCD1,ABCF2,ABHD11,ACAA1,ACAA2,ACACB,ACAD11,ACADM,ACADS,ACADSB,ACOT7,ACOT9,ACOX2,ACSL1,ACSL4,ACSL5,ACSM3,ACSM5,ACTBL2,ACTR2,ADAR,ADD3,ADH1B,ADRM1,ADSS,AEBP1,AES,AFMID,AGA,AGL,AGPS,AGR2,AGRN,AGXT2,AHCYL1,AHNAK,AHNAK2,AIMP1,AKAP2,ALDH1L1,ALDH2,ALDOA,ALYREF,AMDHD2,AMT,ANAPC1,ANLN,ANP32A,ANP32B,ANP32E,ANXA2,ANXA5,AP1M1,AP3D1,API5,APIP,APOA1,APOE,ARAP1,ARF5,ARHGAP10,ARHGAP17,ARHGEF16,ARL8B,…	833
Cancer,Endocrine System Disorders,Organismal Injury and Abnormalities	Endocrine gland tumor	3.58e-39		-1.268	AADAT,ABAT,ABCD1,ABCF2,ABHD11,ACAA1,ACAA2,ACACB,ACAD11,ACADM,ACADS,ACADSB,ACOT7,ACOT9,ACOX2,ACSL1,ACSL4,ACSL5,ACSM3,ACSM5,ACTR2,ADAR,ADD3,ADH1B,ADRM1,ADSS,AEBP1,AES,AFMID,AGA,AGL,AGPS,AGR2,AGRN,AGXT2,AHCYL1,AHNAK,AHNAK2,AIMP1,AKAP2,ALDH1L1,ALDH2,ALYREF,AMDHD2,AMT,ANAPC1,ANLN,ANP32B,ANXA2,ANXA5,AP1M1,AP3D1,APIP,APOA1,APOE,ARAP1,ARF5,ARHGAP10,ARHGAP17,ARHGEF16,ARL8B,ARMC8,ASNA1,ASPDH,ASPG,ASPN,ASS1…	783
Cancer,Organismal Injury and Abnormalities	Head and neck cancer	4.35e-39	Decreased	-2.2	AADAT,ABAT,ABCD1,ABCF2,ABHD11,ACAA1,ACAA2,ACACB,ACAD11,ACADM,ACADS,ACADSB,ACOT7,ACOT9,ACOX2,ACSL1,ACSL4,ACSL5,ACSM3,ACSM5,ACTR2,ADAR,ADD3,ADH1B,ADRM1,ADSS,AEBP1,AES,AFMID,AGA,AGL,AGPS,AGR2,AGRN,AGXT2,AHCYL1,AHNAK,AHNAK2,AIMP1,AKAP2,ALDH1L1,ALDH2,ALYREF,AMDHD2,AMT,ANAPC1,ANLN,ANP32A,ANP32B,ANXA2,ANXA5,AP1M1,AP3D1,APIP,APOE,ARAP1,ARF5,ARHGAP10,ARHGAP17,ARHGEF16,ARL8B,ARMC8,ASNA1,ASPDH,ASPG,ASPN,ASS…	805
Cancer,Organismal Injury and Abnormalities	Neck neoplasm	7.14e-39			AADAT,ABAT,ABCD1,ABCF2,ABHD11,ACAA1,ACAA2,ACACB,ACAD11,ACADM,ACADS,ACADSB,ACOT7,ACOT9,ACOX2,ACSL1,ACSL4,ACSL5,ACSM3,ACSM5,ACTR2,ADAR,ADD3,ADH1B,ADRM1,ADSS,AEBP1,AES,AFMID,AGA,AGL,AGPS,AGR2,AGRN,AGXT2,AHCYL1,AHNAK,AHNAK2,AIMP1,AKAP2,ALDH1L1,ALDH2,ALYREF,AMDHD2,AMT,ANAPC1,ANLN,ANP32B,ANXA2,ANXA5,AP1M1,AP3D1,APIP,APOA1,APOE,ARAP1,ARF5,ARHGAP10,ARHGAP17,ARHGEF16,ARL8B,ARMC8,ASNA1,ASPDH,ASPG,ASPN,ASS1…	780
Cancer,Organismal Injury and Abnormalities	Head and neck carcinoma	9.78e-39			AADAT,ABAT,ABCD1,ABCF2,ABHD11,ACAA1,ACAA2,ACACB,ACAD11,ACADM,ACADS,ACADSB,ACOT7,ACOT9,ACOX2,ACSL1,ACSL4,ACSL5,ACSM3,ACSM5,ACTR2,ADAR,ADD3,ADH1B,ADRM1,ADSS,AEBP1,AES,AFMID,AGA,AGL,AGPS,AGR2,AGRN,AGXT2,AHCYL1,AHNAK,AHNAK2,AIMP1,AKAP2,ALDH1L1,ALDH2,ALYREF,AMDHD2,AMT,ANAPC1,ANLN,ANP32A,ANP32B,ANXA2,ANXA5,AP1M1,AP3D1,APIP,APOE,ARAP1,ARF5,ARHGAP10,ARHGAP17,ARHGEF16,ARL8B,ARMC8,ASNA1,ASPDH,ASPG,ASPN,ASS…	801
Cancer,Endocrine System Disorders,Organismal Injury and Abnormalities	Nonpituitary endocrine tumor	2.78e-38		-0.979	AADAT,ABAT,ABCD1,ABCF2,ABHD11,ACAA1,ACAA2,ACACB,ACAD11,ACADM,ACADS,ACADSB,ACOT7,ACOT9,ACOX2,ACSL1,ACSL4,ACSL5,ACSM3,ACSM5,ACTR2,ADAR,ADD3,ADH1B,ADRM1,ADSS,AEBP1,AES,AFMID,AGA,AGL,AGPS,AGR2,AGRN,AGXT2,AHCYL1,AHNAK,AHNAK2,AIMP1,AKAP2,ALDH1L1,ALDH2,ALYREF,AMDHD2,AMT,ANAPC1,ANLN,ANP32B,ANXA2,ANXA5,AP1M1,AP3D1,APIP,APOA1,APOE,ARAP1,ARF5,ARHGAP10,ARHGAP17,ARHGEF16,ARL8B,ARMC8,ASNA1,ASPDH,ASPG,ASPN,ASS1…	778
Cancer,Endocrine System Disorders,Organismal Injury and Abnormalities	Thyroid gland tumor	3.1e-38			AADAT,ABAT,ABCD1,ABCF2,ABHD11,ACAA1,ACAA2,ACACB,ACAD11,ACADM,ACADS,ACADSB,ACOT7,ACOT9,ACOX2,ACSL1,ACSL4,ACSL5,ACSM3,ACSM5,ACTR2,ADAR,ADD3,ADH1B,ADRM1,ADSS,AEBP1,AES,AFMID,AGA,AGL,AGPS,AGR2,AGRN,AGXT2,AHCYL1,AHNAK,AHNAK2,AIMP1,AKAP2,ALDH1L1,ALDH2,ALYREF,AMDHD2,AMT,ANAPC1,ANLN,ANP32B,ANXA2,ANXA5,AP1M1,AP3D1,APIP,APOA1,APOE,ARAP1,ARF5,ARHGAP10,ARHGAP17,ARHGEF16,ARL8B,ARMC8,ASNA1,ASPDH,ASPG,ASPN,ASS1…	773
Cancer,Endocrine System Disorders,Organismal Injury and Abnormalities	Endocrine carcinoma	1.64e-37			AADAT,ABAT,ABCD1,ABCF2,ABHD11,ACAA1,ACAA2,ACACB,ACAD11,ACADM,ACADS,ACADSB,ACOT7,ACOT9,ACOX2,ACSL1,ACSL4,ACSL5,ACSM3,ACSM5,ACTR2,ADAR,ADD3,ADH1B,ADRM1,ADSS,AEBP1,AES,AFMID,AGA,AGL,AGPS,AGR2,AGRN,AGXT2,AHCYL1,AHNAK,AHNAK2,AIMP1,AKAP2,ALDH1L1,ALDH2,ALYREF,AMDHD2,AMT,ANAPC1,ANLN,ANP32B,ANXA2,ANXA5,AP1M1,AP3D1,APIP,APOE,ARAP1,ARF5,ARHGAP10,ARHGAP17,ARHGEF16,ARL8B,ARMC8,ASNA1,ASPDH,ASPG,ASPN,ASS1,ATG16…	771
Cancer,Endocrine System Disorders,Organismal Injury and Abnormalities	Thyroid carcinoma	1.92e-37			AADAT,ABAT,ABCD1,ABCF2,ABHD11,ACAA1,ACAA2,ACACB,ACAD11,ACADM,ACADS,ACADSB,ACOT7,ACOT9,ACOX2,ACSL1,ACSL4,ACSL5,ACSM3,ACSM5,ACTR2,ADAR,ADD3,ADH1B,ADRM1,ADSS,AEBP1,AES,AFMID,AGA,AGL,AGPS,AGR2,AGRN,AGXT2,AHCYL1,AHNAK,AHNAK2,AIMP1,AKAP2,ALDH1L1,ALDH2,ALYREF,AMDHD2,AMT,ANAPC1,ANLN,ANP32B,ANXA2,ANXA5,AP1M1,AP3D1,APIP,APOE,ARAP1,ARF5,ARHGAP10,ARHGAP17,ARHGEF16,ARL8B,ARMC8,ASNA1,ASPDH,ASPG,ASPN,ASS1,ATG16…	769
Cancer,Organismal Injury and Abnormalities	Abdominal neoplasm	4.66e-32		-0.608	AADAT,AASS,ABAT,ABCD1,ABCF2,ABHD11,ACAA1,ACAA2,ACACB,ACAD11,ACADM,ACADS,ACADSB,ACOT7,ACOT9,ACOX2,ACSL1,ACSL4,ACSL5,ACSM2A,ACSM3,ACSM5,ACTBL2,ACTR2,ADAR,ADD3,ADGRE5,ADH1B,ADH1C,ADH6,ADRM1,AEBP1,AFMID,AGA,AGL,AGPS,AGR2,AGR3,AGRN,AGXT2,AHCYL1,AHNAK,AHNAK2,AHSA1,AIMP1,AKAP2,AKR1B10,ALDH1B1,ALDH1L1,ALDH2,ALDH8A1,ALDOA,ALYREF,AMT,ANAPC1,ANLN,ANP32A,ANP32B,ANP32E,ANXA2,ANXA4,ANXA5,AP1M1,AP3D1,API5,APIP,…	892
RNA Post-Transcriptional Modification	Splicing of mRNA	1.81e-31	Decreased	-2.188	ALYREF,CDC5L,CPSF7,CTNNBL1,DDX17,DDX39A,DHX9,EFTUD2,FUS,HNRNPA0,HNRNPA1,HNRNPA2B1,HNRNPA3,HNRNPC,HNRNPD,HNRNPH1,HNRNPH2,HNRNPK,HNRNPM,HNRNPR,HNRNPU,HNRNPUL1,KHDRBS1,MECP2,NCBP1,NPM1,PABPN1,PCBP1,PCBP4,PNN,POLR2A,POLR2B,PPIL1,PRPF31,PRPF4,PRPF40A,PRPF6,PTBP1,PTBP3,PUF60,RBM25,RBM8A,RBMX,SAP18,SF3A1,SF3A3,SF3B2,SF3B4,SF3B6,SNRNP200,SNRPA1,SNRPD3,SNRPF,SRSF1,SRSF10,SRSF2,SRSF3,SRSF5,SRSF6,SRSF7,SRSF…	68
RNA Post-Transcriptional Modification	Splicing of RNA	2.17e-31		-1.318	AHNAK,ALYREF,CDC5L,CELF1,CPSF7,CTNNBL1,DDX17,DDX39A,DHX9,EFTUD2,EPB41,FUS,HNRNPA0,HNRNPA1,HNRNPA2B1,HNRNPA3,HNRNPC,HNRNPD,HNRNPH1,HNRNPH2,HNRNPK,HNRNPM,HNRNPR,HNRNPU,HNRNPUL1,KHDRBS1,KHSRP,MECP2,NCBP1,NPM1,PABPN1,PCBP1,PCBP4,PNN,POLR2A,POLR2B,PPIL1,PRPF31,PRPF4,PRPF40A,PRPF6,PTBP1,PTBP3,PUF60,RBM25,RBM8A,RBMX,SAP18,SF3A1,SF3A3,SF3B2,SF3B4,SF3B6,SNRNP200,SNRPA1,SNRPD3,SNRPF,SON,SRSF1,SRSF10,SRSF2,…	73
Cancer,Organismal Injury and Abnormalities	Abdominal cancer	4.35e-30		-0.559	AADAT,AASS,ABAT,ABCD1,ABCF2,ABHD11,ACAA1,ACAA2,ACACB,ACAD11,ACADM,ACADS,ACADSB,ACOT7,ACOT9,ACOX2,ACSL1,ACSL4,ACSL5,ACSM2A,ACSM3,ACSM5,ACTBL2,ACTR2,ADAR,ADD3,ADH1B,ADH1C,ADH6,ADRM1,AEBP1,AFMID,AGA,AGL,AGPS,AGR2,AGR3,AGRN,AGXT2,AHCYL1,AHNAK,AHNAK2,AHSA1,AIMP1,AKAP2,AKR1B10,ALDH1B1,ALDH1L1,ALDH2,ALDH8A1,ALDOA,AMT,ANAPC1,ANLN,ANP32A,ANP32B,ANP32E,ANXA2,ANXA4,ANXA5,AP1M1,AP3D1,API5,APIP,APOA1,APOA4,AP…	879
Infectious Diseases	Viral Infection	1.59e-29	Increased	5.585	AASS,ACACB,ACADSB,ACSL1,ACTR2,ADAR,ADGRE5,AES,AHCYL1,AIMP1,AMDHD2,ANXA2,ANXA5,AP1M1,AP3D1,APOA1,APOE,ARPC5,ATOX1,B2M,BAG6,BAX,BCLAF1,C2,C5,CAD,CASP3,CAT,CD58,CD63,CD74,CHMP4B,CLNS1A,CLTA,CNOT7,CNP,COG2,COL3A1,COL5A1,CROCC,CRP,CSNK2B,CTSS,DCLK1,DDX17,DEK,DHX9,DICER1,DIMT1,EIF2AK2,EIF2B5,EIF3H,ELANE,EPS8,EXOSC10,F10,F11R,F2,FGA,FLNA,FN1,FNTA,FUBP1,FXR1,G3BP2,GBF1,GCSH,GOSR2,GPD2,GPT,GRB2,GTF2I,GYG1…	229
Cancer,Gastrointestinal Disease,Organismal Injury and Abnormalities	Digestive organ tumor	6.76e-29		-0.371	AADAT,AASS,ABAT,ABCD1,ABCF2,ABHD11,ACAA1,ACAA2,ACACB,ACAD11,ACADS,ACADSB,ACOT7,ACOT9,ACOX2,ACSL1,ACSL4,ACSL5,ACSM2A,ACSM3,ACSM5,ACTBL2,ACTR2,ADAR,ADD3,ADH1B,ADH1C,ADH6,ADRM1,AEBP1,AFMID,AGA,AGL,AGPS,AGR2,AGR3,AGRN,AGXT2,AHCYL1,AHNAK,AHNAK2,AHSA1,AIMP1,AKAP2,AKR1B10,ALDH1B1,ALDH1L1,ALDH2,ALDH8A1,ALDOA,ALYREF,AMDHD2,AMT,ANAPC1,ANLN,ANP32A,ANP32B,ANP32E,ANXA2,ANXA4,ANXA5,AP1M1,AP3D1,API5,APIP,APOA1,…	851
Cell Death and Survival	Apoptosis	8.53e-29	Decreased	-3.827	ACSL1,ACSL4,ACSM5,ADAR,AES,AGA,AGRN,AHSA1,AIMP1,AKR1B10,ALDH1L1,ALDH2,ALDOA,ANP32A,ANXA2,ANXA4,ANXA5,API5,APIP,APOA1,APOE,ARG1,ARHGAP10,ARHGEF16,ASS1,ATG16L1,ATG3,ATOX1,AZU1,B2M,BAG2,BAG6,BAX,BCLAF1,BLVRA,BMX,BTBD18,BUB3,C5,C6,CAMK2D,CAPN2,CAPNS1,CAPRIN1,CASP3,CAT,CBX3,CCDC88B,CD2AP,CD59,CD74,CDC25C,CDC37,CELF1,CENPF,CFL1,CIAPIN1,CIRBP,CLPTM1L,CNN2,CNP,COL18A1,COL4A1,COL4A2,COL4A3,CORO1A,CRIP1,CR…	332
RNA Post-Transcriptional Modification	Processing of mRNA	1.8e-28		-1.657	AHCYL1,ALYREF,CDC5L,CELF1,CPSF7,CTNNBL1,DDX17,DDX39A,DHX9,EFTUD2,FUS,HNRNPA0,HNRNPA1,HNRNPA2B1,HNRNPA3,HNRNPC,HNRNPD,HNRNPH1,HNRNPH2,HNRNPK,HNRNPM,HNRNPR,HNRNPU,HNRNPUL1,KHDRBS1,MECP2,NCBP1,NPM1,PABPN1,PCBP1,PCBP4,PNN,POLR2A,POLR2B,PPIL1,PRPF31,PRPF4,PRPF40A,PRPF6,PTBP1,PTBP3,PUF60,RBM25,RBM8A,RBMX,SAFB,SAP18,SF3A1,SF3A3,SF3B2,SF3B4,SF3B6,SNRNP200,SNRPA1,SNRPD3,SNRPF,SON,SRSF1,SRSF10,SRSF2,SRSF3,…	72
Cell Death and Survival	Necrosis	5.09e-28	Decreased	-3.908	ACSL1,ACSL4,ACSM5,ADAR,ADRM1,AGA,AGR2,AGRN,AHSA1,AIMP1,AKR1B10,ALDH1L1,ALDH2,ALDOA,ANP32A,ANXA2,ANXA5,API5,APIP,APOA1,APOE,ARG1,ASS1,ATG16L1,ATG3,AZU1,B2M,BAG2,BAG6,BAX,BCKDK,BCLAF1,BMX,BUB3,C5,C7,CAMK2D,CAPN2,CAPNS1,CAPRIN1,CASP3,CAT,CBX3,CCDC88B,CD2AP,CD59,CD74,CDC25C,CDC37,CELF1,CENPF,CHMP4B,CIAPIN1,CLPTM1L,CNN2,CNP,COL18A1,COL4A1,COL4A2,COL4A3,COL6A1,CORO1A,CPB2,CRKL,CRP,CSK,CSPG4,CSTA,CTH,CT…	332
Cancer,Gastrointestinal Disease,Organismal Injury and Abnormalities	Digestive system cancer	7.45e-28		-0.142	AADAT,AASS,ABAT,ABCD1,ABCF2,ABHD11,ACAA1,ACAA2,ACACB,ACAD11,ACADS,ACADSB,ACOT7,ACOT9,ACOX2,ACSL1,ACSL4,ACSL5,ACSM2A,ACSM3,ACSM5,ACTBL2,ACTR2,ADAR,ADD3,ADH1B,ADH1C,ADH6,ADRM1,AEBP1,AFMID,AGA,AGL,AGPS,AGR2,AGR3,AGRN,AGXT2,AHCYL1,AHNAK,AHNAK2,AHSA1,AIMP1,AKAP2,AKR1B10,ALDH1B1,ALDH1L1,ALDH2,ALDH8A1,ALDOA,AMDHD2,AMT,ANAPC1,ANLN,ANP32A,ANP32B,ANP32E,ANXA2,ANXA4,ANXA5,AP1M1,AP3D1,API5,APIP,APOA1,APOA4,A…	836
RNA Post-Transcriptional Modification	Processing of RNA	8.58e-28		-0.202	AHCYL1,AHNAK,ALYREF,CDC5L,CELF1,CPSF7,CTNNBL1,DDX17,DDX39A,DHX9,DICER1,DIMT1,DKC1,EFTUD2,EPB41,EXOSC10,EXOSC9,FUS,HNRNPA0,HNRNPA1,HNRNPA2B1,HNRNPA3,HNRNPC,HNRNPD,HNRNPH1,HNRNPH2,HNRNPK,HNRNPM,HNRNPR,HNRNPU,HNRNPUL1,KHDRBS1,KHSRP,KRR1,MECP2,NCBP1,NOP56,NOP58,NPM1,PABPN1,PCBP1,PCBP4,PES1,PNN,POLR2A,POLR2B,PPIL1,PRPF31,PRPF4,PRPF40A,PRPF6,PTBP1,PTBP3,PUF60,RBM25,RBM3,RBM39,RBM8A,RBMX,RPS27,SAFB,SAP1…	89
Cancer,Organismal Injury and Abnormalities	Abdominal carcinoma	6.78e-27		1.13	AADAT,AASS,ABAT,ABCD1,ABCF2,ABHD11,ACAA1,ACAA2,ACACB,ACAD11,ACADM,ACADS,ACADSB,ACOT7,ACOT9,ACOX2,ACSL1,ACSL4,ACSM2A,ACSM3,ACSM5,ACTBL2,ACTR2,ADAR,ADD3,ADH1B,ADH1C,ADH6,ADRM1,AEBP1,AFMID,AGA,AGL,AGPS,AGR2,AGRN,AGXT2,AHCYL1,AHNAK,AHNAK2,AHSA1,AKAP2,AKR1B10,ALDH1B1,ALDH1L1,ALDH2,ALDH8A1,ALDOA,AMT,ANAPC1,ANLN,ANP32A,ANP32B,ANP32E,ANXA2,ANXA4,ANXA5,AP1M1,AP3D1,API5,APIP,APOA4,APOE,ARAP1,ARF5,ARG1,ARHG…	850
Cancer,Gastrointestinal Disease,Organismal Injury and Abnormalities	Gastrointestinal tumor	4.67e-23		-0.676	AADAT,AASS,ABCD1,ABCF2,ABHD11,ACAA1,ACAA2,ACACB,ACAD11,ACADS,ACADSB,ACOT7,ACOT9,ACOX2,ACSL4,ACSL5,ACSM2A,ACTBL2,ADAR,ADD3,ADH1B,ADH6,ADRM1,AEBP1,AFMID,AGA,AGL,AGPS,AGR2,AGR3,AGRN,AGXT2,AHCYL1,AHNAK,AHNAK2,AHSA1,AIMP1,AKAP2,AKR1B10,ALDH1B1,ALDH1L1,ALDH2,ALDH8A1,ALDOA,ALYREF,AMDHD2,AMT,ANAPC1,ANLN,ANXA2,ANXA4,ANXA5,AP1M1,AP3D1,API5,APIP,APOA4,APOE,ARAP1,ARF5,ARG1,ARHGAP10,ARHGAP17,ARHGEF16,ARMC8,AS…	771
Protein Synthesis	Metabolism of protein	1.52e-22	Increased	3.162	ADRM1,ANAPC1,APOA1,APOA4,APOE,AZU1,B2M,BAG2,BAG6,BUB3,C5,CAPN2,CAPNS1,CAPRIN1,CASP3,CAT,CDC37,CFL1,CHP1,CIRBP,CNOT7,COL4A3,CPB2,CPNE1,CRTAP,CSPG4,CSTA,CTSH,CTSS,CUL3,CUL4A,DHX9,DICER1,DKC1,DNAJC3,DNMT1,DPP3,ECPAS,EEF1G,EIF2A,EIF2AK2,EIF2B4,EIF2B5,EIF2S2,EIF2S3,EIF3H,EIF3J,EIF4B,EIF4G2,EIF4H,ELANE,F2,FGA,FGG,FLNA,FN1,FXR1,GBA,GSN,HDAC6,HEXB,HGS,HIP1,HIST1H1B,HNRNPD,HNRNPK,HSP90AB1,HSPB1,HSPB8,HSPG…	172
Inflammatory Response	Degranulation	2.31e-22		0.262	ACAA1,ACTR2,ADGRE5,AGA,AGL,ALDOA,ANXA2,ANXA5,AP1M1,APOA1,ARG1,ARMC8,ARPC5,AZU1,B2M,BAG6,BST1,C5,CAT,CD58,CD59,CD63,CDC37L1,CNN2,COMMD3,CORO1A,CPNE1,CSK,CSNK2B,CTSH,CTSS,DBNL,DICER1,DNAJC3,DOCK2,ECM1,ELANE,EPX,EXOC2,F2,FABP5,FAF2,FAM3C,FAM49B,FCN1,FGA,FGB,FGG,FLG2,FLNA,FN1,GCA,GMFG,GSDMD,GSN,GYG1,HEXB,HMGB1,HSD11B1,HSP90AB1,ILF2,ITGAL,ITGAM,ITGAV,LAMTOR3,LCN2,LTF,MAN2B1,MANF,MAPK1,MAPK14,MAPK3,MMP…	105
Cancer,Organismal Injury and Abnormalities	Adenocarcinoma	2.55e-22		-0.922	AADAT,AASS,ABAT,ABCD1,ABCF2,ABHD11,ACAA1,ACAA2,ACACB,ACAD11,ACADM,ACADS,ACADSB,ACOT7,ACOT9,ACOX2,ACSL1,ACSL4,ACSM2A,ACSM3,ACSM5,ACTBL2,ACTR2,ADAR,ADD3,ADH1B,ADH1C,ADH6,ADRM1,AEBP1,AFMID,AGA,AGL,AGPS,AGR2,AGRN,AGXT2,AHCYL1,AHNAK,AHNAK2,AHSA1,AKAP2,AKR1B10,ALDH1B1,ALDH1L1,ALDH2,ALDH8A1,ALDOA,AMT,ANAPC1,ANLN,ANP32A,ANP32B,ANP32E,ANXA2,ANXA4,ANXA5,AP1M1,AP3D1,API5,APIP,APOA4,APOE,ARAP1,ARF5,ARG1,ARHG…	812
Cancer,Gastrointestinal Disease,Organismal Injury and Abnormalities	Gastrointestinal tract cancer	2.58e-22		-0.391	AADAT,AASS,ABCD1,ABCF2,ABHD11,ACAA1,ACAA2,ACACB,ACAD11,ACADS,ACADSB,ACOT7,ACOT9,ACOX2,ACSL4,ACSL5,ACSM2A,ACTBL2,ADAR,ADD3,ADH1B,ADH6,ADRM1,AEBP1,AFMID,AGA,AGL,AGPS,AGR2,AGR3,AGRN,AGXT2,AHCYL1,AHNAK,AHNAK2,AHSA1,AIMP1,AKAP2,AKR1B10,ALDH1B1,ALDH1L1,ALDH2,ALDH8A1,ALDOA,AMDHD2,AMT,ANAPC1,ANLN,ANXA2,ANXA4,ANXA5,AP1M1,AP3D1,API5,APIP,APOA4,APOE,ARAP1,ARF5,ARG1,ARHGAP10,ARHGAP17,ARHGEF16,ARMC8,ASPG,ASPN…	766
Cellular Compromise,Inflammatory Response	Degranulation of cells	4.44e-22		0.116	ACAA1,ACTR2,ADGRE5,AGA,AGL,ALDOA,ANXA2,ANXA5,AP1M1,APOA1,ARG1,ARMC8,ARPC5,AZU1,B2M,BAG6,BST1,C5,CAT,CD58,CD59,CD63,CDC37L1,CNN2,COMMD3,CORO1A,CPNE1,CSK,CSNK2B,CTSH,CTSS,DBNL,DICER1,DNAJC3,DOCK2,ECM1,ELANE,EPX,EXOC2,F2,FABP5,FAF2,FAM3C,FAM49B,FCN1,FGA,FGB,FGG,FLG2,FLNA,FN1,GCA,GMFG,GSDMD,GSN,GYG1,HEXB,HMGB1,HSD11B1,HSP90AB1,ILF2,ITGAL,ITGAM,ITGAV,LAMTOR3,LCN2,LTF,MAN2B1,MANF,MAPK1,MAPK14,MAPK3,MMP…	104
Cancer,Organismal Injury and Abnormalities	Genitourinary tumor	7.9e-22		-0.307	AADAT,AASS,ABAT,ABCD1,ABCF2,ABHD11,ACAA1,ACACB,ACAD11,ACADM,ACADS,ACADSB,ACOT7,ACOT9,ACOX2,ACSL1,ACSL4,ACSM3,ACTR2,ADAR,ADD3,ADGRE5,ADH1B,ADRM1,AEBP1,AGL,AGPS,AGR2,AGR3,AGXT2,AHCYL1,AHNAK,AHNAK2,AKAP2,ALDH1B1,ALDH1L1,ALDH2,ALDH8A1,ALDOA,ALYREF,AMT,ANAPC1,ANLN,ANP32B,ANP32E,ANXA2,ANXA5,AP3D1,API5,APIP,APOA1,APOA4,APOE,ARF5,ARHGAP10,ASNA1,ASPG,ASPN,ASS1,ATG16L1,ATXN2L,AUH,B2M,BAG6,BAX,BCAM,BCAT1,BC…	657
Cancer,Organismal Injury and Abnormalities	Abdominal adenocarcinoma	9.47e-22		-0.128	AADAT,AASS,ABCD1,ABCF2,ABHD11,ACAA1,ACAA2,ACACB,ACAD11,ACADM,ACADS,ACADSB,ACOT7,ACOT9,ACOX2,ACSL1,ACSL4,ACSM2A,ACSM3,ACSM5,ACTBL2,ACTR2,ADAR,ADD3,ADH1B,ADH1C,ADH6,ADRM1,AEBP1,AFMID,AGA,AGL,AGPS,AGR2,AGRN,AGXT2,AHCYL1,AHNAK,AHNAK2,AHSA1,AKAP2,AKR1B10,ALDH1B1,ALDH1L1,ALDH2,ALDH8A1,ALDOA,AMT,ANAPC1,ANLN,ANP32A,ANP32B,ANP32E,ANXA2,ANXA4,ANXA5,AP1M1,AP3D1,API5,APIP,APOA4,APOE,ARAP1,ARF5,ARG1,ARHGAP10,…	796
Cancer,Gastrointestinal Disease,Organismal Injury and Abnormalities	Large intestine neoplasm	4.83e-21		0.445	AADAT,AASS,ABCD1,ABCF2,ABHD11,ACAA1,ACAA2,ACACB,ACADS,ACADSB,ACOT7,ACOT9,ACOX2,ACSL4,ACSL5,ACSM2A,ACTBL2,ADAR,ADD3,ADH6,ADRM1,AEBP1,AFMID,AGA,AGL,AGPS,AGR2,AGR3,AGRN,AGXT2,AHCYL1,AHNAK,AHNAK2,AHSA1,AIMP1,AKAP2,AKR1B10,ALDH1B1,ALDH1L1,ALDH2,ALDH8A1,ALDOA,ALYREF,AMT,ANAPC1,ANLN,ANXA2,ANXA4,ANXA5,AP1M1,AP3D1,API5,APIP,APOA4,ARAP1,ARF5,ARG1,ARHGAP10,ARHGAP17,ARHGEF16,ARMC8,ASPG,ASPN,ASS1,ATG16L1,ATG3…	738
Amino Acid Metabolism,Small Molecule Biochemistry	Metabolism of amino acids	9.45e-21		-1.543	AADAT,AASS,ABAT,ACADSB,ADSS,AFMID,AGXT2,AMT,ARG1,ASPG,ASS1,AUH,BCAT1,BCKDHA,BCKDHB,BCKDK,BHMT,BHMT2,CAD,CPS1,CTH,DDAH2,FTCD,GCSH,GLDC,GLS,GLUD1,GLYAT,GLYATL1,GOT2,GPT,GSTZ1,HNF4A,HPD,ME2,MECP2,MSRA,MTHFD1,PAH,PFAS,PKM,PRODH2,PSPH,RHOC,SARDH,SHMT1,SMS,UPB1,VCAN	49
Cancer,Organismal Injury and Abnormalities	Malignant genitourinary solid tumor	1.18e-20		-0.353	AADAT,AASS,ABAT,ABCD1,ABCF2,ABHD11,ACAA1,ACACB,ACAD11,ACADM,ACADS,ACADSB,ACOT7,ACOT9,ACOX2,ACSL1,ACSL4,ACSM3,ACTR2,ADAR,ADD3,ADH1B,ADRM1,AEBP1,AGL,AGPS,AGR2,AGR3,AGXT2,AHCYL1,AHNAK,AHNAK2,AKAP2,ALDH1B1,ALDH1L1,ALDH2,ALDH8A1,ALDOA,AMT,ANAPC1,ANLN,ANP32B,ANP32E,ANXA2,ANXA5,AP3D1,API5,APIP,APOA1,APOA4,APOE,ARF5,ARHGAP10,ASNA1,ASPG,ASPN,ASS1,ATG16L1,ATXN2L,AUH,B2M,BAG6,BAX,BCAM,BCAT1,BCCIP,BCKDHA,BCK…	643
Cellular Compromise,Inflammatory Response	Degranulation of granulocytes	2.05e-20		0.713	ACAA1,ACTR2,ADGRE5,AGA,AGL,ALDOA,ANXA2,AP1M1,ARG1,ARMC8,ARPC5,AZU1,B2M,BST1,C5,CAT,CD58,CD59,CD63,CNN2,COMMD3,CPNE1,CSK,CSNK2B,CTSH,CTSS,DBNL,DNAJC3,DOCK2,ELANE,EPX,F2,FABP5,FAF2,FCN1,FLG2,GCA,GMFG,GSDMD,GSN,GYG1,HEXB,HMGB1,HSP90AB1,ILF2,ITGAL,ITGAM,ITGAV,LAMTOR3,LCN2,LTF,MAN2B1,MAPK1,MAPK14,MMP9,MNDA,MVP,NCSTN,NFKB1,NME2,PGM1,PKM,PRKCD,PTGES2,PYGL,RAB27A,RAB31,RHOG,S100A11,SDCBP,SERPINA1,SLC27A2…	76
Cancer,Gastrointestinal Disease,Organismal Injury and Abnormalities	Malignant neoplasm of large intestine	2.98e-20			AADAT,AASS,ABCD1,ABCF2,ABHD11,ACAA1,ACAA2,ACACB,ACADS,ACADSB,ACOT7,ACOT9,ACOX2,ACSL4,ACSL5,ACSM2A,ACTBL2,ADAR,ADD3,ADH6,ADRM1,AEBP1,AFMID,AGA,AGL,AGPS,AGR2,AGR3,AGRN,AGXT2,AHCYL1,AHNAK,AHNAK2,AHSA1,AIMP1,AKAP2,AKR1B10,ALDH1B1,ALDH1L1,ALDH2,ALDH8A1,ALDOA,AMT,ANAPC1,ANLN,ANXA2,ANXA4,ANXA5,AP1M1,AP3D1,API5,APIP,APOA4,ARAP1,ARF5,ARG1,ARHGAP10,ARHGAP17,ARHGEF16,ARMC8,ASPG,ASPN,ASS1,ATG16L1,ATG3,ATXN2L…	733
Cellular Compromise,Inflammatory Response	Degranulation of neutrophils	7e-20			ACAA1,ACTR2,ADGRE5,AGA,AGL,ALDOA,ANXA2,AP1M1,ARG1,ARMC8,ARPC5,AZU1,B2M,BST1,C5,CAT,CD58,CD59,CD63,CNN2,COMMD3,CPNE1,CSNK2B,CTSH,CTSS,DBNL,DNAJC3,DOCK2,ELANE,EPX,FABP5,FAF2,FCN1,FLG2,GCA,GMFG,GSDMD,GSN,GYG1,HEXB,HMGB1,HSP90AB1,ILF2,ITGAL,ITGAM,ITGAV,LAMTOR3,LCN2,LTF,MAN2B1,MAPK1,MAPK14,MMP9,MNDA,MVP,NCSTN,NFKB1,NME2,PGM1,PKM,PRKCD,PTGES2,PYGL,RAB27A,RAB31,RHOG,S100A11,SDCBP,SERPINA1,SLC27A2,SRP14,…	74
Infectious Diseases	Infection of cells	1.13e-19	Increased	5.344	AASS,ACACB,ACADSB,ACTR2,ADAR,ADGRE5,AES,AMDHD2,ANXA2,APOE,ARPC5,ATOX1,B2M,BAG6,BCLAF1,C2,CAD,CD58,CD74,CLNS1A,CLTA,CNOT7,COG2,COL5A1,CROCC,CTSS,DHX9,DIMT1,EIF2AK2,EIF2B5,EIF3H,ELANE,EPS8,EXOSC10,F10,F2,FN1,FNTA,FXR1,GBF1,GCSH,GOSR2,GPD2,HGS,HIP1,HMGB1,HNRNPH1,HNRNPK,HNRNPU,ICAM1,IFITM3,ILF3,ITGAM,ITSN2,KHDRBS1,LCN2,LTF,MAP4,MAPRE1,MBL2,MDN1,MGAT1,MMP9,MRC1,MRE11,MRPL44,MX1,NCKAP1,NFKB1,NIPSNAP2,N…	120
Cancer,Gastrointestinal Disease,Organismal Injury and Abnormalities	Gastrointestinal carcinoma	8.2e-19			AADAT,AASS,ABCD1,ABCF2,ABHD11,ACAA1,ACAA2,ACACB,ACAD11,ACADSB,ACOT7,ACOT9,ACOX2,ACSL4,ACSM2A,ACTBL2,ADAR,ADD3,ADH1B,ADH6,ADRM1,AEBP1,AFMID,AGA,AGL,AGPS,AGRN,AGXT2,AHCYL1,AHNAK,AHNAK2,AHSA1,AKAP2,AKR1B10,ALDH1B1,ALDH1L1,ALDH2,ALDH8A1,ALDOA,AMDHD2,AMT,ANAPC1,ANLN,ANXA4,AP1M1,AP3D1,API5,APIP,APOA4,APOE,ARAP1,ARF5,ARG1,ARHGAP10,ARHGAP17,ARHGEF16,ARMC8,ASPG,ASPN,ASS1,ATG16L1,ATG3,ATXN2L,AUP1,AZU1,B2M,…	729
Organismal Survival	Morbidity or mortality	9.69e-19	Decreased	-9.593	ACADM,ACTL6A,ADAR,ADGRE5,ADH1C,AEBP1,AES,AFMID,AGA,AGL,AGR2,AGRN,ALDOA,ANXA2,AP1M1,APOA1,APOE,ARF5,ARG1,ARL8B,ASNA1,ASS1,ATG16L1,ATG3,ATOX1,B2M,BAG6,BAX,BCLAF1,BCS1L,BMX,BUB3,BYSL,C5,CAP2,CAPN2,CAPNS1,CAPRIN1,CASK,CASP3,CD2AP,CD59,CD74,CELF1,CFL1,CFL2,CHD4,CIAPIN1,CKB,CLNS1A,CLPTM1L,CNN3,CNP,COL12A1,COL3A1,COL4A1,COL4A2,COL4A3,COL5A1,COL6A2,CPB2,CPS1,CRKL,CRP,CSK,CSNK2B,CSRP1,CTH,CTNNBL1,CTR9,CTT…	284
Cancer,Organismal Injury and Abnormalities	Breast or colorectal cancer	1.81e-18		0.218	AASS,ABAT,ABCF2,ACAA1,ACACB,ACADS,ACOT7,ACOT9,ACOX2,ACSL5,ADAR,ADD3,ADRM1,AEBP1,AGL,AGR2,AGR3,AGRN,AHNAK2,AIMP1,AKAP2,AKR1B10,ALDH1B1,ALDH1L1,ALDH2,ALDH8A1,ALDOA,ANAPC1,ANLN,ANP32B,ANXA2,ANXA4,ANXA5,AP3D1,API5,APIP,APOA1,APOA4,APOE,ARAP1,ARG1,ARHGAP10,ARHGEF16,ARMC8,ASPG,ASPN,ASS1,ATG16L1,ATG3,ATXN2L,B2M,BAG6,BAX,BCAM,BCAT1,BCCIP,BCKDK,BLVRA,BMX,BST1,BYSL,C2,C7,C8G,CACYBP,CAD,CAPG,CAPN2,CAPN5,CAP…	538
Cancer,Organismal Injury and Abnormalities	Tumorigenesis of epithelial neoplasm	7.62e-18		-0.836	AASS,ABCD1,ABCF2,ABHD11,ACACB,ACAD11,ACADM,ACADS,ACADSB,ACOT7,ACOT9,ACOX2,ACSL1,ACSL4,ACSM3,ACTR2,ADAR,ADD3,ADH1B,ADH1C,AEBP1,AGL,AGPS,AGRN,AGXT2,AHCYL1,AHNAK,AHNAK2,AKAP2,AKR1B10,ALDH1B1,ALDH1L1,ALDH2,ALDH8A1,ALDOA,AMT,ANAPC1,ANLN,ANP32A,ANP32B,ANP32E,ANXA2,ANXA4,ANXA5,AP3D1,API5,APIP,APOA1,APOA4,APOE,ARAP1,ARG1,ARHGAP10,ARHGEF16,ARMC8,ASPG,ASPN,ASS1,ATG16L1,ATG3,ATXN2L,AUH,B2M,BAG6,BAX,BCAM,BCA…	632
Organismal Survival	Organismal death	8.1e-18	Decreased	-9.906	ACADM,ACTL6A,ADAR,ADH1C,AEBP1,AES,AFMID,AGA,AGL,AGR2,AGRN,ALDOA,ANXA2,AP1M1,APOA1,APOE,ARF5,ARG1,ARL8B,ASNA1,ASS1,ATG16L1,ATG3,ATOX1,B2M,BAG6,BAX,BCLAF1,BCS1L,BMX,BUB3,BYSL,C5,CAP2,CAPN2,CAPNS1,CAPRIN1,CASK,CASP3,CD2AP,CD59,CD74,CELF1,CFL1,CFL2,CHD4,CIAPIN1,CKB,CLNS1A,CLPTM1L,CNN3,CNP,COL12A1,COL3A1,COL4A1,COL4A2,COL4A3,COL5A1,COL6A2,CPB2,CPS1,CRKL,CRP,CSK,CSNK2B,CSRP1,CTH,CTNNBL1,CTR9,CTTN,CUL3,…	278
Cancer,Organismal Injury and Abnormalities	Anogenital cancer	8.5e-18		0	AADAT,AASS,ABAT,ABCD1,ABCF2,ACAA1,ACACB,ACAD11,ACADM,ACADS,ACADSB,ACOT7,ACOT9,ACOX2,ACSL1,ACSL4,ACSM3,ACTR2,ADAR,ADD3,ADH1B,ADRM1,AEBP1,AGL,AGPS,AGR2,AGR3,AGXT2,AHCYL1,AHNAK,AHNAK2,AKAP2,ALDH1B1,ALDH1L1,ALDH2,ALDH8A1,ALDOA,AMT,ANAPC1,ANLN,ANP32B,ANP32E,ANXA2,ANXA5,AP3D1,API5,APIP,APOA1,APOA4,APOE,ARF5,ARHGAP10,ASNA1,ASPG,ASPN,ASS1,ATG16L1,ATXN2L,AUH,B2M,BAG6,BAX,BCAM,BCAT1,BCCIP,BCKDHA,BCKDK,BCLA…	595
Cancer,Gastrointestinal Disease,Organismal Injury and Abnormalities	Intestinal carcinoma	9e-18			AADAT,AASS,ABCD1,ABCF2,ABHD11,ACAA1,ACAA2,ACACB,ACADSB,ACOT7,ACOT9,ACOX2,ACSL4,ACSM2A,ACTBL2,ADAR,ADD3,ADH6,ADRM1,AEBP1,AFMID,AGA,AGL,AGPS,AGRN,AGXT2,AHCYL1,AHNAK,AHNAK2,AHSA1,AKAP2,AKR1B10,ALDH1B1,ALDH1L1,ALDH2,ALDH8A1,ALDOA,AMT,ANAPC1,ANLN,ANXA4,AP1M1,AP3D1,API5,APIP,APOA4,ARAP1,ARF5,ARG1,ARHGAP10,ARHGAP17,ARHGEF16,ARMC8,ASPG,ASPN,ASS1,ATG16L1,ATG3,ATXN2L,AUP1,AZU1,B2M,BAG6,BAX,BCAM,BCAT1,BCKDH…	696
Cancer,Organismal Injury and Abnormalities,Reproductive System Disease	Breast or gynecological cancer	1.35e-17		0	AASS,ABAT,ABCD1,ABCF2,ACAA1,ACACB,ACAD11,ACADM,ACADS,ACADSB,ACOT9,ACOX2,ACSL1,ACSL4,ACSM3,ACTR2,ADD3,ADH1B,ADRM1,AEBP1,AGL,AGPS,AGR2,AGR3,AGXT2,AHCYL1,AHNAK,AHNAK2,AKAP2,ALDH1B1,ALDH1L1,ALDH8A1,ALDOA,ANLN,ANP32B,ANP32E,ANXA2,ANXA5,AP3D1,APIP,APOA1,APOA4,APOE,ASPN,ATG16L1,AUH,B2M,BAG6,BAX,BCAM,BCAT1,BCCIP,BCLAF1,BDH1,BLVRA,BMX,BST1,C2,C5,C6,C7,C8B,CAD,CAP2,CAPN2,CAPN5,CASK,CASP3,CAT,CBX3,CBX8,CCDC…	487
Cancer,Gastrointestinal Disease,Organismal Injury and Abnormalities	Large intestine carcinoma	1.43e-17			AADAT,AASS,ABCD1,ABCF2,ABHD11,ACAA1,ACAA2,ACACB,ACADSB,ACOT7,ACOT9,ACOX2,ACSL4,ACSM2A,ACTBL2,ADAR,ADD3,ADH6,ADRM1,AEBP1,AFMID,AGA,AGL,AGPS,AGRN,AGXT2,AHCYL1,AHNAK,AHNAK2,AHSA1,AKAP2,AKR1B10,ALDH1B1,ALDH1L1,ALDH2,ALDH8A1,ALDOA,AMT,ANAPC1,ANLN,ANXA4,AP1M1,AP3D1,API5,APIP,APOA4,ARAP1,ARF5,ARG1,ARHGAP10,ARHGAP17,ARHGEF16,ARMC8,ASPG,ASPN,ASS1,ATG16L1,ATG3,ATXN2L,AUP1,AZU1,B2M,BAG6,BAX,BCAM,BCAT1,BCKDH…	695
Cancer,Organismal Injury and Abnormalities	Incidence of tumor	1.5e-17	Decreased	-2.13	AASS,ABAT,ABCD1,ABCF2,ABHD11,ACACB,ACAD11,ACADM,ACADS,ACADSB,ACOT7,ACOT9,ACOX2,ACSL1,ACSL4,ACSM3,ACTR2,ADAR,ADD3,ADGRE5,ADH1B,ADH1C,AEBP1,AGL,AGPS,AGRN,AGXT2,AHCYL1,AHNAK,AHNAK2,AKAP2,AKR1B10,ALDH1B1,ALDH1L1,ALDH2,ALDH8A1,ALDOA,ALYREF,AMT,ANAPC1,ANLN,ANP32A,ANP32B,ANP32E,ANXA2,ANXA4,ANXA5,AP3D1,API5,APIP,APOA1,APOA4,APOE,ARAP1,ARG1,ARHGAP10,ARHGEF16,ARMC8,ASPG,ASPN,ASS1,ATG16L1,ATG3,ATXN2L,AUH,B2…	654
Cellular Compromise,Inflammatory Response	Degranulation of phagocytes	2.16e-17		0.67	ACAA1,ACTR2,ADGRE5,AGA,AGL,ALDOA,ANXA2,AP1M1,ARG1,ARMC8,ARPC5,AZU1,B2M,BST1,C5,CAT,CD58,CD59,CD63,CNN2,COMMD3,CORO1A,CPNE1,CSNK2B,CTSH,CTSS,DBNL,DNAJC3,DOCK2,ELANE,EPX,F2,FABP5,FAF2,FCN1,FLG2,GCA,GMFG,GSDMD,GSN,GYG1,HEXB,HMGB1,HSD11B1,HSP90AB1,ILF2,ITGAL,ITGAM,ITGAV,LAMTOR3,LCN2,LTF,MAN2B1,MAPK1,MAPK14,MAPK3,MMP9,MNDA,MVP,NCSTN,NFKB1,NME2,PAK2,PGM1,PKM,PRKCD,PTGES2,PYGL,RAB27A,RAB31,RHOG,S100A11,…	81
Cancer,Organismal Injury and Abnormalities	Frequency of tumor	3.47e-17	Decreased	-2.088	AASS,ABAT,ABCD1,ABCF2,ABHD11,ACACB,ACAD11,ACADM,ACADS,ACADSB,ACOT7,ACOT9,ACOX2,ACSL1,ACSL4,ACSM3,ACTR2,ADAR,ADD3,ADH1B,ADH1C,AEBP1,AGL,AGPS,AGRN,AGXT2,AHCYL1,AHNAK,AHNAK2,AKAP2,AKR1B10,ALDH1B1,ALDH1L1,ALDH2,ALDH8A1,ALDOA,AMT,ANAPC1,ANLN,ANP32A,ANP32B,ANP32E,ANXA2,ANXA4,ANXA5,AP3D1,API5,APIP,APOA1,APOA4,APOE,ARAP1,ARG1,ARHGAP10,ARHGEF16,ARMC8,ASPG,ASPN,ASS1,ATG16L1,ATG3,ATXN2L,AUH,B2M,BAG6,BAX,BCA…	637
Cancer,Organismal Injury and Abnormalities	Development of carcinoma	2.47e-16		-0.898	AASS,ABCD1,ABCF2,ABHD11,ACACB,ACAD11,ACADM,ACADS,ACADSB,ACOT7,ACOT9,ACOX2,ACSL1,ACSL4,ACSM3,ACTR2,ADAR,ADD3,ADH1B,ADH1C,AEBP1,AGL,AGPS,AGRN,AGXT2,AHCYL1,AHNAK,AHNAK2,AKAP2,AKR1B10,ALDH1B1,ALDH1L1,ALDH2,ALDH8A1,ALDOA,AMT,ANAPC1,ANLN,ANP32A,ANP32B,ANP32E,ANXA2,ANXA4,ANXA5,AP3D1,API5,APIP,APOA4,APOE,ARAP1,ARHGAP10,ARHGEF16,ARMC8,ASPG,ASPN,ASS1,ATG16L1,ATG3,ATXN2L,AUH,B2M,BAG6,BAX,BCAM,BCAT1,BCCIP,BC…	619
Protein Synthesis	Synthesis of protein	3.35e-16	Increased	2.53	CAPRIN1,CASP3,CIRBP,CNOT7,COL4A3,DHX9,DICER1,DKC1,DNMT1,EEF1G,EIF2A,EIF2AK2,EIF2B4,EIF2B5,EIF2S2,EIF2S3,EIF3H,EIF3J,EIF4B,EIF4G2,EIF4H,FN1,FXR1,GSN,HDAC6,HNRNPD,HNRNPK,HSPB1,HSPB8,ICAM1,ILF3,ITGA2,KHDRBS1,KRR1,MAP2K3,MAPK1,MAPK3,MRPL11,MRPL12,MRPL13,MRPL14,MRPL16,MRPL18,MRPL19,MRPL21,MRPL37,MRPL41,MRPL44,MRPL53,MRPS17,MRPS2,MRPS22,MRPS27,MRPS28,MRPS5,MRPS9,MVK,MYBBP1A,NCBP1,NCL,NDRG2,NFKB1,NPC1,N…	88
Cellular Development,Cellular Growth and Proliferation	Cell proliferation of tumor cell lines	3.67e-16	Increased	5.526	ACSL4,ACSL5,AGA,AHNAK,AHSA1,AKR1B10,ALDH1L1,ALDOA,ANXA2,API5,APIP,ARG1,ASS1,BAX,BCCIP,BMX,BUB3,CACYBP,CAMK2D,CASP3,CAT,CD59,CD74,CDC37,CHD4,CIRBP,CNN1,CNN2,COL18A1,COL4A2,COL4A3,COL6A3,COPS4,COPS6,CRKL,CSNK2B,CSPG4,CTR9,CTTN,CUL4A,DCLK1,DDX17,DEK,DSC2,EFEMP1,EIF3H,EIF4B,EIF4H,ELANE,EPS8,ERBIN,EXOC2,F2,FABP5,FAM120A,FAM129B,FBLN2,FBLN5,FEN1,FKBP5,FLNA,FN1,FNTA,FUS,G6PD,GALNT2,GLDC,GLS,GRB2,GTF2I,H…	212
Cancer,Organismal Injury and Abnormalities	Development of malignant tumor	7.65e-16		-1.887	AASS,ABAT,ABCD1,ABCF2,ABHD11,ACACB,ACAD11,ACADM,ACADS,ACADSB,ACOT7,ACOT9,ACOX2,ACSL1,ACSL4,ACSM3,ACTR2,ADAR,ADD3,ADH1B,ADH1C,AEBP1,AGL,AGPS,AGRN,AGXT2,AHCYL1,AHNAK,AHNAK2,AKAP2,AKR1B10,ALDH1B1,ALDH1L1,ALDH2,ALDH8A1,ALDOA,AMT,ANAPC1,ANLN,ANP32A,ANP32B,ANP32E,ANXA2,ANXA4,ANXA5,AP3D1,API5,APIP,APOA4,APOE,ARAP1,ARHGAP10,ARHGEF16,ARMC8,ASPG,ASPN,ASS1,ATG16L1,ATG3,ATXN2L,AUH,B2M,BAG6,BAX,BCAM,BCAT1,BCC…	623
Cancer,Gastrointestinal Disease,Organismal Injury and Abnormalities	Gastrointestinal adenocarcinoma	1.14e-15			AADAT,AASS,ABCD1,ABCF2,ABHD11,ACAA1,ACAA2,ACACB,ACADSB,ACOT7,ACOT9,ACOX2,ACSL4,ACSM2A,ACTBL2,ADAR,ADD3,ADH1B,ADH6,ADRM1,AEBP1,AFMID,AGA,AGL,AGPS,AGRN,AGXT2,AHCYL1,AHNAK,AHNAK2,AHSA1,AKAP2,AKR1B10,ALDH1B1,ALDH1L1,ALDH2,ALDH8A1,ALDOA,AMT,ANAPC1,ANLN,ANXA4,AP1M1,AP3D1,API5,APIP,APOA4,ARAP1,ARF5,ARG1,ARHGAP10,ARHGAP17,ARHGEF16,ARMC8,ASPG,ASPN,ASS1,ATG16L1,ATG3,ATXN2L,AUP1,AZU1,B2M,BAG6,BAX,BCAM,BCAT1…	697
Cancer,Organismal Injury and Abnormalities,Reproductive System Disease	Mammary tumor	1.33e-15		0.411	ABAT,ACAA1,ACACB,ACOT9,ADRM1,AGPS,AGR2,ALDH1B1,ALDH1L1,ALDOA,ALYREF,ANLN,ANP32B,APOA1,APOE,BAX,BCAM,BCAT1,BCCIP,BLVRA,BMX,C2,CAPN2,CASK,CASP3,CAT,CBX3,CBX8,CDC37,CDC5L,CENPF,CHD4,CKB,CLNS1A,CNN1,CNN2,COG2,COL12A1,COL4A2,COL6A1,COL8A1,COMMD3,CROCC,CRTAP,CSNK2B,CSPG4,CTR9,CTTN,CUL4A,DDX17,DDX24,DHX29,DICER1,DKC1,DYNC1I2,ECM1,EFEMP1,EFTUD2,EIF2A,EIF2AK2,EIF2S2,EIF3H,EIF4B,ELP3,EML2,EPHX2,EPPK1,EPS8,…	259
Cancer,Organismal Injury and Abnormalities	Pelvic tumor	1.56e-15		-0.954	AADAT,AASS,ABAT,ABCD1,ABCF2,ACACB,ACAD11,ACADM,ACADS,ACADSB,ACOT7,ACOX2,ACSL1,ACSL4,ACSM3,ACTR2,ADAR,ADD3,ADGRE5,ADH1B,ADRM1,AEBP1,AGL,AGPS,AGR2,AGR3,AGXT2,AHCYL1,AHNAK,AHNAK2,AKAP2,ALDH1B1,ALDH1L1,ALDH2,ALDH8A1,ALDOA,ALYREF,AMT,ANAPC1,ANLN,ANP32B,ANP32E,ANXA2,ANXA5,AP3D1,API5,APIP,APOA1,APOA4,APOE,ARF5,ARHGAP10,ARMC8,ASNA1,ASPG,ASPN,ASS1,ATG16L1,ATXN2L,AUH,B2M,BAG6,BAX,BCAT1,BCKDHA,BCKDK,BCLAF1,…	571
Protein Synthesis	Translation	2.19e-15		0.333	CAPRIN1,CNOT7,DHX9,DICER1,DKC1,EEF1G,EIF2A,EIF2AK2,EIF2B4,EIF2B5,EIF2S2,EIF2S3,EIF3H,EIF3J,EIF4B,EIF4G2,EIF4H,FN1,FXR1,HDAC6,HNRNPK,HSPB1,ILF3,KRR1,MRPL11,MRPL12,MRPL13,MRPL14,MRPL16,MRPL18,MRPL19,MRPL21,MRPL37,MRPL41,MRPL44,MRPL53,MRPS17,MRPS2,MRPS22,MRPS27,MRPS28,MRPS5,MRPS9,MVK,NCBP1,NCL,NPC1,NXF1,PCBP1,PPP1CA,PTBP1,PTCD3,RBM3,RIDA,RPL13A,RPL35,RPL37A,RPL8,RPS27,RPS6KB1,SHMT1,SRSF3,TPR,TSFM,YB…	65
Cell Death and Survival	Apoptosis of tumor cell lines	2.82e-15	Decreased	-3.118	ACSL4,ACSM5,AGA,AHSA1,AIMP1,AKR1B10,ALDH1L1,ANXA2,ANXA5,API5,APOE,ARG1,B2M,BAG6,BAX,BCLAF1,BMX,BUB3,C5,CAPN2,CAPNS1,CASP3,CAT,CBX3,CD59,CDC37,CELF1,CENPF,CLPTM1L,CNN2,COL18A1,COL4A1,COL4A2,CSPG4,CSTA,CTH,CTTN,CYB5A,DHX9,DICER1,DMGDH,DNMT1,DTYMK,EFEMP1,EIF2A,EIF2AK2,EIF2B5,EIF3H,EIF4B,EIF4G2,ELANE,EXOC2,FAM129B,FBLN1,FGA,FKBP5,FLNB,FN1,FUBP1,G6PD,GLS,GMDS,GPX2,GSN,HCLS1,HDAC6,HMGA1,HNF4A,HNRNPA1,H…	165
Cell Death and Survival	Cell death of tumor cell lines	2.86e-15	Decreased	-2.515	ACSL4,ACSM5,ADAR,ADRM1,AGA,AGR2,AHSA1,AIMP1,AKR1B10,ALDH1L1,ANXA2,ANXA5,API5,APOE,ARG1,ATG3,B2M,BAG6,BAX,BCLAF1,BMX,BUB3,C5,CAPN2,CAPNS1,CASP3,CAT,CBX3,CD59,CDC25C,CDC37,CELF1,CENPF,CLPTM1L,CNN2,COL18A1,COL4A1,COL4A2,CSPG4,CSTA,CTH,CTTN,CYB5A,DCTN3,DEK,DHX9,DICER1,DMGDH,DNMT1,DTYMK,EFEMP1,EIF2A,EIF2AK2,EIF2B4,EIF2B5,EIF2S2,EIF3H,EIF4B,EIF4G2,ELANE,EXOC2,FAHD2A,FAM129B,FBLN1,FEN1,FGA,FKBP5,FLNB,FN…	196
Cancer,Gastrointestinal Disease,Organismal Injury and Abnormalities	Large intestine adenocarcinoma	3.08e-15			AADAT,AASS,ABCD1,ABCF2,ABHD11,ACAA1,ACAA2,ACACB,ACADSB,ACOT7,ACOT9,ACOX2,ACSL4,ACSM2A,ACTBL2,ADAR,ADD3,ADH6,ADRM1,AEBP1,AFMID,AGA,AGL,AGPS,AGRN,AGXT2,AHCYL1,AHNAK,AHNAK2,AHSA1,AKAP2,AKR1B10,ALDH1B1,ALDH1L1,ALDH2,ALDH8A1,ALDOA,AMT,ANAPC1,ANLN,ANXA4,AP1M1,AP3D1,API5,APIP,APOA4,ARAP1,ARF5,ARG1,ARHGAP10,ARHGAP17,ARHGEF16,ARMC8,ASPG,ASPN,ASS1,ATG16L1,ATG3,ATXN2L,AUP1,AZU1,B2M,BAG6,BAX,BCAM,BCAT1,BCKDH…	681
Cancer,Gastrointestinal Disease,Hepatic System Disease,Organismal Injury and Abnormalities	Hepatobiliary system cancer	7.95e-15		-0.563	AADAT,AASS,ABAT,ABCF2,ACAA1,ACAA2,ACACB,ACADSB,ACOT7,ACOX2,ACSL1,ACSM3,ACTR2,ADAR,ADH1B,ADH1C,ADRM1,AEBP1,AGA,AGRN,AGXT2,AHNAK,AHNAK2,AKR1B10,ALDH2,ALDH8A1,AMT,ANLN,ANP32B,ANP32E,ANXA2,ANXA5,AP1M1,AP3D1,API5,APIP,APOA1,APOE,ARAP1,ARG1,ARHGAP10,ARHGAP17,ARHGEF16,ARPC5,ASNA1,ASPN,ASS1,ATG16L1,ATXN2L,B2M,BAG2,BAG6,BAX,BCAT1,BCLAF1,BCS1L,BDH1,BHMT,BHMT2,BLVRA,C5,C7,CACYBP,CAD,CAMK2D,CAP2,CAPG,CAT,CBX…	426
Cancer,Organismal Injury and Abnormalities	Pelvic cancer	9.16e-15		0.152	AADAT,AASS,ABAT,ABCD1,ABCF2,ACACB,ACAD11,ACADM,ACADS,ACADSB,ACOT7,ACOX2,ACSL1,ACSL4,ACSM3,ACTR2,ADAR,ADD3,ADH1B,ADRM1,AEBP1,AGL,AGPS,AGR2,AGR3,AGXT2,AHCYL1,AHNAK,AHNAK2,AKAP2,ALDH1B1,ALDH1L1,ALDH2,ALDH8A1,AMT,ANAPC1,ANLN,ANP32B,ANP32E,ANXA2,ANXA5,AP3D1,API5,APIP,APOA1,APOA4,APOE,ARF5,ARHGAP10,ARMC8,ASNA1,ASPG,ASPN,ASS1,ATG16L1,ATXN2L,AUH,B2M,BAG6,BAX,BCAT1,BCKDHA,BCKDK,BCLAF1,BDH1,BMX,BST1,C2,C5,…	560
Molecular Transport	Nuclear export	1.01e-14			AHCYL1,ALYREF,CHP1,DDX39A,HNRNPA1,HNRNPA2B1,KHDRBS1,NCBP1,NPM1,NUP107,NUP133,NUP155,NUP205,NUP210,NUP35,NUP37,NUP43,NUP62,NUP93,NXF1,RAN,RBM8A,SRSF1,SRSF2,SRSF3,SRSF5,SRSF6,SRSF7,SRSF9,TPR,U2AF1/U2AF1L5,U2AF2	32
Molecular Transport,RNA Trafficking	Export of RNA	1.37e-14		1.226	ALYREF,DDX39A,HNRNPA2B1,KHDRBS1,NCBP1,NUP107,NUP133,NUP155,NUP205,NUP210,NUP35,NUP37,NUP43,NUP62,NUP93,NXF1,RAN,RBM8A,SRSF1,SRSF2,SRSF3,SRSF5,SRSF6,SRSF7,SRSF9,TPR,U2AF1/U2AF1L5,U2AF2	28
Cellular Movement	Invasion of cells	1.49e-14	Increased	5.524	ACSL4,ADGRE5,AGR2,AHNAK,ANXA2,ARG1,BAX,BCAT1,CAPN2,CAPNS1,CASP3,CAT,CD74,COL18A1,CRKL,CRTAP,CSK,CSNK2B,CSPG4,CTSH,CTSS,CTTN,DBNL,DICER1,DPYSL3,ECM1,EFEMP1,EIF2AK2,EPS8,F11R,F2,FABP5,FAM120A,FAM129B,FBLN1,FBLN2,FBLN5,FLNA,FMOD,FN1,GALNT2,GMFG,GRB2,GSN,HGS,HMGA1,HMGB1,HMGB3,HNRNPA2B1,HSP90AB1,IFITM3,IKZF1,ILF3,IPO7,IRF6,ITGA2,ITGAL,ITGAM,ITGAV,LAMA5,LAMC1,LCN2,LIMA1,LMNA,LTF,MAP4,MAPK1,MAPK14,MAPK3…	136
Protein Synthesis	Translation of protein	2.06e-14		0.359	CAPRIN1,CNOT7,DHX9,DICER1,DKC1,EIF2A,EIF2AK2,EIF2B4,EIF2B5,EIF2S2,EIF2S3,EIF3H,EIF3J,EIF4B,EIF4G2,EIF4H,FN1,FXR1,HDAC6,HNRNPK,HSPB1,ILF3,KRR1,MRPL11,MRPL12,MRPL13,MRPL14,MRPL16,MRPL18,MRPL19,MRPL21,MRPL37,MRPL41,MRPL44,MRPL53,MRPS17,MRPS2,MRPS22,MRPS27,MRPS28,MRPS5,MRPS9,MVK,NCBP1,NCL,NXF1,PCBP1,PPP1CA,PTBP1,PTCD3,RBM3,RIDA,RPL13A,RPL35,RPL37A,RPL8,RPS27,RPS6KB1,SHMT1,SRSF3,TPR,YBX1	62
Developmental Disorder,Hereditary Disorder,Organismal Injury and Abnormalities,Skeletal and Muscular Disorders	Emery-Dreifuss muscular dystrophy	2.24e-14			ASPN,CFL1,CNN3,COL3A1,COL4A1,COL4A2,COL5A1,COL6A1,COL6A2,COL6A3,EMD,IFI30,LMNA,S100A11,SDCBP,SERPINH1,SUN2,SYNE1,TAX1BP3,TGFBI,TMEM43,TUBB2A	22
Infectious Diseases	Infection by RNA virus	2.34e-14	Increased	5.536	AASS,ACACB,ACADSB,ACTR2,ADGRE5,AES,AMDHD2,ANXA2,APOA1,APOE,ARPC5,ATOX1,B2M,BAG6,BCLAF1,C2,C5,CAD,CD74,CLNS1A,CLTA,CNOT7,COG2,COL5A1,CROCC,CRP,CTSS,DHX9,DIMT1,EIF2AK2,EIF2B5,EIF3H,ELANE,EPS8,EXOSC10,FGA,FN1,FNTA,FXR1,GBF1,GCSH,GOSR2,GPD2,HGS,HIP1,HMGB1,HNRNPH1,HNRNPK,HNRNPU,ICAM1,IFITM3,ITGAM,ITSN2,KHDRBS1,LCN2,LTF,MAP4,MBL2,MDN1,MGAT1,MMP9,MRC1,MRE11,MRPL44,NCKAP1,NFKB1,NIPSNAP2,NMT1,NOP56,NRBP1,…	121
Cancer,Organismal Injury and Abnormalities	Lymphatic system tumor	2.47e-14		-0.446	AASS,ABAT,ACAD11,ACOT9,ADAR,AGL,AGR2,AHNAK,AIMP1,ANXA2,ANXA4,ANXA5,APOE,ARHGAP17,B2M,BAG2,BAX,BCAT1,BCLAF1,BUB3,C7,CAD,CASP3,CAT,CD58,CD63,CD74,CDC37L1,CFL1,CHD4,CNP,COL12A1,COL18A1,COL3A1,COL4A1,COL4A2,COL6A1,COL6A2,COPS4,CPSF7,CRKL,CRP,CSK,CSNK2B,CTSH,CTSS,CTTN,CYP4F11,DEK,DES,DICER1,DMGDH,DNMT1,DOCK2,DPT,EHD1,EIF2A,ENPP1,EPS8,F10,F11R,F2,FAM129B,FEN1,FLG2,FLNA,FN1,FTCD,FUBP1,FUS,GBP2,GOT2,GPD2…	216
Cancer,Organismal Injury and Abnormalities,Reproductive System Disease	Breast cancer	2.72e-14		0.391	ABAT,ACAA1,ACACB,ACOT9,ADRM1,AGR2,ALDH1B1,ALDH1L1,ALDOA,ANLN,ANP32B,APOA1,APOE,BAX,BCAM,BCAT1,BCCIP,BLVRA,BMX,C2,CAPN2,CASK,CASP3,CAT,CBX3,CBX8,CDC5L,CENPF,CHD4,CKB,CLNS1A,CNN1,CNN2,COG2,COL12A1,COL4A2,COL6A1,COL8A1,COMMD3,CROCC,CRTAP,CSNK2B,CSPG4,CTR9,CUL4A,DDX17,DDX24,DHX29,DICER1,DKC1,DYNC1I2,ECM1,EFEMP1,EFTUD2,EIF2AK2,EIF2S2,EIF3H,EIF4B,ELP3,EML2,EPHX2,EPPK1,EPS8,ESYT2,EXOSC9,F10,F11R,FABP5,F…	243
Cancer,Organismal Injury and Abnormalities,Reproductive System Disease	Genital tumor	2.83e-14		-0.822	AADAT,AASS,ABAT,ABCD1,ABCF2,ACACB,ACAD11,ACADM,ACADS,ACADSB,ACOT7,ACOX2,ACSL1,ACSL4,ACSM3,ACTR2,ADAR,ADD3,ADGRE5,ADH1B,ADRM1,AEBP1,AGL,AGPS,AGR2,AGR3,AGXT2,AHCYL1,AHNAK,AHNAK2,AKAP2,ALDH1B1,ALDH1L1,ALDH2,ALDH8A1,ALDOA,ALYREF,AMT,ANAPC1,ANLN,ANP32B,ANP32E,ANXA2,ANXA5,AP3D1,API5,APIP,APOA1,APOA4,APOE,ARF5,ARHGAP10,ASNA1,ASPG,ASPN,ASS1,ATG16L1,ATXN2L,AUH,B2M,BAG6,BAX,BCAT1,BCKDHA,BCKDK,BCLAF1,BDH1,B…	536
Cancer,Organismal Injury and Abnormalities	Breast or pancreatic cancer	3.09e-14		1.091	AASS,ABAT,ABCD1,ABCF2,ACAA1,ACACB,ACAD11,ACADS,ACOT9,ACSM5,ACTBL2,ACTR2,ADAR,ADRM1,AEBP1,AGL,AGR2,AGR3,AGXT2,AHNAK,AHNAK2,AKAP2,ALDH1B1,ALDH1L1,ALDOA,ANLN,ANP32A,ANP32B,ANP32E,AP3D1,API5,APIP,APOA1,APOE,ATG16L1,ATPAF2,AUH,AUP1,B2M,BAG6,BAX,BCAM,BCAT1,BCCIP,BCLAF1,BDH1,BLVRA,BMX,BST1,C2,C5,C5orf51,C8B,C8G,CAD,CAPN2,CASK,CASP3,CAT,CBX3,CBX8,CD59,CD63,CD74,CDC5L,CENPF,CHD4,CKB,CLIC1,CLNS1A,CNN1,CNN2…	429
Cellular Movement	Cell movement	3.69e-14	Increased	6.545	ACSL4,ACTR2,ADGRE5,AGR2,AHNAK,AIMP1,ALDH2,ALDOA,ANXA2,ANXA5,APOA1,APOE,ARAP1,ARG1,ARHGEF16,ATG16L1,ATG3,AZU1,BAX,BCAM,BCAT1,BMX,BST1,C2,C5,C6,CAMK2D,CAPG,CAPN2,CAPNS1,CARMIL1,CAT,CD58,CD59,CD63,CD74,CENPF,CFL1,CHD4,CNN1,CNN2,CNN3,CNP,COL18A1,COL3A1,COL4A1,COL4A2,COL4A3,COL6A1,CORO1A,CPB2,CRIP2,CRKL,CRP,CSK,CSNK2B,CSPG4,CTSH,CTSS,CTTN,CUL4A,DCLK1,DEK,DICER1,DNMT1,DOCK2,DPT,DPYSL3,DRG2,ECM1,EFEMP1,…	257
Molecular Transport,RNA Trafficking	Export of mRNA	3.84e-14		0.895	ALYREF,DDX39A,HNRNPA2B1,KHDRBS1,NCBP1,NUP107,NUP133,NUP155,NUP205,NUP210,NUP35,NUP37,NUP43,NUP62,NUP93,NXF1,RBM8A,SRSF1,SRSF2,SRSF3,SRSF5,SRSF6,SRSF7,SRSF9,TPR,U2AF1/U2AF1L5,U2AF2	27
Molecular Transport,RNA Trafficking	Nuclear export of RNA	3.84e-14			ALYREF,DDX39A,HNRNPA2B1,KHDRBS1,NCBP1,NUP107,NUP133,NUP155,NUP205,NUP210,NUP35,NUP37,NUP43,NUP62,NUP93,NXF1,RBM8A,SRSF1,SRSF2,SRSF3,SRSF5,SRSF6,SRSF7,SRSF9,TPR,U2AF1/U2AF1L5,U2AF2	27
Molecular Transport	Nuclear export of molecule	5.1e-14			AHCYL1,ALYREF,CHP1,DDX39A,HNRNPA2B1,KHDRBS1,NCBP1,NUP107,NUP133,NUP155,NUP205,NUP210,NUP35,NUP37,NUP43,NUP62,NUP93,NXF1,RAN,RBM8A,SRSF1,SRSF2,SRSF3,SRSF5,SRSF6,SRSF7,SRSF9,TPR,U2AF1/U2AF1L5,U2AF2	30
Molecular Transport,RNA Trafficking	Transport of mRNA	6.23e-14		0.895	ALYREF,DDX39A,FUS,HNRNPA2B1,KHDRBS1,NCBP1,NUP107,NUP133,NUP155,NUP205,NUP210,NUP35,NUP37,NUP43,NUP62,NUP93,NXF1,RBM8A,SRSF1,SRSF2,SRSF3,SRSF5,SRSF6,SRSF7,SRSF9,TPR,U2AF1/U2AF1L5,U2AF2	28
Molecular Transport,RNA Trafficking	Transport of RNA	7.24e-14		1.226	ALYREF,DDX39A,FUS,HNRNPA2B1,KHDRBS1,NCBP1,NUP107,NUP133,NUP155,NUP205,NUP210,NUP35,NUP37,NUP43,NUP62,NUP93,NXF1,RAN,RBM8A,SRSF1,SRSF2,SRSF3,SRSF5,SRSF6,SRSF7,SRSF9,TPR,U2AF1/U2AF1L5,U2AF2	29
Amino Acid Metabolism,Small Molecule Biochemistry	Metabolism of alpha-amino acid	8.23e-14			AADAT,AASS,ADSS,AFMID,AMT,ASS1,BHMT,BHMT2,CTH,FTCD,GCSH,GLDC,GLUD1,GLYAT,GOT2,GSTZ1,HPD,MSRA,MTHFD1,PAH,PKM,PRODH2,PSPH,RHOC,SHMT1,SMS	26
Cancer,Organismal Injury and Abnormalities,Reproductive System Disease	Breast or ovarian cancer	9.31e-14		0.391	AASS,ABAT,ABCD1,ABCF2,ACAA1,ACACB,ACAD11,ACADS,ACOT9,ACTR2,ADRM1,AEBP1,AGL,AGR2,AGR3,AHNAK2,AKAP2,ALDH1B1,ALDH1L1,ALDOA,ANLN,ANP32B,APIP,APOA1,APOE,AUH,B2M,BAG6,BAX,BCAM,BCAT1,BCCIP,BCLAF1,BDH1,BLVRA,BMX,C2,C5,C8B,CAD,CAPN2,CASK,CASP3,CAT,CBX3,CBX8,CDC5L,CENPF,CHD4,CKB,CLIC1,CLNS1A,CNN1,CNN2,COG2,COL12A1,COL18A1,COL3A1,COL4A1,COL4A2,COL5A1,COL6A1,COL6A2,COL6A3,COL8A1,COMMD3,CPB2,CRKL,CROCC,CRP,CR…	330
Molecular Transport,RNA Trafficking	Nuclear export of mRNA	1.07e-13			ALYREF,DDX39A,HNRNPA2B1,NCBP1,NUP107,NUP133,NUP155,NUP205,NUP210,NUP35,NUP37,NUP43,NUP62,NUP93,NXF1,RBM8A,SRSF1,SRSF2,SRSF3,SRSF5,SRSF6,SRSF7,SRSF9,TPR,U2AF1/U2AF1L5,U2AF2	26
Cancer,Gastrointestinal Disease,Organismal Injury and Abnormalities	Colorectal tumor	1.56e-13		0.445	AASS,ABCF2,ACACB,ACADS,ACOT7,ACOT9,ACOX2,ACSL5,ADAR,ADD3,AEBP1,AGL,AGR2,AGR3,AGRN,AHNAK2,AIMP1,AKAP2,AKR1B10,ALDH1B1,ALDH1L1,ALDH2,ALDH8A1,ALDOA,ALYREF,ANAPC1,ANXA2,ANXA4,ANXA5,AP3D1,API5,APIP,APOA4,ARAP1,ARG1,ARHGAP10,ARHGEF16,ARMC8,ASPG,ASPN,ASS1,ATG16L1,ATG3,ATXN2L,B2M,BAG6,BAX,BCAM,BCKDK,BMX,BST1,BYSL,C2,C7,C8G,CACYBP,CAD,CAPG,CAPN5,CAPRIN1,CASK,CASP3,CAT,CBX3,CCDC88B,CD2AP,CD58,CDC25C,CDC5L,…	456
Cancer,Organismal Injury and Abnormalities,Renal and Urological Disease	Urinary tract cancer	3.06e-13		-0.466	AADAT,ABHD11,ACACB,ACADS,ACOT7,ACOX2,AEBP1,AGL,AGXT2,AHNAK,AHNAK2,AKAP2,ANLN,ANXA2,ANXA5,AP3D1,ATXN2L,B2M,BAX,BCKDHA,BCLAF1,BST1,C2,C8G,CAD,CASP3,CDC25C,CDC37,CENPF,CFL2,CHD4,COL12A1,COL6A2,COL6A3,COPS4,CPB2,CPS1,CRP,CSK,CSPG4,CTR9,DHX9,DICER1,DNAJC10,DOCK2,ECM1,EHD3,EHHADH,EIF4G2,EPB41,EPPK1,EPS15L1,F11R,FABP5,FAM120A,FBLN5,FCN1,FGA,FGGY,FLAD1,FLG2,FLNA,FN1,FUBP1,FYCO1,G6PD,GAR1,GBP2,GEMIN8,GLS,…	221
Protein Synthesis	Expression of protein	3.1e-13		0.511	CAPRIN1,CNOT7,DHX9,DICER1,DKC1,EIF2A,EIF2AK2,EIF2B4,EIF2B5,EIF2S2,EIF2S3,EIF3H,EIF3J,EIF4B,EIF4G2,EIF4H,FN1,FXR1,HDAC6,HNRNPK,HSPB1,ILF3,KHDRBS1,KRR1,MAP2K3,MRPL11,MRPL12,MRPL13,MRPL14,MRPL16,MRPL18,MRPL19,MRPL21,MRPL37,MRPL41,MRPL44,MRPL53,MRPS17,MRPS2,MRPS22,MRPS27,MRPS28,MRPS5,MRPS9,MVK,MYBBP1A,NCBP1,NCL,NFKB1,NXF1,PCBP1,PPP1CA,PTBP1,PTCD3,RBM3,RIDA,RPL13A,RPL35,RPL37A,RPL8,RPS27,RPS6KB1,SHMT1…	68
Gastrointestinal Disease,Hepatic System Disease,Organismal Injury and Abnormalities	Liver lesion	3.3e-13		-1.305	AASS,ABAT,ABCF2,ACAA1,ACAA2,ACACB,ACADSB,ACOT7,ACOX2,ACSL1,ACSM3,ACTR2,ADAR,ADH1B,ADRM1,AEBP1,AGA,AGRN,AGXT2,AHNAK,AHNAK2,AKR1B10,ALDH2,ALDH8A1,AMT,ANAPC1,ANLN,ANP32B,ANP32E,ANXA2,ANXA5,AP1M1,AP3D1,API5,APIP,APOA1,APOE,ARAP1,ARG1,ARHGAP10,ARHGAP17,ARPC5,ASNA1,ASPN,ASS1,ATG16L1,ATXN2L,B2M,BAG2,BAG6,BAX,BCAT1,BCLAF1,BCS1L,BDH1,BHMT,BHMT2,BLVRA,C5,C7,CACYBP,CAD,CAMK2D,CAP2,CAPG,CASP3,CAT,CBX3,CBX8,C…	467
Cancer,Gastrointestinal Disease,Organismal Injury and Abnormalities	Colorectal cancer	3.31e-13			AASS,ABCF2,ACACB,ACADS,ACOT7,ACOT9,ACOX2,ACSL5,ADAR,ADD3,AEBP1,AGL,AGR2,AGR3,AGRN,AHNAK2,AIMP1,AKAP2,AKR1B10,ALDH1B1,ALDH1L1,ALDH2,ALDH8A1,ALDOA,ANAPC1,ANXA2,ANXA4,ANXA5,AP3D1,API5,APIP,APOA4,ARAP1,ARG1,ARHGAP10,ARHGEF16,ARMC8,ASPG,ASPN,ASS1,ATG16L1,ATG3,ATXN2L,B2M,BAG6,BAX,BCAM,BCKDK,BMX,BST1,BYSL,C2,C7,C8G,CACYBP,CAD,CAPG,CAPN5,CAPRIN1,CASK,CASP3,CAT,CBX3,CCDC88B,CD2AP,CD58,CDC25C,CDC5L,CENPF,C…	448
Cancer,Gastrointestinal Disease,Hepatic System Disease,Organismal Injury and Abnormalities	Liver cancer	3.48e-13		-0.371	AASS,ABAT,ABCF2,ACAA1,ACAA2,ACACB,ACADSB,ACOT7,ACOX2,ACSL1,ACSM3,ACTR2,ADAR,ADH1B,ADRM1,AEBP1,AGRN,AGXT2,AHNAK,AHNAK2,AKR1B10,ALDH2,ALDH8A1,AMT,ANLN,ANP32B,ANP32E,ANXA2,ANXA5,AP1M1,AP3D1,API5,APIP,APOA1,APOE,ARAP1,ARG1,ARHGAP10,ARHGAP17,ARPC5,ASNA1,ASPN,ASS1,ATG16L1,ATXN2L,B2M,BAG2,BAG6,BAX,BCAT1,BCLAF1,BCS1L,BDH1,BHMT,BHMT2,BLVRA,C5,C7,CACYBP,CAD,CAMK2D,CAP2,CAPG,CAT,CBX3,CBX8,CD58,CDC37L1,CELF1…	400
Hematological Disease,Immunological Disease	Lymphoproliferative disorder	3.61e-13		-0.734	AASS,ABAT,ACAD11,ACOT9,ADAR,AGL,AHNAK,AIMP1,ANXA2,ANXA4,ANXA5,APOE,ARHGAP17,B2M,BAG2,BAX,BCAT1,BCLAF1,BUB3,C7,CAD,CASP3,CAT,CD58,CD63,CD74,CDC37L1,CFL1,CHD4,CNP,COL12A1,COL18A1,COL3A1,COL4A1,COL4A2,COL6A1,COL6A2,COPS4,CPSF7,CRKL,CRP,CSK,CSNK2B,CTSH,CTTN,CYP4F11,DEK,DES,DICER1,DMGDH,DNMT1,DOCK2,DPT,EHD1,EIF2A,ENPP1,F10,F11R,F2,FAM129B,FEN1,FLG2,FLNA,FN1,FTCD,FUBP1,FUS,GBP2,GOT2,GPD2,GRB2,GRHPR,GSN…	208
Cell Cycle	Cell cycle progression	4.01e-13		0.988	ACSM5,ACTL6A,AHNAK,ANLN,APOE,ARG1,ARPC5,BANF1,BAX,BCCIP,BUB3,C5,CAPN2,CASP3,CD59,CDC25C,CDC37,CDC5L,CENPF,CHD4,CHMP4B,CIRBP,COL6A3,CSNK2B,CTH,CUL3,CUL4A,DCLK1,DDX17,DHX9,DICER1,DNMT1,EIF2AK2,EIF4G2,EPS8,F2,FLNA,FNTA,GBF1,GBP2,GRB2,HAUS1,HMGB1,HNF4A,HNRNPU,HSPB1,HTRA2,IKZF1,IRF6,ITGA2,ITGAL,KHDRBS1,KIF11,LAMTOR3,LAMTOR5,LETM1,LGALS4,LMNA,LTBP1,MAP4,MAPK1,MAPK14,MAPK3,MARCKS,MCM7,MECP2,MKI67,MMS22L…	135
Skeletal and Muscular Disorders	Laminopathy	4.52e-13			AIMP1,ASPN,CFL1,CNN3,COL3A1,COL4A1,COL4A2,COL5A1,COL6A1,COL6A2,COL6A3,EMD,FN1,IFI30,LBR,LMNA,LMNB2,MMP9,S100A11,SDCBP,SERPINH1,SUN2,SYNE1,TAX1BP3,TGFBI,TMEM43,TUBB2A	27
Cancer,Hematological Disease,Organismal Injury and Abnormalities	Lymphocytic neoplasm	5.11e-13		-0.734	AASS,ABAT,ACAD11,ACOT9,ADAR,AGL,AHNAK,AIMP1,ANXA2,ANXA4,ANXA5,APOE,ARHGAP17,B2M,BAG2,BAX,BCAT1,BCLAF1,BUB3,C7,CAD,CASP3,CAT,CD58,CD63,CD74,CDC37L1,CFL1,CHD4,CNP,COL12A1,COL18A1,COL3A1,COL4A1,COL4A2,COL6A1,COL6A2,COPS4,CPSF7,CRKL,CRP,CSK,CSNK2B,CTSH,CTTN,CYP4F11,DEK,DES,DICER1,DMGDH,DNMT1,DOCK2,DPT,EHD1,EIF2A,ENPP1,F10,F11R,F2,FAM129B,FEN1,FLG2,FLNA,FN1,FTCD,FUBP1,FUS,GBP2,GOT2,GPD2,GRB2,GRHPR,GSN…	207
Cancer,Gastrointestinal Disease,Hepatic System Disease,Organismal Injury and Abnormalities	Liver tumor	5.17e-13		0.064	AASS,ABAT,ABCF2,ACAA1,ACAA2,ACACB,ACADSB,ACOT7,ACOX2,ACSL1,ACSM3,ACTR2,ADAR,ADH1B,ADRM1,AEBP1,AGRN,AGXT2,AHNAK,AHNAK2,AKR1B10,ALDH2,ALDH8A1,AMT,ANAPC1,ANLN,ANP32B,ANP32E,ANXA2,ANXA5,AP1M1,AP3D1,API5,APIP,APOA1,APOE,ARAP1,ARG1,ARHGAP10,ARHGAP17,ARPC5,ASNA1,ASPN,ASS1,ATG16L1,ATXN2L,B2M,BAG2,BAG6,BAX,BCAT1,BCLAF1,BCS1L,BDH1,BHMT,BHMT2,BLVRA,C5,C7,CACYBP,CAD,CAMK2D,CAP2,CAPG,CAT,CBX3,CBX8,CD58,CDC37L…	452
Cancer,Hematological Disease,Immunological Disease,Organismal Injury and Abnormalities	Neoplasia of leukocytes	5.48e-13		-0.711	AASS,ABAT,ACAD11,ACOT9,ADAR,AGL,AHNAK,AIMP1,ANXA2,ANXA4,ANXA5,APOE,ARHGAP17,B2M,BAG2,BAX,BCAT1,BCLAF1,BUB3,C5,C7,CAD,CASP3,CAT,CD58,CD63,CD74,CDC37L1,CFL1,CHD4,CNP,COL12A1,COL18A1,COL3A1,COL4A1,COL4A2,COL6A1,COL6A2,COPS4,CPSF7,CRKL,CRP,CSK,CSNK2B,CTSH,CTTN,CYP4F11,DEK,DES,DICER1,DMGDH,DNMT1,DOCK2,DPT,EHD1,EIF2A,ENPP1,F10,F11R,F2,FAM129B,FEN1,FLG2,FLNA,FN1,FTCD,FUBP1,FUS,GBP2,GOT2,GPD2,GRB2,GRHPR,…	207
Cancer,Organismal Injury and Abnormalities,Reproductive System Disease	Genital tract cancer	5.57e-13			AADAT,AASS,ABAT,ABCD1,ABCF2,ACACB,ACAD11,ACADM,ACADS,ACADSB,ACOT7,ACOX2,ACSL1,ACSL4,ACSM3,ACTR2,ADAR,ADD3,ADH1B,ADRM1,AEBP1,AGL,AGPS,AGR2,AGR3,AGXT2,AHCYL1,AHNAK,AHNAK2,AKAP2,ALDH1B1,ALDH1L1,ALDH2,ALDH8A1,AMT,ANAPC1,ANLN,ANP32B,ANP32E,ANXA2,ANXA5,AP3D1,API5,APIP,APOA1,APOA4,APOE,ARF5,ARHGAP10,ASNA1,ASPG,ASPN,ASS1,ATG16L1,ATXN2L,AUH,B2M,BAG6,BAX,BCAT1,BCKDHA,BCKDK,BCLAF1,BDH1,BMX,BST1,C2,C5,C5orf5…	522
Cancer,Gastrointestinal Disease,Organismal Injury and Abnormalities	Hepatobiliary carcinoma	5.89e-13		0.852	AADAT,AASS,ABAT,ABCF2,ACAA1,ACAA2,ACACB,ACADSB,ACOT7,ACOX2,ACSL1,ACSM3,ACTR2,ADAR,ADH1B,ADH1C,ADRM1,AEBP1,AGA,AGRN,AGXT2,AHNAK,AHNAK2,AKR1B10,ALDH2,ALDH8A1,AMT,ANLN,ANP32B,ANP32E,ANXA2,ANXA5,AP1M1,AP3D1,API5,APIP,APOE,ARAP1,ARG1,ARHGAP10,ARHGAP17,ARHGEF16,ARPC5,ASNA1,ASPN,ASS1,ATG16L1,ATXN2L,B2M,BAG2,BAG6,BAX,BCAT1,BCLAF1,BCS1L,BDH1,BHMT,BLVRA,C5,C7,CACYBP,CAD,CAMK2D,CAP2,CAPG,CAT,CBX3,CBX8,CD58,…	406
Protein Synthesis	Polymerization of protein	5.95e-13		1.353	AASS,ACACB,ACADM,ACADS,AGRN,AHNAK,AKAP2,ANXA2,ANXA5,APIP,BAX,CAMK2D,CAT,CD74,CHMP4B,CHP1,CORO1A,CPSF7,CRP,CTH,DCXR,DPYSL3,EHD1,EHD3,EHD4,EPS8,FBP1,FGA,FGB,FGG,FUS,GFPT1,GLS,GRB2,GRHPR,GSDMD,GSN,HAO2,HDAC6,HM13,IKZF1,JCHAIN,KHDRBS1,LETM1,MBL2,MMP9,NME2,NPM1,OPTN,PFKM,PFKP,PFN1,PKM,PLS1,PPP5C,RBMX,S100A10,SEPT11,SEPT7,SEPT9,SHMT1,SQSTM1,TRA2B,TRIM28,UPB1,VASP,VWF,YWHAB	68
Gastrointestinal Disease,Organismal Injury and Abnormalities	Colorectal disorder	6.15e-13		-0.228	AASS,ABCF2,ACACB,ACADS,ACOT7,ACOT9,ACOX2,ACSL5,ADAR,ADD3,AEBP1,AGL,AGR2,AGR3,AGRN,AHNAK,AHNAK2,AIMP1,AKAP2,AKR1B10,ALDH1B1,ALDH1L1,ALDH2,ALDH8A1,ALDOA,ALYREF,ANAPC1,ANXA2,ANXA4,ANXA5,AP3D1,API5,APIP,APOA4,ARAP1,ARG1,ARHGAP10,ARHGEF16,ARMC8,ASPG,ASPN,ASS1,ATG16L1,ATG3,ATXN2L,B2M,BAG6,BAX,BCAM,BCKDK,BMX,BST1,BYSL,C2,C7,C8G,CACYBP,CAD,CAPG,CAPN5,CAPRIN1,CASK,CASP3,CAT,CBX3,CCDC88B,CD2AP,CD58,CDC25C,…	464
Developmental Disorder,Hereditary Disorder,Organismal Injury and Abnormalities,Skeletal and Muscular Disorders	Autosomal dominant Emery-Dreifuss muscular dystrophy	6.65e-13			ASPN,CFL1,CNN3,COL3A1,COL4A1,COL4A2,COL5A1,COL6A1,COL6A2,COL6A3,IFI30,LMNA,S100A11,SDCBP,SERPINH1,SYNE1,TAX1BP3,TGFBI,TMEM43,TUBB2A	20
Cancer,Organismal Injury and Abnormalities	Lymphoid cancer	7.39e-13		-0.708	AASS,ABAT,ACAD11,ACOT9,ADAR,AGL,AHNAK,AIMP1,ANXA2,ANXA4,ANXA5,APOE,ARHGAP17,B2M,BAG2,BAX,BCAT1,BCLAF1,BUB3,C7,CAD,CASP3,CAT,CD58,CD63,CD74,CDC37L1,CFL1,CHD4,CNP,COL12A1,COL18A1,COL3A1,COL4A1,COL4A2,COL6A1,COL6A2,COPS4,CPSF7,CRKL,CRP,CSK,CSNK2B,CTSH,CTTN,CYP4F11,DEK,DES,DICER1,DMGDH,DNMT1,DOCK2,DPT,EHD1,EIF2A,ENPP1,F10,F11R,F2,FAM129B,FEN1,FLG2,FLNA,FN1,FTCD,FUBP1,FUS,GBP2,GOT2,GPD2,GRB2,GRHPR,GSN…	208
Cancer,Gastrointestinal Disease,Hepatic System Disease,Organismal Injury and Abnormalities	Hepatocellular carcinoma	7.53e-13		1.504	ABAT,ACOX2,ACSM3,ADAR,AGXT2,AKR1B10,ALDH2,ALDH8A1,ANLN,ANXA5,ARG1,ARHGAP10,ARHGAP17,ARPC5,ASS1,BAG2,BHMT,C7,CAP2,CAT,CENPF,CLIC1,COL4A2,CPS1,CTTN,CYB5A,DCLK1,DOCK2,DPP3,DPT,ECHS1,EHD3,EIF2AK2,EIF3H,F10,F2,FBLN1,FBLN5,FBP1,FGA,FGB,FGG,FN1,FTCD,GBP2,GHITM,GLUD1,GP5,GPX2,GRHPR,H2AFY,HMGB1,HNF4A,HNRNPA1,HNRNPK,HPD,HSP90AB1,ICAM1,IFITM3,ILF2,ILF3,IPO7,JCHAIN,KHDRBS1,KIF5B,KMO,LAMA4,LMCD1,MAPRE1,MCM2,M…	115
Cell Death and Survival	Cell survival	9.15e-13	Increased	6.437	ACSL5,ACTL6A,ADAR,AGA,AGPS,AGR2,AGRN,AIMP1,ANAPC1,ANLN,ANXA5,APOE,ASS1,ATG3,B2M,BANF1,BAX,BCKDK,BCLAF1,BMX,C5,CAMK2D,CAPN2,CASK,CASP3,CAT,CD2AP,CD59,CD74,CHD4,CIAPIN1,CLNS1A,COL18A1,COL4A3,COPS4,CRKL,CTH,CTTN,CUL3,DHX9,DICER1,DNMT1,DPP3,DRG2,EBNA1BP2,ECM1,EFTUD2,EHD4,EIF2A,ELANE,EPS15L1,EXOC2,F2,FAM120A,FKBP5,FLNA,FN1,FUBP1,FUS,GIMAP1,GLS,GLUD1,GMFG,GRB2,H2AFY,HBZ,HIP1,HMGA1,HMGB1,HMGB2,HNRNPK,HN…	177
Cancer,Organismal Injury and Abnormalities,Renal and Urological Disease	Urinary tract tumor	1.13e-12		-0.543	AADAT,ABHD11,ACACB,ACADS,ACOT7,ACOX2,AEBP1,AGL,AGXT2,AHNAK,AHNAK2,AKAP2,ALYREF,ANLN,ANXA2,ANXA5,AP3D1,ATXN2L,B2M,BAX,BCKDHA,BCLAF1,BST1,C2,C8G,CAD,CASP3,CDC25C,CDC37,CENPF,CFL2,CHD4,COL12A1,COL6A2,COL6A3,COPS4,CPB2,CPS1,CRP,CSK,CSPG4,CTR9,DHX9,DICER1,DNAJC10,DOCK2,ECM1,EHD3,EHHADH,EIF4G2,EPB41,EPPK1,EPS15L1,F11R,FABP5,FAM120A,FBLN5,FCN1,FGA,FGGY,FLAD1,FLG2,FLNA,FN1,FUBP1,FYCO1,G6PD,GAR1,GBP2,GEMI…	223
Developmental Disorder,Hereditary Disorder,Metabolic Disease,Organismal Injury and Abnormalities	Inborn error of amino acid metabolism	1.17e-12			AASS,ABAT,AMT,ARG1,ASS1,AUH,BCKDHA,BCKDHB,CPS1,CTH,ETFDH,FLAD1,FTCD,GCDH,GCSH,GLDC,GLUD1,HPD,HTRA2,KYNU,MAN2B1,MCEE,MLPH,MMAA,MMAB,PAH,RAB27A,SARDH,SUOX	29
Infectious Diseases	Replication of virus	1.25e-12		0.966	ADAR,AHCYL1,ANXA5,AP1M1,B2M,BAX,CAD,CASP3,CAT,CD58,CNOT7,DCLK1,DEK,DHX9,DICER1,EIF2AK2,F11R,FUBP1,HBZ,HDAC6,HMGB1,HNF4A,HNRNPM,HSP90AB1,IFITM3,IGKC,IL16,ILF3,IRF6,KIF11,MAN2B1,MAP2K3,MAPK1,MGAT1,MMP9,MNDA,MVP,MX1,NCL,NFKB1,NPM1,NRBP1,NUDCD3,NUP205,NUP62,NXF1,OAS3,OPTN,PAK2,PARP1,PI4KA,PLIN3,PML,POLR2A,PRKCD,PSIP1,PTK2B,PTPN1,RAB11B,RACGAP1,RELA,RPL13A,RPL35,SAFB,SEC14L2,SERPINA1,SF3A1,SF3B6,SIRT1…	80
Tissue Development	Organization of extracellular matrix	1.29e-12			AGRN,CAPN2,CAPNS1,COL18A1,COL3A1,COL4A1,COL4A2,COL4A3,COL5A1,COL6A1,COL6A2,COL6A3,COL8A1,CTSS,ELANE,F11R,FBLN1,FBLN5,FGA,FGB,FGG,FMOD,FN1,HSPG2,ICAM1,ITGA2,ITGAL,ITGAM,ITGAV,LAMA4,LAMA5,LAMC1,MMP9,NID1,NID2,POSTN,TGFBI,THBS1,TIMP1,TNC,VCAN,VWA1,VWF	43
Cancer,Organismal Injury and Abnormalities	Genitourinary carcinoma	1.5e-12		0.478	AADAT,AASS,ABAT,ABCD1,ABCF2,ABHD11,ACACB,ACAD11,ACADM,ACADS,ACADSB,ACOT7,ACOX2,ACSL1,ACSL4,ACSM3,ACTR2,ADAR,ADD3,ADH1B,AEBP1,AGL,AGPS,AGXT2,AHCYL1,AHNAK,AHNAK2,AKAP2,ALDH1B1,ALDH1L1,ALDH2,ALDH8A1,AMT,ANAPC1,ANLN,ANP32B,ANP32E,ANXA2,ANXA5,AP3D1,API5,APIP,APOA4,APOE,ARF5,ARHGAP10,ASNA1,ASPG,ASPN,ATG16L1,ATXN2L,AUH,B2M,BAG6,BAX,BCAT1,BCCIP,BCKDHA,BCKDK,BCLAF1,BDH1,BMX,BST1,C2,C5,C5orf51,C6,C7,C8B,C8…	545
Immunological Disease	Systemic autoimmune syndrome	1.54e-12		1.722	ACADM,ACOT9,ACOX2,ACSL1,ACSL4,ACSL5,ACTL6A,ADAR,ADGRE5,ADH1C,ADSS,AES,AKR1B10,ALDH2,ALDOA,APOA1,APOE,ARG1,AZU1,B2M,BAG6,BAX,BHMT,BMX,C2,C5,CAMK2D,CAPG,CASP3,CAT,CD74,COL12A1,COL3A1,COL4A1,COL4A2,COL4A3,COL5A1,COL6A1,COL6A2,COL6A3,COL8A1,CRIP1,CRP,CSK,CTH,CTSH,CTSS,DEK,DICER1,DNMT1,DPT,ECM1,EEF1E1,EEF1G,EHD4,EIF2AK2,ELANE,EPHX2,ERGIC3,EXOSC9,F10,F11R,FABP5,FCN1,FGB,FKBP5,FN1,FUBP1,GALNT2,GAR1,GBP2…	160
Cell Signaling	Viral life cycle	1.65e-12		-1.563	ADAR,BANF1,CHMP4B,DICER1,EIF2AK2,IFITM3,ILF3,LTF,MBL2,MX1,NEDD4L,NUP107,NUP133,NUP155,NUP205,NUP210,NUP35,NUP37,NUP43,NUP62,NUP93,OAS3,PI4KA,PPIC,PSIP1,RAN,RANBP1,SEC14L2,TPR,UBE2I	30
Cancer,Hematological Disease,Organismal Injury and Abnormalities	Hematologic cancer	2.48e-12		-0.77	AASS,ABAT,ACAD11,ACOT9,ACSL4,ACSM2A,ACSM3,ADAR,AGL,AGR3,AHNAK,AHNAK2,AIMP1,AKAP2,ALDH1B1,ALDH2,ANAPC1,ANXA2,ANXA4,ANXA5,APOE,ARAP1,ARHGAP17,ASNA1,AZU1,B2M,BAG2,BAX,BCAT1,BCLAF1,BHMT,BUB3,C5,C6,C7,CAD,CAPN2,CASP3,CAT,CD58,CD63,CD74,CDC37L1,CENPF,CFL1,CHD4,CNP,COL12A1,COL18A1,COL3A1,COL4A1,COL4A2,COL4A3,COL6A1,COL6A2,COL6A3,COPS4,CORO1A,CPNE1,CPSF7,CRKL,CROCC,CRP,CSK,CSNK2B,CSPG4,CTSH,CTTN,CYP4F11,…	304
Cellular Assembly and Organization,Tissue Development	Fibrogenesis	3.05e-12	Increased	3.491	ACTR2,AIMP1,APOA1,APOE,ARAP1,BMX,CAMK2D,CARMIL1,CENPF,CFL1,CFL2,CHD4,CNP,COL18A1,COL5A1,COL6A3,CORO1A,CTTN,CUL3,DES,DPYSL3,EML2,EPPK1,F2,FMOD,FN1,GRB2,GSN,HCLS1,HDAC6,HSD11B1,HSPB1,ICAM1,KANK2,LBP,LMCD1,MAPK1,MAPK14,MAPRE1,NCKAP1,NPM1,PALLD,PDCD10,PFDN5,PFN1,PKN2,PLOD3,POSTN,PPM1F,PRKCD,PTK2B,RBBP4,RHOB,RHOC,S100A10,SERPINH1,SRC,STMN1,TGFBI,THBS1,THY1,TNC,TNS1,TPM2,TPM3,TPR,TUBB,U2AF2,UBAP2L,VASP…	74
Cell Death and Survival	Cell viability	3.28e-12	Increased	6.155	ACSL5,ACTL6A,ADAR,AGA,AGPS,AGR2,AGRN,AIMP1,ANAPC1,ANLN,ANXA5,APOE,ASS1,ATG3,B2M,BAX,BCKDK,BCLAF1,BMX,C5,CAMK2D,CAPN2,CASK,CASP3,CAT,CD2AP,CD59,CD74,CHD4,CIAPIN1,CLNS1A,COL4A3,COPS4,CRKL,CTH,CTTN,CUL3,DHX9,DICER1,DNMT1,DPP3,DRG2,EBNA1BP2,ECM1,EFTUD2,EHD4,EIF2A,EPS15L1,EXOC2,F2,FAM120A,FKBP5,FLNA,FN1,FUBP1,FUS,GIMAP1,GLS,GLUD1,GMFG,GRB2,H2AFY,HBZ,HIP1,HMGA1,HMGB1,HMGB2,HNRNPK,HNRNPU,HNRNPUL1,HSP90A…	168
Cellular Movement	Invasion of tumor cell lines	3.4e-12	Increased	6.121	ACSL4,ADGRE5,AGR2,AHNAK,ARG1,CAPN2,CAPNS1,CASP3,CAT,CD74,COL18A1,CRTAP,CSK,CSNK2B,CSPG4,CTSH,CTSS,CTTN,DBNL,DICER1,DPYSL3,ECM1,EFEMP1,EIF2AK2,EPS8,F11R,F2,FABP5,FAM120A,FAM129B,FBLN1,FBLN2,FBLN5,FN1,GALNT2,HGS,HMGA1,HMGB1,HNRNPA2B1,IFITM3,ILF3,IPO7,IRF6,ITGAL,ITGAV,LAMA5,LCN2,LIMA1,LMNA,MAP4,MAPK1,MAPK14,MAPK3,MARCKS,MMP9,MX1,NCKAP1,NDRG1,NDRG2,NDUFAF4,NME2,NPM1,PAK2,PALLD,PEA15,PKM,PLGRKT,PLS1,P…	110
Cancer,Hematological Disease,Organismal Injury and Abnormalities	Hematopoietic neoplasm	4.83e-12		-0.416	AASS,ABAT,ACAD11,ACOT9,ACSL4,ACSM2A,ACSM3,ADAR,AGL,AGR3,AHNAK,AHNAK2,AIMP1,AKAP2,ALDH1B1,ALDH2,ANAPC1,ANXA2,ANXA4,ANXA5,APOE,ARAP1,ARHGAP17,ASNA1,AZU1,B2M,BAG2,BAX,BCAT1,BCLAF1,BHMT,BUB3,C5,C6,C7,CAD,CAPN2,CASP3,CAT,CD58,CD63,CD74,CDC37L1,CENPF,CFL1,CHD4,CNP,COL12A1,COL18A1,COL3A1,COL4A1,COL4A2,COL4A3,COL6A1,COL6A2,COL6A3,COPS4,CORO1A,CPNE1,CPSF7,CRKL,CROCC,CRP,CSK,CSNK2B,CSPG4,CTSH,CTTN,CYP4F11,…	306
Cancer,Gastrointestinal Disease,Hepatic System Disease,Organismal Injury and Abnormalities	Hepatitis B virus-related hepatocellular carcinoma	5.24e-12			ANXA5,ASS1,BHMT,CAT,CLIC1,CPS1,CYB5A,ECHS1,FGB,FTCD,HNRNPK,NPM1,SARDH,SULT1A1,TUBB,UCHL5,VIM	17
Cellular Assembly and Organization,Tissue Development	Formation of filaments	5.63e-12	Increased	3.758	ACTR2,AIMP1,APOA1,APOE,ARAP1,BMX,CARMIL1,CENPF,CFL1,CNP,COL18A1,COL5A1,COL6A3,CORO1A,CTTN,CUL3,DES,DPYSL3,EML2,EPPK1,F2,FMOD,FN1,GRB2,GSN,HCLS1,HDAC6,HSPB1,ICAM1,KANK2,LMCD1,MAPK1,MAPRE1,NCKAP1,NPM1,PALLD,PDCD10,PFDN5,PFN1,PKN2,PLOD3,POSTN,PPM1F,PRKCD,PTK2B,RBBP4,RHOB,RHOC,S100A10,SERPINH1,SRC,STMN1,TGFBI,THBS1,THY1,TNC,TNS1,TPM2,TPM3,TPR,TUBB,U2AF2,UBAP2L,VASP,VIM,WASF2,YWHAQ,ZYX	68
Cancer,Hematological Disease,Immunological Disease,Organismal Injury and Abnormalities	Lymphocytic cancer	6.03e-12		-0.734	AASS,ABAT,ACAD11,ACOT9,ADAR,AGL,AHNAK,AIMP1,ANXA2,ANXA4,ARHGAP17,B2M,BAG2,BAX,BCAT1,BCLAF1,BUB3,C7,CAD,CASP3,CAT,CD58,CD63,CD74,CDC37L1,CFL1,CHD4,CNP,COL12A1,COL18A1,COL3A1,COL4A1,COL4A2,COL6A1,COL6A2,COPS4,CPSF7,CRKL,CRP,CSK,CSNK2B,CTSH,CTTN,CYP4F11,DEK,DES,DICER1,DMGDH,DNMT1,DOCK2,DPT,EHD1,EIF2A,ENPP1,F10,F11R,F2,FAM129B,FEN1,FLG2,FN1,FTCD,FUBP1,FUS,GBP2,GOT2,GPD2,GRB2,GSN,GTF2I,HAO2,HCLS1,HDAC…	198
Amino Acid Metabolism,Small Molecule Biochemistry	Metabolism of L-amino acid	6.61e-12			AADAT,AASS,ADSS,AFMID,ASS1,BHMT,BHMT2,CTH,FTCD,GLDC,GLUD1,GOT2,GSTZ1,HPD,MSRA,MTHFD1,PAH,PKM,PRODH2,PSPH,RHOC,SHMT1,SMS	23
Amino Acid Metabolism,Small Molecule Biochemistry	Catabolism of amino acids	8.47e-12			AASS,ABAT,ACADSB,AFMID,AMT,ARG1,AUH,BCAT1,BCKDHA,BCKDHB,BCKDK,DDAH2,FTCD,GCSH,GLDC,GLS,GLUD1,GOT2,GSTZ1,HPD,PAH,PRODH2,SHMT1	23
Cellular Assembly and Organization,Cellular Function and Maintenance	Organization of cytoplasm	9.31e-12	Increased	4.726	ABCD1,ACTR2,AGRN,AHNAK,AKAP2,ALDOA,ANP32A,APOE,ARAP1,ARHGAP10,ARHGAP17,ARPC5,BAX,BCCIP,BCS1L,BMX,BST1,C5,CAP2,CAPG,CAPN2,CAPNS1,CAPRIN1,CARMIL1,CASP3,CD2AP,CENPF,CFL1,CFL2,CHP1,CKB,CNN2,CNP,COG2,CORO1A,CRIP1,CRKL,CROCC,CSK,CSRP1,CTSS,CTTN,DBNL,DCLK1,DES,DICER1,DOCK2,DPYSL3,EHD1,EIF4G2,EMD,EML2,EPB41,EPHX2,EPPK1,EPS8,ERBIN,ESPN,F2,FLNA,FLNB,FN1,FTCD,GAN,GBA,GBF1,GDI1,GMFG,GSN,HDAC6,HEXB,HMGB1,HMGB…	178
Cell Morphology,Cellular Movement	Cell spreading	9.45e-12	Increased	3.104	ARAP1,BST1,CAPN2,CNN2,CORO1A,CRKL,CSK,CSPG4,DRG2,EHD1,F2,FLNA,FLNB,FN1,GBP2,HSPG2,ICAM1,IPO9,ITGA2,ITGAL,ITGAM,ITGAV,LPP,MAP4,MAPK1,MAPK14,MAPK3,MARCKS,MMP9,MYH9,PALLD,PFN1,POSTN,PTBP1,PTK2B,RACGAP1,RELA,RHOB,RHOG,RTN4,SRC,TGFBI,THBS1,THBS2,TNC,TNS1,VASP,VIM,VWF,ZYX	50
Cancer,Hematological Disease,Organismal Injury and Abnormalities	Neoplasia of blood cells	9.61e-12		-0.916	AASS,ABAT,ACAD11,ACOT9,ACSL4,ACSM2A,ACSM3,ADAR,AGL,AGR3,AHNAK,AHNAK2,AIMP1,AKAP2,ALDH1B1,ANAPC1,ANXA2,ANXA4,ANXA5,APOE,ARAP1,ARHGAP17,ASNA1,AZU1,B2M,BAG2,BAX,BCAT1,BCLAF1,BHMT,BUB3,C5,C6,C7,CAD,CAPN2,CASP3,CAT,CD58,CD63,CD74,CDC37L1,CENPF,CFL1,CHD4,CNP,COL12A1,COL18A1,COL3A1,COL4A1,COL4A2,COL4A3,COL6A1,COL6A2,COL6A3,COPS4,CORO1A,CPNE1,CPSF7,CRKL,CROCC,CRP,CSK,CSNK2B,CSPG4,CTSH,CTTN,CYP4F11,DCTN3,…	302
Infectious Diseases	Replication of RNA virus	1.11e-11		0.863	ADAR,AHCYL1,ANXA5,AP1M1,B2M,BAX,CAD,CASP3,CD58,CNOT7,DCLK1,DHX9,DICER1,EIF2AK2,F11R,HBZ,HDAC6,HMGB1,HNRNPM,HSP90AB1,IFITM3,IGKC,IL16,ILF3,IRF6,KIF11,MAN2B1,MAP2K3,MAPK1,MGAT1,MMP9,MVP,MX1,NCL,NFKB1,NPM1,NRBP1,NUDCD3,NUP205,NUP62,NXF1,OAS3,OPTN,PAK2,PI4KA,PLIN3,PML,POLR2A,PRKCD,PSIP1,PTK2B,PTPN1,RAB11B,RACGAP1,RELA,RPL13A,RPL35,SAFB,SEC14L2,SERPINA1,SF3A1,SF3B6,SNRPF,SON,SQSTM1,SRSF1,STXBP2,TAP1,T…	72
Cellular Movement	Migration of cells	1.23e-11	Increased	5.919	ACSL4,ADGRE5,AHNAK,AIMP1,ALDOA,ANXA2,ANXA5,APOA1,APOE,ARG1,ARHGEF16,ATG16L1,ATG3,AZU1,BAX,BCAM,BCAT1,BMX,BST1,C2,C5,C6,CAMK2D,CAPG,CAPN2,CAPNS1,CARMIL1,CAT,CD58,CD63,CD74,CENPF,CFL1,CNN2,CNN3,CNP,COL18A1,COL3A1,COL4A1,COL4A2,COL4A3,COL6A1,CORO1A,CPB2,CRIP2,CRKL,CRP,CSK,CSNK2B,CSPG4,CTSH,CTSS,CTTN,CUL4A,DCLK1,DEK,DICER1,DNMT1,DOCK2,DPT,DPYSL3,ECM1,EFEMP1,EHD1,EIF2AK2,ELANE,ELP3,ENPP1,EPHX2,EPPK1,E…	226
Cancer,Hematological Disease,Organismal Injury and Abnormalities	Hematologic cancer of cells	1.47e-11		-0.851	AASS,ABAT,ACAD11,ACOT9,ADAR,AGL,AHNAK,AIMP1,ANXA2,ANXA4,ARHGAP17,B2M,BAG2,BAX,BCAT1,BCLAF1,BUB3,C7,CAD,CASP3,CD58,CD63,CD74,CDC37L1,CFL1,CHD4,CNP,COL12A1,COL18A1,COL3A1,COL4A1,COL4A2,COL6A1,COL6A2,COPS4,CPSF7,CRKL,CRP,CSK,CSNK2B,CTSH,CTTN,CYP4F11,DES,DICER1,DMGDH,DNMT1,DOCK2,DPT,EHD1,EIF2A,ENPP1,F10,F11R,F2,FAM129B,FEN1,FLG2,FN1,FTCD,FUBP1,FUS,GBP2,GOT2,GPD2,GRB2,GSN,GTF2I,HAO2,HCLS1,HDAC6,HIP1,H…	192
Cancer,Organismal Injury and Abnormalities	Neoplasia of cells	1.51e-11		0.622	AASS,ABAT,ACAD11,ACOT9,ACOX2,ACSL4,ACSM2A,ACSM3,ACSM5,ADAR,ADD3,ADH1B,AGL,AGR2,AGR3,AHNAK,AHNAK2,AIMP1,AKAP2,ALDH1B1,ALDH1L1,AMDHD2,ANAPC1,ANLN,ANP32A,ANP32B,ANXA2,ANXA4,ANXA5,APOE,ARAP1,ARHGAP17,ARHGEF16,ASNA1,ASPN,ATXN2L,AZU1,B2M,BAG2,BAX,BCAT1,BCLAF1,BCS1L,BHMT,BLVRA,BMX,BST1,BTBD18,BUB3,C5,C6,C7,CACYBP,CAD,CAP2,CAPN2,CAPN5,CASP3,CAT,CCDC88B,CD58,CD59,CD63,CD74,CDC37,CDC37L1,CDC5L,CENPF,CFL1,C…	460
Cellular Assembly and Organization	Development of cytoplasm	1.53e-11	Increased	2.536	ABCD1,ACTR2,AIMP1,AKAP2,APOA1,APOE,ARAP1,ATG16L1,ATG3,BAX,BMX,CARMIL1,CD74,CENPF,CFL1,CNP,COL18A1,CORO1A,CTTN,CUL3,DBNL,DPYSL3,EHD4,EIF2A,EML2,F2,FLNA,FN1,GDI1,GRB2,GSN,HCLS1,HDAC6,HIP1,ICAM1,IPO9,KANK2,LETM1,LMCD1,MALSU1,MAPK1,MAPRE1,MRPL14,MYL9,NCKAP1,NPM1,PALLD,PDCD10,PES1,PFDN5,PFN1,PKN2,PPM1F,PRKCD,PTK2B,RAB1A,RBBP4,RHOB,RHOC,S100A10,SIRT1,SRC,STMN1,TGFBI,THBS1,THY1,TNC,TPM2,TPM3,TUBB,U2AF2,…	75
Cancer,Gastrointestinal Disease,Hepatic System Disease,Organismal Injury and Abnormalities	Liver carcinoma	1.79e-11		1.164	AASS,ABAT,ABCF2,ACAA1,ACAA2,ACACB,ACADSB,ACOT7,ACOX2,ACSL1,ACSM3,ACTR2,ADAR,ADH1B,ADRM1,AEBP1,AGRN,AGXT2,AHNAK,AHNAK2,AKR1B10,ALDH2,ALDH8A1,AMT,ANLN,ANP32B,ANP32E,ANXA2,ANXA5,AP1M1,AP3D1,API5,APIP,APOE,ARAP1,ARG1,ARHGAP10,ARHGAP17,ARPC5,ASNA1,ASPN,ASS1,ATG16L1,ATXN2L,B2M,BAG2,BAG6,BAX,BCAT1,BCLAF1,BCS1L,BDH1,BHMT,BLVRA,C5,C7,CACYBP,CAD,CAMK2D,CAP2,CAPG,CAT,CBX3,CBX8,CD58,CDC37L1,CELF1,CENPF,CFL2,…	380
Amino Acid Metabolism,Small Molecule Biochemistry	Synthesis of amino acids	2.78e-11		-1.473	ABAT,AGXT2,ARG1,ASPG,ASS1,BCAT1,BHMT,BHMT2,CTH,GLS,GLUD1,GLYAT,GOT2,GPT,ME2,MTHFD1,PAH,PKM,PSPH,SARDH,SHMT1,UPB1,VCAN	23
Cancer,Organismal Injury and Abnormalities,Reproductive System Disease	Female genital neoplasm	3.01e-11			AASS,ABAT,ABCD1,ABCF2,ACACB,ACAD11,ACADM,ACADS,ACADSB,ACOX2,ACSL1,ACSL4,ACSM3,ACTR2,ADD3,ADGRE5,ADH1B,AEBP1,AGL,AGPS,AGR2,AGR3,AGXT2,AHCYL1,AHNAK,AHNAK2,AKAP2,ALDH1B1,ALDH1L1,ALDH8A1,ALDOA,ALYREF,ANLN,ANP32B,ANP32E,ANXA2,ANXA5,AP3D1,APIP,APOA1,APOA4,APOE,ASPN,ATG16L1,AUH,B2M,BAG6,BCAT1,BCLAF1,BDH1,BMX,BST1,C5,C6,C7,C8B,CAD,CAP2,CAPN2,CAPN5,CASK,CCDC88B,CD2AP,CD74,CDC25C,CELF1,CENPF,CHD4,CLIC1,CNN…	387
Cellular Assembly and Organization,Cellular Function and Maintenance	Organization of cytoskeleton	3.17e-11	Increased	4.724	ACTR2,AGRN,AHNAK,AKAP2,ALDOA,ANP32A,APOE,ARAP1,ARHGAP10,ARHGAP17,ARPC5,BAX,BCCIP,BMX,BST1,C5,CAP2,CAPG,CAPN2,CAPNS1,CAPRIN1,CARMIL1,CASP3,CD2AP,CENPF,CFL1,CFL2,CHP1,CKB,CNN2,CNP,CORO1A,CRIP1,CRKL,CROCC,CSK,CSRP1,CTSS,CTTN,DBNL,DCLK1,DES,DICER1,DOCK2,DPYSL3,EHD1,EIF4G2,EML2,EPB41,EPHX2,EPPK1,EPS8,ERBIN,ESPN,F2,FLNA,FLNB,FN1,FTCD,GAN,GDI1,GMFG,GSN,HDAC6,HMGB1,HMGB2,HNF4A,HNRNPK,HSP90AB1,HSPB1,ICAM1…	163
Infectious Diseases	Infection by HIV-1	3.3e-11	Increased	5.162	AASS,ACACB,ACADSB,ADGRE5,AES,AMDHD2,ATOX1,BAG6,BCLAF1,CAD,CD74,CLNS1A,CLTA,COG2,COL5A1,DHX9,DIMT1,EIF2B5,EIF3H,EPS8,EXOSC10,FNTA,FXR1,GOSR2,GPD2,HGS,HMGB1,HNRNPH1,HNRNPU,KHDRBS1,MAP4,MDN1,MGAT1,MMP9,MRC1,MRE11,MRPL44,NCKAP1,NFKB1,NIPSNAP2,NMT1,NRBP1,NUP107,NUP133,NUP155,NUP62,NXF1,PCK1,PFKM,PGM1,PI4KA,PKN2,PLOD3,POLR2A,PRPF6,PSIP1,RAB6C/RAB6D,RAD21,RANBP1,RBM25,RELA,RPS6KA3,RSL1D1,SF3A1,SF3B2,SFX…	82
Cellular Movement,Embryonic Development	Cell movement of embryonic cell lines	3.33e-11	Increased	2.898	APOA1,ATG3,CENPF,CNN3,COL18A1,CRKL,CSK,CTTN,EFEMP1,EHD1,F10,F2,FBLN2,FGA,FLNA,FN1,HARS,HDAC6,ICAM1,IKZF1,ITGA2,ITGAM,MAPK14,NARS,NFKB1,PALLD,POSTN,PPIF,PTBP1,RELA,RHOC,RHOG,SRC,SRSF1,TNC,VIM	36
Cancer,Organismal Injury and Abnormalities	Development of adenocarcinoma	3.44e-11		-1.283	AASS,ABCD1,ABCF2,ABHD11,ACACB,ACAD11,ACADM,ACADS,ACADSB,ACOT7,ACOX2,ACSL1,ACSL4,ACSM3,ACTR2,ADD3,ADH1C,AEBP1,AGL,AGPS,AGRN,AGXT2,AHCYL1,AHNAK,AHNAK2,AKAP2,ALDH1B1,ALDH1L1,ALDH8A1,ALDOA,ANAPC1,ANLN,ANP32A,ANP32B,ANP32E,ANXA2,ANXA5,AP3D1,APIP,APOE,ASPN,ATG16L1,ATXN2L,AUH,B2M,BAG6,BAX,BCAT1,BCCIP,BCKDHA,BCLAF1,BDH1,BMX,BST1,C2,C5,C6,C7,C8B,CAD,CAP2,CAPN2,CAPN5,CAPRIN1,CASK,CBX8,CCDC88B,CD74,CENPF,CH…	415
Cellular Function and Maintenance	Endocytosis	3.93e-11	Increased	2.894	ANXA5,APOA1,APOC2,APOE,B2M,BMX,C5,CAPG,CARMIL1,CD2AP,CD63,CDC5L,CKB,CNN2,CORO1A,CRP,CSK,CTTN,DOCK2,EHD1,EHD4,EIF2AK2,EPS8,FCN1,FLNA,GRB2,GSN,HGS,HIP1,HMGB1,HNRNPK,HSPG2,ICAM1,IFITM3,IGHV3-33,IGKC,IGLV3-21,ITGAM,ITGAV,ITSN2,JCHAIN,LCN2,MAPK1,MAPK14,MAPK3,MBL2,MFGE8,MMP9,MRC1,MYH9,MYO6,NAE1,NCL,NEDD4L,NPC1,NPM1,PALLD,PDLIM7,PFN1,PKN2,PRKCD,PTPN1,RAB1A,RAB21,RAB31,RHOB,RHOG,S100A10,SF3B4,SNX12,SNX5,…	78
Cancer,Organismal Injury and Abnormalities,Reproductive System Disease	Tumorigenesis of reproductive tract	5.59e-11			AASS,ABAT,ABCD1,ABCF2,ACACB,ACAD11,ACADM,ACADS,ACADSB,ACOX2,ACSL1,ACSL4,ACSM3,ACTR2,ADD3,ADGRE5,ADH1B,AEBP1,AGL,AGPS,AGR2,AGR3,AGXT2,AHCYL1,AHNAK,AHNAK2,AKAP2,ALDH1B1,ALDH1L1,ALDH8A1,ALDOA,ALYREF,ANLN,ANP32B,ANP32E,ANXA2,ANXA5,AP3D1,APIP,APOA1,APOA4,APOE,ASPN,ATG16L1,AUH,B2M,BAG6,BCAT1,BCLAF1,BDH1,BMX,BST1,C5,C6,C7,C8B,CAD,CAP2,CAPN2,CAPN5,CASK,CCDC88B,CD2AP,CD74,CELF1,CENPF,CHD4,CLIC1,CNN1,CNP,C…	385
Connective Tissue Disorders,Inflammatory Disease,Organismal Injury and Abnormalities,Skeletal and Muscular Disorders	Rheumatic Disease	6.83e-11		1.254	ACADM,ACOT9,ACOX2,ACSL1,ACSL4,ACSL5,ACTL6A,ADAR,ADGRE5,ADSS,ALDH2,ALDOA,APOA1,APOE,ARG1,ARPC5,ASPN,AZU1,B2M,BAG6,BAX,BHMT,BMX,C2,C5,C6,CAMK2D,CAPN2,CASP3,CD59,CD74,COL3A1,COL4A2,CRP,CSK,CTR9,CTSS,DEK,DNMT1,EEF1E1,EEF1G,EHD4,EIF2AK2,ELANE,EPHX2,F10,F11R,FABP5,FCN1,FGA,FGB,FGG,FKBP5,FMOD,FN1,FUBP1,GALNT2,GAR1,GBP2,GCA,GNB2,GNL1,GSN,HCLS1,HMGB1,HNRNPA1,HNRNPA3,HSPB8,HSPG2,ICAM1,IGFBP7,IGKC,IKZF1,IL1…	149
Cellular Movement	Cell movement of tumor cell lines	7.78e-11	Increased	5.969	ACSL4,ADGRE5,AGR2,AHNAK,ANXA2,ARHGEF16,BCAM,C5,CAPN2,CAPNS1,CAT,CNN1,COL18A1,COL4A3,CRKL,CSK,CSNK2B,CTSH,CTTN,CUL4A,DNMT1,DOCK2,ECM1,EFEMP1,EIF2AK2,ELANE,ENPP1,EPS8,F11R,F2,FAM120A,FBLN2,FBLN5,FGA,FLNA,FLNB,FN1,GALNT2,GBP2,GDI1,GMFG,GNB2,GRB2,HDAC6,HMGA1,HMGB1,HNRNPA2B1,HNRNPK,IFITM3,IGFBP7,ILF3,IPO7,ITGA2,ITGAV,KHDRBS1,LAMA5,LCN2,LIMA1,LMCD1,LMNA,MAP4,MAPK1,MAPK14,MAPK3,MARCKS,MMP9,MX1,MYH9,NCL,…	127
RNA Damage and Repair	Metabolism of RNA	7.8e-11			AUH,DCPS,HNRNPA0,HNRNPA1,HNRNPA2B1,HNRNPA3,HNRNPC,HNRNPD,HNRNPH1,HNRNPH2,HNRNPK,HNRNPM,HNRNPR,HNRNPU,KHSRP,NCBP1,PCBP1,POLR2A,POLR2B,PTBP1,RBMX,ZC3H12D	22
Molecular Transport	Export of molecule	1.04e-10		1.412	ACSL1,AEBP1,AHCYL1,ALYREF,APOA1,APOA4,APOC2,APOE,ATOX1,CHP1,CNP,CTSS,CUL3,DDX39A,F2,HNRNPA2B1,KHDRBS1,LETM1,MAP2K3,MAPK1,MVP,NCBP1,NCEH1,NME2,NPC1,NUP107,NUP133,NUP155,NUP205,NUP210,NUP35,NUP37,NUP43,NUP62,NUP93,NXF1,PARP1,RAN,RBM8A,SIRT1,SLC12A2,SRSF1,SRSF2,SRSF3,SRSF5,SRSF6,SRSF7,SRSF9,TPR,U2AF1/U2AF1L5,U2AF2	51
Cancer,Hematological Disease,Immunological Disease,Organismal Injury and Abnormalities	Lymphoma	1.04e-10		-0.959	AASS,ABAT,ADAR,AHNAK,AIMP1,ANXA2,ANXA4,ARHGAP17,B2M,BAG2,BAX,BCAT1,BCLAF1,BUB3,C7,CAD,CASP3,CD58,CD63,CD74,CHD4,CNP,COL12A1,COL18A1,COL3A1,COL4A1,COL4A2,COL6A1,COL6A2,CPSF7,CRKL,CRP,CTSH,DES,DICER1,DNMT1,DOCK2,DPT,EHD1,EIF2A,F10,F11R,FEN1,FN1,FTCD,FUBP1,FUS,GBP2,GOT2,GPD2,GRB2,GSN,GTF2I,HAO2,HCLS1,HDAC6,HIP1,HIST1H1C,HMGA1,HMGB1,HNRNPM,HNRNPU,HSP90AB1,ICAM1,IDH3A,IFI30,IGFBP7,IGKC,IGLL1/IGLL5,IKZ…	155
Cellular Movement,Embryonic Development	Migration of embryonic cell lines	1.11e-10	Increased	2.417	ATG3,CENPF,CNN3,COL18A1,CRKL,CSK,CTTN,EFEMP1,EHD1,F10,F2,FBLN2,FGA,FN1,HARS,HDAC6,ICAM1,IKZF1,ITGA2,ITGAM,MAPK14,NARS,NFKB1,PALLD,POSTN,PPIF,RELA,RHOC,RHOG,SRC	30
Cancer,Organismal Injury and Abnormalities,Reproductive System Disease	Female genital tract cancer	2.14e-10			AASS,ABAT,ABCD1,ABCF2,ACACB,ACAD11,ACADM,ACADS,ACADSB,ACOX2,ACSL1,ACSL4,ACSM3,ACTR2,ADD3,ADH1B,AEBP1,AGL,AGPS,AGR2,AGR3,AGXT2,AHCYL1,AHNAK,AHNAK2,AKAP2,ALDH1B1,ALDH1L1,ALDH8A1,ANLN,ANP32B,ANP32E,ANXA2,ANXA5,AP3D1,APIP,APOA1,APOA4,APOE,ASPN,ATG16L1,AUH,B2M,BAG6,BCAT1,BCLAF1,BDH1,BMX,BST1,C5,C6,C7,C8B,CAD,CAP2,CAPN2,CAPN5,CASK,CCDC88B,CD2AP,CD74,CDC25C,CELF1,CENPF,CHD4,CLIC1,CNN1,COL12A1,COL18A1,CO…	372
Cell Cycle	Mitosis	2.17e-10		0.378	ACSM5,ANLN,APOE,BCCIP,BUB3,C5,CAPN2,CDC25C,CDC5L,CENPF,CHD4,CHMP4B,CSNK2B,CUL3,DCLK1,DHX9,DICER1,EPS8,F2,GBF1,GRB2,HAUS1,HNF4A,HNRNPU,ITGAL,KIF11,LAMTOR5,MAPK1,MAPK14,MAPK3,MARCKS,MECP2,MKI67,MRE11,MYBBP1A,NAE1,NUDCD3,NUP62,PAK2,PDLIM7,PKN2,PPP1CA,PPP1R12A,PPP5C,PRKCD,PRMT5,PRPF4,PTK2B,RAB6C/RAB6D,RACGAP1,RAD21,RAN,RIC8A,RPA3,RPS6KA3,RPS6KB1,SDCBP,SEPT9,SIRT1,SRC,STMN1,TCERG1,THBS1,TNC,TOP2B,TP53…	70
Cancer,Organismal Injury and Abnormalities	Secondary tumor	2.28e-10	Increased	2.394	ABAT,ADAR,ADGRE5,AGR2,ANXA2,ANXA5,APOA1,APOE,ARG1,B2M,C5,CAPG,CAPN2,CASP3,CAT,CD59,CNN1,COL18A1,COL4A1,COL4A2,COL6A3,CTSH,CTTN,CUL4A,DICER1,DNMT1,DPYSL3,EFEMP1,ELANE,ELP3,F10,F2,FABP5,FAM120A,FGG,FLNA,FN1,FUS,G3BP2,GYG2,HCLS1,HDAC6,HIST1H1C,HMGA1,HMGB1,HMGB2,HNRNPM,HSP90AB1,ICAM1,IFI30,IFITM3,IGFBP7,IKZF1,ITGA2,ITGAL,ITGAV,KHDRBS1,LAMA5,LCN2,LGALS4,LMCD1,LTF,LUC7L2,MAP2K3,MAP4,MAPK1,MLPH,MMP9,MRE…	119
Cancer,Gastrointestinal Disease,Organismal Injury and Abnormalities	Development of digestive organ tumor	2.44e-10		-0.206	AASS,ABCF2,ACACB,ACOT7,ACOT9,ADAR,ADD3,ADH1B,AEBP1,AGL,AGRN,AHNAK,AHNAK2,AKAP2,AKR1B10,ALDH1B1,ALDH1L1,ALDH2,ALDH8A1,ALDOA,AMT,ANAPC1,ANLN,ANXA4,AP3D1,API5,APIP,APOA4,APOE,ARAP1,ARHGAP10,ARHGEF16,ARMC8,ASPG,ASS1,ATG16L1,ATG3,ATXN2L,B2M,BAG6,BAX,BCAM,BCKDHA,BCKDK,BHMT,BMX,BST1,C2,C6,C7,C8B,C8G,CACYBP,CAD,CAPN5,CAPRIN1,CASK,CASP3,CAT,CBX3,CCDC88B,CD2AP,CD58,CDC25C,CDC5L,CENPF,CHD4,CIRBP,CKB,CLPTM1L…	431
Dermatological Diseases and Conditions,Inflammatory Disease,Organismal Injury and Abnormalities,Skeletal and Muscular Disorders	Juvenile dermatomyositis	2.63e-10			ASPN,CFL1,CNN3,COL3A1,COL4A1,COL4A2,COL5A1,COL6A1,COL6A2,COL6A3,IFI30,S100A11,SDCBP,SERPINH1,TAX1BP3,TGFBI,TUBB2A	17
Amino Acid Metabolism,Small Molecule Biochemistry	Synthesis of alpha-amino acid	2.72e-10		-1.129	AGXT2,ARG1,BCAT1,BHMT,BHMT2,CTH,GLS,GLUD1,GOT2,GPT,MTHFD1,PKM,PSPH,SARDH,SHMT1,VCAN	16
Infectious Diseases	HIV infection	2.76e-10	Increased	5.476	AASS,ACACB,ACADSB,ADGRE5,AES,AMDHD2,ANXA2,APOA1,ATOX1,B2M,BAG6,BCLAF1,C2,C5,CAD,CD74,CLNS1A,CLTA,COG2,COL5A1,CRP,DHX9,DIMT1,EIF2B5,EIF3H,ELANE,EPS8,EXOSC10,FN1,FNTA,FXR1,GOSR2,GPD2,HGS,HMGB1,HNRNPH1,HNRNPU,KHDRBS1,MAP4,MDN1,MGAT1,MMP9,MRC1,MRE11,MRPL44,NCKAP1,NFKB1,NIPSNAP2,NMT1,NRBP1,NUP107,NUP133,NUP155,NUP62,NXF1,PCK1,PFKM,PGM1,PI4KA,PKN2,PLOD3,POLR2A,PRPF6,PSIP1,RAB6C/RAB6D,RAD21,RANBP1,RBM25…	91
Cancer,Organismal Injury and Abnormalities,Reproductive System Disease	Uterine tumor	3.73e-10			AASS,ABAT,ABCD1,ACACB,ACADM,ACADSB,ACOX2,ACSL1,ACSL4,ACSM3,ADD3,ADGRE5,ADH1B,AGPS,AGXT2,AHCYL1,AHNAK,AHNAK2,ALDH1B1,ALDH1L1,ALDH8A1,ALDOA,ALYREF,ANP32B,ANP32E,ANXA2,ANXA5,AP3D1,APOA4,ASPN,ATG16L1,B2M,BAG6,BCAT1,BDH1,BMX,BST1,C6,C7,C8B,CAD,CAP2,CAPN2,CAPN5,CASK,CCDC88B,CD2AP,CD74,CELF1,CENPF,CHD4,CNN1,CNP,COL12A1,COL3A1,COL4A2,COL5A1,COL6A3,COPS4,CPS1,CRP,CSNK2B,CSPG4,CTH,CTPS1,CTSH,CTSS,CYP4F2,DB…	307
Cancer,Gastrointestinal Disease,Organismal Injury and Abnormalities	Colon cancer	4.22e-10			ABCF2,ACACB,ACOT7,ACOT9,ADAR,ADD3,AEBP1,AGL,AGR3,AGRN,AHNAK2,AKAP2,AKR1B10,ALDH1B1,ALDH1L1,ALDH2,ALDH8A1,ALDOA,ANAPC1,ANXA4,AP3D1,API5,APIP,APOA4,ARAP1,ARHGAP10,ARHGEF16,ASPG,ASS1,ATG16L1,ATG3,ATXN2L,B2M,BAG6,BAX,BCAM,BCKDK,BMX,BST1,BYSL,C2,C8G,CACYBP,CAD,CAPN5,CAPRIN1,CASK,CASP3,CAT,CBX3,CCDC88B,CD2AP,CD58,CDC25C,CDC5L,CENPF,CHD4,CIRBP,CLPTM1L,CNP,COG2,COL12A1,COL18A1,COL3A1,COL4A2,COL4A3,COL5A1…	384
Cancer,Organismal Injury and Abnormalities	Advanced malignant tumor	4.35e-10	Increased	2.394	ABAT,ADAR,ADGRE5,AGR2,ANXA2,ANXA5,APOA1,APOE,ARG1,B2M,C5,CAPG,CAPN2,CASP3,CAT,CD59,CD74,CNN1,COL18A1,COL4A1,COL4A2,COL6A3,CSK,CTSH,CTTN,CUL4A,DICER1,DNMT1,DPYSL3,EFEMP1,ELANE,ELP3,F10,F2,FABP5,FAM120A,FGG,FLNA,FN1,FUS,G3BP2,GYG2,HCLS1,HDAC6,HIST1H1C,HMGA1,HMGB1,HMGB2,HNRNPM,HSD11B1,HSP90AB1,ICAM1,IFI30,IFITM3,IGFBP7,IKZF1,IL16,ITGA2,ITGAL,ITGAV,KHDRBS1,LAMA5,LCN2,LGALS4,LMCD1,LTF,LUC7L2,MAP2K3,MA…	127
Cellular Movement,Hematological System Development and Function,Immune Cell Trafficking,Inflammatory Response	Cell movement of macrophages	4.68e-10		1.605	APOA1,APOE,ARG1,AZU1,C5,C6,CD74,CNN2,CNP,COL4A3,CRKL,DICER1,DOCK2,F2,FCN1,FLNA,FN1,GBA,GSN,HMGB1,ICAM1,IL16,IRF6,ITGAL,ITGAM,LMNB1,MAPK14,MAPK3,MMP9,NDRG1,NPC1,NPM1,NQO1,PARP1,PFN1,PRKCD,PTK2B,PTPN1,RHOB,RPL13A,S100A10,SIRT1,SOD3,THBS1,THBS2,VASP,VCAN,YBX1	48
Hereditary Disorder,Organismal Injury and Abnormalities,Skeletal and Muscular Disorders	Hereditary myopathy	4.78e-10			ADH1C,AHNAK,AKR1B10,APOA1,ASPN,BCS1L,CFL1,CFL2,CNN3,COL12A1,COL3A1,COL4A1,COL4A2,COL5A1,COL6A1,COL6A2,COL6A3,COL8A1,CTSS,DES,DPT,DSC2,ECHS1,EMD,ERLIN1,ETFDH,F10,FBLN5,FECH,FN1,FUS,FXR1,GAN,GARS,GFPT1,GOSR2,GSN,GYG1,GYG2,HARS,HDAC6,HNRNPA1,HNRNPA2B1,HSPB1,HSPB8,IFI30,ISCU,LAMA4,LBP,LMNA,NDRG1,NT5C2,NUP155,PABPN1,PDK3,PDLIM3,PPCS,PUS1,S100A11,SDCBP,SDHA,SEPT9,SERPINH1,SOD3,SQSTM1,SUN2,SYNE1,TAX1BP3…	79
Cellular Movement,Connective Tissue Development and Function	Cell movement of fibroblast cell lines	4.91e-10	Increased	3.25	ACTR2,ATG3,CENPF,CNN3,COL6A1,CRKL,CSK,CTTN,EFEMP1,EHD1,F2,FABP5,FLNA,FN1,GBP2,GRB2,HMGB1,IPO9,LIMA1,MAPK14,MAPRE1,MMP9,NPM1,PALLD,PPIF,PRKCD,PTBP1,PTPN1,RELA,RHOC,RHOG,RTN4,SRC,THBS1,TJP1,TNC,VIM	37
Cellular Assembly and Organization	Organization of organelle	5.22e-10		-0.543	ABCD1,AGRN,AKAP2,ALDOA,ANXA2,APOE,ARAP1,ARHGAP17,BAX,BCS1L,CARMIL1,CD2AP,CENPF,CFL1,CFL2,CHMP4B,CHP1,CNP,COG2,COL3A1,COL5A1,CORO1A,CSK,DES,DPT,EMD,EPB41,EPPK1,FLNA,FN1,GBA,GBF1,GSN,HDAC6,HEXB,HIST1H1B,HSP90AB1,HTRA2,KIF1BP,LEMD2,LIMA1,LMNA,LMNB2,MAPK14,MAPRE1,MECP2,MRE11,MYH9,NIPSNAP2,NPM1,NUP133,NUP155,NUP93,OPTN,PALLD,PARP1,PES1,PLOD3,PTK2B,RAB1A,RAB8B,RBBP4,RELA,RHOB,RHOC,RPA1,SAFB,SEC23IP,SEP…	82
Cell-To-Cell Signaling and Interaction,Hair and Skin Development and Function	Binding of epithelial cell lines	5.26e-10		1.65	ANXA2,ANXA5,BST1,F10,FGA,FGG,FN1,GRB2,ICAM1,ITGA2,ITGAM,ITGAV,PNN,POSTN,PRMT5,PTPN1,RRAS,SRC,TIMP1	19
Cancer,Organismal Injury and Abnormalities,Renal and Urological Disease	Bladder cancer	5.3e-10			AADAT,ACACB,ACADS,ACOX2,AEBP1,AGL,AHNAK,AHNAK2,AP3D1,ATXN2L,BCKDHA,BCLAF1,C8G,CASP3,CDC25C,CDC37,CENPF,CFL2,COL6A2,COL6A3,COPS4,CPS1,CRP,CSK,DHX9,DOCK2,ECM1,EPB41,EPPK1,EPS15L1,F11R,FAM120A,FBLN5,FCN1,FGA,FGGY,FLAD1,FN1,FYCO1,GAR1,GEMIN8,GRHPR,H2AFY,HCLS1,HGS,HIST1H1C,HMGB2,HNRNPA2B1,HSD17B7,HSP90AB1,HSPB1,HSPB6,HSPB8,HSPG2,ICAM1,IKZF1,ILF3,ITGAV,KYNU,LAMA4,LAMC1,LDHD,MAPK1,MCM2,MFGE8,MKI67,MMAA,…	134
Cellular Assembly and Organization	Formation of cytoskeleton	5.46e-10	Increased	3.003	ACTR2,AIMP1,AKAP2,APOA1,ARAP1,BMX,CARMIL1,CENPF,CFL1,CNP,COL18A1,CORO1A,CTTN,CUL3,DBNL,DPYSL3,EML2,F2,FLNA,FN1,GDI1,GRB2,GSN,HCLS1,HDAC6,HIP1,ICAM1,KANK2,LMCD1,MAPK1,MAPRE1,MYL9,NCKAP1,NPM1,PALLD,PDCD10,PFDN5,PFN1,PKN2,PPM1F,PRKCD,PTK2B,RBBP4,RHOB,RHOC,S100A10,SRC,STMN1,TGFBI,THBS1,THY1,TNC,TPM2,TPM3,TUBB,U2AF2,UBAP2L,VASP,WASF2,ZYX	60
Cancer,Gastrointestinal Disease,Organismal Injury and Abnormalities	Colon tumor	5.57e-10		0.445	ABCF2,ACACB,ACOT7,ACOT9,ADAR,ADD3,AEBP1,AGL,AGR3,AGRN,AHNAK2,AKAP2,AKR1B10,ALDH1B1,ALDH1L1,ALDH2,ALDH8A1,ALDOA,ALYREF,ANAPC1,ANXA4,AP3D1,API5,APIP,APOA4,ARAP1,ARHGAP10,ARHGEF16,ASPG,ASS1,ATG16L1,ATG3,ATXN2L,B2M,BAG6,BAX,BCAM,BCKDK,BMX,BST1,BYSL,C2,C8G,CACYBP,CAD,CAPN5,CAPRIN1,CASK,CASP3,CAT,CBX3,CCDC88B,CD2AP,CD58,CDC25C,CDC5L,CENPF,CHD4,CIRBP,CLPTM1L,CNN1,CNP,COG2,COL12A1,COL18A1,COL3A1,COL4A2,C…	387
Cellular Movement,Hematological System Development and Function,Immune Cell Trafficking,Inflammatory Response	Cell movement of phagocytes	5.96e-10	Increased	2.101	ANXA2,APOA1,APOE,ARG1,AZU1,BST1,C2,C5,C6,CAPG,CD58,CD74,CNN2,CNP,COL4A1,COL4A3,CORO1A,CRKL,CRP,CTSS,CTTN,DEK,DICER1,DOCK2,ELANE,EPHX2,EPS8,F10,F11R,F2,FCN1,FLNA,FN1,GBA,GBF1,GSN,HARS,HCLS1,HMGB1,HSPB1,ICAM1,IL16,IRF6,ITGAL,ITGAM,ITGAV,LBP,LCN2,LMNB1,LSP1,MAPK14,MAPK3,MMP9,NARS,NDRG1,NPC1,NPM1,NQO1,PARP1,PFN1,PRKCD,PTK2B,PTPN1,RAB27A,RELA,RHOB,RPL13A,RTN4,S100A10,SERPINA1,SIRT1,SOD3,THBS1,THBS2,TI…	79
Cancer,Organismal Injury and Abnormalities	Extraadrenal retroperitoneal tumor	5.96e-10		-0.246	ABHD11,ACACB,ACADS,ACOT7,ACOX2,ACSM5,ACTBL2,ADAR,AGL,AGR2,AGXT2,AHNAK,AHNAK2,AKAP2,ALDOA,ALYREF,ANLN,ANP32A,ANP32E,ANXA2,ANXA5,AP3D1,API5,ASPN,ATG16L1,ATPAF2,ATXN2L,AUP1,B2M,BAX,BST1,C2,C5,C5orf51,C8G,CAD,CAPN2,CASP3,CD59,CD63,CD74,CENPF,CHD4,COL12A1,COL18A1,COL4A1,COL4A3,COL5A1,COL6A1,COL6A3,COL8A1,CPB2,CPN2,CRP,CSPG4,CTH,CTNNBL1,CTR9,CTSS,CTTN,CYP4F11,CYP4F2,DCLK1,DCPS,DDX59,DHX9,DICER1,DNAJC10…	311
Cancer,Organismal Injury and Abnormalities	Cancer of cells	6.14e-10		0.64	AASS,ABAT,ACAD11,ACOT9,ACOX2,ACSL4,ACSM5,ADAR,ADD3,ADH1B,AGL,AGR2,AHNAK,AHNAK2,AIMP1,AKAP2,ALDH1L1,AMDHD2,ANLN,ANP32A,ANP32B,ANXA2,ANXA4,ARAP1,ARHGAP17,ARHGEF16,ASPN,ATXN2L,B2M,BAG2,BAX,BCAT1,BCLAF1,BCS1L,BLVRA,BST1,BTBD18,BUB3,C6,C7,CAD,CAP2,CAPN2,CAPN5,CASP3,CAT,CCDC88B,CD58,CD59,CD63,CD74,CDC37,CDC37L1,CDC5L,CENPF,CFL1,CFL2,CHD4,CNN1,CNN2,CNP,COL12A1,COL18A1,COL3A1,COL4A1,COL4A2,COL5A1,COL6A1,…	386
Cancer,Organismal Injury and Abnormalities	Genitourinary adenocarcinoma	6.28e-10		1	AADAT,AASS,ABAT,ABCD1,ABCF2,ABHD11,ACACB,ACAD11,ACADM,ACADS,ACADSB,ACOT7,ACOX2,ACSL1,ACSL4,ACSM3,ACTR2,ADAR,ADD3,ADH1B,AEBP1,AGL,AGPS,AGXT2,AHCYL1,AHNAK,AHNAK2,AKAP2,ALDH1B1,ALDH1L1,ALDH2,ALDH8A1,AMT,ANAPC1,ANLN,ANP32B,ANP32E,ANXA2,ANXA5,AP3D1,API5,APIP,APOE,ARF5,ARHGAP10,ASNA1,ASPG,ASPN,ATG16L1,ATXN2L,AUH,B2M,BAG6,BAX,BCAT1,BCCIP,BCKDHA,BCKDK,BCLAF1,BDH1,BMX,BST1,C2,C5,C5orf51,C6,C7,C8B,CAD,CAP2…	482
Cell-To-Cell Signaling and Interaction,Connective Tissue Development and Function	Binding of fibroblasts	6.72e-10	Increased	2.317	APOE,CSK,FN1,GSN,ICAM1,ITGAL,ITGAM,ITGAV,MRC2,MYH9,PML,POSTN,RELA,SRC,THBS2,THY1,TNC,VCAN,ZYX	19
Cellular Assembly and Organization	Quantity of filaments	7.56e-10		0.741	APOE,ARAP1,CFL1,COL18A1,COL5A1,COL6A3,CSK,EPB41,F2,FLNA,FLNB,FMOD,FN1,HSPG2,LIMA1,LMNA,MAP4,MARCKS,PRKCD,RBBP4,RELA,RHOB,RPS6KA3,SERPINH1,SLC9A3R2,SRC,STMN1,VIM	28
Cellular Movement	Cell movement of myeloid cells	7.59e-10	Increased	2.115	ANXA2,APOA1,APOE,ARG1,AZU1,BST1,C2,C5,C6,CAPG,CD74,CNN2,CNP,COL4A1,COL4A3,CORO1A,CRKL,CRP,CSK,CTSS,CTTN,DEK,DICER1,DOCK2,ELANE,EPHX2,F10,F11R,F2,FCN1,FLNA,FN1,GBA,GBF1,GSN,HARS,HMGB1,HSPB1,ICAM1,IL16,IRF6,ITGAL,ITGAM,ITGAV,LAMA5,LBP,LCN2,LMNB1,LSP1,LTF,MAPK14,MAPK3,MMP9,NDRG1,NPC1,NPM1,NQO1,PARP1,PFN1,PRKCD,PTK2B,PTPN1,RAB27A,RELA,RHOB,RPL13A,RTN4,S100A10,SERPINA1,SIRT1,SOD3,THBS1,THBS2,TIMP1,VAS…	78
Cancer,Hematological Disease,Immunological Disease,Organismal Injury and Abnormalities	B-cell neoplasm	7.82e-10		0.059	AASS,ACAD11,AGL,AHNAK,ANXA2,ANXA4,ANXA5,APOE,ARHGAP17,B2M,BAX,BCAT1,BCLAF1,BUB3,C7,CAD,CASP3,CAT,CD58,CD63,CD74,CDC37L1,CFL1,CHD4,CNP,COL12A1,COL18A1,COL3A1,COL4A2,COL6A1,CPSF7,CRP,CSK,CTTN,CYP4F11,DEK,DICER1,DMGDH,DNMT1,DOCK2,DPT,EHD1,EIF2A,ENPP1,F10,F11R,FAM129B,FEN1,FLG2,FLNA,FN1,FTCD,FUBP1,FUS,GBP2,GPD2,GRB2,GRHPR,GSN,GTF2I,HAO2,HCLS1,HDAC6,HIP1,HIST1H1C,HMGB1,HNRNPM,HNRNPU,HSP90AB1,HSPB1,ICA…	152
Cancer,Organismal Injury and Abnormalities	Lymphoreticular neoplasm	8.38e-10		-0.928	AASS,ABAT,ACSL4,ACSM2A,ACSM3,ADAR,AGR3,AHNAK,AHNAK2,AIMP1,AKAP2,ALDH1B1,ANAPC1,ANXA2,ANXA4,ARAP1,ARHGAP17,ASNA1,AZU1,B2M,BAG2,BAX,BCAT1,BCLAF1,BHMT,BUB3,C6,C7,CAD,CAPN2,CASP3,CD58,CD63,CD74,CENPF,CHD4,CNP,COL12A1,COL18A1,COL3A1,COL4A1,COL4A2,COL4A3,COL6A1,COL6A2,COL6A3,CORO1A,CPNE1,CPSF7,CRKL,CROCC,CRP,CSK,CSNK2B,CSPG4,CTSH,CYP4F11,DCTN3,DEK,DES,DHX9,DICER1,DNMT1,DOCK2,DPP3,DPT,EHBP1L1,EHD1,EIF2A…	264
Cancer,Organismal Injury and Abnormalities	Benign Tumors	9.44e-10		-0.38	ADGRE5,ADH1B,AEBP1,AGRN,AHCYL1,ALDH1B1,ALDH2,ALDOA,ANXA2,ANXA5,APOA1,ARG1,ASS1,BDH1,BHMT,BYSL,CAD,CNP,COL12A1,COL18A1,COL3A1,COL4A1,COL4A2,COL4A3,COL5A1,COL6A1,COL6A2,COL6A3,COL8A1,CRP,DCLK1,DDX17,DDX24,DICER1,DKC1,DNMT1,DPT,ENO3,EPPK1,ERBIN,EXOC2,FABP5,FBLN1,FLNA,FMOD,GRB2,HMGA1,HMGB1,HMGB2,HSP90AB1,IFITM3,IGFBP7,JCHAIN,KIF11,KPNA3,LCN2,LSP1,LTBP1,MAPK1,MAPK3,MKI67,MMP9,MYH9,MYL6,NDRG1,NDRG2,NFK…	104
Cancer,Cell Death and Survival,Organismal Injury and Abnormalities,Tumor Morphology	Cell death of osteosarcoma cells	1.18e-09	Decreased	-4.6	CHMP4B,EBNA1BP2,ISCU,NUP107,NUP155,NUP62,NXF1,PUF60,RAN,RBM39,RBM8A,RPA2,RPA3,RPL13A,RPL35,RPL37A,SF3A1,SF3B2,SF3B6,SMC1A,SNRPA1,SNRPD3,SON,U2AF2,UBE2I	25
Cancer,Organismal Injury and Abnormalities	Benign solid tumor	1.2e-09		-0.38	ADGRE5,ADH1B,AEBP1,AGRN,AHCYL1,ALDH1B1,ALDH2,ALDOA,ANXA2,ANXA5,APOA1,ARG1,ASS1,BDH1,BHMT,BYSL,CAD,CNP,COL12A1,COL18A1,COL3A1,COL4A1,COL4A2,COL4A3,COL5A1,COL6A1,COL6A2,COL6A3,COL8A1,CRP,DCLK1,DDX17,DDX24,DICER1,DKC1,DNMT1,DPT,ENO3,EPPK1,ERBIN,EXOC2,FABP5,FBLN1,FLNA,FMOD,GRB2,HMGA1,HMGB1,HMGB2,HSP90AB1,IFITM3,IGFBP7,JCHAIN,KIF11,KPNA3,LCN2,LSP1,LTBP1,MAPK1,MAPK3,MKI67,MMP9,MYH9,MYL6,NDRG1,NDRG2,NFK…	103
Cancer,Organismal Injury and Abnormalities,Respiratory Disease	Lung tumor	1.22e-09		0.07	ABCD1,ABHD11,ACOX2,ADAR,ADH1C,AGR2,AGRN,AHNAK,AHNAK2,AKR1B10,ALDH1B1,ALDH1L1,ALDH8A1,ALDOA,ALYREF,ANAPC1,ANP32A,ANXA2,APOA1,APOE,ARAP1,B2M,BAG6,BAX,BCCIP,BCKDHA,BCLAF1,BMX,BST1,C7,C8B,CAPRIN1,CASK,CASP3,CBX8,CENPF,CHMP4B,CKB,COL12A1,COL3A1,COL4A1,COL5A1,COL6A3,COPS6,CPNE1,CPS1,CRKL,CROCC,CRP,CSPG4,CSTA,CTH,CTNNBL1,CUL3,CUL4A,DCLK1,DDX17,DEK,DHX29,DICER1,DNMT1,DPP3,DPT,DPYSL3,EFEMP1,EHHADH,ELANE,E…	248
Cellular Movement,Hematological System Development and Function,Immune Cell Trafficking,Inflammatory Response	Cellular infiltration by phagocytes	1.31e-09		0.6	ANXA2,APOA1,APOE,ARG1,C2,C5,C6,CNP,COL4A3,DICER1,DOCK2,ELANE,EPHX2,F2,FCN1,GBA,HMGB1,HSPB1,ICAM1,IL16,IRF6,ITGAL,ITGAM,LBP,LCN2,LMNB1,MAPK14,MAPK3,MMP9,NDRG1,NPC1,NQO1,PARP1,PRKCD,PTK2B,PTPN1,RAB27A,RELA,RPL13A,S100A10,SERPINA1,SIRT1,SOD3,TIMP1,VASP,VWF,YBX1	47
Cardiovascular System Development and Function	Morphology of cardiovascular system	1.64e-09			ACACB,ACADM,ACSL1,ADH1C,APOE,BCAM,BMX,CAMK2D,CAPN2,CAPNS1,CASP3,CAT,CD2AP,CIAPIN1,CNN1,COL18A1,COL3A1,COL4A3,COL5A1,COL8A1,CRKL,CTTN,DES,DICER1,DNAJC3,DSC2,EHD3,EHD4,EIF2B5,EMD,ENPP1,ERBIN,F11R,F2,FBLN1,FBLN5,FLNA,FMOD,FN1,FUBP1,FXR1,G6PD,GBP2,GRB2,GSN,HIST1H1C,HMGB1,HSD17B7,HSPB8,HSPG2,HTRA2,IGFBP7,ITGA2,ITGAV,LAMA4,LCN2,LMCD1,LMNA,LTBP1,MAN2B1,MAP2K3,MAPK1,MAPK14,MAPK3,MGAT1,MMP9,MYH9,MYL9,NCST…	112
Cellular Movement	Cell movement of fibrosarcoma cell lines	1.79e-09	Increased	2.596	ADGRE5,AHNAK,BCAM,CAT,COL4A3,CTTN,EPS8,FBLN5,FLNA,FLNB,FN1,HNRNPK,S100A11,SEPT9,SLC9A3R2,TPM3	16
Cellular Movement	Migration of fibrosarcoma cell lines	1.98e-09	Increased	2.596	ADGRE5,AHNAK,BCAM,CAT,COL4A3,CTTN,FBLN5,FLNA,FLNB,FN1,HNRNPK,S100A11,SEPT9,SLC9A3R2,TPM3	15
Cellular Function and Maintenance	Engulfment of cells	2e-09	Increased	2.727	ANXA5,APOA1,APOE,ATG3,AZU1,BMX,C5,CAPG,CAT,CD63,CDC5L,CKB,CNN2,CORO1A,CRP,CSK,DOCK2,EHD1,EHD4,ELANE,EPS8,F10,FCN1,FLNA,FN1,GRB2,GSN,HGS,HIP1,HMGB1,ICAM1,ITGAM,ITGAV,LCN2,MAPK1,MAPK14,MBL2,MFGE8,MRC1,MYH9,NAE1,NCL,NEDD4L,NPM1,PALLD,PFN1,PKN2,PRKCD,PTPN1,RAB27A,RAB31,RHOB,RHOG,S100A10,SF3B4,SNX12,SNX5,SRC,SRSF3,THBS1,TM9SF4,VIM,VWF,YWHAQ	64
Cellular Movement,Hematological System Development and Function,Immune Cell Trafficking	Cell movement of antigen presenting cells	2.03e-09		1.968	APOA1,APOE,ARG1,AZU1,C5,C6,CD58,CD74,CNN2,CNP,COL4A3,CRKL,DICER1,DOCK2,EPS8,F2,FCN1,FLNA,FN1,GBA,GSN,HARS,HCLS1,HMGB1,ICAM1,IL16,IRF6,ITGAL,ITGAM,ITGAV,LMNB1,LSP1,MAPK14,MAPK3,MMP9,NARS,NDRG1,NPC1,NPM1,NQO1,PARP1,PFN1,PRKCD,PTK2B,PTPN1,RHOB,RPL13A,S100A10,SIRT1,SOD3,THBS1,THBS2,TIMP1,VASP,VCAN,YBX1	56
Cancer,Organismal Injury and Abnormalities	Thoracic neoplasm	2.07e-09		-0.141	ABCD1,ABHD11,ACOX2,ADAR,ADH1C,AGR2,AGRN,AHNAK,AHNAK2,AKR1B10,ALDH1B1,ALDH1L1,ALDH8A1,ALDOA,ALYREF,ANAPC1,ANP32A,ANXA2,APOA1,APOE,ARAP1,B2M,BAG6,BAX,BCCIP,BCKDHA,BCLAF1,BMX,BST1,C7,C8B,CAPRIN1,CASK,CASP3,CBX8,CENPF,CHMP4B,CKB,COL12A1,COL3A1,COL4A1,COL5A1,COL6A3,COPS6,CPNE1,CPS1,CRKL,CROCC,CRP,CSPG4,CSTA,CTH,CTNNBL1,CUL3,CUL4A,DCLK1,DDX17,DEK,DHX29,DICER1,DNMT1,DPP3,DPT,DPYSL3,EFEMP1,EHHADH,ELANE,E…	249
Neurological Disease,Organismal Injury and Abnormalities	Cerebral disorder	2.13e-09	Decreased	-2.4	ABAT,ADD3,ANXA5,APOA1,APOE,ARG1,BAX,CAPN2,CASP3,COL3A1,COL4A1,COL4A2,ENO3,F10,F2,FBLN1,FN1,FUS,GSN,HNF4A,HNRNPA1,HNRNPA2B1,HSPB1,ICAM1,ITGAV,LCN2,LMNB1,LMNB2,MAPK1,MAPK3,MMP9,NFKB1,OPTN,PARP1,PDCD10,PFKP,PFN1,PRPH,RAB11B,RHOB,RTN4,S100A13,SERPINA1,SIRT1,SQSTM1,STAMBP,TCEA1,THBS1,TIMP1,TUBA1C,TUBB,TUBB2A,TUBB4B,VIM,VWF,WDR62,YBX1	57
Cancer,Organismal Injury and Abnormalities,Reproductive System Disease	Development of genital tumor	2.32e-09			AASS,ABAT,ABCD1,ABCF2,ACACB,ACAD11,ACADM,ACADS,ACADSB,ACOX2,ACSL1,ACSL4,ACSM3,ACTR2,ADD3,ADGRE5,ADH1B,AEBP1,AGL,AGPS,AGXT2,AHCYL1,AHNAK,AHNAK2,AKAP2,ALDH1B1,ALDH1L1,ALDH8A1,ALDOA,ALYREF,ANLN,ANP32B,ANP32E,ANXA2,ANXA5,AP3D1,APIP,APOA4,APOE,ASPN,ATG16L1,AUH,B2M,BAG6,BCAT1,BCLAF1,BDH1,BMX,BST1,C5,C6,C7,C8B,CAD,CAP2,CAPN2,CAPN5,CASK,CCDC88B,CD2AP,CD74,CELF1,CENPF,CHD4,CNN1,CNP,COL12A1,COL18A1,COL3A1,…	365
Cellular Assembly and Organization	Formation of nucleus	2.68e-09	Increased	2.408	FLNA,FN1,FUS,LBR,LMNA,LMNB1,NONO,NUP107,NUP205,NUP93,PARP1,PES1,RAN,RBM14,RSL1D1,RTN4,SIRT1,SON,TMPO	19
Cellular Growth and Proliferation,Connective Tissue Development and Function,Tissue Development	Proliferation of connective tissue cells	2.92e-09	Increased	2.229	ADAR,AEBP1,AIMP1,ANXA2,BAX,BMX,CAPNS1,CASK,CD74,CIRBP,CNOT7,CRKL,CSK,DHX9,DICER1,DKC1,EIF2AK2,EMD,EPPK1,ERBIN,F2,FBLN1,FEN1,FN1,GRB2,HGS,HSPB1,IFI30,IGFBP7,IRF6,ITGAV,KHDRBS1,LIMA1,LMNA,LMNB1,LTF,MAP2K3,MAPK1,MAPK14,MAPK3,MKI67,MMP9,MORC3,NCSTN,NDRG1,NDRG2,NFKB1,NPM1,PML,POSTN,PPP5C,PRKCD,PRKDC,PSMD10,PSME3,PTPN1,RBM3,RELA,RHOB,RPS6KA3,S100A11,SAFB,SEPT6,SERPINH1,SFN,SIN3A,SIRT1,SRC,SRSF6,STMN1,T…	79
Cancer,Organismal Injury and Abnormalities,Respiratory Disease	Lung cancer	3.69e-09		0.216	ABCD1,ABHD11,ACOX2,ADAR,ADH1C,AGRN,AHNAK,AHNAK2,AKR1B10,ALDH1B1,ALDH1L1,ALDH8A1,ALDOA,ANAPC1,ANP32A,ANXA2,APOA1,APOE,ARAP1,B2M,BAG6,BAX,BCCIP,BCKDHA,BCLAF1,BMX,BST1,C7,C8B,CAPRIN1,CASK,CASP3,CBX8,CENPF,CHMP4B,CKB,COL12A1,COL3A1,COL4A1,COL5A1,COL6A3,COPS6,CPNE1,CPS1,CRKL,CROCC,CRP,CSPG4,CSTA,CTH,CTNNBL1,CUL3,CUL4A,DCLK1,DDX17,DEK,DHX29,DICER1,DNMT1,DPP3,DPT,DPYSL3,EFEMP1,EHHADH,ELANE,ELP3,EPPK1,EX…	241
Cancer,Gastrointestinal Disease,Hepatic System Disease,Organismal Injury and Abnormalities	Hepatitis B surface antigen-negative hepatitis C virus negative hepatocellular carcinoma	3.9e-09			ASS1,BHMT,CLIC1,CPS1,CYB5A,FGB,GLUD1,NPM1,SARDH,TPM3,UCHL5,VIM	12
Cancer,Organismal Injury and Abnormalities,Reproductive System Disease	Uterine cancer	3.94e-09			AASS,ABAT,ABCD1,ACACB,ACADM,ACADSB,ACOX2,ACSL1,ACSL4,ACSM3,ADD3,ADH1B,AGPS,AGXT2,AHCYL1,AHNAK,AHNAK2,ALDH1B1,ALDH1L1,ALDH8A1,ANP32B,ANP32E,ANXA2,ANXA5,AP3D1,APOA4,ASPN,ATG16L1,B2M,BAG6,BCAT1,BMX,BST1,C6,C7,C8B,CAD,CAP2,CAPN2,CAPN5,CASK,CCDC88B,CD2AP,CD74,CELF1,CENPF,CHD4,CNN1,COL12A1,COL3A1,COL4A2,COL5A1,COL6A3,COPS4,CPS1,CRP,CSNK2B,CSPG4,CTH,CTPS1,CTSH,CTSS,CYP4F2,DBNL,DCLK1,DCPS,DDX24,DENR,DES,…	291
Neurological Disease	Motor dysfunction or movement disorder	4.15e-09	Decreased	-2.174	ABCD1,ACADM,ADD3,ADH1C,AEBP1,AGA,AGL,AGRN,AHCYL1,ALDH2,ANXA2,APOA4,APOE,B2M,BAX,C5,C7,CAPNS1,CASP3,CD74,CHP1,CIRBP,CKB,CNP,COL4A3,COL6A3,CPB2,CRP,CTSS,DBNL,DCPS,DICER1,DNAJC3,DNMT1,DPYSL3,ENO3,ENPP1,EPHX2,EPS8,F11R,FAM3C,FGG,FMOD,FUBP1,FUS,GAN,GBA,GHITM,GOSR2,HEXB,HIP1,HMGB2,HNRNPU,HSBP1,HSPB1,HTRA2,ILF3,IMPA1,ITGAM,KHDRBS1,LAMA4,LCN2,LMCD1,LMNA,LMNB2,LTF,MAPK14,MECP2,MMP9,MSRA,NDRG1,NDRG2,NDUFB5…	128
Cellular Movement	Migration of tumor cell lines	4.21e-09	Increased	5.189	ACSL4,ADGRE5,AHNAK,ANXA2,ARHGEF16,BCAM,C5,CAPN2,CAPNS1,CAT,COL18A1,COL4A3,CRKL,CSK,CSNK2B,CTSH,CTTN,CUL4A,DNMT1,ECM1,EFEMP1,EIF2AK2,ELANE,ENPP1,F2,FAM120A,FBLN2,FBLN5,FGA,FLNA,FLNB,FN1,GALNT2,GMFG,HDAC6,HNRNPA2B1,HNRNPK,IFITM3,IGFBP7,ILF3,IPO7,ITGA2,ITGAV,KHDRBS1,LAMA5,LCN2,LMCD1,LMNA,MAP4,MAPK1,MAPK14,MAPK3,MMP9,MYH9,NCL,NDRG1,NDRG2,NPM1,PAK2,PALLD,PKM,PLGRKT,PML,POSTN,PPIC,PPIF,PPM1F,PRKCD,PRMT…	106
Hereditary Disorder,Neurological Disease,Organismal Injury and Abnormalities	Familial encephalopathy	4.37e-09			ABCD1,ACADM,ACSL1,ADAR,ADD3,AEBP1,AHCYL1,AIMP1,ALDH2,APOA4,APOE,B2M,BAX,BCS1L,C5,C7,CAD,CAPNS1,CASK,CASP3,CHP1,CIRBP,CKB,COL18A1,COL4A1,COL4A2,COL4A3,CRP,CTNNBL1,CTSS,DNAJC3,DNMT1,DPYSL3,ECHS1,EIF2A,EIF2B4,EIF2B5,ENO3,EPHX2,ERLIN1,F10,F11R,F2,FAM3C,FGG,FLNA,FUS,G6PD,GBA,GHITM,GLS,GOSR2,HDAC6,HMGB1,HMGB2,HNF4A,HNRNPA1,HNRNPA2B1,HNRNPU,HSBP1,HTRA2,ICAM1,IMPA1,ITGAM,KHDRBS1,KIF1BP,LAMA4,LMCD1,LMNB1,…	134
Cancer,Organismal Injury and Abnormalities	Intrathoracic malignant tumor	4.86e-09		-0.017	ABCD1,ABHD11,ACOX2,ADAR,ADH1C,AGRN,AHNAK,AHNAK2,AKR1B10,ALDH1B1,ALDH1L1,ALDH8A1,ALDOA,ANAPC1,ANP32A,ANXA2,APOA1,APOE,ARAP1,B2M,BAG6,BAX,BCCIP,BCKDHA,BCLAF1,BMX,BST1,C7,C8B,CAPRIN1,CASK,CASP3,CBX8,CENPF,CHMP4B,CKB,COL12A1,COL3A1,COL4A1,COL5A1,COL6A3,COPS6,CPNE1,CPS1,CRKL,CROCC,CRP,CSPG4,CSTA,CTH,CTNNBL1,CUL3,CUL4A,DCLK1,DDX17,DEK,DHX29,DICER1,DNMT1,DPP3,DPT,DPYSL3,EFEMP1,EHHADH,ELANE,ELP3,EPPK1,EX…	242
Cancer,Organismal Injury and Abnormalities	Malignant neoplasm of retroperitoneum	5.02e-09		0.093	ABHD11,ACACB,ACADS,ACOT7,ACOX2,ACSM5,ACTBL2,ADAR,AGL,AGR2,AGXT2,AHNAK,AHNAK2,AKAP2,ALDOA,ANLN,ANP32A,ANP32E,ANXA2,ANXA5,AP3D1,API5,ATG16L1,ATPAF2,ATXN2L,AUP1,B2M,BAX,BST1,C2,C5,C5orf51,C8G,CAD,CAPN2,CASP3,CD59,CD63,CD74,CENPF,CHD4,COL12A1,COL18A1,COL4A1,COL5A1,COL6A1,COL6A3,COL8A1,CPB2,CPN2,CRP,CSPG4,CTH,CTNNBL1,CTR9,CTSS,CTTN,DCLK1,DCPS,DDX59,DHX9,DICER1,DNAJC10,DOCK2,DRG2,DYNC1I2,EHD1,EHD3,EHHA…	282
RNA Post-Transcriptional Modification	Alternative splicing of mRNA	5.42e-09			DDX17,DHX9,HNRNPA1,HNRNPM,HNRNPU,KHDRBS1,PTBP1,RBM25,RBM8A,RBMX,SAP18,SRSF1,SRSF2,SRSF6,THRAP3,TRA2B	16
Cancer,Gastrointestinal Disease,Hepatic System Disease,Organismal Injury and Abnormalities	Hepatitis C virus-related hepatocellular carcinoma	5.71e-09			ABAT,ANXA5,ASS1,CAT,CPS1,ECHS1,GLUD1,NPM1,SULT1A1,TUBB,VIM	11
Cancer,Hematological Disease,Organismal Injury and Abnormalities	Mature lymphocytic neoplasm	5.77e-09			AASS,ACAD11,ACOT9,ADAR,AGL,AHNAK,ANXA2,ANXA4,ANXA5,APOE,ARHGAP17,B2M,BAX,BCAT1,BCLAF1,C7,CAD,CASP3,CAT,CD58,CD63,CD74,CDC37L1,CFL1,CHD4,CNP,COL12A1,COL18A1,COL3A1,COL4A1,COL4A2,COL6A1,COL6A2,CPSF7,CRP,CSK,CTSH,CTTN,CYP4F11,DEK,DMGDH,DNMT1,DOCK2,DPT,EHD1,EIF2A,ENPP1,F10,F11R,FAM129B,FEN1,FLG2,FLNA,FN1,FTCD,FUBP1,FUS,GBP2,GPD2,GRB2,GRHPR,GSN,GTF2I,HAO2,HCLS1,HDAC6,HIP1,HIST1H1C,HMGB1,HNRNPM,HNRNPU,…	160
Protein Synthesis	Termination of translation of protein	6.12e-09			MRPL11,MRPL12,MRPL13,MRPL14,MRPL16,MRPL18,MRPL19,MRPL21,MRPL37,MRPL41,MRPL44,MRPL53,MRPS17,MRPS2,MRPS22,MRPS27,MRPS28,MRPS5,MRPS9,PTCD3	20
Cancer,Organismal Injury and Abnormalities,Renal and Urological Disease	Renal tumor	7.29e-09		-0.632	ABHD11,ACACB,ACADS,ACOT7,ACOX2,AGXT2,AHNAK,AKAP2,ALYREF,ANLN,ANXA2,ANXA5,ATXN2L,B2M,BAX,BST1,C2,CAD,CENPF,CHD4,COL12A1,COL6A3,CPB2,CSPG4,CTR9,DICER1,DNAJC10,EHD3,EHHADH,EIF4G2,EPPK1,FABP5,FBLN5,FLG2,FLNA,FN1,G6PD,GBP2,GLS,GRHPR,GSN,GXYLT1,HCLS1,HDAC6,HIST1H1C,HMGB1,HNRNPH1,HNRNPK,HNRNPM,HSD17B7,HSP90AB1,HSPB6,KHDRBS1,KHSRP,KIF11,LAMC1,LMNA,LUC7L2,LXN,MAP2K3,MAPK1,MAPK14,MCM2,MDN1,MKI67,MMP9,MRE11…	134
Cell Cycle	Interphase	7.56e-09		1.786	ANXA2,APOE,ARG1,BAX,BCAT1,CAMK2D,CAPNS1,CAT,CDC25C,CDC5L,CRKL,CSNK2B,CUL3,CUL4A,DCTN3,DDX24,DNMT1,DYNC1I2,EIF2AK2,F2,FEN1,FLNA,FN1,GRB2,GTF2I,HAUS1,HMGA1,HSPB1,IGFBP7,IL16,ITGA2,ITGAV,KIF11,LMNA,LMNB1,MAP2K3,MAPK1,MAPK14,MAPK3,MAPRE1,MCM2,MCM5,MCM7,MMP9,MMS22L,MRE11,NAE1,NASP,NDRG1,NFKB1,NPM1,OPTN,PARP1,PCBP4,PCNA,PEA15,PKM,PML,POLR2A,PPIF,PPME1,PPP1CA,PPP1CB,PPP1R12A,PPP5C,PRKCD,PRKDC,PTK2B,RABL…	93
Connective Tissue Disorders,Inflammatory Disease,Inflammatory Response,Organismal Injury and Abnormalities,Skeletal and Muscular Disorders	Inflammation of joint	8.19e-09		1.381	ACOX2,ACSL1,ACTL6A,ADGRE5,ADSS,ALDOA,APOA1,APOE,ARG1,ASPN,B2M,BAG6,BHMT,BMX,C2,C5,C6,CAMK2D,CAPN2,CASP3,CD59,CD74,COL3A1,COL4A2,CRP,CSK,CTR9,CTSS,DEK,EEF1E1,EEF1G,EHD4,ELANE,EPHX2,F10,F11R,FCN1,FGA,FGB,FGG,FKBP5,FMOD,FN1,FUBP1,GALNT2,GAR1,GBP2,GCA,GNB2,GNL1,GSN,HCLS1,HMGB1,HNRNPA1,HNRNPA3,HSPB8,HSPG2,ICAM1,IGFBP7,IGKC,IKZF1,IL16,ITGAM,KANK2,KHSRP,LBP,LEMD2,LTF,MAPK14,MAPK3,MAPRE1,MBL2,MCM5,MLPH,M…	116
Infectious Diseases	Infection of tumor cell lines	8.82e-09	Increased	3.743	AASS,ACACB,ACADSB,ACTR2,ADGRE5,APOE,ARPC5,ATOX1,BAG6,BCLAF1,CD74,CLNS1A,CNOT7,COG2,CROCC,DIMT1,EIF2AK2,EIF3H,EPS8,FNTA,GBF1,GCSH,GOSR2,GPD2,HGS,HIP1,HMGB1,HNRNPK,HNRNPU,IFITM3,ITGAM,ITSN2,LCN2,MAP4,MBL2,MDN1,MGAT1,MMP9,MRPL44,NFKB1,NIPSNAP2,NMT1,NOP56,NRBP1,NUP107,NUP133,NUP155,PACSIN3,PCK1,PI4KA,PKN2,PLOD3,PPP5C,RAB11B,RAB6C/RAB6D,RAB8B,RANBP1,RELA,RPS6KA3,RSL1D1,SPATS2L,SRSF2,TM9SF2,TRAPPC8,WAS…	65
Cellular Movement	Migration of sarcoma cell lines	9.69e-09	Increased	3.631	ADGRE5,AHNAK,BCAM,CAPN2,CAT,COL4A3,CTTN,FBLN5,FLNA,FLNB,FN1,HNRNPK,MAPK1,MMP9,S100A11,SEPT9,SLC9A3R2,STMN1,TNC,TPM3,VCAN	21
Cardiovascular System Development and Function,Organismal Development	Angiogenesis	9.86e-09		1.843	AIMP1,ANXA2,APOA1,APOE,ARG1,BCLAF1,BMX,C5,C6,CAPNS1,CASP3,CAT,CD63,COL18A1,COL3A1,COL4A1,COL4A2,COL4A3,COL5A1,COL8A1,CRKL,CSK,CSPG4,CTH,CTSH,CTSS,CYP4A11,CYP4F2,DICER1,DRAP1,ECM1,EHD3,EHD4,EPHX2,F11R,F2,FBLN1,FBLN2,FBLN5,FLNA,FLNB,FN1,G6PD,GSN,GTF2I,HGS,HMGB1,HMGB2,HSD17B7,HSPB1,HSPB6,HSPG2,ICAM1,IDH3A,IGFBP7,ITGA2,ITGAM,ITGAV,LAMA4,LAMA5,LAMC1,LCN2,LTBP1,MAN2B1,MAP2K3,MAPK1,MAPK14,MECP2,MFGE8,MG…	112
Cancer,Organismal Injury and Abnormalities,Renal and Urological Disease	Renal cancer	9.93e-09		-0.632	ABHD11,ACACB,ACADS,ACOT7,ACOX2,AGXT2,AHNAK,AKAP2,ANLN,ANXA2,ANXA5,ATXN2L,B2M,BAX,BST1,C2,CAD,CENPF,CHD4,COL12A1,COL6A3,CPB2,CSPG4,CTR9,DICER1,DNAJC10,EHD3,EHHADH,EIF4G2,EPPK1,FABP5,FBLN5,FLG2,FLNA,FN1,G6PD,GBP2,GLS,GRHPR,GSN,GXYLT1,HCLS1,HDAC6,HIST1H1C,HMGB1,HNRNPH1,HNRNPK,HNRNPM,HSD17B7,HSP90AB1,HSPB6,KHDRBS1,KHSRP,KIF11,LAMC1,LMNA,LUC7L2,LXN,MAP2K3,MAPK1,MAPK14,MCM2,MDN1,MKI67,MMP9,MRE11,MYCBP2…	131
Neurological Disease	Movement Disorders	1.02e-08	Decreased	-2.043	ABCD1,ACADM,ADD3,ADH1C,AEBP1,AGA,AGL,AGRN,AHCYL1,ALDH2,ANXA2,APOA4,APOE,B2M,BAX,C5,C7,CAPNS1,CASP3,CD74,CHP1,CIRBP,CKB,CNP,COL4A3,COL6A3,CPB2,CRP,CTSS,DBNL,DCPS,DICER1,DNAJC3,DNMT1,DPYSL3,ENO3,EPHX2,F11R,FAM3C,FGG,FMOD,FUBP1,FUS,GAN,GBA,GHITM,GOSR2,HEXB,HIP1,HMGB2,HNRNPU,HSBP1,HSPB1,HTRA2,ILF3,IMPA1,ITGAM,KHDRBS1,LAMA4,LCN2,LMCD1,LMNA,LMNB2,LTF,MAPK14,MECP2,MMP9,MSRA,NDRG1,NDRG2,NDUFB5,NFKB1,NOP5…	125
Organismal Injury and Abnormalities	Benign lesion	1.04e-08		-1.184	ADGRE5,ADH1B,AEBP1,AGRN,AHCYL1,AHNAK,ALDH1B1,ALDH2,ALDOA,ANXA2,ANXA5,APOA1,ARG1,ASS1,BCLAF1,BDH1,BHMT,BYSL,CAD,CNP,COL12A1,COL18A1,COL3A1,COL4A1,COL4A2,COL4A3,COL5A1,COL6A1,COL6A2,COL6A3,COL8A1,CRP,DCLK1,DDX17,DDX24,DICER1,DKC1,DNMT1,DPT,ENO3,EPPK1,ERBIN,EXOC2,FABP5,FBLN1,FLNA,FMOD,GRB2,HMGA1,HMGB1,HMGB2,HSP90AB1,IFITM3,IGFBP7,JCHAIN,KIF11,KPNA3,LAMC1,LCN2,LSP1,LTBP1,MAPK1,MAPK3,MKI67,MMP9,MYH9,M…	110
Cancer,Hematological Disease,Immunological Disease,Organismal Injury and Abnormalities	Mature B-cell neoplasm	1.04e-08			AASS,ACAD11,AGL,AHNAK,ANXA2,ANXA4,ANXA5,APOE,ARHGAP17,B2M,BAX,BCAT1,BCLAF1,C7,CAD,CASP3,CAT,CD58,CD63,CD74,CDC37L1,CFL1,CHD4,CNP,COL12A1,COL18A1,COL3A1,COL6A1,CPSF7,CRP,CSK,CTTN,CYP4F11,DEK,DMGDH,DNMT1,DOCK2,DPT,EHD1,EIF2A,ENPP1,F10,F11R,FAM129B,FEN1,FLG2,FLNA,FN1,FTCD,FUBP1,FUS,GBP2,GPD2,GRB2,GRHPR,GSN,GTF2I,HAO2,HCLS1,HDAC6,HIP1,HIST1H1C,HMGB1,HNRNPM,HNRNPU,HSP90AB1,IDH3A,IGKC,IGLL1/IGLL5,IKZF1…	139
Connective Tissue Development and Function,Tissue Development	Growth of connective tissue	1.05e-08	Increased	2.046	ADAR,AEBP1,AIMP1,ANXA2,BAX,BMX,CAPNS1,CASK,CD74,CIRBP,CNOT7,CRKL,CSK,DHX9,DICER1,DKC1,EIF2AK2,EMD,EPPK1,ERBIN,F2,FBLN1,FEN1,FN1,GRB2,HGS,HMGA1,HNRNPA2B1,HSPB1,IFI30,IGFBP7,IRF6,ITGAV,KHDRBS1,LGALS4,LIMA1,LMNA,LMNB1,LTF,MAP2K3,MAPK1,MAPK14,MAPK3,MKI67,MMP9,MORC3,MYH9,NCSTN,NDRG1,NDRG2,NFKB1,NPM1,PML,POSTN,PPP5C,PRKCD,PRKDC,PSMD10,PSME3,PTPN1,RBM3,RELA,RHOB,RPS6KA3,S100A11,SAFB,SEPT6,SERPINH1,SFN,S…	83
Cellular Movement,Connective Tissue Development and Function	Cell movement of fibroblasts	1.12e-08	Increased	2.972	AIMP1,APOE,C5,CAPN2,CAPNS1,COL4A3,CRKL,DPT,EHD1,FLNB,FN1,GSN,HMGB1,IL16,LPP,LTF,MAPK1,MAPK14,MRC2,PALLD,PML,POSTN,PRKCD,RHOB,SRC,STMN1,THBS1,THBS2,TNS1,VASP,VIM,WASF2,ZYX	33
Hereditary Disorder,Organismal Injury and Abnormalities,Skeletal and Muscular Disorders	Autosomal dominant myopathy	1.21e-08			AHNAK,ASPN,CFL1,CNN3,COL3A1,COL4A1,COL4A2,COL5A1,COL6A1,COL6A2,COL6A3,DES,GARS,HARS,HNRNPA1,HNRNPA2B1,HSPB1,HSPB8,IFI30,LAMA4,LMNA,PABPN1,S100A11,SDCBP,SERPINH1,SQSTM1,SYNE1,TAX1BP3,TGFBI,TMEM43,TPM2,TPM3,TUBB2A,WASHC5	34
Molecular Transport,Protein Trafficking	Transport of protein	1.23e-08	Increased	3.315	AHCYL1,AP1M1,AP3D1,ARF5,CD74,CENPF,CFL1,CHP1,CTTN,EHD1,FLNA,HCLS1,HDAC6,HGS,IPO7,IPO9,LMNA,MAPK1,MAPK14,MYH9,NME2,NPM1,NUP155,NUP62,PML,PPM1F,PRKCD,RAB13,RAB1A,RAB3GAP2,RAN,RANGAP1,RHOB,SEC23IP,SNX1,SNX12,SNX27,SNX4,SQSTM1,SRC,STX7,TAP1,TOMM40,TPR,TRIM28	45
Cancer,Organismal Injury and Abnormalities,Renal and Urological Disease	Bladder carcinoma	1.27e-08			AADAT,ACACB,ACADS,ACOX2,AEBP1,AGL,AHNAK,AHNAK2,AP3D1,ATXN2L,BCKDHA,BCLAF1,C8G,CDC25C,CDC37,CENPF,CFL2,COL6A2,COPS4,CPS1,CRP,CSK,DHX9,DOCK2,ECM1,EPB41,EPPK1,EPS15L1,F11R,FAM120A,FBLN5,FCN1,FGGY,FLAD1,FYCO1,GAR1,GEMIN8,GRHPR,HCLS1,HGS,HIST1H1C,HMGB2,HNRNPA2B1,HSD17B7,HSP90AB1,HSPB6,HSPB8,HSPG2,IKZF1,ILF3,ITGAV,KYNU,LAMA4,LAMC1,LDHD,MAPK1,MCM2,MFGE8,MKI67,MMAA,MON2,MVP,MYCBP2,MYH9,MYL9,NCKAP1,NCSTN,…	121
Cancer,Cell Death and Survival,Organismal Injury and Abnormalities,Tumor Morphology	Necrosis of tumor	1.35e-08	Decreased	-2.314	AIMP1,ANXA2,B2M,BAX,CASP3,CAT,CD59,CD74,CHMP4B,COL18A1,EBNA1BP2,EIF2AK2,EXOC2,F2,FGA,FMOD,HMGB1,HSP90AB1,HSPB8,ISCU,ITGAV,MAPK1,MAPK14,MCM2,MFGE8,MMP9,NDRG1,NFKB1,NUP107,NUP155,NUP62,NXF1,PARP1,PML,PRKCD,PTK2B,PUF60,RAN,RBM39,RBM8A,RELA,RHOB,RPA2,RPA3,RPL13A,RPL35,RPL37A,RTN4,SF3A1,SF3B2,SF3B6,SIRT1,SMC1A,SNRPA1,SNRPD3,SON,SRC,THBS1,THBS2,TIMP1,U2AF2,UBE2I	62
Cell-To-Cell Signaling and Interaction,Hair and Skin Development and Function	Adhesion of epithelial cell lines	1.38e-08		1.612	BST1,F10,FGA,FGG,FN1,ICAM1,ITGA2,ITGAM,ITGAV,PNN,POSTN,RRAS,SRC,TIMP1	14
Cancer,Hematological Disease,Immunological Disease,Organismal Injury and Abnormalities	B cell cancer	1.43e-08		0.059	AASS,AHNAK,ANXA2,ANXA4,ARHGAP17,B2M,BAX,BCAT1,BCLAF1,BUB3,C7,CAD,CAT,CD58,CD63,CD74,CDC37L1,CHD4,CNP,COL12A1,COL18A1,COL3A1,COL4A2,COL6A1,CPSF7,CSK,CTTN,DEK,DICER1,DNMT1,DOCK2,DPT,EHD1,EIF2A,F11R,FEN1,FN1,FTCD,FUBP1,FUS,GBP2,GPD2,GRB2,GSN,GTF2I,HAO2,HCLS1,HDAC6,HIP1,HIST1H1C,HMGB1,HNRNPM,HNRNPU,HSP90AB1,HSPB1,ICAM1,IDH3A,IGKC,IGLL1/IGLL5,IKZF1,ITSN2,JCHAIN,KIF11,KPNA3,KRR1,LRRFIP1,MCM5,MKI67,MVK,…	124
Neurological Disease,Skeletal and Muscular Disorders	Neuromuscular disease	1.43e-08		-0.447	ACADM,ADH1C,AEBP1,AGRN,AHCYL1,ALDH2,ANXA2,APOA4,APOE,B2M,BAG6,BAX,C5,C7,CAPNS1,CASP3,CD74,CHP1,CIRBP,CKB,CNP,COL4A3,CRP,CSNK2B,CTSS,DBNL,DPYSL3,ENO3,EPHX2,F11R,FAM3C,FGG,FUBP1,GAN,GBA,GFPT1,GHITM,GSDMD,HDAC6,HMGB2,HNRNPA1,HNRNPU,HSBP1,HSPB1,HTRA2,IMPA1,ITGAM,ITGAV,KHDRBS1,LMCD1,LTF,MX1,NDRG1,NDRG2,NDUFB5,NFKB1,NPM1,OAS3,OPTN,OSBPL8,PARP1,PCNA,PDK3,PDLIM7,PFDN1,PFKM,PFN1,PKM,PPP1CB,PRRC2A,PTK2B,RA…	105
Infectious Diseases	Infection of kidney cell lines	1.45e-08	Increased	3.228	ADAR,AES,AMDHD2,CAD,CLTA,COL5A1,EIF2AK2,EIF2B5,EXOSC10,FXR1,HMGB1,HNRNPH1,IFITM3,ILF3,KHDRBS1,MAP4,MRE11,NCKAP1,NUP62,NXF1,PFKM,PGM1,PML,POLR2A,PRPF6,RAD21,RBM25,RELA,RHOB,RHOC,SF3A1,SF3B2,SFXN3,SNRPA1,SNRPD3,SRSF6,SUB1,TAGLN2,VWF,YBX1,ZYX	41
Infectious Diseases,Organismal Injury and Abnormalities	Infection of embryonic cell lines	1.45e-08	Increased	3.472	ADAR,AES,AMDHD2,CAD,CLTA,COL5A1,EIF2AK2,EIF2B5,EXOSC10,FXR1,HMGB1,HNRNPH1,IFITM3,ILF3,KHDRBS1,MAP4,MRE11,NCKAP1,NUP62,NXF1,PFKM,PGM1,POLR2A,PRPF6,RAD21,RBM25,RELA,RHOB,RHOC,RPS6KB1,SF3A1,SF3B2,SFXN3,SNRPA1,SNRPD3,SRSF6,SUB1,TAGLN2,VWF,YBX1,ZYX	41
Molecular Transport	Transport of molecule	1.5e-08	Increased	3.37	ABAT,ABCD1,ACADS,ACSL1,ACSL4,ACSL5,AEBP1,AHCYL1,AIMP1,ALYREF,ANP32A,ANXA2,AP1M1,AP3D1,APOA1,APOA4,APOC2,APOE,ARF5,ARG1,ATOX1,B2M,CAMK2D,CASK,CASP3,CAT,CD2AP,CD74,CENPF,CFL1,CHP1,CLIC1,CLNS1A,CNP,CORO1A,CPNE1,CTSS,CTTN,CUL3,DDX39A,EHD1,ELANE,ENPP1,F2,FABP5,FBLN5,FECH,FGA,FGB,FGG,FLNA,FN1,FUS,GBF1,GLS,GOSR2,GOT2,GSN,HCLS1,HDAC6,HGS,HMGA1,HNRNPA2B1,HNRNPD,HSD11B1,IPO7,IPO9,ITGAV,KHDRBS1,KIF5B,KMO,LB…	170
Cellular Movement	Cell movement of breast cancer cell lines	1.52e-08	Increased	3.248	ACSL4,AHNAK,ANXA2,ARHGEF16,CAPN2,CSNK2B,CTTN,CUL4A,ECM1,EIF2AK2,F11R,FLNA,FN1,ILF3,ITGA2,ITGAV,KHDRBS1,LCN2,LIMA1,MAPK1,MAPK14,MAPK3,MMP9,MYH9,NDRG1,PAK2,PALLD,PFN1,PPIC,PPM1F,PRKCD,PTPN1,RAB21,RAB27A,RACGAP1,RELA,RHOC,RUVBL1,S100A11,SDCBP,SEPT9,SERPINA1,SFN,SRC,STK24,TIMP1,TNS1,TUBA1C,UBE2I,VASP,VIM	51
Cardiovascular System Development and Function	Development of vasculature	1.56e-08		1.919	AIMP1,ANXA2,APOA1,APOE,ARG1,BCAM,BCLAF1,BMX,C5,C6,CAPN2,CAPNS1,CASP3,CAT,CD63,CNN1,COL18A1,COL3A1,COL4A1,COL4A2,COL4A3,COL5A1,COL8A1,CRKL,CSK,CSPG4,CTH,CTSH,CTSS,CTTN,CYP4A11,CYP4F2,DICER1,DRAP1,ECM1,EHD3,EHD4,ENPP1,EPHX2,F11R,F2,FBLN1,FBLN2,FBLN5,FGA,FLNA,FLNB,FMOD,FN1,FXR1,G6PD,GSN,GTF2I,HGS,HMGB1,HMGB2,HSD17B7,HSPB1,HSPB6,HSPG2,ICAM1,IDH3A,IGFBP7,ITGA2,ITGAM,ITGAV,LAMA4,LAMA5,LAMC1,LCN2,LTBP1,…	123
Cancer,Gastrointestinal Disease,Organismal Injury and Abnormalities	Colorectal carcinoma	1.57e-08			AASS,ABCF2,ACACB,ACOT7,ACOT9,ADAR,ADD3,AEBP1,AGL,AGRN,AHNAK2,AKAP2,AKR1B10,ALDH1B1,ALDH1L1,ALDH2,ALDH8A1,ALDOA,ANAPC1,ANXA4,AP3D1,API5,APIP,APOA4,ARAP1,ARHGAP10,ARHGEF16,ARMC8,ASPG,ASS1,ATG16L1,ATG3,ATXN2L,B2M,BAG6,BAX,BCAM,BCKDK,BMX,BST1,C2,C7,C8G,CACYBP,CAD,CAPN5,CAPRIN1,CASK,CASP3,CAT,CBX3,CCDC88B,CD2AP,CD58,CDC25C,CDC5L,CENPF,CHD4,CIRBP,CLPTM1L,CNP,COG2,COL12A1,COL18A1,COL4A2,COL4A3,COL5A1,CO…	376
Organismal Injury and Abnormalities,Renal and Urological Disease	Renal lesion	1.59e-08	Decreased	-2.059	ABHD11,ACACB,ACADS,ACOT7,ACOX2,AGA,AGXT2,AHNAK,AKAP2,ALYREF,ANLN,ANXA2,ANXA5,APOE,ATXN2L,B2M,BAX,BCS1L,BST1,C2,CAD,CENPF,CHD4,COL12A1,COL4A3,COL6A3,CPB2,CSPG4,CTR9,DICER1,DNAJC10,EHD3,EHHADH,EIF4G2,EPPK1,FABP5,FBLN5,FLG2,FLNA,FN1,G6PD,GBP2,GLS,GRHPR,GSN,GXYLT1,HCLS1,HDAC6,HIST1H1C,HMGB1,HNRNPH1,HNRNPK,HNRNPM,HSD17B7,HSP90AB1,HSPB6,KHDRBS1,KHSRP,KIF11,LAMC1,LMNA,LUC7L2,LXN,MAP2K3,MAPK1,MAPK14,MCM2…	140
Infectious Diseases	Infection of epithelial cell lines	1.61e-08	Increased	3.378	ADAR,AES,AMDHD2,CAD,CLTA,COL5A1,EIF2AK2,EIF2B5,EXOSC10,FXR1,HMGB1,HNRNPH1,IFITM3,ILF3,KHDRBS1,MAP4,MRE11,NCKAP1,NUP62,NXF1,PFKM,PGM1,POLR2A,PRPF6,RAD21,RBM25,RELA,RHOB,RHOC,SF3A1,SF3B2,SFXN3,SNRPA1,SNRPD3,SRSF6,SUB1,TAGLN2,VWF,YBX1,ZYX	40
Metabolic Disease,Organismal Injury and Abnormalities,Renal and Urological Disease	Aciduria	1.69e-08			AASS,AGXT2,BCKDHA,BCKDHB,CPS1,ETFDH,FLAD1,GCDH,GSTZ1,KYNU,L2HGDH,MAN2B1,MCEE,MLYCD,MMAA,MMAB,MVK	17
Cell Death and Survival	Cell viability of tumor cell lines	1.82e-08	Increased	5.087	ACSL5,AGA,AGPS,AGR2,AIMP1,ANAPC1,ANLN,APOE,ATG3,B2M,BAX,BCKDK,BCLAF1,BMX,CAMK2D,CAPN2,CASK,CASP3,CAT,COPS4,CRKL,CTTN,DHX9,DPP3,EBNA1BP2,ECM1,EPS15L1,FAM120A,FKBP5,FLNA,FN1,FUBP1,GLS,GLUD1,GMFG,H2AFY,HIP1,HMGA1,HMGB1,HNRNPUL1,HSP90AB1,HSPB1,HSPB8,IGFBP7,ITGAM,KIF11,LAMTOR3,LMNB1,MAP2K3,MAPK1,MAPK14,MCM2,MCM7,MMS22L,MRE11,NCSTN,NDUFAF4,NFKB1,NME3,NRBP1,NUP155,NUP210,NUP62,PARP1,PCNA,PES1,PFDN1,PFDN…	110
Cancer,Organismal Injury and Abnormalities	Connective or soft tissue tumor	1.86e-08		1.848	ABCD1,ACACB,ACAD11,ADGRE5,ADH1B,AGR3,AGRN,AHCYL1,ALDH1B1,ALDOA,APOA4,ASPN,ASS1,BAX,BDH1,C8G,CAT,CCDC88B,CD2AP,CDC37L1,CELF1,CNN1,CNN2,CNP,COL12A1,COL18A1,COL3A1,COL4A1,COL4A2,COL4A3,COL5A1,COL6A1,COL6A2,COL6A3,COL8A1,CPN2,CRKL,CSPG4,DCTN3,DDX24,DENR,DES,DICER1,DNAJC3,DPT,EFTUD2,EHHADH,EIF4G2,EML2,EPHX2,EPPK1,ETFDH,EXOC7,F10,F11R,F2,FBLN2,FGGY,FLAD1,FLG2,FLNA,FMOD,FN1,GLDC,GLS,GLYCTK,GRB2,HDAC6,HM…	156
Neurological Disease,Organismal Injury and Abnormalities,Psychological Disorders	Disorder of basal ganglia	1.95e-08			AADAT,ABCD1,ACADM,ADAR,ADH1C,AEBP1,AHCYL1,ALDH2,ANXA2,APOA4,APOE,B2M,BAX,C7,CAPNS1,CASP3,CD74,CIRBP,CKB,CNP,COL4A3,CRP,CTSS,DBNL,DPYSL3,ENO3,EPHX2,F11R,FAM3C,FGG,FUBP1,G6PD,GBA,GHITM,HMGB2,HNRNPU,HSBP1,HSPB1,HTRA2,IMPA1,ITGAM,KHDRBS1,LMCD1,LTF,MAN2B1,NDRG1,NDRG2,NDUFB5,NFKB1,NPM1,NUP62,OPTN,OSBPL8,PARP1,PCNA,PDK3,PDLIM7,PFDN1,PFKM,PFN1,PKM,PPP1CB,PTK2B,RAN,RANBP1,RELA,RHOG,RPL13A,RTN4,S100A10,SAP…	91
Cancer,Hematological Disease,Immunological Disease,Organismal Injury and Abnormalities	Plasma cell dyscrasia	2.02e-08			ANXA2,ANXA4,ANXA5,APOE,B2M,BCAT1,BCLAF1,CASP3,CAT,COL3A1,COL6A1,CRP,CSK,DEK,DPT,F10,F11R,FEN1,FLNA,FN1,FUBP1,FUS,GBP2,GRB2,GRHPR,GSN,GTF2I,HCLS1,HDAC6,HSP90AB1,IGKC,IKZF1,ITGAV,JCHAIN,KHDRBS1,KIF11,MKI67,MMP9,NAE1,NFKB1,NONO,NPM1,PARP1,PCNA,POSTN,PSIP1,PSME3,PTK2B,PTPN1,RPS6KB1,S100A10,SNX1,SRP54,TIMP1,TNS1,TOP2B,TP53RK,TUBA1C,TUBB2A,TUBB4B,U2AF1/U2AF1L5,VIM	62
Cellular Assembly and Organization,Cellular Function and Maintenance	Organization of filaments	2.06e-08		-0.194	AKAP2,ALDOA,ANXA2,ARAP1,ARHGAP17,CD2AP,CENPF,CFL1,CFL2,CHP1,CNP,COL3A1,COL5A1,CORO1A,CSK,DES,DPT,EPB41,EPPK1,FLNA,FN1,GSN,HSP90AB1,KIF1BP,MAPK14,MAPRE1,PLOD3,PTK2B,RBBP4,RHOB,RHOC,SERPINH1,TUBB,VIM,VPS54	35
Cell Death and Survival,Organismal Injury and Abnormalities	Necrosis of epithelial tissue	2.09e-08		0.458	ADAR,AIMP1,ALDH2,API5,ASS1,AZU1,BAX,CASP3,CAT,CCDC88B,CD74,CDC37,CENPF,CNP,COL18A1,COL4A2,COL4A3,CRP,CTH,CTSS,DDX17,DICER1,EIF2AK2,EIF2B5,EIF3H,EPX,F2,GSDMD,GSN,HDAC6,HMGB1,HNF4A,HSPB1,HSPB8,HTRA2,ICAM1,ITGA2,ITGAV,LCN2,MAP2K3,MAPK1,MAPK14,MAPK3,MFGE8,MMP9,MVK,NCL,NCOA5,NDRG1,NDRG2,NFKB1,NMNAT3,NPM1,OAS3,PAK2,PARP1,PEA15,PKN2,PON3,PPP5C,PRKCD,PRKDC,PSIP1,PTK2B,PTPN1,RAD21,RELA,RHOB,RRAS,SERPINA1,…	76
Energy Production,Lipid Metabolism,Small Molecule Biochemistry	Oxidation of fatty acid	2.42e-08	Decreased	-2.061	ABCD1,ACAA1,ACAA2,ACACB,ACAD11,ACADM,ACADS,ACADSB,ACOX2,ACSL1,ACSL4,ACSL5,ADH1C,APOA1,APOE,CYP4A11,ECHS1,EHHADH,GCDH,GOT2,HAO2,HSD11B1,MAPK14,MLYCD,NT5C2,RPS6KB1,SIRT1,SLC27A2,TBC1D1,TK2,VASP	31
Cell-To-Cell Signaling and Interaction,Tissue Development	Binding of extracellular matrix	2.42e-08		-0.388	BCAM,CASK,CD63,COL3A1,FBLN5,FGA,FGB,FGG,FN1,GP5,HSPG2,ITGA2,ITGAL,ITGAV,NID1,NID2,POSTN,RELA,THBS1,THBS2,TIMM10B,VCAN,ZYX	23
DNA Replication, Recombination, and Repair	Metabolism of DNA	2.48e-08		1.334	APOE,BAX,BMX,C5,CACYBP,CAPN2,CASP3,CUL4A,DHX9,EIF2AK2,FEN1,HMGA1,HMGB1,HMGB2,HNRNPA1,HSPB1,MAPK1,MCM2,MCM5,MCM7,MRE11,NAE1,NAP1L1,NASP,NCL,NFKB1,NPM1,PARP1,PCNA,PEA15,PFN1,PML,PRKCD,PTK2B,RAN,RELA,RPA1,RPA2,RPA3,RTN4,S100A11,SERPINA1,SET,SIN3A,SIRT1,SRC,SSRP1,STK24,TK2,TMPO,TRRAP,TSPYL1,UCHL5,XRCC5	54
Cellular Assembly and Organization,Cellular Function and Maintenance,Tissue Development	Formation of actin filaments	2.61e-08	Increased	3.017	ACTR2,AIMP1,APOA1,ARAP1,BMX,CARMIL1,CFL1,COL18A1,CORO1A,CTTN,CUL3,F2,FN1,GRB2,GSN,HCLS1,HDAC6,ICAM1,KANK2,LMCD1,MAPK1,NCKAP1,NPM1,PALLD,PDCD10,PFDN5,PFN1,PKN2,PPM1F,PRKCD,PTK2B,RBBP4,RHOB,RHOC,S100A10,SRC,STMN1,TGFBI,THBS1,THY1,TNC,TPM2,TPM3,U2AF2,VASP,WASF2,ZYX	47
Cell Cycle	M phase	2.79e-08		0.8	ANLN,BUB3,CAPN2,CD2AP,CFL1,CUL3,DCTN3,FLNA,FN1,HSPB1,LMNA,MAPK3,MAPRE1,MCM7,MYL9,NEDD4L,NPM1,PFN1,PKN2,PKP4,PRPF40A,RACGAP1,RAD21,RIC8A,SEPT11,SEPT6,SEPT7,SEPT9,SIRT1,SRC,SSRP1,TOP2B,TRRAP,UBAP2L,VASP,XRCC5,YBX1	37
Cellular Development,Cellular Growth and Proliferation,Connective Tissue Development and Function	Proliferation of fibroblast cell lines	2.92e-08	Increased	2.594	ALDOA,ATG3,BAX,CAPRIN1,CAT,CIRBP,CSNK2B,DHX9,DICER1,DPY30,EBNA1BP2,EIF2AK2,EIF3H,F2,FN1,G6PD,GBP2,GRB2,HMGA1,HMGB1,HSPB8,KHDRBS1,LMNA,LMNB1,LTBP1,MAP2K3,MAPK1,MAPK14,MAPK3,NOP58,NPM1,PAK2,PARP1,PCBP4,PFDN5,PKM,PML,PPIF,PPIL1,PRKCD,PTK2B,RAN,RELA,RHOB,RPS6KA3,SHMT1,SIRT1,SRC,SRSF1,STMN1,TBCB,THBS1,TNC,TPM3,TPR,TSN,UBTF,VCAN	58
Cellular Movement	Cellular infiltration	3.11e-08		-0.21	ALDH2,ALDOA,ANXA2,APOA1,APOE,ARG1,C2,C5,C6,CHD4,CNP,COL4A3,CPB2,CTSS,DICER1,DOCK2,ELANE,EPHX2,F2,FCN1,FGB,FN1,GBA,HARS,HMGB1,HSPB1,ICAM1,IL16,IRF6,ITGAL,ITGAM,LAMA4,LBP,LCN2,LMNB1,LTF,MAPK14,MAPK3,MMP9,MYH9,NDRG1,NFKB1,NPC1,NPM1,NQO1,PARP1,PRKCD,PTK2B,PTPN1,RAB27A,RELA,RPL13A,S100A10,SERPINA1,SIRT1,SOD3,THBS1,THBS2,TIMP1,TUBB,VASP,VWF,YBX1	63
Cellular Movement	Cell movement of sarcoma cell lines	3.24e-08	Increased	3.656	ADGRE5,AHNAK,BCAM,CAPN2,CAT,COL4A3,CTTN,EPS8,FBLN5,FLNA,FLNB,FN1,HNRNPK,MAPK1,MMP9,PTPN1,S100A11,SEPT9,SLC9A3R2,STMN1,TNC,TPM3,VCAN	23
Cancer,Cell Death and Survival,Organismal Injury and Abnormalities,Tumor Morphology	Cell death of tumor cells	3.25e-08	Decreased	-2.211	AIMP1,ANXA2,B2M,BAX,CASP3,CAT,CD59,CD74,CHMP4B,COL18A1,EBNA1BP2,EIF2AK2,EXOC2,F2,FMOD,HMGB1,HSP90AB1,HSPB8,ISCU,ITGAV,MAPK1,MAPK14,MCM2,MFGE8,MMP9,NDRG1,NFKB1,NUP107,NUP155,NUP62,NXF1,PARP1,PML,PRKCD,PTK2B,PUF60,RAN,RBM39,RBM8A,RELA,RHOB,RPA2,RPA3,RPL13A,RPL35,RPL37A,RTN4,SF3A1,SF3B2,SF3B6,SIRT1,SMC1A,SNRPA1,SNRPD3,SON,SRC,THBS2,TIMP1,U2AF2,UBE2I	60
Cell-To-Cell Signaling and Interaction,Connective Tissue Development and Function	Adhesion of fibroblasts	3.29e-08	Increased	2.172	CSK,FN1,ICAM1,ITGAL,ITGAM,ITGAV,PML,POSTN,RELA,SRC,THBS2,THY1,TNC,VCAN,ZYX	15
Protein Synthesis	Elongation of protein	3.5e-08			EEF1G,MRPL11,MRPL12,MRPL13,MRPL14,MRPL16,MRPL18,MRPL19,MRPL21,MRPL37,MRPL41,MRPL44,MRPL53,MRPS17,MRPS2,MRPS22,MRPS27,MRPS28,MRPS5,MRPS9,PTCD3,TSFM	22
Connective Tissue Disorders,Hereditary Disorder,Organismal Injury and Abnormalities	Hereditary connective tissue disorder	3.97e-08		-1.94	ADH1C,AEBP1,AGPS,AKR1B10,APOA1,APOE,ASPN,BANF1,CASK,CNN1,COL12A1,COL3A1,COL4A1,COL4A3,COL5A1,COL6A1,COL6A2,COL6A3,COL8A1,CRTAP,DCPS,DDX59,DICER1,DPT,EFTUD2,EIF2S3,ENPP1,F10,FBLN5,FLNA,FLNB,FN1,GSN,GYG2,HDAC6,HNRNPA1,HNRNPA2B1,HNRNPK,HSPG2,IKZF1,IRF6,ITGAM,KIF11,KYNU,LBR,LMNA,LMNB2,MAN2B1,MMP9,MTHFD1,MYH9,NFKB1,NSUN2,NUP107,NUP133,PI4KA,PLOD1,PLOD3,POSTN,PPP1CB,PTK2B,PUF60,RBM8A,RRAS,SERPINH1,SF3B…	79
Cellular Assembly and Organization,Cellular Function and Maintenance	Microtubule dynamics	4.22e-08	Increased	4.329	ACTR2,AGRN,AHNAK,ANP32A,APOE,ARAP1,BAX,BCCIP,BMX,C5,CAPG,CAPN2,CAPNS1,CAPRIN1,CARMIL1,CASP3,CD2AP,CENPF,CFL1,CHP1,CKB,CNP,CORO1A,CRIP1,CRKL,CROCC,CSRP1,CTSS,CTTN,DBNL,DCLK1,DICER1,DPYSL3,EHD1,EIF4G2,EML2,EPB41,EPHX2,EPS8,ERBIN,ESPN,F2,FLNA,FN1,GAN,GDI1,GSN,HDAC6,HMGB1,HMGB2,HNF4A,HNRNPK,HSP90AB1,HSPB1,ICAM1,ITGAM,KIF11,KIF13B,KIF1BP,KIF5B,LAMA5,LAMC1,LCN2,LMCD1,LMNB1,LTF,MAP4,MAPK1,MAPK3,MAPRE1,M…	133
Cellular Movement	Cell movement of connective tissue cells	4.3e-08	Increased	3.212	AIMP1,APOE,C5,CAPN2,CAPNS1,COL4A3,CRKL,DPT,DRG2,EHD1,FLNB,FN1,GSN,HMGB1,IL16,LIMA1,LPP,LTF,MAPK1,MAPK14,MAPK3,MRC2,PALLD,PML,POSTN,PRKCD,PTK2B,RHOB,SRC,STMN1,THBS1,THBS2,TNS1,VASP,VIM,WASF2,ZYX	37
Cellular Development,Cellular Growth and Proliferation	Cell proliferation of breast cancer cell lines	4.65e-08	Increased	2.969	ACSL4,ANXA2,BCCIP,BMX,CASP3,CAT,CD59,COL6A3,COPS4,CSPG4,CTR9,CUL4A,DDX17,EIF3H,FABP5,FAM120A,FBLN5,FN1,GLS,GRB2,HIST1H1C,HMGA1,HNRNPK,HSPB8,IFITM3,IGFBP7,IGKC,ILF3,ITGA2,LAMTOR5,LIMA1,MAP2K3,MAPK1,MAPK14,NCSTN,NDUFAF4,NONO,NPC1,NQO1,OAS3,PCK2,PFKP,PFN1,PIP4K2B,PKM,PML,PPP1R12A,PPP5C,PRKCD,PTBP1,PTK2B,RABL6,RACGAP1,RELA,SEPT9,SFN,SIPA1,SIRT1,SRC,TES,TIMM10B,TNC,TRIM28,UBE2I,YBX1,YWHAQ	66
Amino Acid Metabolism,Small Molecule Biochemistry	Metabolism of sulfur amino acid	5.09e-08			AMT,BHMT,BHMT2,CTH,GCSH,GLDC,GLYAT,MSRA,MTHFD1,SHMT1,SMS	11
Cell-To-Cell Signaling and Interaction,Cellular Assembly and Organization,Tissue Development	Binding of cell-associated matrix	5.14e-08		-1.091	BCAM,CASK,CD63,COL3A1,FBLN5,FGA,FGB,FGG,FN1,GP5,ITGA2,ITGAL,ITGAV,NID1,NID2,POSTN,THBS1,THBS2,TIMM10B,ZYX	20
Cellular Movement,Renal and Urological System Development and Function	Cell movement of kidney cell lines	5.14e-08	Increased	2.68	ANXA2,APOA1,CTTN,F10,FBLN2,FGA,FLNA,FN1,GRB2,HARS,HDAC6,ICAM1,ITGA2,ITGAM,MAPK1,MMP9,NARS,NFKB1,POSTN,RELA,RHOG,SEPT9,SNX27,SRC,SRSF1,STK24,THBS1,VIM	28
Amino Acid Metabolism,Small Molecule Biochemistry	Synthesis of L-amino acid	5.17e-08		-1.129	ARG1,BCAT1,BHMT,BHMT2,CTH,GLS,GLUD1,GOT2,GPT,MTHFD1,PKM,PSPH,VCAN	13
Cellular Movement	Cellular infiltration by myeloid cells	5.22e-08		0.767	ANXA2,APOA1,APOE,ARG1,C2,C5,C6,CNP,COL4A3,DICER1,DOCK2,ELANE,EPHX2,F2,FCN1,GBA,HMGB1,HSPB1,ICAM1,IL16,IRF6,ITGAL,ITGAM,LBP,LCN2,LMNB1,MAPK14,MMP9,NDRG1,NPC1,NPM1,NQO1,PARP1,PRKCD,PTK2B,PTPN1,RAB27A,RELA,RPL13A,S100A10,SERPINA1,SIRT1,SOD3,TIMP1,VASP,VWF,YBX1	47
Cancer,Cell Death and Survival,Organismal Injury and Abnormalities,Tumor Morphology	Cell death of cancer cells	5.4e-08	Decreased	-2.594	B2M,BAX,CASP3,CAT,CD59,CD74,CHMP4B,COL18A1,EBNA1BP2,EIF2AK2,EXOC2,FMOD,HMGB1,HSP90AB1,HSPB8,ISCU,ITGAV,MAPK1,MAPK14,MCM2,MMP9,NDRG1,NFKB1,NUP107,NUP155,NUP62,NXF1,PARP1,PML,PRKCD,PTK2B,PUF60,RAN,RBM39,RBM8A,RELA,RPA2,RPA3,RPL13A,RPL35,RPL37A,RTN4,SF3A1,SF3B2,SF3B6,SIRT1,SMC1A,SNRPA1,SNRPD3,SON,U2AF2,UBE2I	52
Cell-To-Cell Signaling and Interaction	Adhesion of tumor cell lines	5.69e-08	Increased	2.161	ADD3,ANXA2,APOE,CD59,CPB2,CSK,EFEMP1,F10,F11R,F2,FBLN5,FGA,FLNA,FN1,GMFG,HMGB1,ICAM1,IFITM3,ITGA2,ITGAL,ITGAM,ITGAV,LGALS4,LTF,MAPK1,MARCKS,MYH9,MYO6,NID1,NME3,PAK2,PKM,PTK2B,RAB21,RELA,RRAS,SIPA1,SIRT1,SNX1,SRC,THBS1,TJP1,TNC,UBE2I,VCAN,ZYX	46
Neurological Disease,Organismal Injury and Abnormalities	Progressive encephalopathy	7.04e-08			ABAT,ADH1C,AGRN,AKAP2,ALDH1L1,ALDH2,ANP32A,ANXA2,ANXA5,APOA1,APOA4,APOC2,APOE,ARG1,BAX,C5,C7,CAPN2,CASP3,CD2AP,CD74,CNN1,CNP,COL3A1,CRP,CTSS,DBNL,DHX9,DICER1,EEF1G,EIF2A,EIF2AK2,ENO3,EPHX2,FAM3C,FBLN1,FUBP1,FUS,GBA,GBP2,GOSR2,GSN,HMGA1,HNRNPA1,HNRNPA2B1,HNRNPU,HSD11B1,HSPB1,HSPG2,HTRA2,ICAM1,IGKC,KHDRBS1,LCN2,LMNB2,LTF,MAPK1,MFGE8,MMP9,MRC1,MVK,NAE1,NAT8,NCSTN,NDRG2,NDUFB8,NMNAT3,NQO1,OPTN,PCNA,P…	98
Cellular Compromise,Inflammatory Response	Degranulation of blood platelets	7.26e-08			ALDOA,ANXA5,APOA1,CD63,CDC37L1,ECM1,F2,FAM3C,FAM49B,FGA,FGB,FGG,FLNA,FN1,MANF,SERPINA1,SERPINA4,STXBP2,TAGLN2,THBS1,TIMP1,VWF	22
Cell-To-Cell Signaling and Interaction	Adhesion of blood cells	7.36e-08		1.521	ADGRE5,ANXA5,APOA1,APOA4,APOE,BCAM,C5,CD2AP,CD58,CD59,CD74,CORO1A,CRP,CSK,CTTN,DOCK2,ELANE,F10,F11R,F2,FGA,FGG,FLNA,FN1,GP5,HMGB1,HSPG2,ICAM1,ITGA2,ITGAL,ITGAM,LAMA5,LBP,LSP1,LTF,MAPK14,MRC1,PAK2,PTK2B,RELA,RHOB,SERPINA1,SIPA1,SRC,STXBP2,THBS1,THBS2,THY1,TNC,UBE2I,VASP,VWF	52
Cardiovascular Disease,Cardiovascular System Development and Function	Abnormal morphology of cardiovascular system	7.88e-08			ACACB,ACADM,ACSL1,APOE,BCAM,BMX,CAMK2D,CAPN2,CAPNS1,CASP3,CD2AP,CIAPIN1,COL18A1,COL3A1,COL4A3,COL5A1,COL8A1,CRKL,CTTN,DES,DICER1,DNAJC3,DSC2,EHD3,EHD4,EIF2B5,EMD,ENPP1,ERBIN,F2,FBLN1,FLNA,FMOD,FN1,FUBP1,FXR1,G6PD,GBP2,GRB2,GSN,HIST1H1C,HMGB1,HSD17B7,HSPB8,HSPG2,HTRA2,ITGAV,LAMA4,LMCD1,LMNA,LTBP1,MAN2B1,MAP2K3,MAPK1,MAPK14,MAPK3,MGAT1,MMP9,MYH9,MYL9,NCSTN,NEDD4L,NFKB1,NID1,PARP1,PDCD10,PDLIM3,PFKM…	98
Cancer,Organismal Injury and Abnormalities,Respiratory Disease	Non-small cell lung carcinoma	7.94e-08		-1.664	ABCD1,ACOX2,ADH1C,AGRN,AHNAK,AHNAK2,AKR1B10,ALDH1B1,ALDH1L1,ALDH8A1,ALDOA,ANAPC1,ANP32A,ANXA2,B2M,BAG6,BCCIP,BCKDHA,BCLAF1,BMX,BST1,C7,C8B,CAPRIN1,CASP3,CBX8,CENPF,CHMP4B,COL12A1,COL3A1,COL4A1,COL5A1,COL6A3,COPS6,CPNE1,CPS1,CRKL,CRP,CSPG4,CSTA,CTH,CTNNBL1,CUL3,CUL4A,DCLK1,DDX17,DEK,DHX29,DICER1,DPP3,DPT,EHHADH,EPPK1,EXOC7,F10,F2,FBLN2,FBLN5,FBP1,FGB,FGG,FKBP5,FLG2,FN1,FNTA,FUBP1,FXR1,GBP2,GCSH,GI…	195
Dermatological Diseases and Conditions,Organismal Injury and Abnormalities	Psoriasis	7.97e-08			ADAR,ADGRE5,ANP32A,ANXA2,APOE,ARG1,ATOX1,C5,CBX3,CD63,CFL1,CNN1,CRIP1,CRP,CSPG4,CSTA,CTSS,DDX39A,DSC2,EIF2S2,FABP5,FEN1,FMO5,FN1,GARS,GBA,GBP2,GOT2,GSN,H2AFY,ICAM1,IDH3A,IFI30,IGFBP7,IL16,ITGA2,ITGAL,KYNU,LAMA5,LCN2,LTF,MANF,MAP2K3,MARCKS,MECP2,MKI67,MMP9,MX1,NIPSNAP2,OAS3,PCNA,PKM,POSTN,PPIF,RAB27A,RAN,RANBP1,S100A11,SFN,SRM,SRSF9,SUB1,TNC,TRIM22,TUBB,UBE2I,VWF,YWHAB,YWHAQ	69
Cancer,Organismal Injury and Abnormalities,Reproductive System Disease	Breast carcinoma	8.45e-08		1.067	ABAT,ACACB,ACOT9,AGR2,ALDH1B1,ALDH1L1,ANLN,ANP32B,BAX,BCAM,BCAT1,BCCIP,CAPN2,CASK,CASP3,CDC5L,CENPF,CHD4,CKB,CNN1,CNN2,COL12A1,COL4A2,COL6A1,COL8A1,COMMD3,CROCC,CRTAP,CSNK2B,CSPG4,CTR9,DDX24,DHX29,DICER1,DKC1,DYNC1I2,ECM1,EFEMP1,EFTUD2,EIF2S2,EIF3H,EIF4B,ELP3,EML2,EPPK1,ESYT2,EXOSC9,F10,FBLN2,FBLN5,FGA,FKBP5,FLNA,FN1,FUBP1,FUS,G3BP2,GLS,GLUD1,GSN,GYG2,H2AFY,HDAC6,HIST1H1C,HIST2H2AB,HNRNPM,HSP90AB…	164
Protein Trafficking	Targeting of protein	8.54e-08			ACAA1,ACOX2,AGPS,AHCYL1,CAT,CDC37,CHMP4B,CHP1,EHHADH,EPHX2,ERBIN,GBF1,HAO2,HGS,KIF13B,MLPH,MLYCD,MYO6,OPTN,RAB27A,RAN,SLC25A6,SLC27A2,TIMM10B,TIMM9,TOMM22,TOMM40,TPR,YWHAB,YWHAQ	30
Cancer,Organismal Injury and Abnormalities,Reproductive System Disease	Endometrial cancer	8.81e-08			AASS,ABCD1,ACACB,ACADM,ACADSB,ACOX2,ACSL1,ACSL4,ACSM3,ADD3,ADH1B,AGPS,AGXT2,AHCYL1,AHNAK,AHNAK2,ALDH1B1,ALDH1L1,ALDH8A1,ANP32B,ANP32E,ANXA2,AP3D1,APOA4,ASPN,ATG16L1,B2M,BAG6,BCAT1,BMX,BST1,C6,C7,C8B,CAD,CAP2,CAPN2,CAPN5,CASK,CCDC88B,CD2AP,CD74,CELF1,CENPF,CHD4,CNN1,COL12A1,COL3A1,COL4A2,COL5A1,COL6A3,COPS4,CPS1,CRP,CSNK2B,CSPG4,CTH,CTPS1,CYP4F2,DCLK1,DCPS,DDX24,DENR,DES,DHRS1,DHX57,DHX9,DICER1,DN…	267
Metabolic Disease,Organismal Injury and Abnormalities,Renal and Urological Disease	Organic aciduria	9.3e-08			BCKDHA,BCKDHB,CPS1,ETFDH,FLAD1,GCDH,GSTZ1,KYNU,L2HGDH,MAN2B1,MCEE,MLYCD,MMAA,MMAB	14
Cellular Development,Cellular Growth and Proliferation,Connective Tissue Development and Function,Tissue Development	Cell proliferation of fibroblasts	9.51e-08	Increased	3.086	AEBP1,AIMP1,ANXA2,BAX,CD74,CIRBP,CRKL,DHX9,DKC1,EMD,F2,FEN1,FN1,GRB2,HGS,HSPB1,IFI30,IGFBP7,LMNA,LMNB1,LTF,MAP2K3,MAPK1,MAPK14,MAPK3,MMP9,MORC3,NCSTN,NDRG1,NDRG2,NPM1,PML,POSTN,PPP5C,PRKDC,PSME3,RBM3,SAFB,SEPT6,SIN3A,SRC,TIMP1,TMPO,TPR,TXNRD2,VCAN,VIM,WASF2,YBX1	49
Connective Tissue Disorders,Immunological Disease,Inflammatory Disease,Inflammatory Response,Organismal Injury and Abnormalities,Skeletal and Muscular Disorders	Rheumatoid arthritis	9.83e-08		1.951	ACOX2,ACSL1,ACTL6A,ADGRE5,ADSS,ALDOA,APOA1,APOE,ARG1,B2M,BAG6,BHMT,C2,C5,CAMK2D,CASP3,CD74,COL3A1,COL4A2,CRP,DEK,EEF1E1,EEF1G,EHD4,ELANE,EPHX2,F10,F11R,FCN1,FGB,FKBP5,FN1,FUBP1,GALNT2,GAR1,GBP2,GCA,GNB2,GNL1,GSN,HCLS1,HMGB1,HNRNPA1,HNRNPA3,HSPB8,ICAM1,IGFBP7,IGKC,IKZF1,IL16,KHSRP,LBP,LEMD2,LTF,MAPK3,MAPRE1,MBL2,MLPH,MMP9,MRC1,MRPS28,MYCBP2,NFKB1,NONO,PARP1,PFAS,PRRC2A,PTK2B,PTPN1,S100A10,SAFB,SF3…	88
Cancer,Organismal Injury and Abnormalities,Respiratory Disease	Lung carcinoma	1.06e-07		-0.787	ABCD1,ABHD11,ACOX2,ADAR,ADH1C,AGRN,AHNAK,AHNAK2,AKR1B10,ALDH1B1,ALDH1L1,ALDH8A1,ALDOA,ANAPC1,ANP32A,ANXA2,APOA1,APOE,ARAP1,B2M,BAG6,BCCIP,BCKDHA,BCLAF1,BMX,BST1,C7,C8B,CAPRIN1,CASK,CASP3,CBX8,CENPF,CHMP4B,CKB,COL12A1,COL3A1,COL4A1,COL5A1,COL6A3,COPS6,CPNE1,CPS1,CRKL,CROCC,CRP,CSPG4,CSTA,CTH,CTNNBL1,CUL3,CUL4A,DCLK1,DDX17,DEK,DHX29,DICER1,DPP3,DPT,EHHADH,EPPK1,EXOC7,F10,F2,FBLN2,FBLN5,FBP1,FGA,FGB…	219
Cancer,Organismal Injury and Abnormalities,Reproductive System Disease	Breast or ovarian carcinoma	1.1e-07		1.067	AASS,ABAT,ABCD1,ABCF2,ACACB,ACAD11,ACADS,ACOT9,ACTR2,AEBP1,AGL,AGR2,AHNAK2,AKAP2,ALDH1B1,ALDH1L1,ANLN,ANP32B,APIP,APOE,AUH,B2M,BAG6,BAX,BCAM,BCAT1,BCCIP,BCLAF1,BDH1,BMX,C5,C8B,CAD,CAPN2,CASK,CASP3,CDC5L,CENPF,CHD4,CKB,CNN1,CNN2,COL12A1,COL18A1,COL3A1,COL4A2,COL5A1,COL6A1,COL6A2,COL6A3,COL8A1,COMMD3,CPB2,CRKL,CROCC,CRTAP,CSNK2B,CSPG4,CTR9,CYP4A11,DCLK1,DDX24,DDX39A,DHX29,DICER1,DKC1,DMGDH,DNMT1,DY…	252
Cellular Assembly and Organization,Cellular Function and Maintenance,Tissue Development	Formation of actin stress fibers	1.12e-07	Increased	2.838	AIMP1,APOA1,ARAP1,BMX,CARMIL1,COL18A1,CTTN,CUL3,F2,FN1,HDAC6,KANK2,LMCD1,MAPK1,NPM1,PALLD,PDCD10,PFN1,PKN2,PPM1F,PRKCD,PTK2B,RBBP4,RHOB,RHOC,S100A10,SRC,STMN1,TGFBI,THBS1,THY1,TNC,TPM2,TPM3,U2AF2,VASP,WASF2,ZYX	38
Cancer,Gastrointestinal Disease,Organismal Injury and Abnormalities	Colon carcinoma	1.21e-07			ABCF2,ACACB,ACOT7,ACOT9,ADAR,ADD3,AEBP1,AGL,AGRN,AHNAK2,AKAP2,AKR1B10,ALDH1B1,ALDH1L1,ALDH2,ALDH8A1,ALDOA,ANAPC1,ANXA4,AP3D1,API5,APIP,APOA4,ARAP1,ARHGAP10,ARHGEF16,ASPG,ASS1,ATG16L1,ATG3,ATXN2L,B2M,BAG6,BAX,BCAM,BCKDK,BMX,BST1,C2,C8G,CACYBP,CAD,CAPN5,CAPRIN1,CASK,CASP3,CAT,CBX3,CCDC88B,CD2AP,CD58,CDC25C,CDC5L,CENPF,CHD4,CIRBP,CLPTM1L,CNP,COG2,COL12A1,COL18A1,COL4A2,COL4A3,COL5A1,COL6A1,COL6A3,CO…	355
Cancer,Gastrointestinal Disease,Organismal Injury and Abnormalities	Pancreatobiliary tumor	1.21e-07		-0.052	AADAT,ACACB,ACSM5,ACTBL2,ADAR,ADH1B,ADH1C,AGA,AGL,AGR2,AGXT2,AHNAK,AHNAK2,ALDOA,ALYREF,ANP32A,ANP32E,ANXA2,AP3D1,API5,ARHGEF16,ASPN,ATG16L1,ATPAF2,AUP1,BAX,BST1,C5,C5orf51,C8G,CAD,CAPN2,CASP3,CD59,CD63,CD74,CENPF,CFL2,CHD4,CLPTM1L,CNN1,COL12A1,COL18A1,COL4A1,COL4A3,COL5A1,COL6A1,COL6A2,COL6A3,COL8A1,CPB2,CPN2,CRP,CSPG4,CTH,CTNNBL1,CTR9,CTSS,CTTN,CYP4F11,CYP4F2,DCLK1,DCPS,DDX59,DEK,DHX9,DKC1,DOCK2…	269
Cell Death and Survival	Cell death of cervical cancer cell lines	1.26e-07		-0.491	ACSM5,ADRM1,ANXA2,ANXA5,API5,BAG6,BAX,BUB3,CASP3,CAT,CENPF,CTTN,DCTN3,DHX9,EIF2AK2,EIF4G2,EXOC2,FAM129B,FLNB,HNRNPH1,HNRNPK,HTRA2,KHDRBS1,KIF11,LETM1,LMNA,MAPK1,MAPK14,MAPK3,MMS22L,NASP,NDRG2,NUDCD3,PAK2,PARP1,PDLIM7,PKM,PML,PRKCD,PRKDC,PSIP1,PUF60,RACGAP1,RELA,RPA1,RPS6KA3,SQSTM1,SRSF1,TCERG1,TOP2B,UBE2I	51
Cellular Assembly and Organization,Cellular Function and Maintenance	Organization of actin cytoskeleton	1.36e-07	Increased	2.01	ACTR2,AKAP2,ALDOA,ARAP1,ARHGAP17,ARPC5,BST1,CAP2,CD2AP,CFL1,CFL2,CORO1A,CSK,CSRP1,CTTN,DOCK2,EPB41,EPS8,F2,FLNA,FLNB,FN1,GMFG,GSN,ICAM1,MAPK14,MYH9,PALLD,PDLIM7,PFDN1,PRKCD,PTK2B,PTPN1,RAB13,RAN,RBBP4,RHOB,RHOC,RHOG,SRC,VASP,VWF,WASF2	43
Cancer,Hematological Disease,Immunological Disease,Organismal Injury and Abnormalities	Non-Hodgkin lymphoma	1.38e-07		0.492	AASS,ADAR,AHNAK,ANXA2,ANXA4,ARHGAP17,B2M,BAX,BCAT1,BCLAF1,C7,CAD,CASP3,CD58,CD63,CHD4,CNP,COL12A1,COL18A1,COL3A1,COL4A1,COL4A2,COL6A1,COL6A2,CPSF7,CTSH,DNMT1,DOCK2,EHD1,EIF2A,F11R,FEN1,FN1,FTCD,FUBP1,FUS,GBP2,GPD2,GRB2,GSN,GTF2I,HAO2,HCLS1,HDAC6,HIP1,HIST1H1C,HMGB1,HNRNPM,HNRNPU,HSP90AB1,ICAM1,IDH3A,IFI30,IGFBP7,IGKC,IGLL1/IGLL5,IKZF1,IL16,ITSN2,KIF11,KRR1,LRRFIP1,MAP2K3,MAPK3,MCM5,MKI67,MMP9,MX1…	124
Post-Translational Modification	Sumoylation of protein	1.51e-07			NUP107,NUP133,NUP155,NUP205,NUP210,NUP35,NUP37,NUP43,NUP62,NUP93,RANGAP1,TPR,TRIM28,UBE2I	14
Cellular Movement,Hematological System Development and Function,Immune Cell Trafficking,Inflammatory Response	Cell movement of neutrophils	1.6e-07		0.968	ANXA2,APOA1,APOE,AZU1,BST1,C2,C5,CAPG,CD74,CNN2,CORO1A,CRP,CTTN,DEK,DICER1,DOCK2,ELANE,EPHX2,F10,F2,FCN1,FN1,GBF1,GSN,HMGB1,HSPB1,ICAM1,IRF6,ITGAL,ITGAM,LBP,LCN2,LSP1,MAPK14,MMP9,NQO1,PARP1,RAB27A,RELA,RTN4,SERPINA1,TIMP1,VASP,VWF,YBX1	45
Cell-To-Cell Signaling and Interaction	Binding of connective tissue cells	1.79e-07	Increased	2.66	ANXA2,APOE,CSK,DRG2,FN1,GSN,ICAM1,IPO9,ITGAL,ITGAM,ITGAV,MAPK1,MAPK3,MRC2,MYH9,PALLD,PML,POSTN,PTK2B,RAB21,RELA,RHOB,SRC,TGFBI,THBS2,THY1,TNC,VCAN,ZYX	29
Cellular Movement	Migration of breast cancer cell lines	1.79e-07	Increased	2.605	ACSL4,AHNAK,ANXA2,ARHGEF16,CAPN2,CSNK2B,CTTN,CUL4A,ECM1,EIF2AK2,FLNA,FN1,ILF3,ITGAV,KHDRBS1,LCN2,MAPK1,MAPK14,MAPK3,MMP9,MYH9,NDRG1,PAK2,PALLD,PPIC,PPM1F,PRKCD,RAB21,RACGAP1,RELA,RHOC,RUVBL1,S100A11,SDCBP,SEPT9,SFN,SRC,STK24,TIMP1,TNS1,UBE2I,VASP,VIM	43
Cellular Movement	Invasion of breast cancer cell lines	1.83e-07	Increased	4.41	ACSL4,AHNAK,CASP3,CRTAP,CSNK2B,CTSS,CTTN,DBNL,ECM1,EFEMP1,F11R,F2,FN1,HGS,IFITM3,ILF3,LCN2,LIMA1,MAPK1,MMP9,NCKAP1,NDUFAF4,PAK2,PALLD,PPIC,PPM1F,PSMD10,PTBP1,PTK2B,RELA,RHOC,RPS6KA3,RUVBL1,S100A11,SDCBP,SEPT9,SERPINA1,SIPA1,SRC,STMN1,TIMP1,TJP1,TNC,TNS1,VIM	45
Neurological Disease	Progressive neurological disorder	1.86e-07		-0.625	ABAT,ADH1C,AGRN,AKAP2,ALDH1L1,ALDH2,ANP32A,ANXA2,ANXA5,APOA1,APOA4,APOC2,APOE,ARG1,BAG6,BAX,C5,C7,CAPN2,CASP3,CD2AP,CD74,CNN1,CNP,COL3A1,CRP,CTSS,DBNL,DHX9,DICER1,EEF1G,EIF2A,EIF2AK2,ENO3,EPHX2,FAM3C,FBLN1,FUBP1,FUS,GBA,GBP2,GOSR2,GSDMD,GSN,HMGA1,HNRNPA1,HNRNPA2B1,HNRNPU,HSD11B1,HSP90AB1,HSPB1,HSPG2,HTRA2,ICAM1,IGKC,ITGAV,KHDRBS1,LCN2,LMNB2,LTF,MAPK1,MFGE8,MMP9,MRC1,MVK,MX1,MYH9,NAE1,NAT8,NCSTN,N…	110
Cancer,Hematological Disease,Immunological Disease,Organismal Injury and Abnormalities	B-cell lymphoma	1.95e-07			AASS,AHNAK,ANXA2,ANXA4,ARHGAP17,B2M,BAX,BCAT1,BCLAF1,BUB3,C7,CAD,CD58,CD63,CD74,CHD4,CNP,COL12A1,COL18A1,COL3A1,COL4A2,CPSF7,DNMT1,DOCK2,EHD1,EIF2A,F11R,FEN1,FN1,FTCD,FUBP1,FUS,GBP2,GPD2,GRB2,GSN,GTF2I,HAO2,HCLS1,HDAC6,HIP1,HIST1H1C,HMGB1,HNRNPM,HNRNPU,HSP90AB1,ICAM1,IDH3A,IGKC,IGLL1/IGLL5,IKZF1,ITSN2,KIF11,KRR1,LRRFIP1,MCM5,MKI67,NCBP1,NFKB1,NID1,NID2,NONO,NUP205,NXF1,PARP1,PARP4,PC,PCNA,PDLIM3,…	102
Cancer,Hematological Disease,Immunological Disease,Organismal Injury and Abnormalities	B-cell non-Hodgkin lymphoma	2.07e-07			AASS,AHNAK,ANXA2,ANXA4,ARHGAP17,B2M,BAX,BCAT1,BCLAF1,C7,CAD,CD58,CD63,CHD4,CNP,COL12A1,COL18A1,COL3A1,COL4A2,CPSF7,DNMT1,DOCK2,EHD1,EIF2A,F11R,FEN1,FN1,FTCD,FUBP1,FUS,GBP2,GPD2,GRB2,GSN,GTF2I,HAO2,HCLS1,HDAC6,HIP1,HIST1H1C,HMGB1,HNRNPM,HNRNPU,HSP90AB1,IDH3A,IGKC,IGLL1/IGLL5,ITSN2,KIF11,KRR1,LRRFIP1,MCM5,MKI67,NCBP1,NFKB1,NID1,NID2,NONO,NUP205,NXF1,PARP1,PARP4,PC,PCNA,PDLIM3,PLEKHG3,POLR3B,POSTN,P…	97
Cell Cycle	M phase of cervical cancer cell lines	2.2e-07		1.189	ANLN,CD2AP,DCTN3,LMNA,MAPK3,MCM7,NEDD4L,NPM1,PKN2,RACGAP1,SEPT11,SEPT6,SEPT7,SEPT9,SSRP1,TOP2B,UBAP2L	17
Cell-To-Cell Signaling and Interaction,Cellular Assembly and Organization,Tissue Development	Adhesion of cell-associated matrix	2.2e-07			BCAM,CASK,CD63,COL3A1,FBLN5,FGA,FGB,FGG,FN1,GP5,ITGA2,ITGAL,ITGAV,NID1,NID2,POSTN,THBS1,TIMM10B,ZYX	19
Cell-To-Cell Signaling and Interaction	Attachment of cells	2.25e-07	Increased	2.38	BCAM,CRP,DOCK2,F11R,FBLN5,FN1,HSPG2,ICAM1,IPO9,ITGA2,ITGAL,LAMC1,MBL2,PKM,POSTN,PRKCD,PTK2B,RHOB,SRC,TGFBI,THBS2,THY1,VCAN,VWF	24
Cellular Movement,Immune Cell Trafficking	Leukocyte migration	2.25e-07	Increased	2.519	ADGRE5,AIMP1,ANXA2,ANXA5,APOA1,APOE,ARG1,ATG16L1,AZU1,BST1,C2,C5,C6,CAPG,CAT,CD58,CD63,CD74,CNN2,CNP,COL4A1,COL4A3,CORO1A,CPB2,CRKL,CRP,CSK,CTSS,CTTN,DEK,DICER1,DOCK2,ELANE,EPHX2,EPS8,F10,F11R,F2,FABP5,FCN1,FGB,FLNA,FN1,GBA,GBF1,GRB2,GSN,HARS,HCLS1,HDAC6,HMGB1,HSPB1,ICAM1,IGHV3-33,IGKC,IGLL1/IGLL5,IGLV3-21,IL16,IRF6,ITGA2,ITGAL,ITGAM,ITGAV,JCHAIN,LAMA4,LAMA5,LBP,LCN2,LMNB1,LSP1,LTF,MAP2K3,MAPK14,…	109
Immunological Disease	Early stage acute graft-vs-host disease	2.4e-07			ACSM3,BCKDHA,CTSH,ENO3,G6PD,HSD11B1,HSPG2,ICAM1,LAMA5,LTF,MYO6,PPM1F,SF3A1,SUB1	14
Cellular Movement	Cellular infiltration by blood cells	2.41e-07		-0.146	ANXA2,APOA1,APOE,ARG1,C2,C5,C6,CNP,COL4A3,CPB2,DICER1,DOCK2,ELANE,EPHX2,F2,FCN1,FGB,FN1,GBA,HARS,HMGB1,HSPB1,ICAM1,IL16,IRF6,ITGAL,ITGAM,LAMA4,LBP,LCN2,LMNB1,LTF,MAPK14,MAPK3,MMP9,NDRG1,NFKB1,NPC1,NPM1,NQO1,PARP1,PRKCD,PTK2B,PTPN1,RAB27A,RELA,RPL13A,S100A10,SERPINA1,SIRT1,SOD3,THBS1,TIMP1,VASP,VWF,YBX1	56
Cell Cycle,DNA Replication, Recombination, and Repair	DNA recombination	2.51e-07	Increased	2.258	ALYREF,BANF1,CHD4,DNMT1,ENY2,GPS1,HMGA1,HMGB1,HMGB2,HNRNPC,KANK2,MMS22L,MRE11,PARP1,PKN2,PRKDC,PRPF6,RAD21,RBMX,RPA1,RPA2,RUVBL1,SF3A3,SF3B2,SF3B4,SNRNP200,SNRPA1,TSN	28
Cancer,Organismal Injury and Abnormalities,Reproductive System Disease	Uterine carcinoma	2.56e-07			AASS,ABCD1,ACACB,ACADM,ACADSB,ACOX2,ACSL1,ACSL4,ACSM3,ADD3,AGPS,AGXT2,AHCYL1,AHNAK,AHNAK2,ALDH1B1,ALDH1L1,ALDH8A1,ANP32B,ANP32E,AP3D1,APOA4,ASPN,ATG16L1,B2M,BAG6,BCAT1,BMX,BST1,C6,C7,C8B,CAD,CAP2,CAPN2,CAPN5,CASK,CCDC88B,CD2AP,CD74,CELF1,CENPF,CHD4,COL12A1,COL3A1,COL4A2,COL5A1,COL6A3,COPS4,CPS1,CRP,CSNK2B,CSPG4,CTH,CTPS1,CTSH,CTSS,CYP4F2,DCLK1,DCPS,DDX24,DENR,DHRS1,DHX57,DHX9,DICER1,DNMT1,DRAP1,D…	264
Connective Tissue Disorders,Organismal Injury and Abnormalities,Skeletal and Muscular Disorders	Non-traumatic arthropathy	2.57e-07		1.109	ACOX2,ACSL1,ACTL6A,ADGRE5,ADSS,ALDOA,APOA1,APOE,ARG1,ASPN,B2M,BAG6,BHMT,C2,C5,CAMK2D,CASP3,CD74,COL3A1,COL4A2,CRP,DEK,EEF1E1,EEF1G,EHD4,ELANE,EPHX2,F10,F11R,FCN1,FGB,FKBP5,FMOD,FN1,FUBP1,GALNT2,GAR1,GBP2,GCA,GNB2,GNL1,GSN,HCLS1,HMGB1,HNRNPA1,HNRNPA3,HSPB8,ICAM1,IGFBP7,IGKC,IKZF1,IL16,KANK2,KHSRP,LBP,LEMD2,LTF,MAPK3,MAPRE1,MBL2,MLPH,MMP9,MRC1,MRPS28,MYCBP2,NFKB1,NONO,PARP1,PFAS,POSTN,PRRC2A,PSIP1,…	97
Organismal Injury and Abnormalities	Growth of lesion	2.71e-07	Increased	2.252	ACSL4,AGPS,AIMP1,AKR1B10,ANXA2,APOA1,APOE,BMX,CACYBP,CAPN2,CAPNS1,CASP3,CD58,CD59,COL18A1,COL4A1,COL4A3,CRKL,CTSS,CTTN,CUL4A,DICER1,DNMT1,DSC2,EFEMP1,EIF4B,ELANE,F2,FABP5,FAM129B,FBLN5,FGA,FLNA,FN1,GALNT2,GLDC,GLS,GRB2,H2AFY,HDAC6,HMGA1,HMGB1,HMGB3,HNF4A,HSPG2,ICAM1,IDH3A,IFITM3,IGFBP7,IKZF1,IL16,ILF3,ITGAM,ITGAV,LAMA4,LAMTOR5,LCN2,LIMA1,MAP2K3,MAP4,MAPK1,MAPK14,MFGE8,MKI67,MMP9,NDRG1,NDRG2,NONO,…	103
Gene Expression	Expression of RNA	2.76e-07	Increased	3.322	ACACB,ACTR2,AEBP1,AES,AGR2,AGRN,ALYREF,ANP32A,ANXA4,APOE,AZU1,BAX,BCLAF1,BMX,CAMK2D,CAPRIN1,CASK,CBX3,CBX8,CD74,CDC5L,CENPF,CHD4,CNN2,CNOT7,CNP,COL4A2,CPNE1,CRKL,CRP,CTR9,CTSH,CUL3,CUL4A,DCLK1,DDX17,DEK,DHX9,DICER1,DNMT1,DRAP1,ECM1,EFEMP1,EIF2A,EIF2AK2,EIF2B4,EIF2B5,EIF2S3,EIF3H,EIF4B,EIF4G2,EIF4H,ELANE,ELOB,ELP3,ENY2,EPHX2,EXOSC9,F2,FAM129B,FAM98A,FAM98B,FBP1,FECH,FLNA,FN1,FUBP1,FUS,FXR1,GBP2,GC…	215
DNA Replication, Recombination, and Repair	DNA replication	2.76e-07		0.831	CACYBP,CUL4A,DHX9,FEN1,HMGA1,HMGB1,HMGB2,MAPK1,MCM2,MCM5,MCM7,MRE11,NAE1,NAP1L1,NASP,NCL,NPM1,PARP1,PCNA,PEA15,PML,PTK2B,RPA1,RPA2,RPA3,S100A11,SET,SIN3A,SIRT1,SRC,SSRP1,TK2,TMPO,TRRAP,TSPYL1,UCHL5,XRCC5	37
Lipid Metabolism,Small Molecule Biochemistry	Fatty acid metabolism	2.91e-07	Increased	2.101	ABAT,ABCD1,ACAA1,ACAA2,ACACB,ACADSB,ACOT7,ACOT9,ACSL1,ACSL4,ACSL5,ACSM3,AEBP1,APOA1,APOA4,APOC2,APOE,AZU1,C5,CD74,CTSS,CUL3,CYP4A11,CYP4F11,CYP4F2,EHHADH,EPHX2,ERLIN1,F2,FABP5,FN1,GBA,GCDH,GLYAT,GOT2,GSN,HAO2,HNF4A,IGFBP7,IL16,ITGAV,LBP,LPGAT1,LTF,MAP2K3,MAPK1,MAPK14,MAPK3,ME2,MLYCD,NCEH1,NFKB1,NPC1,NQO1,OSBPL8,PARP1,PKM,PLIN2,PML,PRKAB2,PRKCD,PTGES2,PTK2B,RELA,RTN4,SDHA,SIRT1,SLC27A2,SLC9A3R2,VI…	71
Cardiovascular System Development and Function,Cellular Movement	Cell movement of endothelial cells	3.05e-07		1.63	AIMP1,ANXA2,APOE,BMX,CD63,CNN2,COL18A1,COL4A1,COL4A2,CRP,CSNK2B,CSPG4,DICER1,F11R,FLNA,FLNB,FN1,G6PD,HMGB1,HSP90AB1,HSPB1,HSPG2,ICAM1,ITGA2,ITGAV,MAP2K3,MAPK1,MAPK14,MARCKS,MECP2,MMP9,NCL,PKM,PML,PTK2B,PTPN1,RHOB,RTN4,SASH1,SEPT7,SIRT1,SRC,TGFBI,THBS1,THBS2,THY1,TIMP1,TJP1,VASP,VIM,VWF	51
Infectious Diseases,Respiratory Disease	Viral respiratory infection	3.22e-07			ACSL1,AIMP1,CD63,CRP,F10,G3BP2,GYG1,HIST1H1C,ITGAM,LCN2,LTF,MNDA,MSRA,PYGL,RAB13,RAB31,SERPINA1,STXBP2,TIMP1,TUBB4B,ZYX	21
Cell Morphology	Size of cells	3.31e-07			AP3D1,APOE,B2M,BAX,BHMT,CFL1,CLNS1A,CNP,COL18A1,COL8A1,CRKL,CUL3,DICER1,DPYSL3,EHD1,EIF2B5,EPB41,EPS8,F2,FLNA,FMO5,FN1,GLUD1,HDAC6,HEXB,HGS,ICAM1,LAMTOR5,LCN2,LIMA1,LMNA,LMNB1,LMNB2,MAPK1,MAPK14,MAPK3,MECP2,MYH9,NFKB1,NPM1,PAK2,PARP1,PCK1,PLIN2,PON3,PRKAB2,PRKCD,PSME3,PTBP1,PUS1,RAB1A,RAB27A,RBBP4,RPS6KA3,RPS6KB1,RSL1D1,RTN4,SEPT11,SIRT1,SLC12A2,SRC,TAP1,TBC1D4,THBS2,TJP1,TMPO,TPM3	67
Cellular Movement,Hematological System Development and Function,Immune Cell Trafficking	Cell movement of leukocytes	3.33e-07	Increased	2.491	ANXA2,APOA1,APOE,ARG1,AZU1,BST1,C2,C5,C6,CAPG,CD58,CD63,CD74,CNN2,CNP,COL4A1,COL4A3,CORO1A,CPB2,CRKL,CRP,CSK,CTSS,CTTN,DEK,DICER1,DOCK2,ELANE,EPHX2,EPS8,F10,F11R,F2,FABP5,FCN1,FGB,FLNA,FN1,GBA,GBF1,GSN,HARS,HCLS1,HDAC6,HMGB1,HSPB1,ICAM1,IL16,IRF6,ITGA2,ITGAL,ITGAM,ITGAV,LAMA4,LAMA5,LBP,LCN2,LMNB1,LSP1,LTF,MAPK14,MAPK3,MMP9,MYH9,NARS,NDRG1,NFKB1,NPC1,NPM1,NQO1,PARP1,PFN1,PRKCD,PTK2B,PTPN1,RAB27A,R…	93
Cell-To-Cell Signaling and Interaction	Binding of tumor cell lines	3.35e-07		1.93	ADD3,ANXA2,ANXA5,APOE,CD59,CPB2,CSK,EFEMP1,F10,F11R,F2,FBLN5,FGA,FLNA,FN1,GMFG,HMGB1,ICAM1,IFITM3,ITGA2,ITGAL,ITGAM,ITGAV,LAMA5,LGALS4,LTF,MAPK1,MARCKS,MYH9,MYO6,NCL,NID1,NME3,PAK2,PALLD,PKM,PTK2B,RAB21,RELA,RRAS,S100A10,SIPA1,SIRT1,SNX1,SRC,THBS1,THY1,TJP1,TNC,U2AF2,UBE2I,VCAN,ZYX	53
Amino Acid Metabolism,Small Molecule Biochemistry	Catabolism of alpha-amino acid	3.36e-07			AASS,AFMID,AMT,FTCD,GCSH,GLDC,GLUD1,GOT2,GSTZ1,HPD,PAH,PRODH2,SHMT1	13
Cell-To-Cell Signaling and Interaction,Cellular Function and Maintenance,Inflammatory Response	Phagocytosis of cells	3.37e-07	Increased	2.078	ANXA5,APOA1,ATG3,AZU1,CAPG,CAT,CKB,CNN2,CORO1A,CRP,CSK,DOCK2,EHD1,ELANE,F10,FCN1,FLNA,GRB2,GSN,HMGB1,ICAM1,ITGAM,ITGAV,LCN2,MAPK1,MAPK14,MBL2,MFGE8,MRC1,MYH9,NPM1,PALLD,PFN1,PRKCD,RAB27A,RAB31,RHOG,SRC,THBS1,TM9SF4,VIM,VWF	42
Cellular Compromise,Cellular Function and Maintenance	Endoplasmic reticulum stress response	3.37e-07		1.316	BAX,CDC37,COL3A1,COL4A1,COL4A3,CTH,CTSS,DNAJC10,EFEMP1,EIF2A,EIF2AK2,EIF2B5,ELANE,EPHX2,HSP90AB1,MMP9,PML,PTPN1,SDF2L1,SERPINH1,SIRT1,SQSTM1,STT3B,TBL2,THBS1,TMCO1,TMX1,UFC1	28
Cellular Movement,Hematological System Development and Function,Immune Cell Trafficking	Cellular infiltration by leukocytes	3.59e-07		-0.15	ANXA2,APOA1,APOE,ARG1,C2,C5,C6,CNP,COL4A3,CPB2,DICER1,DOCK2,ELANE,EPHX2,F2,FCN1,FGB,FN1,GBA,HARS,HMGB1,HSPB1,ICAM1,IL16,IRF6,ITGAL,ITGAM,LAMA4,LBP,LCN2,LMNB1,LTF,MAPK14,MAPK3,MMP9,NDRG1,NFKB1,NPC1,NQO1,PARP1,PRKCD,PTK2B,PTPN1,RAB27A,RELA,RPL13A,S100A10,SERPINA1,SIRT1,SOD3,THBS1,TIMP1,VASP,VWF,YBX1	55
Cell-To-Cell Signaling and Interaction,Embryonic Development	Binding of embryonic cell lines	3.69e-07		1.486	ANXA2,F10,FGA,FGG,FN1,GRB2,ICAM1,ITGAM,ITGAV,PALLD,PNN,POSTN,PRMT5,PTPN1,RRAS,SRC,TIMP1	17
Immunological Disease	Immunodeficiency	4.5e-07			ADAR,B2M,C2,C5,C6,C7,C8B,CD74,CORO1A,CTPS1,DOCK2,F2,FGA,FGB,FGG,G6PD,GIMAP1,GRHPR,IGKC,IGLL1/IGLL5,IKZF1,KIF1BP,LTF,MLPH,MTHFD1,MX1,NFKB1,PRKCD,PRKDC,RAB27A,RELA,TAP1,TAP2,TAPBP,TRNT1	35
Energy Production,Lipid Metabolism,Small Molecule Biochemistry	Oxidation of lipid	4.5e-07		-1.956	ABCD1,ACAA1,ACAA2,ACACB,ACAD11,ACADM,ACADS,ACADSB,ACOX2,ACSL1,ACSL4,ACSL5,ADH1C,APOA1,APOE,CAT,CSNK2B,CYP4A11,ECHS1,EHHADH,GCDH,GOT2,HAO2,HSD11B1,MAPK14,MLYCD,NT5C2,RPS6KB1,SIRT1,SLC27A2,TBC1D1,TK2,VASP	33
Cancer,Organismal Injury and Abnormalities,Reproductive System Disease	Endometrial carcinoma	4.55e-07			AASS,ABCD1,ACACB,ACADM,ACADSB,ACOX2,ACSL1,ACSL4,ACSM3,ADD3,AGPS,AGXT2,AHCYL1,AHNAK,AHNAK2,ALDH1B1,ALDH1L1,ALDH8A1,ANP32B,ANP32E,AP3D1,APOA4,ASPN,ATG16L1,B2M,BAG6,BCAT1,BMX,BST1,C6,C7,C8B,CAD,CAP2,CAPN2,CAPN5,CASK,CCDC88B,CD2AP,CD74,CELF1,CENPF,CHD4,COL12A1,COL3A1,COL4A2,COL5A1,COL6A3,COPS4,CPS1,CRP,CSNK2B,CSPG4,CTH,CTPS1,CYP4F2,DCLK1,DCPS,DDX24,DENR,DHRS1,DHX57,DHX9,DICER1,DNMT1,DRAP1,DUOX2,ECHDC…	249
Cell Cycle	Senescence of cells	4.7e-07		-0.822	ADD3,APOE,ARHGAP10,BUB3,CASP3,CAT,CIRBP,COL4A2,DDX24,DEK,DICER1,DNMT1,DPY30,ERBIN,H2AFY,HMGA1,HNRNPD,IGFBP7,LMNA,LMNB1,MAP2K3,MAPK1,MAPK14,MAPK3,ME2,MORC3,NID2,NPM1,PARP1,PCBP4,PML,PRKCD,PRKDC,PTK2B,RACGAP1,RELA,SIRT1,SRSF1,SRSF2,SRSF3,VCAN,YBX1	42
Cell-To-Cell Signaling and Interaction,Tissue Development	Adhesion of extracellular matrix	4.8e-07		-1.4	BCAM,CASK,CD63,COL3A1,FBLN5,FGA,FGB,FGG,FN1,GP5,ITGA2,ITGAL,ITGAV,NID1,NID2,POSTN,THBS1,TIMM10B,VCAN,ZYX	20
Dermatological Diseases and Conditions,Organismal Injury and Abnormalities	Chronic psoriasis	4.88e-07			APOE,ARG1,ATOX1,CNN1,CRIP1,DDX39A,EIF2S2,FABP5,GARS,GOT2,KYNU,LCN2,MANF,MAP2K3,MARCKS,MX1,PKM,POSTN,PPIF,RANBP1,S100A11,SRM,UBE2I	23
Protein Trafficking	Interaction of protein	4.99e-07		1.137	AASS,ACACB,ACADM,ACADS,AGRN,ANXA2,APIP,BAX,CAT,CD74,COL18A1,COL4A3,CPSF7,CTH,DCXR,EPB41,F2,FBP1,FGA,FGB,FN1,GFPT1,GLS,HM13,HMGA1,HSPG2,MAPK1,PARP1,PCK1,PFKM,PFKP,PKM,PML,PTPN1,RELA,S100A10,SHMT1,UPB1,XRCC5	39
Nucleic Acid Metabolism	Metabolism of nucleic acid component or derivative	5.08e-07		1.869	ACAA2,ACACB,ACADSB,ACOT7,ACOT9,ADSS,ALDH2,ALDOA,APOA1,BHMT2,C5,CASP3,CAT,CTPS1,DCXR,DNMT1,DTYMK,EHHADH,ENPP1,F2,FBP1,FUS,G6PD,GCDH,GFPT1,GLDC,GLYAT,GMDS,GNB2,HMGB1,HNF4A,IDH3A,KYNU,LETM1,MAN2B1,MAPK1,MLYCD,MSRA,MTHFD1,NME2,NQO1,NT5C2,OAS3,PARP1,PFAS,PKM,PML,PPA1,PPCS,PPIF,PRKCD,PTK2B,RIC8A,SET,SHMT1,SIRT1,SNX1,SNX5,TK2,TP53I3	60
Free Radical Scavenging	Synthesis of reactive oxygen species	5.11e-07		1.971	ALDH2,ANXA2,APOA1,APOC2,APOE,ARG1,ATG16L1,BAX,C5,CASP3,CAT,CLIC1,COL18A1,CRP,CTH,CTTN,DOCK2,DUOX2,ELANE,ERBIN,F2,FBLN5,FBP1,FLNA,FN1,G6PD,GSN,H2AFY,HMGB1,HNRNPK,HSP90AB1,HSPB1,HSPB6,ICAM1,IRF6,ITGAM,LETM1,LTBP1,LTF,MAP2K3,MAPK1,MAPK14,MBL2,MLPH,MRC1,NPC1,NQO1,PCK1,PON3,PRKCD,PTPN1,RPS6KB1,RRAS,RTN4,SDHA,SERPINA1,SERPINA4,SIRT1,SQSTM1,SRC,TXNRD2	61
Cancer,Organismal Injury and Abnormalities,Respiratory Disease	Respiratory system tumor	5.23e-07		0.07	ABCD1,ABHD11,ACOX2,ADAR,ADH1C,AGR2,AGRN,AHNAK,AHNAK2,AKR1B10,ALDH1B1,ALDH1L1,ALDH8A1,ALDOA,ALYREF,ANAPC1,ANP32A,ANXA2,APOA1,APOE,ARAP1,B2M,BAG6,BAX,BCCIP,BCKDHA,BCLAF1,BCS1L,BMX,BST1,BTBD18,C7,C8B,CAPRIN1,CASK,CASP3,CBX8,CENPF,CHD4,CHMP4B,CKB,COL12A1,COL3A1,COL4A1,COL5A1,COL6A3,COPS6,CPB2,CPNE1,CPS1,CRIP2,CRKL,CROCC,CRP,CSPG4,CSTA,CTH,CTNNBL1,CUL3,CUL4A,DCLK1,DDX17,DEK,DHX29,DICER1,DNMT1,DOCK2,DP…	269
Protein Synthesis	Oligomerization	5.35e-07		-0.152	AHNAK,AKAP2,ANXA5,APOE,BAX,CAMK2D,CHMP4B,CHP1,DPYSL3,EHD1,EHD3,EHD4,FUS,GRB2,GRHPR,GSDMD,HAO2,HDAC6,IKZF1,JCHAIN,KHDRBS1,LETM1,MBL2,MMP9,NME2,NPM1,OPTN,PFKM,PPP5C,RBMX,SEPT11,SEPT7,SEPT9,SQSTM1,TRA2B,TRIM28,UPB1,VWF,YWHAB	39
Cell-To-Cell Signaling and Interaction,Cellular Assembly and Organization	Quantity of actin stress fibers	5.53e-07		0.577	ARAP1,CFL1,COL18A1,CSK,F2,FLNA,FLNB,FN1,LIMA1,MARCKS,RBBP4,RHOB,RPS6KA3,SLC9A3R2,SRC	15
Cellular Movement,Hematological System Development and Function,Immune Cell Trafficking,Inflammatory Response	Infiltration by neutrophils	5.58e-07		0.194	ANXA2,APOA1,APOE,C2,C5,DICER1,ELANE,EPHX2,F2,FCN1,HMGB1,HSPB1,ICAM1,IRF6,ITGAL,ITGAM,LBP,LCN2,MAPK14,MMP9,NQO1,PARP1,RAB27A,RELA,SERPINA1,TIMP1,VASP,VWF,YBX1	29
Cancer,Gastrointestinal Disease,Organismal Injury and Abnormalities	Upper gastrointestinal tract tumor	5.77e-07		0	ACAD11,ACOT9,ACSL4,ADD3,ADH1B,AGRN,AHNAK,AHNAK2,AKAP2,ALDH2,ALYREF,AMDHD2,AMT,ANAPC1,ANLN,APOE,ARHGEF16,ASPN,ATXN2L,B2M,BAX,BCAM,BCKDHA,BHMT,BST1,BTBD18,C6,C8B,CAD,CASP3,CD63,CDC5L,CENPF,CFL2,CHD4,CKB,CNN1,COL12A1,COL18A1,COL4A1,COL4A2,COL5A1,COL6A2,COL6A3,COL8A1,CORO1A,CPS1,CRIP2,CRTAP,CSPG4,CSTA,CTPS1,CTR9,CTSH,CTTN,CUL4A,CYP4F11,CYP4F2,DDX24,DDX59,DHX57,DICER1,DKC1,DNMT1,DOCK2,DPT,DPYSL3,DSC2,…	258
Amino Acid Metabolism,Small Molecule Biochemistry	Metabolism of glutamine family amino acid	5.77e-07			AADAT,ARG1,CAD,DDAH2,GLS,GLUD1,GLYATL1,ME2,MECP2,PFAS,PRODH2,RHOC	12
Cell-To-Cell Signaling and Interaction,Hematological System Development and Function,Immune Cell Trafficking	Adhesion of immune cells	5.83e-07		1.975	ADGRE5,ANXA5,APOA1,APOA4,APOE,C5,CD2AP,CD58,CD74,CORO1A,CRP,CSK,CTTN,DOCK2,ELANE,F10,F11R,F2,FGA,FGG,FLNA,FN1,HMGB1,ICAM1,ITGA2,ITGAL,ITGAM,LBP,LSP1,LTF,MAPK14,MRC1,PAK2,PTK2B,RELA,RHOB,SERPINA1,SIPA1,SRC,STXBP2,THBS1,THBS2,THY1,TNC,UBE2I,VASP,VWF	47
Cancer,Organismal Injury and Abnormalities,Reproductive System Disease	Female genital tract adenocarcinoma	5.98e-07			AASS,ABCD1,ABCF2,ACACB,ACAD11,ACADM,ACADS,ACADSB,ACOX2,ACSL1,ACSL4,ACSM3,ACTR2,ADD3,ADH1B,AEBP1,AGL,AGPS,AGXT2,AHCYL1,AHNAK,AHNAK2,AKAP2,ALDH1B1,ALDH1L1,ALDH8A1,ANLN,ANP32B,ANP32E,ANXA2,AP3D1,APIP,APOE,ASPN,ATG16L1,AUH,B2M,BAG6,BCAT1,BCLAF1,BDH1,BMX,BST1,C5,C6,C7,C8B,CAD,CAP2,CAPN2,CAPN5,CASK,CCDC88B,CD74,CENPF,CHD4,CNN1,COL12A1,COL18A1,COL3A1,COL4A2,COL5A1,COL6A2,COL6A3,COPS4,CPB2,CPS1,CRKL,CROC…	301
Cancer,Organismal Injury and Abnormalities,Respiratory Disease	Nonsquamous non-small cell lung carcinoma	6.68e-07		-1.664	ABCD1,ADH1C,AGRN,AHNAK,AHNAK2,ALDH1B1,ALDH8A1,ALDOA,ANAPC1,ANP32A,B2M,BAG6,BCCIP,BCKDHA,BMX,BST1,C7,C8B,CAPRIN1,CBX8,CENPF,CHMP4B,COL12A1,COL3A1,COL4A1,COL5A1,COL6A3,COPS6,CPNE1,CPS1,CRKL,CSPG4,CSTA,CTH,CTNNBL1,CUL3,CUL4A,DCLK1,DDX17,DEK,DHX29,DICER1,EHHADH,EPPK1,EXOC7,FBLN2,FBLN5,FGB,FKBP5,FLG2,FN1,FUBP1,GBP2,GCSH,GIMAP1,GTPBP1,HEXB,HIST1H1C,HMGA1,HNF4A,HNRNPA1,HPD,HSP90AB1,HSPB6,HSPG2,IKZF1,ILF…	159
Tissue Development	Growth of epithelial tissue	6.82e-07		-0.598	AGR2,AIMP1,APOA1,APOE,ARG1,BAX,BCLAF1,BMX,C5,CASK,CASP3,CDC37,COL18A1,COL4A1,COL4A2,COL4A3,COL8A1,CPB2,CUL3,CUL4A,CYP4F2,DICER1,ECM1,EIF3H,EPPK1,ERBIN,F11R,F2,FBLN5,FN1,G6PD,HDAC6,HMGB1,HMGB2,HNF4A,HSPG2,IGFBP7,IRF6,LAMA5,LAMC1,LCN2,LMNA,LMNB1,LTF,MAPK1,MAPK14,MFGE8,MKI67,MMP9,NCOA5,NCSTN,NDRG2,NFKB1,NME2,NPM1,PAK2,PBLD,PC,PKM,PML,POSTN,PRKCD,PRKDC,PTPN1,RELA,RIDA,RPS6KB1,RRAS,S100A11,SEPT9,SFN,S…	81
Cancer,Organismal Injury and Abnormalities,Respiratory Disease	Lung adenocarcinoma	6.83e-07		-1.664	ABCD1,ADH1C,AGRN,AHNAK,AHNAK2,ALDH1B1,ALDH8A1,ALDOA,ANAPC1,ANP32A,B2M,BAG6,BCCIP,BCKDHA,BMX,BST1,C7,C8B,CAPRIN1,CBX8,CENPF,CHMP4B,COL12A1,COL3A1,COL4A1,COL5A1,COL6A3,COPS6,CPNE1,CPS1,CRKL,CSPG4,CSTA,CTH,CTNNBL1,CUL3,CUL4A,DCLK1,DDX17,DEK,DHX29,DICER1,EHHADH,EPPK1,EXOC7,FBLN2,FBLN5,FGB,FKBP5,FLG2,FN1,FUBP1,GBP2,GCSH,GIMAP1,GTPBP1,HEXB,HIST1H1C,HMGA1,HNF4A,HNRNPA1,HPD,HSP90AB1,HSPB6,HSPG2,IKZF1,ILF…	158
Cancer,Organismal Injury and Abnormalities,Respiratory Disease	Development of lung tumor	7.21e-07		-0.761	ABCD1,ADH1C,AGRN,AHNAK,AHNAK2,ALDH1B1,ALDH8A1,ALDOA,ANAPC1,ANP32A,B2M,BAG6,BCCIP,BCKDHA,BMX,BST1,C7,C8B,CAPRIN1,CBX8,CENPF,CHMP4B,COL12A1,COL3A1,COL4A1,COL5A1,COL6A3,COPS6,CPNE1,CPS1,CRKL,CSPG4,CSTA,CTH,CTNNBL1,CUL3,CUL4A,DCLK1,DDX17,DEK,DHX29,DICER1,EHHADH,EPPK1,EXOC7,FBLN2,FBLN5,FGB,FKBP5,FLG2,FN1,FUBP1,GBP2,GCSH,GIMAP1,GTPBP1,HEXB,HIST1H1C,HMGA1,HNF4A,HNRNPA1,HPD,HSP90AB1,HSPB6,HSPG2,IKZF1,ILF…	160
Connective Tissue Disorders,Organismal Injury and Abnormalities,Skeletal and Muscular Disorders	Advanced Dupuytren contracture	7.25e-07			COL12A1,COL18A1,COL3A1,COL4A1,COL4A2,COL4A3,COL5A1,COL6A1,COL6A2,COL6A3,COL8A1	11
Cancer,Organismal Injury and Abnormalities,Reproductive System Disease	Peyronie disease	7.25e-07			COL12A1,COL18A1,COL3A1,COL4A1,COL4A2,COL4A3,COL5A1,COL6A1,COL6A2,COL6A3,COL8A1	11
Cell Death and Survival	Anoikis of carcinoma cell lines	7.64e-07		-0.707	COL4A1,COL4A2,CTTN,FN1,NDRG1,PRKCD,RHOB,SRC	8
Cancer,Organismal Injury and Abnormalities	Connective tissue tumor	7.7e-07		1.848	ABCD1,ACACB,ACAD11,ADGRE5,AGR3,AGRN,APOA4,ASPN,ASS1,BAX,C8G,CAT,CCDC88B,CD2AP,CDC37L1,CELF1,CNN1,CNN2,COL12A1,COL18A1,COL3A1,COL4A1,COL4A2,COL4A3,COL5A1,COL6A1,COL6A2,COL6A3,COL8A1,CPN2,CRKL,CSPG4,DCTN3,DENR,DICER1,DNAJC3,EFTUD2,EHHADH,EIF4G2,EML2,EPHX2,ETFDH,EXOC7,F10,F11R,F2,FBLN2,FGGY,FLAD1,FLG2,FLNA,FN1,GLDC,GLS,GLYCTK,HDAC6,HMGA1,HMGB1,HSP90AB1,HSPG2,ISYNA1,KIF11,LAMA4,LAMA5,LETM1,LMNB2,MAP4…	132
Cancer,Organismal Injury and Abnormalities	Ductal carcinoma	7.89e-07			AADAT,ABAT,ACACB,ACSM5,ACTBL2,ADAR,ADH1B,ADH1C,AGA,AGL,AGR2,AGXT2,AHNAK2,ALDOA,ANP32A,ANP32E,ANXA2,AP3D1,API5,ARHGEF16,ATG16L1,ATPAF2,AUP1,BAX,BCCIP,BST1,C5orf51,C8G,CAD,CAPN2,CENPF,CFL2,CHD4,CLPTM1L,CNN1,COL12A1,COL18A1,COL4A1,COL5A1,COL6A1,COL6A2,COL6A3,COL8A1,CPB2,CPN2,CRP,CSPG4,CTH,CTNNBL1,CTTN,DCLK1,DCPS,DDX59,DEK,DHX9,DICER1,DKC1,DOCK2,DRG2,DYNC1I2,ECM1,EFEMP1,EHD1,EHHADH,EIF2AK2,EIF2S3,ELP…	235
Cardiovascular System Development and Function,Organismal Development	Vasculogenesis	7.92e-07	Increased	2.098	AIMP1,ANXA2,APOA1,APOE,ARG1,BCLAF1,BMX,C5,C6,CAPNS1,CASP3,CAT,CD63,COL18A1,COL4A1,COL4A2,COL4A3,COL8A1,CRKL,CSPG4,CTH,CYP4F2,DICER1,DRAP1,ECM1,EHD3,EHD4,EPHX2,F11R,F2,FBLN1,FBLN5,FLNA,FN1,G6PD,GSN,HMGB1,HMGB2,HSD17B7,HSPG2,ICAM1,IDH3A,IGFBP7,ITGA2,ITGAM,ITGAV,LCN2,LTBP1,MAN2B1,MAP2K3,MAPK1,MAPK14,MFGE8,MGAT1,MMP9,MYH9,PARP1,PDCD10,PKM,PLOD3,PML,PRKAB2,PRKCD,PRKDC,PTK2B,PTPN1,RELA,RHOB,RHOG,SEPT9,…	89
Infectious Diseases,Inflammatory Disease,Organismal Injury and Abnormalities,Respiratory Disease	Severe acute respiratory syndrome	8.16e-07			ACSL1,AIMP1,CD63,F10,G3BP2,GYG1,HIST1H1C,ITGAM,LCN2,LTF,MNDA,MSRA,PYGL,RAB13,RAB31,SERPINA1,STXBP2,TIMP1,TUBB4B,ZYX	20
Free Radical Scavenging	Metabolism of reactive oxygen species	8.2e-07		1.942	ALDH2,ANXA2,APOA1,APOA4,APOC2,APOE,ARG1,ATG16L1,BAX,C5,CASP3,CAT,CLIC1,COL18A1,CRP,CTH,CTTN,DOCK2,DUOX2,ELANE,ERBIN,F2,FBLN5,FBP1,FLNA,FN1,G6PD,GSN,H2AFY,HMGB1,HNRNPK,HSP90AB1,HSPB1,HSPB6,ICAM1,IRF6,ITGAM,LETM1,LTBP1,LTF,MAP2K3,MAPK1,MAPK14,MBL2,MLPH,MRC1,NPC1,NQO1,PCK1,PON3,PRKCD,PTPN1,RPS6KB1,RRAS,RTN4,SDHA,SERPINA1,SERPINA4,SIRT1,SQSTM1,SRC,TXNRD2	62
Cancer,Organismal Injury and Abnormalities	Growth of tumor	8.25e-07	Increased	2.166	ACSL4,AGPS,AIMP1,AKR1B10,ANXA2,APOA1,BMX,CACYBP,CAPN2,CASP3,CD58,CD59,COL18A1,COL4A1,COL4A3,CRKL,CTSS,CTTN,CUL4A,DICER1,DNMT1,DSC2,EFEMP1,EIF4B,ELANE,F2,FABP5,FAM129B,FBLN5,FGA,FLNA,FN1,GALNT2,GLDC,GLS,GRB2,H2AFY,HDAC6,HMGA1,HMGB1,HMGB3,HNF4A,HSPG2,ICAM1,IDH3A,IFITM3,IGFBP7,IKZF1,IL16,ILF3,ITGAM,ITGAV,LAMA4,LAMTOR5,LCN2,LIMA1,MAP2K3,MAP4,MAPK1,MAPK14,MFGE8,MKI67,MMP9,NDRG1,NDRG2,NONO,NPM1,PAK2,PA…	101
Cellular Assembly and Organization	Quantity of actin filaments	8.43e-07		0.577	ARAP1,CFL1,COL18A1,CSK,F2,FLNA,FLNB,FN1,LIMA1,MARCKS,RBBP4,RELA,RHOB,RPS6KA3,SLC9A3R2,SRC	16
Cardiovascular Disease,Cardiovascular System Development and Function,Organ Morphology,Organismal Development,Organismal Injury and Abnormalities	Abnormal morphology of heart	8.52e-07			ACACB,ACADM,ACSL1,APOE,BMX,CAMK2D,CAPN2,CAPNS1,CASP3,CD2AP,CIAPIN1,COL18A1,COL3A1,CRKL,DES,DICER1,DNAJC3,DSC2,EIF2B5,EMD,ERBIN,F2,FLNA,FMOD,FN1,FUBP1,FXR1,G6PD,GBP2,GRB2,GSN,HIST1H1C,HMGB1,HSD17B7,HSPB8,HSPG2,HTRA2,ITGAV,LAMA4,LMCD1,LMNA,LTBP1,MAP2K3,MAPK1,MAPK14,MAPK3,MMP9,MYH9,MYL9,NCSTN,NEDD4L,NFKB1,PARP1,PDCD10,PDLIM3,PFKM,PFN1,POSTN,PPCS,PPP1CA,PRKCD,PRMT5,RAB1A,RPS6KB1,RTN4,S100A10,SDHA,SIR…	84
Cell Morphology,Cellular Assembly and Organization	Morphology of nucleus	8.73e-07			BUB3,CASP3,CHD4,CRKL,DEK,DNMT1,EMD,LMNA,LMNB1,LMNB2,MAP4,MAPK1,MAPK3,MAPRE1,MRE11,NUDCD3,PARP1,PML,RAN,RBBP4,RSL1D1,SEPT7,SIRT1,SRC,STMN1,TGFBI,TMPO,VIM,XRCC5	29
Dermatological Diseases and Conditions,Inflammatory Disease,Organismal Injury and Abnormalities,Skeletal and Muscular Disorders	Dermatomyositis	9.29e-07			ASPN,C5,CFL1,CNN3,COL3A1,COL4A1,COL4A2,COL5A1,COL6A1,COL6A2,COL6A3,GBP2,HMGB1,IFI30,S100A11,SDCBP,SERPINH1,TAX1BP3,TGFBI,TUBB2A	20
Cell Morphology,Embryonic Development	Shape change of embryonic cell lines	9.52e-07		0.945	EHD1,FLNA,FN1,ITGAM,MAPK1,PALLD,PTBP1,RHOG,RRAS,SRC,TNC,VIM	12
Protein Synthesis	Metabolism of cellular protein	1.04e-06			APOA1,APOA4,APOE,B2M,CTSH,DNAJC3,F2,FGA,FGG,FN1,GSN,HEXB,HSPG2,IGFBP7,L2HGDH,LAMC1,LMCD1,LTBP1,LTF,MFGE8,NAT8,NCSTN,SERPINA1,TGFBI,TIMP1,TNC,VCAN,VWA1	28
Cell Death and Survival,Neurological Disease,Organismal Injury and Abnormalities	Cell death of cortical neurons	1.04e-06		0.245	BAX,C7,CAPNS1,CASP3,CAT,EIF2A,EPHX2,FUS,GBA,GPT,HIP1,HMGB1,HMGB2,HSPB1,HTRA2,LCN2,MAP2K3,MAPK14,MECP2,NAE1,NFKB1,NPM1,PARP1,PEA15,RELA,SIRT1,SRC,YWHAB	28
Cellular Movement,Hematological System Development and Function,Immune Cell Trafficking,Inflammatory Response	Cellular infiltration by macrophages	1.13e-06		1.018	APOA1,APOE,ARG1,C5,C6,CNP,COL4A3,DICER1,DOCK2,F2,FCN1,GBA,ICAM1,IL16,IRF6,LMNB1,MMP9,NDRG1,NPC1,NQO1,PRKCD,PTK2B,PTPN1,RPL13A,S100A10,SIRT1,SOD3,VASP,YBX1	29
Protein Synthesis	Oligomerization of protein	1.24e-06			AHNAK,AKAP2,ANXA5,BAX,CAMK2D,CHMP4B,CHP1,DPYSL3,EHD1,EHD3,EHD4,FUS,GRB2,GRHPR,GSDMD,HAO2,HDAC6,IKZF1,JCHAIN,KHDRBS1,LETM1,MBL2,MMP9,NME2,NPM1,OPTN,PFKM,PPP5C,RBMX,SEPT11,SEPT7,SEPT9,SQSTM1,TRA2B,TRIM28,UPB1,VWF,YWHAB	38
DNA Replication, Recombination, and Repair	Conformational modification of DNA	1.26e-06	Increased	2.025	HMGA1,HMGB1,HMGB2,MCM2,MCM7,NCL,RPA1,RUVBL1,SSRP1,SUB1,UBTF	11
Amino Acid Metabolism,Small Molecule Biochemistry	Metabolism of essential amino acids	1.26e-06			AASS,AFMID,BHMT,BHMT2,FTCD,GSTZ1,HPD,MSRA,MTHFD1,PAH,SMS	11
Cellular Movement,Connective Tissue Development and Function	Migration of fibroblast cell lines	1.31e-06	Increased	3.367	ATG3,CENPF,CNN3,COL6A1,CRKL,CSK,EFEMP1,EHD1,F2,FABP5,FN1,HMGB1,LIMA1,MAPK14,MAPRE1,MMP9,NPM1,PALLD,PPIF,PRKCD,RELA,RHOC,RHOG,SRC	24
Cellular Function and Maintenance	Endocytosis by eukaryotic cells	1.31e-06	Increased	2.337	ANXA5,APOA1,APOE,BMX,C5,CAPG,CDC5L,CKB,CNN2,CORO1A,CRP,CSK,DOCK2,EHD1,FCN1,FLNA,GRB2,GSN,HGS,HMGB1,ICAM1,ITGAM,LCN2,MAPK14,MBL2,MFGE8,MRC1,MYH9,NAE1,NPM1,PALLD,PFN1,PKN2,PRKCD,RAB31,RHOB,RHOG,SF3B4,SRC,SRSF3,THBS1,VIM,YWHAQ	43
Inflammatory Response	Immune response of cells	1.4e-06	Increased	3.055	ANXA5,APOA1,APOE,ATG3,AZU1,BAX,C5,CAPG,CAT,CD59,CD74,CKB,CNN2,CORO1A,CRP,CSK,CTSS,DICER1,DOCK2,EHD1,EIF2AK2,ELANE,EXOC2,F10,FCN1,FLNA,FN1,GRB2,GSN,HMGB1,HSPB1,ICAM1,IGKC,ITGAL,ITGAM,ITGAV,LCN2,LTBP1,LTF,MAPK1,MAPK14,MBL2,MFGE8,MRC1,MYH9,NPM1,PALLD,PARP1,PFN1,PML,POSTN,PRKCD,RAB27A,RAB31,RAB8B,RELA,RHOG,SF3A1,SIRT1,SRC,TAP1,TAPBP,THBS1,THY1,TM9SF4,TOP2B,VIM,VWF	68
Cell Signaling	Small GTPase mediated signal transduction	1.43e-06		0.632	APOA1,CAMK2D,CFL1,CHP1,COL3A1,CRKL,CUL3,DBNL,DNMT1,EPS8,FBP1,G3BP2,GRB2,KANK2,MAPK14,NCKAP1,NUP62,RAB6C/RAB6D,RHOB,RHOG,RRAS,RTN4,SDCBP,SRC,STAMBP,STMN1,TAX1BP3,TRIM28,WASF2,YWHAQ	30
Infectious Diseases	Replication of Influenza virus	1.44e-06		1.872	ADAR,AHCYL1,B2M,CAD,CASP3,CD58,DCLK1,EIF2AK2,IFITM3,ILF3,KIF11,MAN2B1,MAP2K3,MAPK1,MMP9,MX1,NRBP1,NUDCD3,NUP205,NXF1,OAS3,PAK2,PML,POLR2A,PRKCD,RAB11B,RACGAP1,RELA,RPL13A,RPL35,SAFB,SF3A1,SF3B6,SNRPF,SON,TAP1,TUBB	37
Cancer,Gastrointestinal Disease,Organismal Injury and Abnormalities	Colorectal adenocarcinoma	1.46e-06			AASS,ABCF2,ACACB,ACOT9,ADAR,ADD3,AEBP1,AGL,AGRN,AHNAK2,AKAP2,AKR1B10,ALDH1B1,ALDH1L1,ALDH2,ALDH8A1,ALDOA,ANAPC1,AP3D1,API5,APIP,APOA4,ARAP1,ARHGAP10,ARHGEF16,ARMC8,ASPG,ASS1,ATG16L1,ATG3,ATXN2L,B2M,BAG6,BAX,BCAM,BCKDK,BMX,BST1,C2,C7,C8G,CACYBP,CAD,CAPN5,CAPRIN1,CASK,CASP3,CBX3,CCDC88B,CD2AP,CD58,CDC25C,CDC5L,CENPF,CHD4,CLPTM1L,CNP,COG2,COL12A1,COL18A1,COL4A2,COL4A3,COL5A1,COL6A1,COL6A3,COL8A1,CRO…	355
Hematological System Development and Function	Hemostasis	1.48e-06		0.208	ANXA2,ANXA5,APOA4,APOE,CARMIL1,CD59,CLIC1,CPB2,CRP,CTR9,CYP4F11,CYP4F2,EHD1,EHD3,EPX,F10,F2,FGA,FGB,FGG,FLNA,FN1,GP5,HNF4A,HSPG2,ICAM1,ITGA2,ITGAM,LCN2,MAPK1,MAPK3,MFGE8,NPC1,PAFAH2,PRKCD,RAB27A,SIRT1,SRC,THBS1,THBS2,VASP,VCAN,VWF	43
Cancer,Neurological Disease,Organismal Injury and Abnormalities	Anaplastic glioma	1.49e-06			ABAT,ACOT9,ADGRE5,ALDH2,ALDOA,CAP2,COL3A1,COL4A1,COL4A2,CSPG4,CSRP1,EFEMP1,EPPK1,FLNA,FN1,GBP2,GLDC,HDAC6,HIST1H1C,HNRNPA1,HNRNPA2B1,HSP90AB1,HSPA2,IFI30,ITGAV,LHPP,MARCKS,MKI67,MMP9,MYCBP2,MYH9,NPM1,PALLD,PARP1,PKM,PKP4,PPCS,PRMT5,RAD21,S100A13,SERPINA1,SF3B2,SIN3A,SLC12A2,SMC1A,SRC,TGFBI,TIMP1,TNC,TOP2B,TSPYL1,TUBA1C,TUBB2A,TUBB4B	54
Cancer,Endocrine System Disorders,Organismal Injury and Abnormalities,Reproductive System Disease	High-grade serous ovarian carcinoma	1.53e-06			AEBP1,COL5A1,COL6A2,PARP1,POSTN,SEPT9,THBS2,TOP2B,TUBA1C,TUBB2A,TUBB4B,VCAN	12
Cellular Function and Maintenance,Inflammatory Response	Phagocytosis	1.58e-06		1.951	ANXA5,APOA1,ATG3,AZU1,CAPG,CAT,CKB,CNN2,CORO1A,CRP,CSK,DOCK2,EHD1,EIF2AK2,ELANE,F10,FCN1,FLNA,GRB2,GSN,HDAC6,HMGB1,ICAM1,ITGAM,ITGAV,LCN2,MAPK1,MAPK14,MBL2,MFGE8,MRC1,MYH9,NPM1,PALLD,PFN1,PRKCD,RAB27A,RAB31,RHOG,SRC,THBS1,TM9SF4,VIM,VWF	44
Infectious Diseases	Production of HIV-1	1.6e-06		0.941	ADAR,DDX17,DICER1,EIF2AK2,GTF2I,HNRNPA1,HNRNPK,HNRNPR,HNRNPU,MON2,SDCBP,SERPINA1,TRIM22	13
Cancer,Organismal Injury and Abnormalities	Mucoepidermoid carcinoma	1.6e-06			COL6A3,DKC1,FN1,HNRNPK,IGLL1/IGLL5,LAMA4,LSP1,NDRG1,RAD21,RBBP4,SFN,TIMP1,TNC	13
Cell-To-Cell Signaling and Interaction	Binding of myeloid cells	1.62e-06		1.042	ADGRE5,APOA1,APOE,C5,CD2AP,CD58,CORO1A,CRP,CSK,CTTN,ELANE,F10,F2,FGA,FLNA,FN1,HMGB1,ICAM1,ITGAL,ITGAM,LBP,LSP1,LTF,MAPK14,MBL2,PAK2,RELA,RHOB,SERPINA1,THY1,VWF	31
Cell-To-Cell Signaling and Interaction	Binding of hematopoietic cell lines	1.63e-06		0.355	ANXA5,C5,CRKL,F2,FN1,ICAM1,IGKC,ITGA2,ITGAL,ITGAM,LTF,PTK2B,SIPA1,SRC,TNC	15
Cell-To-Cell Signaling and Interaction	Binding of blood cells	1.63e-06		1.163	ADGRE5,ANXA5,APOA1,APOA4,APOE,BCAM,C5,CD2AP,CD58,CD59,CD74,CORO1A,CRP,CSK,CTTN,DOCK2,ELANE,F10,F11R,F2,FGA,FGG,FLNA,FN1,GP5,HMGB1,HSPG2,ICAM1,ITGA2,ITGAL,ITGAM,LAMA5,LBP,LSP1,LTF,MAPK14,MBL2,MRC1,PAK2,PTK2B,RELA,RHOB,SERPINA1,SIPA1,SRC,STXBP2,THBS1,THBS2,THY1,TNC,UBE2I,VASP,VWF	53
Cell Death and Survival	Cell death of breast cancer cell lines	1.63e-06		1.236	ACSL4,B2M,BAX,BMX,CASP3,CAT,CYB5A,DHX9,EIF4B,ELANE,EXOC2,FBLN1,FN1,GPX2,HSPB1,HSPB8,HTRA2,ITGA2,KANK2,KIF11,LTV1,MAP2K3,MAPK1,MAPK14,MAPK3,MYBBP1A,MYO6,NQO1,OAS3,PARP1,PCK2,PEA15,PKM,PML,PRKCD,PRKDC,PSIP1,RABL6,RELA,RPS6KB1,SFN,SIRT1,SLC25A6,SRC,SSRP1,STMN1,THBS1	47
Amino Acid Metabolism,Small Molecule Biochemistry	Synthesis of sulfur amino acid	1.66e-06			AGXT2,BHMT,BHMT2,CTH,MTHFD1,SARDH,SHMT1	7
Cell-To-Cell Signaling and Interaction,Cellular Assembly and Organization,Cellular Function and Maintenance	Formation of focal adhesions	1.69e-06	Increased	2.973	AIMP1,CFL1,COL18A1,CRKL,CSK,CTTN,EHD1,F2,FN1,HMGB1,ITGA2,PPM1F,PTK2B,PTPN1,RBBP4,RCC2,RHOB,RHOC,RRAS,S100A10,SRC,STMN1,THBS1,THY1,VIM	25
Cancer,Organismal Injury and Abnormalities,Skeletal and Muscular Disorders	Muscle tumor	1.75e-06			ACACB,ACAD11,ADGRE5,ADH1B,AGR3,AGRN,AHCYL1,ALDH1B1,ALDOA,ASPN,ASS1,BDH1,C8G,CDC37L1,CNP,COL6A3,CPN2,CRKL,CSPG4,DCTN3,DDX24,DICER1,DNAJC3,DPT,EFTUD2,EML2,EPPK1,EXOC7,FMOD,GRB2,HMGA1,HSP90AB1,HSPG2,KPNA3,LSP1,LTBP1,MAP4,MAPK1,MAPK3,MFGE8,MLPH,MLYCD,MMP9,MYBBP1A,MYCBP2,MYH9,MYL6,NDRG1,NDUFB5,NSL1,OPTN,PCNA,PDXDC1,PI4KA,RELA,RENBP,RHOC,S100A11,SASH1,SF3A1,STAMBP,STK24,STXBP2,SYNE1,TJP1,TNC,TOP2B,TSFM…	73
Cancer,Hematological Disease,Immunological Disease,Organismal Injury and Abnormalities	Low-grade lymphoma	1.76e-06			AASS,AHNAK,ANXA2,ANXA4,BCAT1,BCLAF1,C7,CNP,COL12A1,COL18A1,COL3A1,CPSF7,EHD1,EIF2A,F11R,FEN1,FN1,FUBP1,FUS,GSN,GTF2I,HAO2,HCLS1,HDAC6,HIST1H1C,HNRNPU,IDH3A,IGLL1/IGLL5,ITSN2,KRR1,LRRFIP1,NCBP1,NFKB1,NID1,NID2,NONO,NUP205,NXF1,PARP1,PARP4,PCNA,PDLIM3,POLR3B,POSTN,PSIP1,PSME3,PTGES2,PTK2B,PTPN1,RBM14,SASH1,SEPT9,SHMT1,SLC25A24,SNX1,SRP54,STEAP3,THBS2,TNC,TNS1,TOP2B,TPR,TUBA1C,TUBB2A,TUBB4B,WASHC4,W…	67
Hematological System Development and Function	Coagulation	1.78e-06		0.409	ANXA2,ANXA5,APOE,CARMIL1,CD59,CLIC1,CPB2,CRP,CTR9,CYP4F11,CYP4F2,EHD1,EHD3,EPX,F10,F2,FGA,FGB,FGG,FLNA,GP5,HNF4A,HSPG2,ITGA2,LCN2,MAPK1,MAPK3,MFGE8,NPC1,PAFAH2,PRKCD,RAB27A,SIRT1,SRC,THBS1,THBS2,VASP,VCAN,VWF	39
Cardiovascular System Development and Function,Cellular Movement	Migration of endothelial cells	1.85e-06		1.74	AIMP1,ANXA2,APOE,BMX,CD63,CNN2,COL18A1,COL4A1,COL4A2,CRP,CSNK2B,DICER1,F11R,FLNA,FLNB,FN1,G6PD,HMGB1,HSP90AB1,HSPB1,ICAM1,ITGAV,MAP2K3,MAPK1,MAPK14,MARCKS,MECP2,MMP9,NCL,PKM,PML,PTK2B,PTPN1,RHOB,RTN4,SASH1,SEPT7,SIRT1,SRC,TGFBI,THBS1,THY1,TIMP1,TJP1,VASP,VIM	46
Endocrine System Disorders,Gastrointestinal Disease,Metabolic Disease,Organismal Injury and Abnormalities,Skeletal and Muscular Disorders	Diabetic foot ulcer disorder	1.92e-06			COL12A1,COL18A1,COL3A1,COL4A1,COL4A2,COL4A3,COL5A1,COL6A1,COL6A2,COL6A3,COL8A1,F10	12
Cellular Movement,Hematological System Development and Function,Immune Cell Trafficking,Inflammatory Response	Migration of phagocytes	2.02e-06		1.898	ANXA2,APOA1,APOE,BST1,C5,CD58,CD74,CNN2,COL4A1,CORO1A,CTSS,EPS8,F10,F11R,F2,FLNA,FN1,HARS,HCLS1,HMGB1,ICAM1,IL16,IRF6,ITGAL,ITGAM,ITGAV,LSP1,MAPK14,MMP9,NARS,NPM1,PARP1,PTK2B,RELA,RHOB,RTN4,S100A10,TIMP1,VCAN	39
DNA Replication, Recombination, and Repair	Recombination	2.05e-06	Increased	2.492	ALYREF,BANF1,CHD4,DNMT1,ENY2,GPS1,HMGA1,HMGB1,HMGB2,HNRNPC,IGKC,KANK2,MMS22L,MRE11,PARP1,PKN2,PRKDC,PRPF6,RAD21,RBMX,RPA1,RPA2,RUVBL1,SF3A3,SF3B2,SF3B4,SNRNP200,SNRPA1,TSN	29
Cell-To-Cell Signaling and Interaction	Adhesion of epithelial cells	2.2e-06		1.905	BST1,C5,CD58,ELANE,F10,FGA,FGG,FN1,ICAM1,ITGA2,ITGAL,ITGAM,ITGAV,PKN2,PNN,POSTN,PRKCD,RRAS,SRC,TIMP1	20
Cellular Movement,Hematological System Development and Function,Immune Cell Trafficking	Cell movement of granulocytes	2.27e-06		1.24	ANXA2,APOA1,APOE,AZU1,BST1,C2,C5,CAPG,CD74,CNN2,CORO1A,CRP,CSK,CTTN,DEK,DICER1,DOCK2,ELANE,EPHX2,F10,F2,FCN1,FN1,GBF1,GSN,HMGB1,HSPB1,ICAM1,IL16,IRF6,ITGAL,ITGAM,LAMA5,LBP,LCN2,LSP1,LTF,MAPK14,MMP9,NQO1,PARP1,RAB27A,RELA,RTN4,SERPINA1,TIMP1,VASP,VWF,YBX1	49
Cardiovascular Disease,Hematological Disease,Organismal Injury and Abnormalities	Anemia	2.33e-06	Decreased	-3.576	ACTL6A,ADD3,AGR2,ALDH2,ALDOA,APOE,BAX,C5,CAT,CD59,CRP,DNMT1,EPB41,F10,FN1,FUBP1,G6PD,GRHPR,HBZ,HMGB1,HNF4A,ICAM1,IFITM3,IKZF1,KHDRBS1,LAMA4,LCN2,MAPK14,MGAT1,MTHFD1,NDUFB11,NFKB1,NPM1,NQO1,PDCD10,PUS1,RELA,RPL35,RPS27,S100A11,SIPA1,SRC,SRSF2,STEAP3,TCEA1,TOP2B,TRIM28,TRNT1,TUBA1C,TUBB2A,TUBB4B,TXNRD2,U2AF1/U2AF1L5,VWF,YARS2	55
Cellular Movement,Hair and Skin Development and Function	Cell movement of epithelial cell lines	2.39e-06	Increased	3.031	APOA1,BST1,CTTN,F10,FBLN2,FGA,FLNA,FN1,GRB2,HARS,HDAC6,ICAM1,ITGA2,ITGAM,MAPRE1,NARS,NFKB1,POSTN,RELA,RHOG,SRC,SRSF1,TGFBI,VIM	24
Cell-To-Cell Signaling and Interaction,Embryonic Development	Adhesion of embryonic cell lines	2.39e-06		1.166	F10,FGA,FGG,FN1,ICAM1,ITGAM,ITGAV,PALLD,PNN,POSTN,RRAS,SRC,TIMP1	13
Cancer,Organismal Injury and Abnormalities,Reproductive System Disease	Prostate cancer	2.42e-06			AADAT,ACACB,ACADM,ACADS,ACOT7,ACOX2,ACSL4,ACSM3,ADAR,ADD3,ADRM1,AEBP1,AGR2,AHNAK,AKAP2,ALDH1L1,ALDH2,AMT,ANAPC1,ANLN,ANXA2,AP3D1,API5,APOA1,ARF5,ARHGAP10,ASNA1,ASPG,ASPN,ASS1,ATG16L1,ATXN2L,B2M,BAX,BCKDHA,BCKDK,BDH1,BMX,C2,C5,C5orf51,C6,C7,C8B,CAD,CASK,CASP3,CBX3,CD2AP,CD74,CDC25C,CDC5L,CENPF,CIRBP,CKB,CLPTM1L,CNP,COL12A1,COL18A1,COL3A1,COL4A1,COL4A2,COL5A1,COL6A2,COL6A3,COL8A1,COPS6,CPNE1,CPS1,C…	304
Skeletal and Muscular System Development and Function	Morphology of muscle	2.47e-06			ACADM,APOE,BAX,BMX,CAMK2D,CAT,CFL2,COL12A1,COL6A1,DES,DICER1,EFEMP1,EIF2B5,EMD,ENPP1,FMOD,FN1,FXR1,HMGB1,HSD11B1,HSD17B7,HSPB8,HSPG2,ICAM1,ILF3,ITGAV,LAMA4,LMCD1,LMNA,LMNB1,LMNB2,LTBP1,MAN2B1,MAP2K3,MAPK1,MAPK14,MMP9,MYCBP2,MYL9,NFKB1,PARP1,PDCD10,PFKM,PLOD1,PLOD3,PRKAB2,PRMT5,PUS1,RAB1A,RELA,RPS6KB1,SIRT1,SRC,SRI,SRL,SRSF10,SUN2,SYNE1,THBS1,THBS2,TIMP1,TK2,USP19	63
Cardiovascular System Development and Function,Organ Morphology,Organismal Development	Morphology of heart	2.57e-06			ACACB,ACADM,ACSL1,ADH1C,APOE,BMX,CAMK2D,CAPN2,CAPNS1,CASP3,CD2AP,CIAPIN1,COL18A1,COL3A1,CRKL,DES,DICER1,DNAJC3,DSC2,EIF2B5,EMD,ERBIN,F2,FLNA,FMOD,FN1,FUBP1,FXR1,G6PD,GBP2,GRB2,GSN,HIST1H1C,HMGB1,HSD17B7,HSPB8,HSPG2,HTRA2,ITGA2,ITGAV,LAMA4,LCN2,LMCD1,LMNA,LTBP1,MAP2K3,MAPK1,MAPK14,MAPK3,MMP9,MYH9,MYL9,NCSTN,NEDD4L,NFKB1,PARP1,PDCD10,PDLIM3,PFKM,PFN1,POSTN,PPCS,PPP1CA,PRKCD,PRMT5,RAB1A,RPS6KB1,RTN4…	87
Cell-To-Cell Signaling and Interaction,Hematological System Development and Function	Binding of leukocytes	2.73e-06		1.715	ADGRE5,ANXA5,APOA1,APOA4,APOE,C5,CD2AP,CD58,CD74,CORO1A,CRP,CSK,CTTN,DOCK2,ELANE,F10,F11R,F2,FGA,FGG,FLNA,FN1,HMGB1,ICAM1,ITGA2,ITGAL,ITGAM,LBP,LSP1,LTF,MAPK14,MBL2,MRC1,PAK2,PTK2B,RELA,RHOB,SERPINA1,SIPA1,SRC,STXBP2,THBS1,THBS2,THY1,TNC,UBE2I,VASP,VWF	48
Cancer,Endocrine System Disorders,Organismal Injury and Abnormalities,Reproductive System Disease	Ovarian cancer	2.79e-06			AASS,ABAT,ABCD1,ABCF2,ACAD11,ACADS,ACTR2,AEBP1,AGL,AGR2,AGR3,AHNAK2,AKAP2,ALDH1L1,ANLN,APIP,APOA1,APOE,AUH,B2M,BAG6,BCLAF1,BDH1,BMX,C5,C8B,CAD,CLIC1,COL18A1,COL3A1,COL4A1,COL4A2,COL5A1,COL6A2,COL6A3,CPB2,CRKL,CROCC,CRP,CUL4A,CYP4A11,DCLK1,DDX39A,DMGDH,DNMT1,EMD,EPPK1,EPS8,F2,FN1,FTCD,FUBP1,FUS,GAN,GBF1,GBP2,GCDH,GLDC,GMDS,GOT2,GYG1,H2AFY,HCLS1,HIST1H1C,HMGA1,HNF4A,HNRNPA2B1,HNRNPM,HS1BP3,HSD11B1,…	162
Cancer,Organismal Injury and Abnormalities,Reproductive System Disease	Prostatic tumor	2.87e-06		-0.218	AADAT,ACACB,ACADM,ACADS,ACOT7,ACOX2,ACSL4,ACSM3,ADAR,ADD3,ADRM1,AEBP1,AGR2,AHNAK,AKAP2,ALDH1L1,ALDH2,AMT,ANAPC1,ANLN,ANXA2,AP3D1,API5,APOA1,ARF5,ARHGAP10,ASNA1,ASPG,ASPN,ASS1,ATG16L1,ATXN2L,B2M,BAX,BCKDHA,BCKDK,BDH1,BMX,C2,C5,C5orf51,C6,C7,C8B,CAD,CASK,CASP3,CBX3,CD2AP,CD74,CDC25C,CDC5L,CENPF,CIRBP,CKB,CLPTM1L,CNP,COL12A1,COL18A1,COL3A1,COL4A1,COL4A2,COL5A1,COL6A2,COL6A3,COL8A1,COPS6,CPNE1,CPS1,C…	305
Cancer,Neurological Disease,Organismal Injury and Abnormalities	Central nervous system tumor	2.9e-06		-0.249	ABAT,ACOT9,ADGRE5,AKAP2,ALDH2,ALDOA,ANLN,ANXA2,BAG6,BAX,BCCIP,C6,CAP2,CAPN5,CASP3,CAT,CBX8,CENPF,COL12A1,COL18A1,COL3A1,COL4A1,COL4A2,COL4A3,COL6A2,COX20,CROCC,CSPG4,CSRP1,CTR9,CUL3,DES,DICER1,DNMT1,DPT,EFEMP1,EHD4,EIF4G2,EPPK1,F10,FAM120A,FAM129B,FLNA,FN1,FUBP1,GBF1,GBP2,GLDC,GOT2,GSN,GXYLT1,HDAC6,HIST1H1C,HMGB3,HNRNPA1,HNRNPA2B1,HSP90AB1,HSPA2,HSPG2,IFI30,IFITM3,IL16,ITGAV,KANK2,LAMA4,LETM1,LHP…	131
Cellular Movement,Renal and Urological System Development and Function	Migration of kidney cell lines	2.98e-06		1.585	CTTN,F10,FBLN2,FGA,FN1,HARS,HDAC6,ICAM1,ITGA2,ITGAM,MMP9,NARS,NFKB1,POSTN,RELA,RHOG,SEPT9,SRC,STK24	19
Cell-To-Cell Signaling and Interaction	Adhesion of myeloid cells	2.98e-06		1.558	ADGRE5,APOA1,C5,CD2AP,CORO1A,CRP,CSK,CTTN,F10,F2,FGA,FLNA,FN1,HMGB1,ICAM1,ITGAL,ITGAM,LTF,MAPK14,PAK2,RELA,RHOB,SERPINA1,THY1,VWF	25
Cell-To-Cell Signaling and Interaction	Adhesion of connective tissue cells	2.98e-06	Increased	2.512	ANXA2,CSK,DRG2,FN1,ICAM1,IPO9,ITGAL,ITGAM,ITGAV,MAPK1,MAPK3,PALLD,PML,POSTN,PTK2B,RAB21,RELA,RHOB,SRC,TGFBI,THBS2,THY1,TNC,VCAN,ZYX	25
Developmental Disorder,Hereditary Disorder,Organismal Injury and Abnormalities,Skeletal and Muscular Disorders	Dystrophy of muscle	3.07e-06			ADH1C,AHNAK,AKR1B10,ASPN,CFL1,CNN3,COL12A1,COL3A1,COL4A1,COL4A2,COL5A1,COL6A1,COL6A2,COL6A3,COL8A1,CTSS,DES,DPT,EMD,F10,FN1,FXR1,GOSR2,GYG2,IFI30,LBP,LMNA,PABPN1,S100A11,SDCBP,SERPINH1,SOD3,SUN2,SYNE1,TAX1BP3,TGFBI,TMEM43,TUBB2A	38
Infectious Diseases	Replication of Influenza A virus	3.09e-06		1.857	ADAR,AHCYL1,B2M,CAD,CD58,DCLK1,EIF2AK2,IFITM3,ILF3,KIF11,MAN2B1,MAP2K3,MAPK1,MMP9,MX1,NRBP1,NUDCD3,NUP205,NXF1,OAS3,PAK2,PML,POLR2A,PRKCD,RAB11B,RACGAP1,RELA,RPL13A,RPL35,SAFB,SF3A1,SF3B6,SNRPF,SON,TAP1,TUBB	36
Cellular Growth and Proliferation,Organismal Development	Growth of yeast	3.1e-06		0.234	AZU1,BAX,DICER1,DNAJC3,EIF2AK2,F2,HSP90AB1,MAPK14,MAPK3,MAPRE1,PARP1,PPP1CA,PPP1CB,RANBP1,SLC25A6,TOP2B,UBE2I	17
Lipid Metabolism,Molecular Transport,Small Molecule Biochemistry	Transport of long chain fatty acid	3.11e-06		0.826	ABCD1,ACSL1,ACSL4,ACSL5,APOE,FABP5,GOT2,NPC1,PLIN2	9
Cancer,Endocrine System Disorders,Organismal Injury and Abnormalities,Reproductive System Disease	Ovarian tumor	3.15e-06			AASS,ABAT,ABCD1,ABCF2,ACAD11,ACADS,ACTR2,AEBP1,AGL,AGR2,AGR3,AHNAK2,AKAP2,ALDH1L1,ALYREF,ANLN,APIP,APOA1,APOE,AUH,B2M,BAG6,BCLAF1,BDH1,BMX,C5,C8B,CAD,CLIC1,COL18A1,COL3A1,COL4A1,COL4A2,COL5A1,COL6A2,COL6A3,CPB2,CRKL,CROCC,CRP,CUL4A,CYP4A11,DCLK1,DDX39A,DICER1,DMGDH,DNMT1,EMD,EPPK1,EPS8,F2,FN1,FTCD,FUBP1,FUS,GAN,GBF1,GBP2,GCDH,GLDC,GMDS,GOT2,GYG1,H2AFY,HCLS1,HIST1H1C,HMGA1,HNF4A,HNRNPA2B1,HNRNPM,H…	165
Cancer,Gastrointestinal Disease,Organismal Injury and Abnormalities	Colon adenocarcinoma	3.27e-06			ABCF2,ACACB,ACOT9,ADAR,ADD3,AEBP1,AGL,AGRN,AHNAK2,AKAP2,AKR1B10,ALDH1B1,ALDH1L1,ALDH2,ALDH8A1,ALDOA,ANAPC1,AP3D1,API5,APIP,APOA4,ARAP1,ARHGAP10,ARHGEF16,ASPG,ASS1,ATG16L1,ATG3,ATXN2L,B2M,BAG6,BAX,BCAM,BCKDK,BMX,BST1,C2,C8G,CACYBP,CAD,CAPN5,CAPRIN1,CASK,CASP3,CBX3,CCDC88B,CD2AP,CD58,CDC25C,CDC5L,CENPF,CHD4,CLPTM1L,CNP,COG2,COL12A1,COL18A1,COL4A2,COL4A3,COL5A1,COL6A1,COL6A3,COL8A1,CROCC,CRTAP,CSPG4…	341
Cancer,Organismal Injury and Abnormalities	Benign connective or soft tissue neoplasm	3.28e-06			ADGRE5,ADH1B,AHCYL1,ALDH1B1,ALDOA,BDH1,CNP,COL12A1,COL18A1,COL3A1,COL4A1,COL4A2,COL4A3,COL5A1,COL6A1,COL6A2,COL6A3,COL8A1,DDX24,DPT,EPPK1,FLNA,FMOD,GRB2,HMGB1,HSP90AB1,KPNA3,LSP1,LTBP1,MAPK1,MAPK3,MYL6,NDRG1,NSL1,PCNA,PI4KA,RELA,S100A11,SF3A1,STAMBP,TNC,TOP2B,TUBA1C,TUBB2A,TUBB4B,VCAN,ZYX	47
Cancer,Organismal Injury and Abnormalities,Reproductive System Disease	Stage III-IV breast cancer	3.36e-06			BAX,BLVRA,CBX3,EFEMP1,EPS8,FAM49B,FN1,HSP90AB1,NME2,PARP1,PCNA,POLR2A,SIRT1,TMCO1,TOP2B,TUBA1C,TUBB,TUBB2A,TUBB4B	19
Hereditary Disorder,Organismal Injury and Abnormalities	X-linked hereditary disease	3.36e-06			ABCD1,ACSL4,ASPN,C5,CASK,CAT,CD74,CFL1,CNN3,COL3A1,COL4A1,COL4A2,COL5A1,COL6A1,COL6A2,COL6A3,CPS1,CTSS,DKC1,EIF2S3,EMD,F10,FLNA,G6PD,GDI1,HDAC6,HMGB3,HNRNPH2,IFI30,MECP2,NDUFB11,NONO,NQO1,PCNA,PDK3,RBMX,RPS6KA3,S100A11,SDCBP,SERPINA1,SERPINH1,SMC1A,SMS,TAX1BP3,TGFBI,TUBB2A	46
Lipid Metabolism,Small Molecule Biochemistry	Binding of lipid	3.44e-06		1.353	ANXA2,APOA1,APOE,F2,FKBP5,FN1,HDAC6,HIP1,HMGB1,HSP90AB1,LBP,MAP4,PTPN1,SFN,SRC,STMN1	16
Small Molecule Biochemistry	Metabolism of glyoxylic acid	3.47e-06			AGXT2,GOT2,GRHPR,HOGA1,PRODH2	5
Cancer,Organismal Injury and Abnormalities,Renal and Urological Disease	Upper renal tract carcinoma	3.48e-06			ABHD11,ACACB,ACADS,ACOT7,ACOX2,AGXT2,AHNAK,AKAP2,ANLN,ANXA2,ANXA5,ATXN2L,B2M,BAX,BST1,C2,CAD,CENPF,COL12A1,CPB2,CSPG4,CTR9,DICER1,DNAJC10,EHD3,EHHADH,EIF4G2,EPPK1,FABP5,FBLN5,FLG2,FLNA,FN1,FUBP1,G6PD,GBP2,GRHPR,GXYLT1,HDAC6,HIST1H1C,HMGB1,HNRNPM,HSD17B7,HSP90AB1,HSPB6,KHDRBS1,KHSRP,KIF11,LAMC1,LMNA,LUC7L2,LXN,MAP2K3,MAPK1,MAPK14,MCM2,MDN1,MKI67,MMP9,MYCBP2,MYL9,NASP,NT5C2,NUP62,OPTN,PALLD,PARP1,P…	112
Gene Expression	Transcription	3.72e-06	Increased	3.595	ACACB,ACTR2,AEBP1,AES,AGR2,AGRN,ALYREF,ANP32A,ANXA4,APOE,AZU1,BAX,BCLAF1,BMX,CAMK2D,CASK,CBX3,CBX8,CD74,CDC5L,CENPF,CHD4,CNN2,CNOT7,COL4A2,CPNE1,CRKL,CRP,CTR9,CTSH,CUL3,CUL4A,DCLK1,DDX17,DEK,DHX9,DICER1,DNMT1,DRAP1,ECM1,EFEMP1,EIF2AK2,EIF2B5,EIF4G2,ELANE,ELOB,ELP3,ENY2,EPHX2,EXOSC9,F2,FAM129B,FAM98A,FAM98B,FBP1,FECH,FLNA,FN1,FUBP1,FUS,GBP2,GSN,GTF2I,H2AFY,H2AFY2,HBZ,HCLS1,HDAC6,HEXB,HGS,HIP1,HIST…	198
Cancer,Endocrine System Disorders,Gastrointestinal Disease,Organismal Injury and Abnormalities	Pancreatic tumor	3.73e-06		0.215	ACACB,ACSM5,ACTBL2,ADAR,AGL,AGR2,AGXT2,AHNAK,AHNAK2,ALDOA,ALYREF,ANP32A,ANP32E,AP3D1,API5,ASPN,ATG16L1,ATPAF2,AUP1,BAX,BST1,C5,C5orf51,C8G,CAD,CAPN2,CASP3,CD59,CD63,CD74,CENPF,COL12A1,COL18A1,COL4A1,COL4A3,COL5A1,COL6A1,COL6A3,COL8A1,CPB2,CPN2,CRP,CSPG4,CTH,CTNNBL1,CTR9,CTSS,CTTN,CYP4F11,CYP4F2,DCLK1,DCPS,DDX59,DHX9,DOCK2,DRG2,DYNC1I2,EHD1,EHHADH,EIF2A,EIF2AK2,EIF2B4,EIF2B5,EIF2S3,ENOPH1,EPS15L1,…	232
Protein Degradation,Protein Synthesis	Catabolism of protein	3.91e-06		1.924	ADRM1,ANAPC1,APOA1,APOE,AZU1,BAG2,BAG6,BUB3,C5,CAPN2,CAPNS1,CASP3,CAT,CDC37,CFL1,CHP1,CPB2,CPNE1,CRTAP,CSPG4,CSTA,CTSH,CTSS,CUL3,CUL4A,DPP3,ECPAS,EIF2AK2,ELANE,F2,FLNA,GBA,GSN,HDAC6,HGS,HIP1,HIST1H1B,HSP90AB1,HSPG2,HTRA2,IFI30,IPO9,LACTB,LMNA,MMP9,MORC3,MYCBP2,MYH9,NCKAP1,NCSTN,NEDD4L,NEDD8,NPM1,NRDC,PDCD10,PFN1,PSME3,RBMX,RELA,RTN4,SERPINA1,SIRT1,SNX1,SNX12,SQSTM1,SRC,STT3B,UBE2I,UFD1,USP19,ZNF2…	71
Cancer,Neurological Disease,Organismal Injury and Abnormalities	Central nervous system solid tumor	3.92e-06		-0.249	ABAT,ACOT9,ADGRE5,AKAP2,ALDH2,ALDOA,ANLN,ANXA2,BAG6,BAX,BCCIP,C6,CAP2,CAPN5,CASP3,CAT,CBX8,CENPF,COL12A1,COL18A1,COL3A1,COL4A1,COL4A2,COL4A3,COL6A2,COX20,CROCC,CSPG4,CSRP1,CTR9,CUL3,DES,DICER1,DNMT1,DPT,EFEMP1,EHD4,EIF4G2,EPPK1,F10,FAM120A,FAM129B,FLNA,FN1,FUBP1,GBF1,GBP2,GLDC,GOT2,GSN,GXYLT1,HDAC6,HIST1H1C,HMGB3,HNRNPA1,HNRNPA2B1,HSP90AB1,HSPA2,HSPG2,IFI30,IFITM3,IL16,ITGAV,KANK2,LAMA4,LETM1,LHP…	130
Cancer,Organismal Injury and Abnormalities,Reproductive System Disease	Male genital neoplasm	3.96e-06		0.2	AADAT,ACACB,ACADM,ACADS,ACOT7,ACOX2,ACSL4,ACSM3,ADAR,ADD3,ADRM1,AEBP1,AGR2,AHNAK,AKAP2,ALDH1L1,ALDH2,ALYREF,AMT,ANAPC1,ANLN,ANXA2,AP3D1,API5,APOA1,ARF5,ARHGAP10,ASNA1,ASPG,ASPN,ASS1,ATG16L1,ATXN2L,B2M,BAX,BCKDHA,BCKDK,BDH1,BMX,C2,C5,C5orf51,C6,C7,C8B,CAD,CASK,CASP3,CBX3,CD2AP,CD74,CDC25C,CDC5L,CENPF,CIRBP,CKB,CLPTM1L,CNP,COL12A1,COL18A1,COL3A1,COL4A1,COL4A2,COL5A1,COL6A2,COL6A3,COL8A1,COPS6,CPNE1…	308
Post-Translational Modification,Protein Synthesis,Protein Trafficking	Homotetramerization of protein	3.98e-06			ACACB,ACADM,ACADS,APIP,CAT,CTH,DCXR,FBP1,GFPT1,GLS,HM13,PFKM,PFKP,PKM,SHMT1,UPB1	16
Infectious Diseases	Production of virus	3.99e-06		0.415	ADAR,CNP,DDX17,DICER1,EIF2AK2,GTF2I,HNRNPA1,HNRNPK,HNRNPR,HNRNPU,HSP90AB1,MON2,MX1,PML,SDCBP,SERPINA1,TRIM22,YBX1	18
Developmental Disorder,Hematological Disease,Hereditary Disorder,Immunological Disease,Organismal Injury and Abnormalities	Congenital afibrinogenemia	4e-06			F2,FGA,FGB,FGG	4
Cellular Growth and Proliferation,Tissue Development	Proliferation of epithelial cells	4.26e-06		-0.275	AGR2,BAX,BMX,C5,CASK,CASP3,CDC37,COL8A1,CPB2,CUL3,CUL4A,DICER1,EIF3H,EPPK1,ERBIN,F2,FBLN5,FN1,HDAC6,HNF4A,IGFBP7,IRF6,LAMA5,LAMC1,LCN2,LMNA,LMNB1,LTF,MAPK1,MAPK14,MFGE8,MKI67,MMP9,NCOA5,NCSTN,NDRG2,NFKB1,NME2,NPM1,PAK2,PBLD,PC,PML,POSTN,PRKCD,PRKDC,PTPN1,RELA,RIDA,RPS6KB1,RRAS,S100A11,SFN,SLC39A14,SRSF6,STMN1,THBS1,TIMP1,VIM	59
Endocrine System Disorders,Gastrointestinal Disease,Metabolic Disease,Organismal Injury and Abnormalities	Experimentally-induced diabetes	4.26e-06			ANXA2,ANXA5,C2,CASP3,CD74,COL4A1,FN1,GBP2,HSPB1,ICAM1,IFITM3,LCN2,NFKB1,PRKCD,PTPN1,RELA,RHOB,S100A10,TIMP1	19
Cell-To-Cell Signaling and Interaction	Binding of leukemia cell lines	4.38e-06		0.906	ANXA2,ANXA5,CPB2,F10,F11R,F2,FLNA,FN1,GMFG,HMGB1,ICAM1,ITGAL,ITGAM,ITGAV,NCL,PALLD,PTK2B,SIPA1,THY1,TNC,UBE2I	21
Protein Synthesis	Quantity of ldl cholesterol in blood	4.49e-06		-0.12	APOA1,APOE,CRP,CSPG4,CTSS,FGG,FMO5,HSD11B1,KIF13B,LCN2,MECP2,PON3	12
Cell Cycle,Cell Morphology,Cellular Assembly and Organization,Cellular Movement	Elongation of filaments	4.63e-06		1.633	FN1,HSPB1,MAPRE1,PFN1,SEPT7,SEPT9,VASP	7
Amino Acid Metabolism,Small Molecule Biochemistry	Synthesis of serine family amino acid	4.63e-06			AGXT2,CTH,MTHFD1,PKM,PSPH,SARDH,SHMT1	7
Cell-To-Cell Signaling and Interaction,Renal and Urological System Development and Function	Binding of kidney cell lines	4.65e-06		0.948	ANXA2,F10,FGA,FGG,FN1,GRB2,ICAM1,ITGAM,ITGAV,MRC1,PNN,POSTN,PRMT5,PTPN1,RRAS,SRC,TIMP1	17
Organismal Injury and Abnormalities	Bleeding	4.72e-06	Decreased	-5.383	ADAR,ANXA2,AP1M1,APOE,BAX,C5,CAPN2,CAPNS1,CNN1,COL18A1,COL4A1,COL4A2,COL4A3,CRP,DICER1,DNMT1,ELANE,F10,F2,FBLN1,FGA,FGB,FGG,FLNA,FN1,FUBP1,G6PD,GP5,HCLS1,HNRNPD,HSPG2,ICAM1,ITGAV,LAMA4,LAMC1,MAPK1,MAPK3,MGAT1,MMP9,MYH9,PLOD1,RAB27A,RELA,RPS6KB1,SERPINA1,SLC12A2,THBS1,THBS2,TIMP1,VPS26A,VWF,WASF2,YBX1	53
Cell-To-Cell Signaling and Interaction	Binding of epithelial cells	4.87e-06		1.855	BST1,C5,CD58,ELANE,F10,FGA,FGG,FN1,ICAM1,ITGA2,ITGAL,ITGAM,ITGAV,MFGE8,PKN2,PNN,POSTN,PRKCD,RRAS,SRC,TIMP1	21
Cancer,Gastrointestinal Disease,Organismal Injury and Abnormalities	Upper gastrointestinal tract cancer	4.91e-06			ACAD11,ACOT9,ACSL4,ADD3,ADH1B,AGRN,AHNAK,AHNAK2,AKAP2,ALDH2,AMDHD2,AMT,ANAPC1,ANLN,APOE,ARHGEF16,ASPN,ATXN2L,B2M,BAX,BCAM,BCKDHA,BHMT,BST1,BTBD18,C6,C8B,CAD,CASP3,CD63,CDC5L,CENPF,CFL2,CHD4,CKB,CNN1,COL12A1,COL18A1,COL4A1,COL4A2,COL5A1,COL6A2,COL6A3,COL8A1,CORO1A,CPS1,CRIP2,CRTAP,CSPG4,CSTA,CTPS1,CTR9,CTSH,CTTN,CUL4A,CYP4F11,CYP4F2,DDX24,DDX59,DHX57,DICER1,DKC1,DNMT1,DOCK2,DPT,DPYSL3,DSC2,DYNC1I2…	251
Cancer,Neurological Disease,Organismal Injury and Abnormalities	Nervous system neoplasm	4.94e-06		0.504	ABAT,ACOT9,ADGRE5,AKAP2,ALDH2,ALDOA,ANLN,ANXA2,BAG6,BAX,BCCIP,C5,C6,CAP2,CAPN5,CASP3,CAT,CBX8,CENPF,COL12A1,COL18A1,COL3A1,COL4A1,COL4A2,COL4A3,COL6A2,COX20,CROCC,CSPG4,CSRP1,CTR9,CUL3,DES,DICER1,DNMT1,DPT,EFEMP1,EHD4,EIF4G2,EPPK1,F10,FAM120A,FAM129B,FLNA,FN1,FUBP1,GBF1,GBP2,GLDC,GOT2,GSN,GXYLT1,HDAC6,HIST1H1C,HMGB3,HNRNPA1,HNRNPA2B1,HSP90AB1,HSPA2,HSPG2,IFI30,IFITM3,IL16,ITGAV,KANK2,KIF11,LAMA4,…	135
Cancer,Organismal Injury and Abnormalities,Reproductive System Disease	Invasive breast carcinoma	5.03e-06			BCCIP,CENPF,CNN1,EFEMP1,ELP3,FBLN5,FN1,HSP90AB1,HSPB6,HSPB8,LIMA1,MAPRE1,MCM2,MKI67,MMP9,MYH9,MYL9,PAK2,PALLD,PARP1,PCNA,PKM,POSTN,RACGAP1,RBM39,RELA,RTN4,SIRT1,SRC,SYNE1,TNC,TOP2B,TPM2,TRA2B,TUBA1C,TUBB2A,TUBB4B,YWHAQ	38
Infectious Diseases	Transport of virus	5.06e-06			MAPRE1,NUP107,NUP133,NUP155,NUP205,NUP210,NUP35,NUP37,NUP43,NUP62,NUP93,RAN,TPR	13
Cancer,Organismal Injury and Abnormalities,Reproductive System Disease	Malignant neoplasm of male genital organ	5.22e-06			AADAT,ACACB,ACADM,ACADS,ACOT7,ACOX2,ACSL4,ACSM3,ADAR,ADD3,ADRM1,AEBP1,AGR2,AHNAK,AKAP2,ALDH1L1,ALDH2,AMT,ANAPC1,ANLN,ANXA2,AP3D1,API5,APOA1,ARF5,ARHGAP10,ASNA1,ASPG,ASPN,ASS1,ATG16L1,ATXN2L,B2M,BAX,BCKDHA,BCKDK,BDH1,BMX,C2,C5,C5orf51,C6,C7,C8B,CAD,CASK,CASP3,CBX3,CD2AP,CD74,CDC25C,CDC5L,CENPF,CIRBP,CKB,CLPTM1L,CNP,COL12A1,COL18A1,COL3A1,COL4A1,COL4A2,COL5A1,COL6A2,COL6A3,COL8A1,COPS6,CPNE1,CPS1,C…	305
Cell-To-Cell Signaling and Interaction	Detachment of cells	5.28e-06		0.366	ANXA5,CAPN2,CRKL,CSK,ELANE,F2,FLNA,FN1,GBF1,GSN,ITGAL,MAPK1,MGAT1,PTK2B,SIPA1,SRC	16
Cancer,Organismal Injury and Abnormalities,Renal and Urological Disease	Kidney carcinoma	5.33e-06			ABHD11,ACACB,ACADS,ACOT7,ACOX2,AGXT2,AHNAK,AKAP2,ANLN,ANXA2,ANXA5,ATXN2L,B2M,BAX,BST1,C2,CAD,CENPF,COL12A1,CPB2,CSPG4,CTR9,DICER1,DNAJC10,EHD3,EHHADH,EIF4G2,EPPK1,FABP5,FBLN5,FLG2,FLNA,FN1,G6PD,GBP2,GRHPR,GXYLT1,HDAC6,HIST1H1C,HMGB1,HNRNPM,HSD17B7,HSP90AB1,HSPB6,KHDRBS1,KHSRP,KIF11,LAMC1,LMNA,LUC7L2,LXN,MAP2K3,MAPK1,MAPK14,MCM2,MDN1,MKI67,MMP9,MYCBP2,MYL9,NASP,NT5C2,NUP62,OPTN,PALLD,PARP1,PBLD,PC…	111
Developmental Disorder	Autism spectrum disorder or intellectual disability	5.37e-06			ABAT,ABCD1,ACSL4,ACSL5,ANXA2,ANXA5,ARG1,C5,CASK,CHD4,CLIC1,COL12A1,COL18A1,CSNK2B,CYB5A,CYP4F11,EFTUD2,EIF2S3,FLNA,FMO5,GBP2,GDI1,GYG1,H2AFY2,HNRNPH2,HNRNPK,HNRNPU,IFITM3,IGFBP7,IGHG2,IMPA1,KIF1BP,L2HGDH,LDHD,MECP2,MYBBP1A,MYO6,NONO,NSUN2,PAH,PI4KA,PPP2R5D,PRKAB2,RAB3GAP2,RABL6,RBM8A,RBMX,RHOC,RPS6KA3,SERPINA1,SET,SIN3A,SLC12A2,SMS,SON,SYNE1,TAP1,TIMP1,TMCO1,TOP2B,TUBB,TUBB2A,WASHC4,WDR62,ZADH2	65
Cancer,Organismal Injury and Abnormalities,Renal and Urological Disease	Development of urinary tract tumor	5.38e-06			ABHD11,ACACB,ACADS,ACOT7,ACOX2,AGXT2,AHNAK,AKAP2,ANLN,ANXA2,ANXA5,ATXN2L,B2M,BAX,BST1,C2,CAD,CENPF,COL12A1,CPB2,CSPG4,CTR9,DICER1,DNAJC10,EHD3,EHHADH,EIF4G2,EPPK1,FABP5,FBLN5,FLG2,FLNA,FN1,G6PD,GBP2,GRHPR,GXYLT1,HDAC6,HIST1H1C,HMGB1,HNRNPM,HSD17B7,HSP90AB1,HSPB6,KHDRBS1,KHSRP,KIF11,LAMC1,LMNA,LUC7L2,LXN,MAP2K3,MAPK1,MAPK14,MCM2,MDN1,MFGE8,MKI67,MMP9,MYCBP2,MYL9,NASP,NCSTN,NT5C2,NUP62,OPTN,PALLD,P…	110
Cell-To-Cell Signaling and Interaction,Renal and Urological System Development and Function	Adhesion of kidney cell lines	5.48e-06		0.826	F10,FGA,FGG,FN1,ICAM1,ITGAM,ITGAV,PNN,POSTN,RRAS,SRC,TIMP1	12
Hematological System Development and Function,Organismal Functions	Coagulation of blood	5.61e-06		-0.183	ANXA2,ANXA5,APOE,CARMIL1,CD59,CLIC1,CPB2,CRP,CYP4F11,CYP4F2,EHD1,EHD3,EPX,F10,F2,FGA,FGB,FGG,FLNA,GP5,HNF4A,HSPG2,ITGA2,LCN2,MAPK1,MAPK3,MFGE8,NPC1,PAFAH2,PRKCD,RAB27A,SRC,THBS1,THBS2,VASP,VCAN,VWF	37
Cancer,Organismal Injury and Abnormalities	Endometrioid carcinoma	5.81e-06			AASS,ABCD1,ABCF2,ACACB,ACAD11,ACADM,ACADS,ACADSB,ACSL1,ACSL4,ACSM3,ACTR2,ADD3,AGL,AGPS,AGXT2,AHCYL1,AHNAK,AHNAK2,ALDH1B1,ALDH1L1,ALDH8A1,ANLN,ANP32B,ANP32E,AP3D1,APIP,APOE,ASPN,ATG16L1,AUH,B2M,BAG6,BCAT1,BCLAF1,BDH1,BMX,C5,C6,C7,C8B,CAD,CAP2,CAPN2,CAPN5,CASK,CCDC88B,CD74,CENPF,CHD4,COL12A1,COL4A2,COL5A1,COL6A3,COPS4,CPS1,CROCC,CRP,CSPG4,CTH,CTPS1,CYP4F2,DCLK1,DCPS,DDX24,DHRS1,DHX57,DHX9,DICER1,DM…	255
Cell Morphology,Cellular Movement	Cell spreading of connective tissue cells	6.01e-06		1.929	DRG2,FN1,LPP,MAPK3,PALLD,PTK2B,RHOB,THBS2,TNS1,VASP	10
Cell Morphology,Cellular Function and Maintenance	Autophagy of cells	6.25e-06		0.446	ATG16L1,ATG3,BAG6,BAX,BCKDHA,CAPNS1,CAT,CHMP4B,CSNK2B,DICER1,EIF2AK2,EIF4G2,ERBIN,EXOC2,FN1,GBA,HDAC6,HGS,HMGB1,HSPB8,HSPG2,LETM1,MAPK14,NDRG1,NEDD4L,NPC1,NQO1,OPTN,PARP1,PIP4K2B,PKM,PRKAB2,PRKCD,PRKDC,RAB1A,RELA,RPS6KB1,SERPINA1,SERPINH1,SIRT1,SNX27,SQSTM1,SRC,TBC1D4,THBS2,TOMM22,TOMM40,TRIM22,USP19,YWHAQ	50
Cellular Assembly and Organization	Stabilization of filaments	6.52e-06		0.79	CFL1,CTTN,DCLK1,EML2,FLNA,GAN,GSN,ITGAM,MAP4,MAPRE1,NQO1,PKM,PTK2B,RPS6KA3,SEPT7,STK24,STMN1,VASP	18
Cancer,Neurological Disease,Organismal Injury and Abnormalities	Glioblastoma	6.57e-06			ACOT9,ADGRE5,ALDH2,ALDOA,CAP2,COL3A1,COL4A1,COL4A2,CSPG4,CSRP1,EFEMP1,EPPK1,FLNA,FN1,GBP2,GLDC,HIST1H1C,HNRNPA1,HNRNPA2B1,HSP90AB1,HSPA2,IFI30,ITGAV,LHPP,MARCKS,MKI67,MMP9,MYCBP2,MYH9,NPM1,PALLD,PARP1,PKM,PKP4,PPCS,PRMT5,RAD21,S100A13,SERPINA1,SF3B2,SIN3A,SLC12A2,SMC1A,SRC,TGFBI,TIMP1,TNC,TSPYL1,TUBA1C,TUBB2A,TUBB4B	51
Hereditary Disorder,Immunological Disease,Organismal Injury and Abnormalities	Autosomal recessive immunodeficiency	6.79e-06			B2M,C2,C8B,CORO1A,CTPS1,DOCK2,FGA,FGB,FGG,IGKC,IGLL1/IGLL5,MLPH,MTHFD1,PRKCD,PRKDC,RAB27A,TAP1,TAP2,TAPBP,TRNT1	20
Cell Cycle,Gene Expression	Binding of DNA	7.11e-06	Increased	2.453	ABCD1,AIMP1,ALYREF,ASS1,BMX,CAT,CFL1,CRIP2,CTR9,CUL4A,ELANE,F10,F2,FN1,GBP2,GFPT1,HMGA1,HMGB1,HMGB2,HNF4A,HNRNPC,ITGA2,ITGAM,LMCD1,LMNA,LTF,MAPK1,MAPK14,MAPK3,NCL,NFKB1,NPM1,PARP1,PBXIP1,PCK1,PCNA,PKM,PML,PPP5C,PRKCD,PRKDC,PSIP1,PSME3,PTPN1,RAD21,RELA,RHOB,RPA1,RPRD1B,RPS6KA3,SET,SIRT1,SRC,SUB1,TRIM28,TXLNG,XRCC5,YBX1,YWHAB	59
Inflammatory Response,Organismal Injury and Abnormalities	Inflammation of organ	7.14e-06		-1.293	ABAT,AGR2,AHNAK,ALDH2,ALDOA,ANXA4,ANXA5,APOA1,APOA4,APOE,ARG1,ARHGAP10,ATG16L1,B2M,BAX,BMX,C5,C6,CAPG,CASP3,CAT,CD74,CFL1,CHD4,CKB,CNN3,COL3A1,COL4A1,COL4A3,CORO1A,CPB2,CPNE1,CROCC,CRP,CSK,CTSS,ECM1,EHD1,EHD3,EHD4,EIF2AK2,EPPK1,EPS8,EPX,F10,F2,FABP5,FCGBP,FGA,FLNA,FN1,FUS,FXR1,GBA,GBP2,GCSH,GPT,GPX2,GSDMD,GSN,GSTZ1,GTPBP1,HDAC6,HMGB1,HNRNPR,HSD11B1,ICAM1,IFI30,IGKC,IL16,ITGAL,ITGAM,ITGAV,JCHAIN,K…	136
Nucleic Acid Metabolism,Small Molecule Biochemistry	Synthesis of purine nucleotide	7.66e-06		1.936	ACOT7,ADSS,ALDH2,ALDOA,F2,FBP1,FUS,G6PD,GMDS,HMGB1,KYNU,LETM1,MAN2B1,MSRA,MTHFD1,NME2,NT5C2,PARP1,PKM,PML,PPA1,PPCS,PPIF,PRKCD,PTK2B,SIRT1	26
Tissue Morphology	Degradation of extracellular matrix	7.7e-06		0.835	CTSH,CTSS,CTTN,KIF5B,MMP9,NPM1,S100A10,SOD3,SRC,TIMP1	10
Amino Acid Metabolism,Small Molecule Biochemistry	Metabolism of serine family amino acid	7.71e-06			AMT,CTH,GCSH,GLDC,GLYAT,MTHFD1,PKM,PSPH,SHMT1	9
Cell Morphology,Cellular Movement,Embryonic Development	Cell spreading of embryonic cell lines	7.71e-06		1.568	EHD1,FLNA,FN1,ITGAM,PALLD,PTBP1,RHOG,TNC,VIM	9
Inflammatory Response	Inflammatory response	7.79e-06	Increased	3.767	ABCD1,ADGRE5,AIMP1,ANXA2,APOA1,APOE,AZU1,BST1,C5,C6,CAPG,CASP3,CD63,CD74,CIRBP,COL18A1,CORO1A,CPB2,CRP,CSPG4,CTSS,CYP4F11,DEK,DHX9,DICER1,DOCK2,ECM1,ELANE,EPHX2,EPX,F11R,F2,FGG,FN1,GBF1,GSN,HMGB1,HNF4A,HNRNPA0,HSPB1,HSPG2,ICAM1,IL16,IRF6,ITGA2,ITGAL,ITGAM,ITGAV,LBP,LCN2,LSP1,LTBP1,LTF,MAP2K3,MAPK14,MAPK3,MFGE8,MMP9,MSRA,MVK,NCL,NDRG2,NFKB1,NPC1,PARP1,PARP4,PFN1,PLIN2,PRKCD,PTK2B,RAB27A,RELA,RHOB,…	86
Cell Morphology,Connective Tissue Development and Function	Shape change of fibroblast cell lines	7.95e-06		0.902	CENPF,EHD1,FLNA,FN1,GBP2,IPO9,MAPK14,MARCKS,PALLD,PTBP1,RHOG,RTN4,SRC,THBS1,TNC,VIM	16
Cancer,Organismal Injury and Abnormalities	Metastasis of cells	8.19e-06		1.597	AGR2,B2M,CAPN2,CASP3,CD59,CNN1,COL18A1,COL4A1,COL4A2,CTTN,DICER1,EFEMP1,F2,FABP5,FN1,ITGA2,ITGAV,LAMA5,MAP2K3,MAP4,MAPK1,MMP9,NCKAP1,NDRG1,NDRG2,NID2,PCNA,PSMD10,PTK2B,RELA,RHOB,RHOC,RPS6KA3,SDCBP,SERPINA1,SQSTM1,SRC,SRSF6,THBS1,THY1,TIMP1,U2AF2	42
DNA Replication, Recombination, and Repair	DNA damage	8.24e-06		-1.208	ALDH2,BAX,BUB3,CASP3,CAT,CTSS,DICER1,DNMT1,EIF2AK2,FN1,G6PD,HSPB1,LMNA,LMNB1,LMNB2,MCM2,MRE11,NPM1,NQO1,PARP1,PCNA,PML,PRKDC,RPA1,SF3B2,SF3B4,SQSTM1,SUN2,TOP2B,XRCC5,ZNF207	31
Molecular Transport,Protein Trafficking	Internalization of protein	8.38e-06	Increased	2.72	CFL1,FLNA,HCLS1,HGS,HIP1,HSPG2,IPO7,IPO9,LMNA,MAPK1,MAPK14,NUP155,NUP62,PML,PRKCD,RAN,RANGAP1,TOMM40,TPR,TRIM28	20
Cell Cycle	Interaction of DNA	8.54e-06	Increased	2.546	ABCD1,AIMP1,ALYREF,ASS1,BMX,CAT,CFL1,CRIP2,CTR9,CUL4A,ELANE,F10,F2,FN1,FUS,GBP2,GFPT1,HMGA1,HMGB1,HMGB2,HNF4A,HNRNPC,ITGA2,ITGAM,LMCD1,LMNA,LTF,MAPK1,MAPK14,MAPK3,NCL,NFKB1,NPM1,PARP1,PBXIP1,PCK1,PCNA,PKM,PML,PPP5C,PRKCD,PRKDC,PSIP1,PSME3,PTPN1,RAD21,RELA,RHOB,RPA1,RPRD1B,RPS6KA3,SET,SIRT1,SRC,SUB1,TRIM28,TXLNG,XRCC5,YBX1,YWHAB	60
[truncated: 49 more rows]
